# Supplementary material for: Dynamic Proteomics of Human Protein Level and Localization across the Cell Cycle
Source: PLoS One. 2012 Nov 7;7(11):e48722. doi: 10.1371/journal.pone.0048722 (PMC3492413; doi:10.1371/journal.pone.0048722)
Supplement: Table S1 — The Supplementary table S1 includes the full dataset of protein profiles and scores. (XLSX) [file pone.0048722.s011.xlsx]

## Sheet: summary_table
	Localization category	Compartment	number of genes (in all the list)	%	number of genes (in Cycling genes)	%
	1	Cytoplasm	137	0.276768	72	0.361809
	2	Nucleus	124	0.250505	39	0.19598
	3	ER	13	0.0262626	9	0.0452261
	4	Golgi	13	0.0262626	4	0.0201005
	5	Mitochondria	16	0.0323232	7	0.0351759
	6	intracellular	90	0.181818	28	0.140704
	7	plasma membrane	16	0.0323232	5	0.0251256
	8	fillopodia	4	0.00808081	2	0.0100503
	9	other	82	0.165657	33	0.165829
			495		199															9 out of the 56 proteins that are cyling in the protein level (annotation 1) are also annotated with "cell-cycle" GO term	24 out of the 157 proteins that are annotated with "cell-cycle" Gene cards are also cyling in the protein level (annotation -1)
																				0.160714	0.152866
																				22 out of the 47 proteinsthat are annotated with "cell-cycle" GO term are also cyling in one of the features tested (annotations -1-6)	68 out of the157 proteins that are annotated with "cell-cycle" Gene cards are also cyling in one of the features tested (annotations -1-6)
																				0.468085	0.462585
			% of cycling proteins	0.11		0.0888889	0.21		0.0585859		0.153535		0.0282828		0.0727273		0.40202	0.228283	0.357576	0.0949495	0.317172
			number of cycling protein	56		44	97		29		76		14		36		199	113	177	47 proteins	157 proteins
protein name	Description	localization	1 - cytoplasm, 2 -nucleus , 3- ER, 4 - Golgi 5 - mitochondirion 6- intracellular 7 -plasma membrane 8 - fillopodia 9-other	Total protein score (Threshold - 0.3)	Cycling protein -1	score of the median pixel - 90th percentile (Threshold - 0.3)	Nuclear Localization score nuc / tot score stdev 8:60 (Threshold - 0.08)	Cycling nuclear localization (nuc/total) - 2	score contrast percentile (Threshold - 0.4)	Cycling contrast	Score energy (threshold - 0.15)	Cycling energy	Correlation score (Threshold - 0.05)	Cycling energy	Score homogenity (Threshold > 0.02)	Cycling homogenity	Cycling in one of the features	cycling features	Cycling in localization of proteins (texture features + nuclear localization )	Known cycling genes (By Go terms 'Cell Cycle')	Known cycling genes (by Gene Cards with the keyword "cell-cycle")
AA282714	zt13f10.r1 NCI_CGAP_GCB1 Homo sapiens cDNA clone IMAGE:713035 5', mRNA sequence.	cytoplasm	1	0.114		0.264	0.0672414		#N/A		#N/A		#N/A		#N/A		0	0	0	0	0
ACOT7	acyl-CoA thioesterase 7 isoform hBACHb	cytoplasm	1	0.1325		0.08	0.0385505		0.236		0.191	4	0.012		0.021	6	1	1	1	0	0
ACTN4	actinin, alpha 4	cytoplasm,pseudopodia/fillopodia	8	0.166		0.26	0.110236	2	#N/A		0.042		0.01		0.008		1	0	1	0	0
ACTR1A	ARP1 actin-related protein 1 homolog A,	cytoplasm	1	0.084		0.317	0.0870564	2	#N/A		0.207	4	0.013		0.024	6	1	1	1	1	1
ACTR2	actin-related protein 2 isoform a	cytoplasm	1	0.234		0.11	0.0251656		#N/A		0.143		0.039		0.029	6	1	1	1	1	1
ACYP2	muscle-type acylphosphatase 2	cytoplasm	1	0.095		0.22	0.0477194		0.185		0.037		0.015		0.007		0	0	0	0	0
ADK	adenosine kinase isoform b	intracellular	6	0.1295		0.09	0.0888144	2	0.061		0.076		0.006		0.01		1	0	1	0	1
AF086125	Homo sapiens full length insert cDNA clone ZA79D12.	nucleus	2	0.254		0.3	0.103132	2	0.431	3	0.245	4	0.008		0.018		1	1	1	0	0
AF087973	Homo sapiens full length insert cDNA clone YU79H10.	cytoplasm,plasma membrane	9	0.126		0.207	0.104404	2	#N/A		0.443	4	0.01		0.038	6	1	1	1	0	0
AI001881	ot39c06.s1 Soares_testis_NHT Homo sapiens cDNA clone IMAGE:1619146 3', mRNA sequence.	cytoplasm,plasma membrane	9	0.134		0.05	0.0525711		#N/A		0.099		0.064	5	0.033	6	1	1	1	0	0
AI208228	qg50b01.x1 Soares_testis_NHT Homo sapiens cDNA clone IMAGE:1838569 3', mRNA sequence.	cytoplasm	1	0.288		#N/A	0.0479999		#N/A		#N/A		#N/A		#N/A		0	0	0	0	0
AI217733	qh15h09.x1 Soares_NFL_T_GBC_S1 Homo sapiens cDNA clone IMAGE:1844801 3' similar to SW:FTCD_PIG P53603 FORMIMINOTRANSFERASE-CYCLODEAMINASE ;contains element PTR5 repetitive element ;, mRNA sequence.	cytoplasm	1	0.039		0.187	0.0524674		0.24		0.043		0.018		0.004		0	0	0	0	0
AI342698	qo35e04.x1 NCI_CGAP_Lu5 Homo sapiens cDNA clone IMAGE:1910526 3' similar to gb:L01457 AUTOANTIGEN PM-SCL (HUMAN);, mRNA sequence.	cytoplasm	1	0.118		0.2	0.0379079		0.185		0.089		0.02		0.01		0	0	0	0	0
AI671392	wc29g07.x1 NCI_CGAP_Kid11 Homo sapiens cDNA clone IMAGE:2316636 3', mRNA sequence.	nucleus	2	0.09		0.27	0.0188069		0.125		0.101		0.019		0.013		0	0	0	0	0
AI733141	ol81a03.x5 NCI_CGAP_Kid5 Homo sapiens cDNA clone IMAGE:1535980 3', mRNA sequence.	nucleus	2	0.0995		0.209	0.0529846		0.221		0.074		0.0105		0.0075		0	0	0	0	0
AI863545	wh72g06.x1 NCI_CGAP_Kid11 Homo sapiens cDNA clone IMAGE:2386330 3', mRNA sequence.	mitochondrion	5	0.32	1	0.337	0.0626663		0.213		0.251	4	0.021		0.014		1	1	1	0	0
AK022356	Homo sapiens cDNA FLJ12294 fis, clone MAMMA1001817.	intracellular	6	0.109		0.27	0.0622539		0.337		0.122		0.013		0.014		0	0	0	0	0
AK056115	Homo sapiens cDNA FLJ31553 fis, clone NT2RI2001178.	plasma membrane	7	0.363	1	#N/A	0.0374466		#N/A		#N/A		#N/A		#N/A		1	0	0	0	0
AK091021	Homo sapiens cDNA FLJ33702 fis, clone BRAWH2005533.	plasma membrane	7	0.285		0.117	0.0447311		0.218		0.042		0.018		0.007		0	0	0	0	0
AK092541	Homo sapiens cDNA FLJ35222 fis, clone PROST2000835.	endoplasmic reticulum	3	0.12		0.057	0.0557324		0.324		0.097		0.03		0.01		0	0	0	0	0
AK094352	Homo sapiens cDNA FLJ37033 fis, clone BRACE2011389.	intracellular	6	0.103		0.164	0.0794365		#N/A		0.054		0.018		0.006		0	0	0	0	0
AK094903	Homo sapiens cDNA FLJ37584 fis, clone BRCOC2004950.	nucleus	2	0.058		0.17	0.0312418		0.224		0.082		0.018		0.01		0	0	0	0	0
AK097571	Homo sapiens cDNA FLJ40252 fis, clone TESTI2024299.	nucleus	2	0.42	1	#N/A	0.0441876		#N/A		#N/A		#N/A		#N/A		1	0	0	0	0
AK097658	Homo sapiens cDNA FLJ40339 fis, clone TESTI2032079.	intracellular	6	0.163		0.287	0.031108		0.168		0.106		0.014		0.012		0	0	0	0	0
AK127877	Homo sapiens cDNA FLJ45982 fis, clone PROST2017729.	intracellular	6	0.095		0.247	0.0383088		0.342		0.126		0.017		0.01		0	0	0	0	0
AKAP8L	A kinase (PRKA) anchor protein 8-like	nucleus	2	0.1395		0.12	0.027902		0.136		0.097		0.013		0.007		0	0	0	0	1
ALDH3B1	Homo sapiens mRNA for aldehyde dehydrogenase 3B1 variant protein.	plasma membrane	7	0.204		0.42	0.0782895		0.208		0.12		0.035		0.014		0	0	0	0	0
ANLN	anillin, actin binding protein (scraps homolog,	cytoskeleton,nucleus	9	0.3295	1	0.24	0.0935931	2	0.288		0.171	4	0.017		0.013		1	1	1	1	1
ANXA2	annexin A2 isoform 1	cytoplasm,plasma membrane	9	0.2257		#N/A	#N/A		0.373		#N/A		#N/A		#N/A		0	0	0	0	1
APLP2	amyloid beta (A4) precursor-like protein 2	plasma membrane,nucleus	7	0.122		0.107	0.0512783		0.352		0.058		0.012		0.002		0	0	0	0	0
ARID1B	AT rich interactive domain 1B (SWI1-like)	nucleus,nucleolus	2	0.2357		0.076	0.0505623		0.329		0.191	4	0.0853	5	0.0203	6	1	1	1	0	1
ARL3	ADP-ribosylation factor-like 3	intracellular	6	0.1505		0.17	0.0674675		0.3405		0.0515		0.018		0.0085		0	0	0	1	1
ARL6IP1	ADP-ribosylation factor-like 6 interacting	endoplasmic reticulum	3	0.121		#N/A	0.0468012		#N/A		#N/A		#N/A		#N/A		0	0	0	0	0
ARPC1A	actin related protein 2/3 complex subunit 1A	plasma membrane,cytoskeleton	7	0.092		0.25	0.0502281		0.358		0.087		0.004		0.013		0	0	0	0	0
ARPC2	actin related protein 2/3 complex subunit 2	intracellular,cytoplasm	6	0.089		0.207	0.0805095	2	#N/A		0.103		0.004		0.012		1	0	1	0	0
ARPC3	actin related protein 2/3 complex subunit 3	cytoplasm	1	0.104		0.14	0.0768152		#N/A		0.167	4	0.02		0.018		1	1	1	0	0
ATF1	activating transcription factor 1	nucleus	2	0.196		0.13	0.0890569	2	0.196		0.064		0.017		0.012		1	0	1	0	1
ATG3	Apg3p	cytoplasm	1	0.136		#N/A	0.0533718		#N/A		#N/A		#N/A		#N/A		0	0	0	0	0
ATP5C1	ATP synthase, H+ transporting, mitochondrial F1	cytoplasm	1	0.059		0.167	0.0707666		0.167		0.055		0.019		0.009		0	0	0	0	0
ATP5J2	ATP synthase, H+ transporting, mitochondrial F0	cytoplasm	1	0.091		0.16	0.0635066		#N/A		0.072		0.009		0.009		0	0	0	0	0
AV741821	AV741821 CB Homo sapiens cDNA clone CBLACB04 5', mRNA sequence.	intracellular	6	0.069		0.19	0.0671782		0.264		0.044		0.021		0.008		0	0	0	0	0
AW418496	ha19c01.x1 NCI_CGAP_Kid12 Homo sapiens cDNA clone IMAGE:2874144 3', mRNA sequence.	nucleus	2	0.107		0.347	0.0371704		0.119		0.077		0.015		0.01		0	0	0	0	0
AX748230	Homo sapiens cDNA FLJ36305 fis, clone THYMU2004677.	cytoplasm	1	0.154		0.174	0.0398182		0.2095		0.0605		0.02		0.0085		0	0	0	0	0
AY480055	Homo sapiens GKT-AML5-1 mRNA sequence; alternatively spliced.	unknown	9	0.059		0.1	0.0471672		0.316		0.053		0.029		0.008		0	0	0	0	0
BAG1	BCL2-associated athanogene.	plasma membrane,vesicle	7	0.318	1	0.169	0.0426227		0.243		0.148		0.053	5	0.013		1	1	1	0	0
BAG2	BCL2-associated athanogene 2	cytoplasm	1	0.1413		0.181	0.0522155		0.287		0.0805		0.0155		0.0085		0	0	0	0	1
BAG3	BCL2-associated athanogene 3	cytoplasm	1	0.356	1	#N/A	0.0700943		#N/A		#N/A		#N/A		#N/A		1	0	0	0	0
BANK1	B-cell scaffold protein with ankyrin repeats 1	unknown	9	0.088		0.217	0.0531019		0.241		0.062		0.008		0.01		0	0	0	0	0
BC039104	Homo sapiens hypothetical protein LOC283404, mRNA (cDNA clone IMAGE:4828118).	intracellular,cytoplasm	6	0.1853		0.133	0.0716056		0.2		0.0563		0.014		0.0073		0	0	0	0	0
BC042855	Homo sapiens mRNA; cDNA DKFZp434A0326 (from clone DKFZp434A0326).	intracellular,cytoplasm,plasma membrane	6	0.125		#N/A	0.0649668		#N/A		#N/A		#N/A		#N/A		0	0	0	0	0
BC044741	Homo sapiens cDNA clone IMAGE:4828106.	nucleus	2	0.181		0.117	0.0367167		0.226		0.093		0.014		0.011		0	0	0	0	0
BC048993	Homo sapiens hypothetical protein LOC285550, mRNA (cDNA clone IMAGE:4686377), partial cds.	cytoplasm	1	0.123		0.21	0.0818682	2	#N/A		0.156	4	0.006		0.015		1	1	1	0	0
BCCIP	BRCA2 and CDKN1A-interacting protein isoform C	intracellular,nucleus	6	0.587	1	#N/A	0.0936783	2	#N/A		#N/A		#N/A		#N/A		1	0	1	1	1
BE043072	ho32e06.x1 NCI_CGAP_Lu24 Homo sapiens cDNA clone IMAGE:3039106 3', mRNA sequence.	intracellular	6	0.095		0.17	0.0625933		0.355		0.113		0.01		0.009		0	0	0	0	0
BE048560	hr50f01.x1 NCI_CGAP_Kid11 Homo sapiens cDNA clone IMAGE:3131929 3' similar to contains Alu repetitive element;contains element TAR1 repetitive element ;, mRNA sequence.	nucleus	2	0.132		#N/A	0.0387823		#N/A		#N/A		#N/A		#N/A		0	0	0	0	0
BE785612	601475144F1 NIH_MGC_68 Homo sapiens cDNA clone IMAGE:3878051 5', mRNA sequence.	cytoplasm,pseudopodia/fillopodia	8	0.1523		0.084	0.0406479		0.406	3	0.0915		0.0085		0.011		1	1	1	0	0
BEST3	vitelliform macular dystrophy 2-like 3 isoform	cytoplasm,plasma membrane	9	0.078		#N/A	0.0297364		0.182		#N/A		#N/A		#N/A		0	0	0	0	0
BF062994	7h73f05.x1 NCI_CGAP_Co16 Homo sapiens cDNA clone IMAGE:3321633 3', mRNA sequence.	unknown	9	0.205		#N/A	0.0419075		#N/A		#N/A		#N/A		#N/A		0	0	0	0	0
BF594738	7o54h12.x1 NCI_CGAP_Kid11 Homo sapiens cDNA clone IMAGE:3577991 3', mRNA sequence.	nucleus,nuclear membrane	2	0.075		0.289	0.0286988		0.138		0.077		0.027		0.008		0	0	0	0	0
BF688062	602067272F1 NIH_MGC_57 Homo sapiens cDNA clone IMAGE:4066433 5', mRNA sequence.	intracellular	6	0.1695		#N/A	0.0273085		#N/A		#N/A		#N/A		#N/A		0	0	0	0	0
BG203790	RST23181 Athersys RAGE Library Homo sapiens cDNA, mRNA sequence.	intracellular,nucleus	6	0.125		0.23	0.0345445		0.347		0.118		0.011		0.013		0	0	0	0	0
BG221753	RST41568 Athersys RAGE Library Homo sapiens cDNA, mRNA sequence.	intracellular	6	0.121		0.117	0.0653127		0.122		0.093		0.018		0.013		0	0	0	0	0
BG505700	602549869F1 NIH_MGC_61 Homo sapiens cDNA clone IMAGE:4657624 5', mRNA sequence.	intracellular	6	0.078		#N/A	0.0662843		#N/A		#N/A		#N/A		#N/A		0	0	0	0	0
BI462136	603205131F1 NIH_MGC_97 Homo sapiens cDNA clone IMAGE:5270983 5', mRNA sequence.	nucleus	2	0.107		#N/A	0.0443915		#N/A		#N/A		#N/A		#N/A		0	0	0	0	0
BI762388	603049060F1 NIH_MGC_116 Homo sapiens cDNA clone IMAGE:5189054 5', mRNA sequence.	nucleus	2	0.08		0.177	0.0272293		0.299		0.148		0.02		0.015		0	0	0	0	0
BM461531	AGENCOURT_6421147 NIH_MGC_67 Homo sapiens cDNA clone IMAGE:5501266 5', mRNA sequence.	intracellular,nucleus	6	0.179		0.17	0.0388461		0.235		0.142		0.0095		0.0115		0	0	0	0	0
BM681834	UI-E-EJ0-aiq-g-07-0-UI.s1 UI-E-EJ0 Homo sapiens cDNA clone UI-E-EJ0-aiq-g-07-0-UI 3', mRNA sequence.	cytoplasm	1	0.364	1	0.18	0.162382	2	0.355		0.066		0.028		0.011		1	0	1	0	0
BM684766	UI-E-EJ1-ajj-m-22-0-UI.s1 UI-E-EJ1 Homo sapiens cDNA clone UI-E-EJ1-ajj-m-22-0-UI 3', mRNA sequence.	cytoplasm,plasma membrane	9	0.154		#N/A	#N/A		#N/A		#N/A		#N/A		#N/A		0	0	0	0	0
bpl 41-16	Homo sapiens olfactory receptor, family 7, subfamily E, member 47 pseudogene, mRNA (cDNA clone IMAGE:5590288).	intracellular	6	0.115		#N/A	0.049784		0.319		#N/A		#N/A		#N/A		0	0	0	0	0
BRMS1	breast cancer metastasis suppressor 1 isoform 2	endoplasmic reticulum	3	0.226		#N/A	0.0773955		#N/A		#N/A		#N/A		#N/A		0	0	0	0	1
BSG	basigin isoform 1	plasma membrane	7	0.083		#N/A	0.0525835		#N/A		#N/A		#N/A		#N/A		0	0	0	0	1
BTK	Homo sapiens Bruton's tyrosine kinase mRNA, complete cds.	cytoplasm,plasma membrane,nucleus	9	0.142		0.18	0.0811242	2	#N/A		0.078		0.016		0.007		1	0	1	0	1
BU568189	AGENCOURT_10404673 NIH_MGC_82 Homo sapiens cDNA clone IMAGE:6615135 5', mRNA sequence.	intracellular	6	0.132		0.127	0.0765986		#N/A		0.173	4	0.006		0.018		1	1	1	0	0
BU607353	UI-CF-FN0-aeu-g-14-0-UI.s1 UI-CF-FN0 Homo sapiens cDNA clone UI-CF-FN0-aeu-g-14-0-UI 3', mRNA sequence.	cytoplasm,plasma membrane,cytosole	9	0.249		0.077	0.106644	2	0.412	3	0.17	4	0.038		0.029	6	1	1	1	0	0
BU630466	UI-H-FL0-bdk-a-10-0-UI.s1 NCI_CGAP_FL0 Homo sapiens cDNA clone UI-H-FL0-bdk-a-10-0-UI 3', mRNA sequence.	cytoplasm	1	0.105		0.308	#N/A		#N/A		0.157	4	#N/A		0.009		1	1	1	0	0
BX090666	BX090666 Soares_testis_NHT Homo sapiens cDNA clone IMAGp998D014412 ; IMAGE:1736400 5', mRNA sequence.	intracellular	6	0.06		0.23	0.0471795		0.359		0.08		0.021		0.004		0	0	0	0	0
BX100818	BX100818 Soares_fetal_lung_NbHL19W Homo sapiens cDNA clone IMAGp998J074430 ; IMAGE:1743462 5', mRNA sequence.	cytoplasm	1	0.032		0.16	0.0452729		0.227		0.024		0.02		0.007		0	0	0	0	0
BX104605	BX104605 Soares_testis_NHT Homo sapiens cDNA clone IMAGp998B211795 ; IMAGE:731444 5', mRNA sequence.	intracellular,cytoplasm	6	0.131		0.113	0.0580829		0.248		0.157	4	0.0105		0.019		1	1	1	0	0
BX537644	Homo sapiens cDNA: FLJ23130 fis, clone LNG08419.	intracellular,cytoplasm	6	0.095		0.177	0.0603714		#N/A		0.071		0.011		0.007		0	0	0	0	0
C12orf45	hypothetical protein LOC121053	nucleus	2	0.171		0.15	0.038036		0.303		0.083		0.008		0.009		0	0	0	0	0
C14orf112	hypothetical protein LOC51241	cytoplasm,plasma membrane	9	0.066		0.19	0.0322004		0.282		#N/A		#N/A		#N/A		0	0	0	0	0
C14orf166	homeobox prox 1	intracellular	6	0.112		#N/A	0.0534913		#N/A		#N/A		#N/A		#N/A		0	0	0	0	0
C14orf2	hypothetical protein LOC9556	cytoplasm	1	0.118		0.305	0.0862263	2	#N/A		0.085		0.013		0.006		1	0	1	0	0
C19orf43	hypothetical protein MGC2803	intracellular	6	0.325	1	0.14	0.0653144		0.234		0.189	4	0.013		0.022	6	1	1	1	0	0
c19orf53	hypothetical protein LOC28974	nucleus	2	0.158		0.09	0.0568347		#N/A		0.167	4	0.046		0.043	6	1	1	1	0	0
C1orf121	hypothetical protein LOC51029	cytoplasm	1	0.169		#N/A	0.119654	2	#N/A		#N/A		#N/A		#N/A		1	0	1	0	0
C1QBP	complement component 1, q subcomponent binding	mitochondrion	5	0.1843		0.15	0.115224	2	0.207		0.094		0.0105		0.009		1	0	1	0	0
c21orf59	Homo sapiens T-complex protein 10A-2 mRNA, complete cds.	cytoplasm	1	0.132		#N/A	0.0802536	2	#N/A		0.2	4	0.008		0.022	6	1	1	1	0	0
C22orf16	chromosome 22 open reading frame 16	cytoplasm	1	0.077		0.15	0.0637826		#N/A		0.11		0.009		0.016		0	0	0	0	0
C2orf25	hypothetical protein LOC27249	cytoplasm	1	0.08		0.107	0.033842		0.276		0.079		0.009		0.006		0	0	0	0	0
C3ORF19	hypothetical protein LOC51244	nucleus	2	0.079		0.24	0.0406037		0.213		0.074		0.014		0.01		0	0	0	0	0
C7orf11	chromosome 7 open reading frame 11	nucleus,nuclear bodies	2	0.104		0.12	0.0368548		0.146		0.08		0.018		0.01		0	0	0	0	1
C8orf53	hypothetical protein LOC84294	intracellular	6	0.195		0.147	0.0237824		0.178		0.079		0.016		0.012		0	0	0	0	0
C9orf40	hypothetical protein LOC55071	cytoplasm	1	0.0935		0.09	0.050716		#N/A		0.12		0.014		0.011		0	0	0	0	0
CA418524	UI-H-EZ1-bbd-m-02-0-UI.s1 NCI_CGAP_Ch2 Homo sapiens cDNA clone UI-H-EZ1-bbd-m-02-0-UI 3', mRNA sequence.	nucleus	2	0.192		#N/A	0.0366573		#N/A		#N/A		#N/A		#N/A		0	0	0	0	0
CA430002	UI-H-FH1-bfp-h-24-0-UI.s1 NCI_CGAP_FH1 Homo sapiens cDNA clone UI-H-FH1-bfp-h-24-0-UI 3', mRNA sequence.	Golgi	4	0.136		0.257	0.0697783		0.332		0.12		0.011		0.018		0	0	0	0	0
CACNA2D1	calcium channel, voltage-dependent, alpha	cytoplasm	1	0.465	1	#N/A	0.0345214		#N/A		#N/A		#N/A		#N/A		1	0	0	0	0
CACYBP	calcyclin binding protein isoform 2	cytoplasm	1	0.121		0.43	0.102291	2	#N/A		0.211	4	0.017		0.02		1	1	1	0	0
CALD1	NAG22 protein.	cytoskeleton	9	0.176		0.247	0.0830068	2	#N/A		0.404	4	0.053	5	0.066	6	1	1	1	0	0
CALM1	calmodulin 1	cytoplasm	1	0.109		0.143	0.0448862		0.315		0.1596	4	0.0184		0.0154		1	1	1	0	1
CALM2	calmodulin 2	cytoplasm,plasma membrane	9	0.225		0.207	0.0536349		0.19		0.049		0.017		0.012		0	0	0	0	0
CAST	calpastatin isoform a	cytoplasm	1	0.087		0.1	0.0535279		#N/A		0.089		0.007		0.016		0	0	0	0	1
CAV1	caveolin 1	cytoplasm,Golgi,plasma membrane	4	0.2275		0.05	0.05053		0.224		0.103		0.015		0.0125		0	0	0	0	1
CB045860	NISC_gf01a03.x1 NCI_CGAP_Kid12 Homo sapiens cDNA clone IMAGE:3252364 3', mRNA sequence.	cytoplasm	1	0.052		0.227	0.0710465		0.198		0.058		0.01		0.009		0	0	0	0	0
CB046508	NISC_gf05a01.x1 NCI_CGAP_Kid12 Homo sapiens cDNA clone IMAGE:3252744 3', mRNA sequence.	nucleus	2	0.213		#N/A	0.102802	2	#N/A		#N/A		#N/A		#N/A		1	0	1	0	0
CB155900	K-EST0214495 L17N670205n1 Homo sapiens cDNA clone L17N670205n1-1-A03 5', mRNA sequence.	intracellular,nucleus	6	0.315	1	0.06	0.0300737		0.146		0.087		0.011		0.012		1	0	0	0	0
CBWD5	COBW domain-containing protein 5	intracellular,cytoplasm,nucleus	6	0.133		#N/A	0.0728873		#N/A		#N/A		#N/A		#N/A		0	0	0	0	0
CCDC12	coiled-coil domain containing 12	nucleus	2	0.137		0.15	0.0326035		0.315		0.099		0.008		0.008		0	0	0	0	0
CCDC23	coiled-coil domain containing 23	intracellular	6	0.07		0.184	0.0616412		0.146		0.054		0.013		0.004		0	0	0	0	0
CCDC50	Ymer protein long isoform	cytoplasm	1	0.13		0.19	0.0656734		#N/A		0.163	4	0.008		0.019		1	1	1	0	0
CCDC72	coiled-coil domain containing 72	intracellular	6	0.097		0.37	0.0494359		0.196		0.067		0.026		0.008		0	0	0	0	0
CCDC74A	coiled-coil domain containing 74A	nucleus	2	0.164		0.4	0.020195		0.248		0.138		0.015		0.013		0	0	0	0	0
CD164	CD164 antigen, sialomucin	endoplasmic reticulum,plasma membrane	3	0.087		0.127	0.102777	2	#N/A		0.042		0.01		0.006		1	0	1	0	0
CD2AP	CD2-associated protein	cytoplasm	1	0.048		0.12	0.09182	2	#N/A		0.208	4	0.019		0.028	6	1	1	1	1	1
CD44	CD44 antigen isoform 1 precursor	Golgi,plasma membrane	4	0.2237		0.19	#N/A		0.2283		0.1287		0.0107		0.0117		0	0	0	0	1
CD63	CD63 antigen isoform A	cytoplasm,lysosome,nucleus	9	0.073		0.237	0.0607345		0.244		0.094		0.015		0.008		0	0	0	0	1
CD641745	AGENCOURT_14537497 NIH_MGC_191 Homo sapiens cDNA clone IMAGE:30416477 5', mRNA sequence.	intracellular	6	0.045		0.36	0.0425323		#N/A		0.087		0.009		0.011		0	0	0	0	0
CD692919	EST9442 human nasopharynx Homo sapiens cDNA, mRNA sequence.	Golgi,plasma membrane	4	0.103		0.08	0.0358648		0.308		0.098		0.009		0.011		0	0	0	0	0
CDADC1	cytidine and dCMP deaminase domain containing 1	cytoplasm	1	0.27		0.187	0.129695	2	#N/A		0.154	4	0.014		0.024	6	1	1	1	0	0
CDKN3	cyclin-dependent kinase inhibitor 3	cytoplasm	1	0.356	1	0.297	0.0528663		#N/A		0.117		0.03		0.029	6	1	1	1	1	1
CHCHD2	coiled-coil-helix-coiled-coil-helix domain	intracellular	6	0.056		0.33	0.056055		#N/A		0.071		0.019		0.005		0	0	0	0	0
CHORDC1	cysteine and histidine-rich domain	cytoplasm	1	0.386	1	0.54	0.0900297	2	#N/A		0.071		0.1055	5	0.0165		1	1	1	0	0
CHURC1	churchill domain containing 1	cytoplasm	1	0.184		#N/A	0.0618128		#N/A		0.202	4	#N/A		0.024	6	1	1	1	0	0
CIP29	cytokine induced protein 29 kDa	nucleus	2	0.17		#N/A	0.0541627		#N/A		#N/A		#N/A		#N/A		0	0	0	0	0
CIRBP	cold inducible RNA binding protein	nucleus	2	0.212		0.367	#N/A		0.403	3	0.159	4	0.022		0.014		1	1	1	0	0
CIRH1A	cirhin	nucleus	2	0.13		0.22	0.0191776		0.482	3	0.093		0.014		0.01		1	1	1	0	0
CISD1	CDGSH iron sulfur domain 1	cytoplasm	1	0.181		#N/A	0.0733963		#N/A		#N/A		#N/A		#N/A		0	0	0	0	0
CK126027	AGENCOURT_16510969 NIH_MGC_239 Homo sapiens cDNA clone IMAGE:30710070 5', mRNA sequence.	cytoplasm	1	0.079		0.44	0.102989	2	#N/A		0.126		0.013		0.013		1	0	1	0	0
CKS2	CDC28 protein kinase 2	cytoplasm	1	0.376	1	0.235	0.0468684		#N/A		0.1155		0.0215		0.011		1	0	0	1	1
CLCN3	chloride channel 3 isoform e	endoplasmic reticulum	3	0.08		0.27	0.0325723		#N/A		0.229	4	0.056	5	0.024	6	1	1	1	0	0
CLIC1	chloride intracellular channel 1	intracellular	6	0.259		#N/A	0.0805803	2	#N/A		#N/A		#N/A		#N/A		1	0	1	0	1
CLIC4	chloride intracellular channel 4	plasma membrane	7	0.153		0.08	0.0828725	2	#N/A		0.174	4	0.011		0.02		1	1	1	0	0
CLINT1	epsin 4	cytoplasm	1	0.225		0.174	0.107722	2	#N/A		0.069		0.046		0.021	6	1	1	1	0	1
CLPTM1	cleft lip and palate associated transmembrane	Golgi,plasma membrane	4	0.207		0.06	0.0367651		0.216		0.044		0.021		0.007		0	0	0	0	0
CN267986	17000531863184 GRN_EB Homo sapiens cDNA 5', mRNA sequence.	intracellular	6	0.253		#N/A	0.103712	2	#N/A		#N/A		#N/A		#N/A		1	0	1	0	0
CN398253	17000424721764 GRN_EB Homo sapiens cDNA 5', mRNA sequence.	cytoplasm	1	0.168		#N/A	0.0776954		#N/A		#N/A		#N/A		#N/A		0	0	0	0	0
CNN3	calponin 3	cytoplasm,nucleus	9	0.03		0.2	0.0583611		#N/A		0.123		0.02		0.005		0	0	0	0	0
COPS6	COP9 signalosome subunit 6	nucleus	2	0.148		0.343	0.0306876		0.304		0.141		0.016		0.014		0	0	0	0	1
COTL1	coactosin-like 1	cytoplasm	1	0.2505		0.257	#N/A		#N/A		0.04		0.013		0.003		0	0	0	0	0
COX17	COX17 homolog, cytochrome c oxidase assembly	cytoplasm	1	0.155		0.17	0.0757512		#N/A		0.14		0.028		0.007		0	0	0	0	0
COX7C	cytochrome c oxidase subunit VIIc precursor	mitochondrion	5	0.333	1	0.286	#N/A		0.336		0.204	4	0.011		0.019		1	1	1	0	0
CR593740	Homo sapiens cDNA clone IMAGE:4823412.	intracellular	6	0.189		0.26	0.07692		#N/A		#N/A		#N/A		#N/A		0	0	0	0	0
CR623475	Homo sapiens cDNA: FLJ21942 fis, clone HEP04527.	intracellular	6	0.094		0.201	0.06162		0.253		0.112		0.017		0.011		0	0	0	0	0
CR627148	Homo sapiens, clone IMAGE:5213378, mRNA.	cytoplasm	1	0.083		0.447	0.032388		0.273		0.045		0.015		0.007		0	0	0	0	0
CR737784	CR737784 Homo sapiens library (Ebert L) Homo sapiens cDNA clone IMAGp998C154208 ; IMAGE:1658054 5', mRNA sequence.	cytoplasm	1	0.236		0.387	0.0538665		#N/A		0.046		0.018		0.003		0	0	0	0	0
CRKL	v-crk sarcoma virus CT10 oncogene homolog	plasma membrane	7	0.292		0.178	0.0680639		#N/A		0.111		0.014		0.017		0	0	0	0	0
CSNK1A1	casein kinase 1, alpha 1 isoform 2	cytoplasm,pseudopodia/fillopodia	8	0.215		#N/A	0.070482		#N/A		#N/A		#N/A		#N/A		0	0	0	1	1
CSTF3	cleavage stimulation factor subunit 3 isoform 1	nucleus	2	0.082		#N/A	0.0963123	2	#N/A		#N/A		#N/A		#N/A		1	0	1	0	1
DA336829	DA336829 BRHIP3 Homo sapiens cDNA clone BRHIP3037522 5', mRNA sequence.	nucleus,nucleolus	2	0.146		0.21	0.0394023		0.12		0.077		0.029		0.008		0	0	0	0	0
DA697821	DA697821 NT2NE2 Homo sapiens cDNA clone NT2NE2019092 5', mRNA sequence.	intracellular,cytoplasm	6	0.096		0.137	0.0476806		0.214		0.074		0.013		0.008		0	0	0	0	0
DAD1	defender against cell death 1	cytoplasm,nucleus	9	0.178		0.12	0.0373787		0.249		0.095		0.031		0.016		0	0	0	0	0
DAP	death-associated protein	intracellular,cytoplasm	6	0.195		0.26	0.0765768		#N/A		0.192	4	0.015		0.02		1	1	1	0	0
DAZAP2	DAZ associated protein 2	cytoplasm,nucleus	9	0.056		0.137	0.0696737		0.337		0.087		0.034		0.016		0	0	0	0	0
DB049861	DB049861 TESTI2 Homo sapiens cDNA clone TESTI2039270 5', mRNA sequence.	cytoplasm	1	0.099		0.247	0.0572793		#N/A		0.081		0.012		0.008		0	0	0	0	0
DB054822	DB054822 TESTI2 Homo sapiens cDNA clone TESTI2045843 5', mRNA sequence.	cytoplasm	1	0.594	1	0.09	0.173265	2	#N/A		#N/A		#N/A		#N/A		1	0	1	0	0
DB331110	DB331110 SKMUS2 Homo sapiens cDNA clone SKMUS2008761 3', mRNA sequence.	nucleus	2	0.157		#N/A	0.0264411		#N/A		#N/A		#N/A		#N/A		0	0	0	0	0
DB344099	DB344099 THYMU2 Homo sapiens cDNA clone THYMU2032116 3', mRNA sequence.	nucleolus	2	0.209		0.09	0.0297156		0.422	3	0.282	4	0.05		0.028	6	1	1	1	0	0
DB478885	DB478885 RIKEN full-length enriched human cDNA library, hippocampus Homo sapiens cDNA clone H023080L11 5', mRNA sequence.	nucleus	2	0.326	1	#N/A	0.0498204		#N/A		#N/A		#N/A		#N/A		1	0	0	0	0
DB514539	DB514539 RIKEN full-length enriched human cDNA library, testis Homo sapiens cDNA clone H013041M08 3', mRNA sequence.	intracellular	6	0.096		#N/A	0.104244	2	#N/A		#N/A		#N/A		#N/A		1	0	1	0	0
DB522524	DB522524 RIKEN full-length enriched human cDNA library, testis Homo sapiens cDNA clone H013076C14 3', mRNA sequence.	cytoplasm	1	0.047		0.217	0.0686517		#N/A		0.117		0.01		0.009		0	0	0	0	0
DC347972	DC347972 CTONG3 Homo sapiens cDNA clone CTONG3005404 5', mRNA sequence.	intracellular,cytoplasm,nucleus	6	0.157		0.09	0.0557415		0.4165	3	0.055		0.015		0.0105		1	1	1	0	0
DCBLD2	discoidin, CUB and LCCL domain containing 2	plasma membrane	7	0.281		0.12	0.0739292		#N/A		0.069		0.017		0.016		0	0	0	0	0
DDEF2	development- and differentiation-enhancing	cytoplasm	1	0.185		0.07	0.0385618		#N/A		0.083		0.007		0.015		0	0	0	0	0
DDT	D-dopachrome tautomerase	cytoplasm	1	0.094		0.277	0.0491857		0.368		0.077		0.016		0.004		0	0	0	0	0
DDX10	DEAD (Asp-Glu-Ala-Asp) box polypeptide 10	cytoplasm,nucleus,nucleolus	9	0.054		0.07	0.0316835		0.147		0.036		0.011		0.005		0	0	0	0	0
DDX18	DEAD (Asp-Glu-Ala-Asp) box polypeptide 18	nucleus,nucleolus	2	0.214		0.109	0.0251599		0.3185		0.1705	4	0.0218		0.0182		1	1	1	0	1
DDX46	DEAD (Asp-Glu-Ala-Asp) box polypeptide 46	nucleus	2	0.1115		0.089	0.0368121		0.168		0.0365		0.01		0.006		0	0	0	0	0
DDX5	DEAD (Asp-Glu-Ala-Asp) box polypeptide 5	nucleus,nucleolus	2	0.1804		0.242	0.0144619		0.2511		0.1284		0.0154		0.0124		0	0	0	0	0
DEK	DEK oncogene	nucleus	2	0.1435		0.19	0.0521626		0.189		0.1085		0.0195		0.009		0	0	0	0	0
DHX15	DEAH (Asp-Glu-Ala-His) box polypeptide 15	nucleus	2	0.1573		0.24	0.0244088		0.338		0.072		0.006		0.007		0	0	0	0	0
DHX16	DEAH (Asp-Glu-Ala-His) box polypeptide 16	nucleus	2	0.108		0.12	0.0233233		0.148		0.051		0.005		0.008		0	0	0	0	0
DKKL1	dickkopf-like 1 (soggy) precursor	endoplasmic reticulum,nuclear membrane	3	0.185		0.16	0.135952	2	#N/A		0.174	4	0.013		0.012		1	1	1	0	0
DMTF1	cyclin D binding myb-like transcription factor	nucleus	2	0.252		0.287	0.0671955		0.244		0.108		0.006		0.013		0	0	0	1	1
DNAJA1	DnaJ (Hsp40) homolog, subfamily A, member 1	cytoplasm,plasma membrane	9	0.052		0.1	0.0689697		0.214		0.086		0.011		0.011		0	0	0	0	0
DNAjC7	DnaJ (Hsp40) homolog, subfamily C, member 7	cytoplasm,nucleus	9	0.197		0.157	0.0972607	2	#N/A		0.202	4	0.033		0.038	6	1	1	1	0	1
DNMT1	DNA (cytosine-5-)-methyltransferase 1	nucleus	2	0.1893		0.118	0.0231508		0.261		0.1083		0.008		0.0093		0	0	0	0	1
DYNC1H1	dynein, cytoplasmic, heavy polypeptide 1	intracellular,cytoplasm	6	0.131		#N/A	0.0553626		#N/A		#N/A		#N/A		#N/A		0	0	0	1	1
EED	embryonic ectoderm development isoform a	nucleus	2	0.13		0.127	0.0504199		0.354		0.098		0.011		0.009		0	0	0	0	0
EEF1A1	eukaryotic translation elongation factor 1 alpha	cytoplasm	1	0.3375	1	0.293	0.0772218		0.225		0.234	4	0.0145		0.014		1	1	1	0	0
EEF1E1	eukaryotic translation elongation factor 1	cytoplasm,nucleus	9	0.212		0.204	0.0492969		0.211		0.192	4	0.0185		0.0135		1	1	1	0	0
EEF2	eukaryotic translation elongation factor 2	cytoplasm	1	0.401	1	0.194	#N/A		0.3865		0.182	4	0.0105		0.0115		1	1	1	0	1
EIF1AX	X-linked eukaryotic translation initiation	intracellular	6	0.06		0.487	0.0478174		#N/A		0.085		0.011		0.009		0	0	0	0	0
EIF2S2	eukaryotic translation initiation factor 2 beta	cytoplasm	1	0.146		0.11	#N/A		0.429	3	0.1455		0.013		0.007		1	1	1	0	1
EIF2S3	eukaryotic translation initiation factor 2,	cytoplasm,nucleus	9	0.2097		0.097	0.0556203		0.2235		0.146		0.0165		0.0135		0	0	0	0	0
EIF3K	eukaryotic translation initiation factor 3,	nucleus	2	0.1382		#N/A	0.0466996		0.2535		#N/A		#N/A		#N/A		0	0	0	0	0
EIF3S10	eukaryotic translation initiation factor 3,	cytoplasm	1	0.208		#N/A	0.145833	2	#N/A		0.0575		0.0385		0.0075		1	0	1	0	0
EIF4A1	eukaryotic translation initiation factor 4A	cytoplasm,nucleus	9	0.141		0.17	0.0782955		0.344		0.1457		0.0117		0.009		0	0	0	0	0
EIF4E	eukaryotic translation initiation factor 4E	cytoplasm	1	0.153		0.19	#N/A		#N/A		0.208	4	0.008		0.011		1	1	1	1	1
EIF4E2	eukaryotic translation initiation factor 4E	intracellular	6	0.492	1	0.547	0.0534492		#N/A		#N/A		#N/A		#N/A		1	0	0	0	0
EIF4EBP1	eukaryotic translation initiation factor 4E	intracellular	6	0.143		0.159	0.0869955	2	#N/A		0.184	4	0.016		0.0165		1	1	1	1	1
EIF4G3	eukaryotic translation initiation factor 4	cytoplasm	1	0.205		0.25	#N/A		#N/A		0.162	4	0.007		0.023	6	1	1	1	1	0
EIF4H	eukaryotic translation initiation factor 4H	cytoplasm	1	0.1647		#N/A	0.0586061		0.531	3	0.242	4	0.019		0.009		1	1	1	0	0
EIF5B	eukaryotic translation initiation factor 5B	intracellular,cytoplasm	6	0.254		0.187	0.0574324		0.319		0.2347	4	0.013		0.014		1	1	1	0	1
ENO1	enolase 1	cytoplasm,nucleus	9	0.1385		0.198	0.0506042		0.386		0.1062		0.0124		0.0116		0	0	0	0	1
FABP5	fatty acid binding protein 5	intracellular,cytoplasm,nucleus	6	0.067		0.192	0.0686442		#N/A		0.1025		0.017		0.008		0	0	0	0	0
FAM128A	Homo sapiens family with sequence similarity 128, member A, mRNA (cDNA clone MGC:8772 IMAGE:3862861), complete cds.	cytoplasm	1	0.181		0.25	0.0176566		0.158		0.121		0.016		0.012		0	0	0	0	0
FAM44A	hypothetical protein LOC259282	cytoplasm	1	0.441	1	#N/A	0.112864	2	#N/A		#N/A		#N/A		#N/A		1	0	1	0	0
FAM86A	hypothetical protein LOC196483 isoform 1	cytoplasm	1	0.07		#N/A	0.0880666	2	#N/A		0.294	4	0.019		0.038	6	1	1	1	0	0
FAU	ubiquitin-like protein fubi and ribosomal	nucleus,nucleolus	2	0.1538		0.063	0.0569611		0.3818		0.102		0.021		0.013		0	0	0	0	1
FER1L3	myoferlin isoform a	plasma membrane,nuclear membrane	7	0.133		0.207	0.0918204	2	0.309		0.084		0.139	5	0.013		1	1	1	0	0
FLJ10986	Homo sapiens cDNA FLJ10986 fis, clone PLACE1001869, weakly similar to L-RIBULOKINASE (EC 2.7.1.16).	unknown	9	0.229		#N/A	#N/A		#N/A		#N/A		#N/A		#N/A		0	0	0	0	0
FLJ20105	hypothetical protein LOC54821 isoform a	intracellular,cytoplasm	6	0.079		0.09	0.0599988		#N/A		0.133		0.038		0.029	6	1	1	1	0	0
FLJ20674	hypothetical protein LOC54621	plasma membrane	7	0.116		0.13	0.108372	2	#N/A		0.2	4	0.02		0.012		1	1	1	0	0
FLJ21908	hypothetical protein LOC79657	nucleus,nuclear bodies	2	0.074		#N/A	0.0483561		0.612	3	#N/A		#N/A		#N/A		1	1	1	0	0
FLJ31951	hypothetical protein LOC153830	cytoplasm	1	0.106		0.12	0.123248	2	0.392		0.293	4	0.005		0.028	6	1	1	1	0	0
FLNB	filamin B, beta (actin binding protein 278)	cytoplasm	1	0.3	1	#N/A	0.0991041	2	#N/A		#N/A		#N/A		#N/A		1	0	1	0	0
FOSL1	FOS-like antigen 1	cytoplasm,nucleus	9	0.275		#N/A	0.0424982		#N/A		#N/A		#N/A		#N/A		0	0	0	0	1
FSCN1	fascin 1	cytoplasm,pseudopodia/fillopodia	8	0.1495		0.06	0.0666438		0.194		0.125		0.018		0.0155		0	0	0	0	0
FUBP1	far upstream element-binding protein	nucleus	2	0.147		#N/A	0.0652677		0.3		0.122		0.012		0.019		0	0	0	0	0
GABARAP	GABA(A) receptor-associated protein	intracellular	6	0.051		0.12	0.0460603		#N/A		#N/A		#N/A		#N/A		0	0	0	0	0
GALNT2	polypeptide N-acetylgalactosaminyltransferase 2	Golgi	4	0.114		0.3	0.114845	2	#N/A		0.456	4	0.016		0.038	6	1	1	1	0	0
GAP43	growth associated protein 43	cytoplasm	1	0.547	1	#N/A	0.084305	2	#N/A		#N/A		#N/A		#N/A		1	0	1	0	1
GLO1	glyoxalase I	intracellular	6	0.171		0.297	0.0445775		0.293		0.025		0.023		0.006		0	0	0	0	1
GLRX	glutaredoxin (thioltransferase)	intracellular	6	0.055		0.18	0.0604308		#N/A		0.144		0.016		0.012		0	0	0	0	0
GMNN	geminin	nucleus	2	0.641	1	0.29	#N/A		#N/A		#N/A		#N/A		#N/A		1	0	0	1	1
GNB2L1	guanine nucleotide binding protein (G protein),	intracellular,cytoplasm,plasma membrane	6	0.0915		0.18	0.0673138		0.395		0.112		0.018		0.008		0	0	0	1	1
GNG11	guanine nucleotide binding protein gamma 11	cytoplasm,plasma membrane	9	0.363	1	#N/A	0.117701	2	#N/A		#N/A		#N/A		#N/A		1	0	1	0	0
GSPT1	G1 to S phase transition 1	cytoplasm	1	0.163		0.07	0.0617447		0.249		0.07		0.016		0.01		0	0	0	1	1
GTF2F2	general transcription factor IIF, polypeptide 2	nucleus,nucleolus	2	0.0963		0.085	0.0648358		0.465	3	0.1287		0.0423		0.0183		1	1	1	0	0
H2AFV	H2A histone family, member V isoform 2	nucleus	2	0.099		0.124	#N/A		0.259		0.065		0.0195		0.007		0	0	0	0	0
HAT1	histone acetyltransferase 1 isoform a	nucleus	2	0.1135		0.159	0.0675091		0.214		0.088		0.0195		0.011		0	0	0	0	0
HDAC2	histone deacetylase 2	cytoplasm,nucleus	9	0.1869		0.187	0.0686106		0.444	3	0.1059		0.015		0.009		1	1	1	0	1
hK2	hexokinase 2	mitochondrion	5	0.135		0.177	#N/A		0.144		0.087		0.011		0.01		0	0	0	0	0
HMG2L1	high-mobility group protein 2-like 1 isoform b	nucleus	2	0.149		0.087	0.0440123		0.362		0.108		0.068	5	0.01		1	1	1	0	0
HMGA1	high mobility group AT-hook 1 isoform a	nucleus	2	0.09		#N/A	#N/A		#N/A		#N/A		#N/A		#N/A		0	0	0	0	0
HMGA2	high mobility group AT-hook 2 isoform a	nucleus	2	0.199		#N/A	0.0215677		#N/A		#N/A		#N/A		#N/A		0	0	0	1	1
HMGB1	High-mobility group box 1.	nucleus	2	0.148		0.32	0.0911971	2	#N/A		0.168	4	0.015		0.011		1	1	1	0	1
HMGN2	high-mobility group nucleosomal binding domain	nucleus	2	0.156		0.079	0.0326702		0.1835		0.0475		0.0135		0.0075		0	0	0	0	1
HMGN3	high mobility group nucleosomal binding domain 3	nucleus	2	0.157		0.12	0.0516189		0.247		0.098		0.015		0.012		0	0	0	0	0
HMMR	hyaluronan-mediated motility receptor isoform a	intracellular	6	0.179		#N/A	0.0176936		#N/A		#N/A		#N/A		#N/A		0	0	0	0	1
HN1	hematological and neurological expressed 1	nucleus,nucleolus	2	0.1305		#N/A	0.0954717	2	#N/A		0.169	4	0.0155		0.016		1	1	1	0	0
HNRPA1	heterogeneous nuclear ribonucleoprotein A1	nucleus	2	0.128		0.25	0.0200489		0.289		0.144		0.011		0.013		0	0	0	0	0
HNRPA2B1	heterogeneous nuclear ribonucleoprotein A2/B1	nucleus	2	0.049		0.477	0.0178731		0.13		0.082		0.016		0.01		0	0	0	0	0
HNRPA3	heterogeneous nuclear ribonucleoprotein A3	nucleus	2	0.071		#N/A	0.0247498		0.245		0.114		0.025		0.011		0	0	0	0	0
HNRPC	Homo sapiens mRNA for Heterogeneous nuclear ribonucleoproteins C1/C2 variant protein.	nucleus	2	0.09		#N/A	0.0275901		0.3		#N/A		#N/A		#N/A		0	0	0	0	0
HNRPD	heterogeneous nuclear ribonucleoprotein D	nucleus	2	0.345	1	0.48	0.0718863		#N/A		#N/A		#N/A		#N/A		1	0	0	0	0
HNRPM	heterogeneous nuclear ribonucleoprotein M	nucleus	2	0.078		0.187	0.0318617		#N/A		0.032		0.012		0.006		0	0	0	0	0
HSP90AA1	heat shock protein 90kDa alpha (cytosolic),	cytoplasm,nucleus	9	0.1386		0.123	0.0541212		0.1995		0.06		0.017		0.0058		0	0	0	1	1
HSP90AB1	heat shock 90kDa protein 1, beta	cytoplasm	1	0.435	1	0.155	0.0499245		0.198		0.236	4	0.0275		0.0195		1	1	1	0	1
HSPA4L	heat shock 70kDa protein 4-like	intracellular	6	0.36	1	#N/A	#N/A		#N/A		#N/A		#N/A		#N/A		1	0	0	0	0
HSPCA	heat shock protein 90kDa alpha (cytosolic),	cytoplasm	1	0.2873		0.087	0.0630393		0.2695		0.0893		0.015		0.0077		0	0	0	0	0
HSPH1	heat shock 105kD	cytoplasm	1	0.4115	1	0.18	#N/A		#N/A		0.124		0.011		0.01		1	0	0	0	0
HYPA	Hypothetical protein (Fragment).	nucleus	2	0.072		0.23	0.0191112		0.43	3	0.148		0.014		0.016		1	1	1	0	0
IFT20	intraflagellar transport protein IFT20	Golgi	4	0.301	1	#N/A	0.0916602	2	#N/A		#N/A		#N/A		#N/A		1	0	1	0	0
IL3RA	interleukin 3 receptor, alpha precursor	plasma membrane	7	0.1063		0.27	0.0424795		0.307		0.1097		0.013		0.0087		0	0	0	0	1
ILF2	interleukin enhancer binding factor 2	nucleus,nucleolus	2	0.1405		0.093	0.0394382		0.1795		0.102		0.025		0.0125		0	0	0	0	0
INPP4B	inositol polyphosphate-4-phosphatase, type II,	cytoplasm	1	0.041		0.247	0.0432614		0.402	3	0.038		0.017		0.004		1	1	1	0	0
ISOC1	isochorismatase domain containing 1	cytoplasm	1	0.086		0.341	0.0710153		#N/A		0.123		0.014		0.012		0	0	0	0	0
JAGN1	jagunal homolog 1	cytoplasm,endoplasmic reticulum	3	0.171		#N/A	0.12518	2	#N/A		0.111		0.021		0.021	6	1	1	1	0	0
KATNA1	katanin p60 subunit A 1	cytoplasm,plasma membrane	9	0.195		#N/A	0.099077	2	#N/A		#N/A		#N/A		#N/A		1	0	1	1	1
KIAA0802	hypothetical protein LOC23255	intracellular	6	0.058		0.457	0.0270783		0.37		0.103		0.01		0.016		0	0	0	0	0
KIAA1430	KIAA1430 protein (Fragment).	nucleus	2	0.184		#N/A	0.0448526		#N/A		#N/A		#N/A		#N/A		0	0	0	0	0
KLHL31	kelch repeat and BTB (POZ) domain containing 1	nucleus	2	0.179		0.19	0.0234876		0.287		0.092		0.009		0.012		0	0	0	0	0
LARP1	la related protein isoform 2	cytoplasm	1	0.286		#N/A	0.0926011	2	#N/A		#N/A		#N/A		#N/A		1	0	1	0	0
LETM2	leucine zipper-EF-hand containing transmembrane	intracellular	6	0.051		0.197	0.0289988		0.1		0.069		0.014		0.009		0	0	0	0	0
LGALS1	beta-galactoside-binding lectin precursor	intracellular	6	0.295		0.2	0.0579531		#N/A		0.038		0.014		0.005		0	0	0	0	1
LIMA1	epithelial protein lost in neoplasm beta	cytoplasm,cytoskeleton	9	0.125		0.137	0.0415266		0.206		0.097		0.012		0.007		0	0	0	0	1
LMNA	lamin A/C isoform 2	nucleus	2	0.181		0.348	0.0587206		0.266		0.098		0.0155		0.0095		0	0	0	0	1
LOC283551	hypothetical protein LOC283551	cytoplasm,nucleus	9	0.212		#N/A	#N/A		#N/A		#N/A		#N/A		#N/A		0	0	0	0	0
LOC284184	Homo sapiens full length insert cDNA clone ZD54C08.	intracellular	6	0.101		0.15	0.0679468		#N/A		0.103		0.019		0.008		0	0	0	0	0
LOC441161	hypothetical LOC441161	Golgi	4	0.118		0.11	0.0346284		0.168		0.055		0.007		0.008		0	0	0	0	0
LOC728776	hypothetical protein LOC728776	nucleus	2	0.201		#N/A	0.0305145		0.114		#N/A		#N/A		#N/A		0	0	0	0	0
LONRF3	LON peptidase N-terminal domain and ring finger	intracellular	6	0.152		0.144	0.0368685		#N/A		0.215	4	0.022		0.023	6	1	1	1	0	0
LOXL2	lysyl oxidase-like 2 precursor	intracellular,cytoplasm,endoplasmic reticulum	6	0.07		0.07	0.0746788		0.248		0.089		0.039		0.01		0	0	0	0	0
LPIN2	lipin 2	nucleus	2	0.104		#N/A	0.0328127		#N/A		#N/A		0.015		0.012		0	0	0	0	0
LRRC59	leucine rich repeat containing 59	endoplasmic reticulum	3	0.417	1	0.12	0.10167	2	0.229		0.085		0.019		0.014		1	0	1	0	0
LRRFIP1	leucine rich repeat (in FLII) interacting	cytoplasm	1	0.057		0.284	0.110338	2	#N/A		0.155	4	0.006		0.02		1	1	1	0	0
LSM3	Lsm3 protein	nucleus	2	0.202		#N/A	0.0309443		#N/A		#N/A		#N/A		#N/A		0	0	0	0	0
LYAR	hypothetical protein FLJ20425	nucleus,nucleolus	2	0.45	1	0.15	0.0797506		#N/A		0.183	4	0.017		0.01		1	1	1	0	0
MAP2K2	mitogen-activated protein kinase kinase 2	cytoplasm	1	0.1		0.12	0.0782872		#N/A		0.073		0.029		0.012		0	0	0	0	1
MAPK1	mitogen-activated protein kinase 1	cytoplasm,nucleus	9	0.0625		#N/A	0.0463477		#N/A		#N/A		#N/A		#N/A		0	0	0	1	1
MAPKAP1	mitogen-activated protein kinase associated	plasma membrane	7	0.062		0.3	0.0139197		0.297		0.107		0.017		0.011		0	0	0	0	1
MBNL2	muscleblind-like 2 isoform 1	cytoplasm,nucleus	9	0.185		#N/A	0.0597315		#N/A		#N/A		#N/A		#N/A		0	0	0	0	0
MCEE	methylmalonyl-CoA epimerase	intracellular,cytoplasm	6	0.049		0.15	0.092889	2	#N/A		0.102		0.017		0.004		1	0	1	0	0
MDH1	cytosolic malate dehydrogenase	cytoplasm	1	0.157		0.09	0.0311639		0.341		0.047		0.006		0.011		0	0	0	0	1
METAP2	methionyl aminopeptidase 2	cytoplasm	1	0.0773		0.14	0.05847		0.325		0.101		0.0105		0.0095		0	0	0	0	0
MGC11257	hypothetical protein LOC84310	nucleus,nucleolus	2	0.203		#N/A	0.0353871		#N/A		#N/A		#N/A		#N/A		0	0	0	0	0
mimitin	Homo sapiens mimitin mRNA for Myc-induced mitochondria protein, complete cds.	mitochondrion	5	0.102		0.063	0.0719114		0.113		0.081		0.018		0.01		0	0	0	0	0
MKI67IP	MKI67 (FHA domain) interacting nucleolar	nucleus,nucleolus	2	0.232		0.107	0.0552064		0.425	3	#N/A		#N/A		#N/A		1	1	1	0	0
MLLT4	myeloid/lymphoid or mixed-lineage leukemia	cytoplasm	1	0.228		0.135	0.058576		0.253		0.0755		0.016		0.009		0	0	0	0	0
MRPL37	mitochondrial ribosomal protein L37	cytoplasm,mitochondrion	5	0.389	1	#N/A	0.0395191		#N/A		#N/A		#N/A		#N/A		1	0	0	0	0
MRPS18B	mitochondrial ribosomal protein S18B	cytoplasm	1	0.156		#N/A	0.0632037		#N/A		#N/A		#N/A		#N/A		0	0	0	0	0
MRTO4	ribosomal protein P0-like protein	nucleus,nucleolus	2	0.127		0.3	0.069428		0.264		0.06		#N/A		0.012		0	0	0	0	0
MSRA	methionine sulfoxide reductase A	intracellular,plasma membrane	6	0.149		0.407	0.0886604	2	#N/A		0.154	4	0.008		0.019		1	1	1	0	0
MTPN	myotrophin	intracellular	6	0.118		#N/A	0.0636288		#N/A		0.038		0.024		0.007		0	0	0	0	0
MYH9	myosin, heavy polypeptide 9, non-muscle	cytoplasm,plasma membrane	9	0.145		0.119	#N/A		0.127		0.075		0.042		0.007		0	0	0	1	1
NACA	nascent-polypeptide-associated complex alpha	cytoplasm	1	0.075		#N/A	0.0318617		0.169		0.069		0.014		0.012		0	0	0	0	0
NASP	nuclear autoantigenic sperm protein isoform 1	nucleus	2	0.2677		0.125	0.0652282		0.154		0.1225		0.008		0.012		0	0	0	1	1
NCBP2	nuclear cap binding protein subunit 2, 20kDa	nucleus	2	0.06		#N/A	0.0506876		#N/A		#N/A		#N/A		#N/A		0	0	0	0	0
NCL	nucleolin	nucleus,nucleolus	2	0.1695		0.12	0.0216789		0.563	3	0.1616	4	0.0292		0.0182		1	1	1	0	1
NDUFAF2	NADH dehydrogenase (ubiquinone) 1 alpha	mitochondrion	5	0.2017		0.069	#N/A		0.2377		0.068		0.0093		0.0093		0	0	0	0	0
NDUFB11	NADH dehydrogenase (ubiquinone) 1 beta	mitochondrion	5	0.1937		0.148	#N/A		0.274		0.137		0.0113		0.0153		0	0	0	0	0
NDUFB8	NADH dehydrogenase (ubiquinone) 1 beta	mitochondrion	5	0.2713		0.045	0.0355988		0.249		0.1735	4	0.0125		0.015		1	1	1	0	0
NEXN	Nexilin.	cytoplasm,plasma membrane	9	0.102		0.057	0.0336269		0.171		0.086		0.006		0.009		0	0	0	0	0
NGRN	mesenchymal stem cell protein DSC92 isoform 2	nucleus	2	0.168		0.16	0.0506861		0.259		0.124		0.003		0.012		0	0	0	0	0
NHP2L1	NHP2 non-histone chromosome protein 2-like 1	nucleus,nucleolus	2	0.1287		0.22	0.0524332		0.45	3	0.171	4	0.007		0.017		1	1	1	0	0
NME2	nucleoside diphosphate kinase B	intracellular	6	0.11		0.1	0.0400172		#N/A		0.135		0.007		0.009		0	0	0	0	0
NME4	nucleoside-diphosphate kinase 4	intracellular	6	0.079		0.16	0.0451003		0.364		0.062		0.017		0.005		0	0	0	0	0
NMT1	N-myristoyltransferase 1	cytoplasm	1	0.052		0.16	0.0952984	2	0.248		0.082		0.004		0.005		1	0	1	0	1
NOL7	nucleolar protein 7, 27kDa	unknown	9	0.241		0.307	0.0163373		#N/A		0.121		0.299	5	0.02		1	1	1	0	0
NPEPPS	aminopeptidase puromycin sensitive	cytoplasm	1	0.168		#N/A	0.0585021		#N/A		0.051		0.019		0.005		0	0	0	0	0
NPM1	nucleophosmin 1 isoform 1	nucleus,nucleolus	2	0.159		0.264	0.0167806		0.4176	3	0.1132		0.012		0.0131		1	1	1	1	1
NSMCE4A	non-SMC element 4 homolog A	cytoplasm	1	0.036		#N/A	0.04274		#N/A		0.046		0.021		0.005		0	0	0	0	0
NTAN1	N-terminal Asn amidase	cytoplasm	1	0.15		0.137	0.0830466	2	0.36		0.108		0.01		0.007		1	0	1	0	0
NUCKS1	nuclear ubiquitous casein kinase and	nucleus	2	0.1225		0.14	0.0373535		0.185		0.0415		0.009		0.005		0	0	0	0	0
NUDCD2	NudC domain containing 2	intracellular	6	0.128		0.09	0.0677221		#N/A		0.11		0.014		0.012		0	0	0	0	0
NUDT3	nudix-type motif 3	intracellular	6	0.133		0.14	0.0806163	2	#N/A		0.085		0.043		0.011		1	0	1	0	0
PABPN1	poly(A) binding protein, nuclear 1	cytoplasm,nucleus	9	0.179		0.294	0.0827871	2	#N/A		0.107		0.008		0.016		1	0	1	0	1
PAGE1	P antigen family, member 1	intracellular	6	0.182		0.07	0.070908		0.363		0.151	4	0.014		0.012		1	1	1	0	0
PAK2	p21-activated kinase 2	cytoplasm	1	0.326	1	#N/A	0.0940822	2	#N/A		#N/A		#N/A		#N/A		1	0	1	0	0
PCBD1	pterin-4 alpha-carbinolamine dehydratase	cytoplasm,nucleus	9	0.262		0.09	0.0577348		#N/A		0.133		0.009		0.014		0	0	0	0	1
PCMTD2	protein-L-isoaspartate (D-aspartate)	cytoplasm	1	0.088		0.43	0.047847		#N/A		0.038		0.018		0.004		0	0	0	0	0
PDCD5	programmed cell death 5	intracellular	6	0.161		0.12	0.0540878		#N/A		0.08		0.009		0.0105		0	0	0	0	0
PDIA5	protein disulfide isomerase-associated 5	endoplasmic reticulum	3	0.104		0.287	0.0812792	2	0.419	3	0.032		0.006		0.005		1	1	1	0	0
PFDN5	prefoldin subunit 5 isoform alpha	cytoplasm,nucleus	9	0.1808		0.169	0.0504018		0.385		0.1558	4	0.0107		0.0158		1	1	1	0	0
PFN1	profilin 1	cytoplasm	1	0.186		0.077	0.0410167		0.153		0.041		0.008		0.006		0	0	0	0	0
PGK1	phosphoglycerate kinase 1	cytoplasm	1	0.06		#N/A	0.0712184		#N/A		0.089		0.008		0.011		0	0	0	0	0
PHPT1	phosphohistidine phosphatase 1	intracellular	6	0.188		#N/A	0.052856		0.441	3	0.06		0.016		0.007		1	1	1	0	0
PLEC1	plectin 1 isoform 6	cytoplasm	1	0.134		0.182	0.0914149	2	0.277		0.061		0.019		0.0117		1	0	1	0	0
PLS3	plastin 3	cytoplasm	1	0.107		0.297	0.0816396	2	#N/A		0.133		0.013		0.013		1	0	1	0	0
POLR1D	polymerase (RNA) I polypeptide D isoform 1	nucleolus	2	0.147		0.122	0.0813029	2	0.1775		0.07		0.015		0.0125		1	0	1	0	0
POLR2F	DNA directed RNA polymerase II polypeptide F	nucleus,nucleolus	2	0.222		0.085	#N/A		0.229		0.1495		0.0185		0.0145		0	0	0	0	1
POLR2G	DNA directed RNA polymerase II polypeptide G	intracellular	6	0.1597		0.15	0.0586396		#N/A		0.0937		0.018		0.0067		0	0	0	0	1
POLR2L	DNA directed RNA polymerase II polypeptide L	nucleus	2	0.152		0.13	#N/A		0.203		0.088		0.01		0.007		0	0	0	0	1
POLR3GL	polymerase (RNA) III (DNA directed) polypeptide	nucleus	2	0.047		0.27	0.0336927		0.276		0.066		0.0095		0.007		0	0	0	0	0
POMP	proteasome maturation protein	cytoplasm,nucleus	9	0.3215	1	0.159	#N/A		0.327		0.1295		0.012		0.0075		1	0	0	0	0
PPFIBP1	PTPRF interacting protein binding protein 1	cytoplasm	1	0.357	1	#N/A	0.0708076		#N/A		#N/A		#N/A		#N/A		1	0	0	0	0
PPIA	peptidylprolyl isomerase A	intracellular	6	0.1426		0.14	0.0374606		0.2405		0.0885		0.0155		0.0098		0	0	0	0	1
PPP1R14B	protein phosphatase 1 regulatory subunit 14B	cytoplasm	1	0.275		0.107	0.0536863		0.303		0.088		0.024		0.018		0	0	0	0	0
PRC1	protein regulator of cytokinesis 1 isoform 1	nucleus	2	0.4448	1	0.188	0.170504	2	#N/A		0.1356		0.1318	5	0.0228	6	1	1	1	1	1
PRDX5	peroxiredoxin 5 precursor, isoform a	mitochondrion	5	0.264		0.073	#N/A		0.346		0.0985		0.0125		0.007		0	0	0	0	0
PREPL	prolyl endopeptidase-like isoform C	cytoplasm	1	0.091		0.234	0.0988343	2	#N/A		0.039		0.015		0.003		1	0	1	0	0
PRKAR2A	cAMP-dependent protein kinase, regulatory	cytoplasm	1	0.38	1	#N/A	0.0720159		#N/A		0.167	4	0.058	5	0.027	6	1	1	1	0	1
PROCR	Homo sapiens protein C receptor, endothelial (EPCR), mRNA (cDNA clone MGC:23024 IMAGE:4907433), complete cds.	cytoplasm,plasma membrane	9	0.302	1	#N/A	0.0727492		#N/A		#N/A		#N/A		#N/A		1	0	0	0	1
PRR13	proline rich 13 isoform 2	nucleus	2	0.128		#N/A	#N/A		#N/A		#N/A		#N/A		#N/A		0	0	0	0	0
PSIP1	PC4 and SFRS1 interacting protein 1 isoform 2	nucleus	2	0.605	1	#N/A	0.0850211	2	#N/A		#N/A		#N/A		#N/A		1	0	1	0	1
PSMA1	proteasome alpha 1 subunit isoform 2	cytoplasm,nucleus	9	0.1133		0.28	0.0713543		0.446	3	0.0523		0.0197		0.0057		1	1	1	1	1
PSMA3	proteasome alpha 3 subunit isoform 1	cytoplasm,nucleus	9	0.114		0.21	#N/A		#N/A		0.039		0.008		0.007		0	0	0	1	1
PSMA7	proteasome alpha 7 subunit	intracellular	6	0.202		0.205	#N/A		0.305		0.0975		0.0055		0.008		0	0	0	1	1
PSMB1	proteasome beta 1 subunit	cytoplasm,nucleus	9	0.1305		0.204	#N/A		#N/A		0.0555		0.0185		0.005		0	0	0	1	1
PSMB4	proteasome beta 4 subunit	cytoplasm	1	0.2773		0.142	#N/A		#N/A		0.0415		0.012		0.004		0	0	0	1	1
PSMB6	proteasome beta 6 subunit	cytoplasm,nucleus	9	0.137		0.264	0.028907		0.2637		0.0515		0.018		0.007		0	0	0	1	1
PSMB7	proteasome beta 7 subunit proprotein	cytoplasm	1	0.425	1	0.12	#N/A		#N/A		0.195	4	0.01		0.012		1	1	1	1	1
PSMC1	proteasome 26S ATPase subunit 1	cytoplasm,nucleus	9	0.257		0.104	0.0643388		0.413	3	0.068		0.018		0.0085		1	1	1	1	1
PSMC4	proteasome 26S ATPase subunit 4 isoform 1	cytoplasm,nucleus	9	0.343	1	0.155	#N/A		0.277		0.2865	4	0.009		0.014		1	1	1	1	1
PSMD1	proteasome 26S non-ATPase subunit 1	intracellular	6	0.164		#N/A	0.0366355		#N/A		#N/A		#N/A		#N/A		0	0	0	1	1
PSMD12	proteasome 26S non-ATPase subunit 12 isoform 1	cytoplasm,nucleus	9	0.28		0.178	#N/A		#N/A		0.044		0.036		0.017		0	0	0	1	1
PSMD8	proteasome 26S non-ATPase subunit 8	cytoplasm,Golgi	4	0.273		#N/A	0.0990331	2	#N/A		#N/A		#N/A		#N/A		1	0	1	1	1
PSMF1	proteasome inhibitor subunit 1 isoform 1	cytoplasm	1	0.089		0.124	0.0603124		0.287		0.103		0.008		0.012		0	0	0	1	1
PSPC1	paraspeckle protein 1	nucleus	2	0.124		0.32	0.0297827		0.287		0.104		0.018		0.011		0	0	0	0	0
PTPN1	protein tyrosine phosphatase, non-receptor type	endoplasmic reticulum	3	0.114		0.115	0.0341175		0.4335	3	0.066		0.0195		0.007		1	1	1	0	1
PTPN11	protein tyrosine phosphatase, non-receptor type	cytoplasm,nucleus	9	0.125		#N/A	0.0449294		#N/A		#N/A		#N/A		#N/A		0	0	0	0	1
PTTG1IP	pituitary tumor-transforming gene 1	cytoplasm,Golgi,plasma membrane,nucleus,nuclear membrane	4	0.065		0.25	0.0256625		0.142		0.092		0.021		0.01		0	0	0	0	0
PXK	PX domain containing serine/threonine kinase	intracellular	6	0.131		0.3	0.0370345		0.407	3	0.062		0.019		0.005		1	1	1	0	0
RAB11A	Ras-related protein Rab-11A	Golgi	4	0.1955		0.24	0.0956602	2	0.194		0.088		0.013		0.01		1	0	1	1	1
RAB1A	RAB1A, member RAS oncogene family	cytoplasm,endoplasmic reticulum	3	0.063		0.13	0.0972932	2	0.261		0.067		0.008		0.008		1	0	1	0	0
RAB33A	Ras-related protein Rab-33A	cytoplasm,plasma membrane	9	0.305	1	0.44	0.0889387	2	#N/A		0.163	4	0.015		0.013		1	1	1	0	0
RAC1	ras-related C3 botulinum toxin substrate 1	cytoplasm,plasma membrane	9	0.215		0.22	0.0509907		0.294		0.077		0.0155		0.0065		0	0	0	0	1
RANBP1	RAN binding protein 1	cytoplasm	1	0.136		0.14	0.0775678		#N/A		0.125		0.019		0.007		0	0	0	1	1
RAVER1	RAVER1	nucleus,nuclear bodies	2	0.282		0.19	0.0284582		0.2		0.127		0.019		0.012		0	0	0	0	1
RBM27	RNA-binding protein 27 (RNA-binding motif protein 27).	cytoplasm	1	0.126		0.357	0.0317133		0.218		0.037		0.017		0.008		0	0	0	0	0
RBM41	RNA binding motif protein 41	cytoplasm	1	0.06		#N/A	0.0898608	2	#N/A		0.126		0.016		0.005		1	0	1	0	0
RBM8A	RNA binding motif protein 8A	cytoplasm,nucleus	9	0.047		0.227	0.0701362		#N/A		0.037		0.014		0.005		0	0	0	0	0
RBX1	ring-box 1	intracellular	6	0.078		0.11	0.0486785		#N/A		0.067		0.01		0.026	6	1	1	1	0	1
RFC1	replication factor C large subunit	nucleus,nucleolus	2	0.142		0.07	0.0408518		0.088		0.0505		0.008		0.008		0	0	0	1	1
RGS10	regulator of G-protein signaling 10 isoform b	cytoplasm,nucleus	9	0.0965		0.25	0.0286045		0.293		0.095		0.019		0.01		0	0	0	0	0
RHD	Rh blood group D antigen	cytoplasm,plasma membrane	9	0.163		#N/A	0.0596129		#N/A		0.082		0.007		0.012		0	0	0	0	0
RPA2	replication protein A2, 32kDa	nucleus	2	0.226		0.316	#N/A		0.386		0.0535		0.0155		0.0085		0	0	0	1	1
RPL11	ribosomal protein L11	cytoplasm,ribosome,nucleolus	9	0.197		0.247	#N/A		0.4015	3	0.052		0.008		0.0095		1	1	1	0	1
RPL13A	ribosomal protein L13a	cytoplasm,nucleolus	9	0.124		0.05	0.0339811		0.257		0.083		0.05		0.011		0	0	0	0	1
RPL18	ribosomal protein L18	nucleus,nucleolus	2	0.1872		0.17	0.0310852		0.3102		0.1332		0.0208		0.0152		0	0	0	0	1
RPL23a	ribosomal protein L23a	nucleus,nucleolus	2	0.194		0.097	0.0613746		0.237		0.179	4	0.127	5	0.012		1	1	1	0	1
RPL24	ribosomal protein L24	cytoplasm	1	0.513	1	#N/A	0.0765066		#N/A		#N/A		#N/A		#N/A		1	0	0	0	1
RPL27	ribosomal protein L27	cytoplasm,nucleolus	9	0.546	1	0.22	#N/A		#N/A		0.311	4	0.054	5	0.014		1	1	1	0	1
RPL27A	ribosomal protein L27a	nucleus,nucleolus	2	0.21		0.087	#N/A		0.297		0.109		0.027		0.014		0	0	0	0	1
RPL29	ribosomal protein L29	intracellular,cytoplasm,nucleus	6	0.2213		0.1	#N/A		0.206		0.0577		0.0093		0.0063		0	0	0	0	1
RPL30	ribosomal protein L30	cytoplasm,nucleolus	9	0.253		0.122	#N/A		0.358		0.0665		0.0125		0.01		0	0	0	0	1
RPL36	ribosomal protein L36	cytoplasm,nucleolus	9	0.1		0.14	0.0904051	2	#N/A		0.068		0.025		0.009		1	0	1	0	1
RPL37	ribosomal protein L37	nucleus,nucleolus	2	0.117		0.11	0.0456131		0.146		0.121		0.029		0.009		0	0	0	0	1
RPL39	ribosomal protein L39	ribosome,nucleolus	2	0.2563		0.234	#N/A		0.41	3	0.214	4	0.014		0.019		1	1	1	0	0
RPL41	ribosomal protein L41	cytoplasm,nucleolus	9	0.2135		0.093	0.04999		0.158		0.1285		0.0105		0.014		0	0	0	0	1
RPL6	ribosomal protein L6	cytoplasm,nucleolus	9	0.2223		0.063	0.0529781		0.3162		0.122		0.0203		0.0155		0	0	0	0	1
RPL7A	ribosomal protein L7a	cytoplasm,nucleolus	9	0.093		0.23	0.043881		0.226		0.065		0.01		0.014		0	0	0	0	1
RPLP0	ribosomal protein P0	cytoplasm	1	0.17		0.097	0.11446	2	#N/A		0.069		0.007		0.009		1	0	1	0	1
RPLP2	ribosomal protein P2	cytoplasm	1	0.073		#N/A	0.072818		#N/A		#N/A		#N/A		#N/A		0	0	0	0	1
RPS12	ribosomal protein S12	cytoplasm,nucleolus	9	0.155		0.3	0.0720867		0.2305		0.0335		0.017		0.0065		0	0	0	0	1
RPS13	ribosomal protein S13	nucleolus	2	0.28		0.237	0.0406657		#N/A		0.114		0.023		0.012		0	0	0	0	1
RPS15	ribosomal protein S15	nucleus,nucleolus	2	0.08		#N/A	#N/A		#N/A		#N/A		#N/A		#N/A		0	0	0	0	1
RPS16	ribosomal protein S16	cytoplasm	1	0.127		0.257	0.0450189		#N/A		0.127		0.019		0.008		0	0	0	0	1
RPS18	ribosomal protein S18	cytoplasm	1	0.308	1	0.147	0.0878625	2	#N/A		0.112		0.025		0.024	6	1	1	1	0	1
RPS19BP1	S19 binding protein	nucleus,nucleolus	2	0.1497		0.118	0.0467849		0.3437		0.1687	4	0.021		0.0183		1	1	1	0	0
RPS2	ribosomal protein S2	cytoplasm	1	0.3817	1	0.161	#N/A		0.2033		0.1628	4	0.0125		0.011		1	1	1	0	1
RPS20	Homo sapiens clone FLB0708 mRNA sequence.	cytoplasm	1	0.177		0.18	0.0478932		#N/A		0.092		0.009		0.019		0	0	0	0	1
RPS23	ribosomal protein S23	nucleus	2	0.178		#N/A	0.0203079		#N/A		#N/A		#N/A		#N/A		0	0	0	0	1
RPS24	ribosomal protein S24 isoform c	ribosome,nucleolus	2	0.0965		0.168	0.0609148		0.171		0.0625		0.011		0.0105		0	0	0	0	1
RPS25	ribosomal protein S25	cytoplasm	1	0.137		0.087	0.0552944		0.277		0.046		0.011		0.006		0	0	0	0	1
RPS28	ribosomal protein S28	cytoplasm	1	0.078		0.26	0.0620174		0.35		0.113		0.018		0.009		0	0	0	0	0
RPS3	ribosomal protein S3	cytoplasm,nucleus	9	0.308	1	#N/A	#N/A		#N/A		#N/A		#N/A		#N/A		1	0	0	0	1
RPS3A	ribosomal protein S3a	cytoplasm,nucleus,nucleolus	9	0.2067		0.198	0.027993		0.2525		0.0714		0.0098		0.0118		0	0	0	0	1
RPS6	ribosomal protein S6	nucleus,nucleolus	2	0.2042		0.146	#N/A		0.3463		0.1677	4	0.0327		0.0217	6	1	1	1	0	1
RPS7	ribosomal protein S7	nucleus,nucleolus	2	0.1303		0.184	0.0426773		0.32		0.0897		0.0133		0.0113		0	0	0	0	1
RPS8	ribosomal protein S8	nucleus,nucleolus	2	0.218		0.22	#N/A		0.554	3	0.117		0.085	5	0.013		1	1	1	0	1
RRAS	related RAS viral (r-ras) oncogene homolog	intracellular	6	0.084		0.15	0.0291585		0.287		0.064		0.017		0.008		0	0	0	0	0
RSL1D1	ribosomal L1 domain containing 1	nucleus,nucleolus	2	0.089		0.09	0.0204397		0.302		0.111		0.015		0.013		0	0	0	0	0
S100A10	S100 calcium binding protein A10	cytoplasm	1	0.243		0.44	0.10166	2	#N/A		0.142		0.01		0.014		1	0	1	0	0
SAFB2	scaffold attachment factor B2	nucleus	2	0.045		0.23	0.0170524		#N/A		0.061		0.009		0.006		0	0	0	0	0
SAP30BP	transcriptional regulator protein	intracellular,cytoplasm,nucleus	6	0.2235		0.08	0.0562659		0.254		0.056		0.01		0.01		0	0	0	0	0
SCAMP2	secretory carrier membrane protein 2	plasma membrane	7	0.214		#N/A	0.0655423		#N/A		#N/A		#N/A		#N/A		0	0	0	0	0
SEC14L1	SEC14 (S. cerevisiae)-like 1 isoform a	cytoplasm	1	0.213		#N/A	0.0537626		#N/A		#N/A		#N/A		#N/A		0	0	0	0	0
SELM	selenoprotein M precursor	cytoplasm,nucleus	9	0.329	1	#N/A	0.0630044		#N/A		#N/A		#N/A		#N/A		1	0	0	0	0
SERF2	small EDRK-rich factor 2	cytoplasm	1	0.052		0.2	0.0259801		0.212		0.059		0.008		0.008		0	0	0	0	0
SERPINB6	MSTP057.	cytoplasm	1	0.135		#N/A	0.104548	2	#N/A		#N/A		#N/A		#N/A		1	0	1	0	0
SF3B1	splicing factor 3b, subunit 1 isoform 1	nucleus	2	0.212		#N/A	0.0826581	2	#N/A		#N/A		#N/A		#N/A		1	0	1	0	1
SF3B14	splicing factor 3B, 14 kDa subunit	nucleus	2	0.1845		#N/A	0.0471941		#N/A		#N/A		#N/A		#N/A		0	0	0	0	0
SFRS10	Homo sapiens mRNA for splicing factor, arginine/serine-rich 10 (transformer 2 homolog, Drosophila) variant protein.	nucleus	2	0.129		#N/A	0.0262855		#N/A		#N/A		#N/A		#N/A		0	0	0	0	0
SFRS7	splicing factor, arginine/serine-rich 7	nucleus	2	0.18		#N/A	0.0192418		#N/A		#N/A		#N/A		#N/A		0	0	0	0	0
SH3GLB1	SH3-containing protein SH3GLB1	cytoplasm	1	0.183		0.317	0.112021	2	0.211		0.072		0.022		0.01		1	0	1	0	1
SLBP	histone stem-loop binding protein	cytoplasm,nucleus,nucleolus	9	0.11		0.127	0.0387123		0.3133		0.115		0.013		0.0143		0	0	0	1	1
SLC22A18AS	solute carrier family 22 (organic cation	intracellular,nucleus	6	0.166		#N/A	0.0295258		#N/A		#N/A		#N/A		#N/A		0	0	0	0	0
SLC25A37	mitochondrial solute carrier protein	cytoplasm,plasma membrane	9	0.2055		0.197	0.0635733		#N/A		0.219	4	0.017		0.021	6	1	1	1	0	0
SLC6A7	solute carrier family 6, member 7	cytoplasm,plasma membrane	9	0.212		0.07	0.0705612		#N/A		0.105		0.048		0.019		0	0	0	0	0
SLC9A3R1	solute carrier family 9 (sodium/hydrogen	cytoplasm,plasma membrane	9	0.214		#N/A	0.106261	2	#N/A		#N/A		#N/A		#N/A		1	0	1	0	1
SLTM	modulator of estrogen induced transcription	nucleus	2	0.114		0.069	0.0339405		0.1715		0.0725		0.0195		0.0085		0	0	0	0	1
SMS	spermine synthase	intracellular	6	0.2115		0.302	0.0564015		#N/A		0.1475		0.014		0.014		0	0	0	0	0
SNRPD1	small nuclear ribonucleoprotein D1 polypeptide	nucleus	2	0.054		#N/A	0.0411138		0.09		0.083		0.021		0.009		0	0	0	0	0
SNX3	sorting nexin 3	cytoplasm	1	0.176		#N/A	0.0706306		#N/A		#N/A		#N/A		#N/A		0	0	0	0	0
SPATA12	spermatogenesis associated 12	mitochondrion	5	0.098		0.04	0.0650042		0.25		0.094		0.006		0.015		0	0	0	0	0
SPATS2	spermatogenesis associated, serine-rich 2	cytoplasm	1	0.224		#N/A	0.0849015	2	#N/A		#N/A		#N/A		#N/A		1	0	1	0	0
SPCS1	signal peptidase complex subunit 1 homolog	endoplasmic reticulum,plasma membrane	3	0.1087		0.327	0.0522185		#N/A		0.1157		0.0087		0.0097		0	0	0	0	0
SPG20	spartin	cytoplasm	1	0.11		#N/A	0.0897937	2	#N/A		#N/A		#N/A		#N/A		1	0	1	0	0
SR140	U2-associated SR140 protein	nucleus	2	0.072		0.11	0.0295442		0.336		0.14		0.02		0.023	6	1	1	1	0	0
SRM	spermidine synthase	intracellular	6	0.205		0.12	0.057765		#N/A		0.219	4	0.031		0.037	6	1	1	1	0	0
SRRM1	serine/arginine repetitive matrix 1	nucleus	2	0.1185		0.23	0.0210216		0.365		0.121		0.01		0.014		0	0	0	0	0
SSBP1	single-stranded DNA binding protein 1	mitochondrion,Golgi	5	0.237		0.087	0.0878422	2	0.287		0.063		0.022		0.011		1	0	1	0	0
STAU1	staufen isoform a	cytoplasm	1	0.131		#N/A	0.105777	2	#N/A		#N/A		#N/A		#N/A		1	0	1	0	0
STMN1	stathmin 1	cytoplasm	1	0.3195	1	#N/A	#N/A		#N/A		#N/A		#N/A		#N/A		1	0	0	1	1
SUMO2	SMT3 suppressor of mif two 3 homolog 2 isoform a	nucleus	2	0.105		#N/A	0.0282599		#N/A		#N/A		#N/A		#N/A		0	0	0	0	1
T85821	yd57b09.r1 Soares fetal liver spleen 1NFLS Homo sapiens cDNA clone IMAGE:112313 5' similar to contains MER25 repetitive element ;, mRNA sequence.	cytoplasm	1	0.127		0.247	0.0491429		0.286		0.106		0.011		0.009		0	0	0	0	0
TARS	threonyl-tRNA synthetase	cytoplasm	1	0.052		0.117	0.0601528		0.262		0.043		0.016		0.003		0	0	0	0	0
TBCA	tubulin-specific chaperone a	cytoplasm	1	0.426	1	0.133	#N/A		0.222		0.2195	4	0.022		0.0185		1	1	1	0	1
TBCB	cytoskeleton associated protein 1	cytoplasm,plasma membrane	9	0.114		0.177	0.0769342		0.164		0.094		0.029		0.0165		0	0	0	0	0
TES	testin isoform 1	intracellular	6	0.073		0.4	0.0702396		0.362		0.036		0.017		0.005		0	0	0	0	0
TFAM	transcription factor A, mitochondrial	mitochondrion	5	0.1217		0.145	0.0701993		0.2235		0.11		0.007		0.012		0	0	0	0	0
TIMM23	translocase of inner mitochondrial membrane 23	mitochondrion	5	0.1763		0.09	#N/A		0.145		0.102		0.0105		0.012		0	0	0	0	0
TJP1	tight junction protein 1 isoform b	Golgi,plasma membrane	4	0.125		0.19	0.0474989		0.228		0.143		0.02		0.0175		0	0	0	0	0
TLCD1	TLC domain containing 1	cytoplasm,plasma membrane	9	0.079		0.147	0.0881556	2	0.329		0.07		0.027		0.012		1	0	1	0	0
TLN2	talin 2	cytoplasm	1	0.064		0.12	0.063003		0.256		0.124		0.011		0.012		0	0	0	0	0
TLOC1	translocation protein 1	endoplasmic reticulum	3	0.24		#N/A	0.099801	2	#N/A		#N/A		#N/A		#N/A		1	0	1	0	0
TMEM123	pro-oncosis receptor inducing membrane injury	intracellular	6	0.079		0.117	0.0788961		0.352		0.046		0.037		0.016		0	0	0	0	0
TMEM132D	hypothetical protein LOC121256	cytoplasm,plasma membrane	9	0.113		0.224	0.0510179		0.307		0.046		0.02		0.007		0	0	0	0	0
TMEM49	transmembrane protein 49	cytoplasm	1	0.187		#N/A	0.12642	2	#N/A		#N/A		#N/A		#N/A		1	0	1	0	0
TMPO	thymopoietin isoform alpha	nucleus	2	0.144		0.16	0.0254752		0.272		0.112		0.007		0.012		0	0	0	0	1
TOMM70A	translocase of outer mitochondrial membrane 70	mitochondrion,plasma membrane	5	0.1185		0.05	#N/A		0.196		0.1005		0.012		0.012		0	0	0	0	1
TOP1	DNA topoisomerase I	nucleus,nucleolus	2	0.113		0.15	0.0208452		0.141		0.0965		0.0157		0.0117		0	0	0	0	1
TPM1	tropomyosin 1 alpha chain isoform 1	cytoplasm	1	0.097		0.14	0.051835		0.209		0.137		0.009		0.008		0	0	0	0	1
TPM3	Tropomyosin 3.	cytoplasm	1	0.203		#N/A	0.105511	2	#N/A		#N/A		#N/A		#N/A		1	0	1	0	0
TRAPPC6A	trafficking protein particle complex 6A	Golgi	4	0.18		0.177	0.0295847		#N/A		0.066		0.005		0.006		0	0	0	0	0
TRIM25	tripartite motif-containing 25	cytoplasm	1	0.093		0.1	0.0450149		0.221		0.107		0.011		0.007		0	0	0	0	0
TUBA1B	tubulin, alpha, ubiquitous	cytoplasm	1	0.1977		0.19	0.0691977		0.311		0.091		0.017		0.007		0	0	0	0	1
TUBA1C	tubulin alpha 6	cytoplasm	1	0.1867		0.134	0.102086	2	0.219		0.15		0.023		0.013		1	0	1	0	1
TUBB2C	tubulin, beta, 2	cytoplasm	1	0.2487		0.098	0.0961848	2	0.322		0.0843		0.0147		0.009		1	0	1	1	0
TWF1	twinfilin 1	cytoplasm	1	0.04		0.15	0.045171		0.328		0.071		0.02		0.004		0	0	0	0	0
TXN	thioredoxin	intracellular	6	0.362	1	0.118	#N/A		0.397		0.1725	4	0.0158		0.0113		1	1	1	0	1
TXNL1	thioredoxin-like 1	cytoplasm,nucleus	9	0.1615		0.369	0.101216	2	0.251		0.095		0.0153		0.0103		1	0	1	0	0
TXNRD1	thioredoxin reductase 1	intracellular,cytoplasm,nucleus	6	0.2656		0.075	0.0478236		0.359		0.1043		0.014		0.0062		0	0	0	0	1
U2AF1	U2 small nuclear RNA auxillary factor 1 isoform	nucleus	2	0.1575		0.256	0.036419		0.2035		0.127		0.0245		0.014		0	0	0	0	1
UAP1	UDP-N-acteylglucosamine pyrophosphorylase 1	cytoplasm	1	0.109		0.307	0.106921	2	#N/A		0.041		0.014		0.007		1	0	1	0	0
UBE2K	ubiquitin-conjugating enzyme E2-25K isoform 1	intracellular	6	0.3375	1	0.17	#N/A		#N/A		0.17	4	0.015		0.006		1	1	1	0	0
UBE2L3	ubiquitin-conjugating enzyme E2L 3 isoform 2	cytoplasm,nucleus	9	0.053		0.33	0.0438773		0.255		0.1595	4	0.015		0.015		1	1	1	0	1
UBE2N	ubiquitin-conjugating enzyme E2N	nucleus	2	0.2005		0.26	#N/A		0.115		0.0935		0.0185		0.0095		0	0	0	0	1
UBE2Q2	ubiquitin-conjugating enzyme E2Q (putative) 2	cytoplasm	1	0.17		0.09	0.0820085	2	#N/A		0.053		0.04		0.012		1	0	1	0	0
UBE2V1	ubiquitin-conjugating enzyme E2 variant 1	intracellular	6	0.152		0.22	0.050958		#N/A		0.114		0.023		0.0165		0	0	0	0	1
UBE2V2	ubiquitin-conjugating enzyme E2 variant 2	cytoplasm,nucleus	9	0.4035	1	0.138	#N/A		#N/A		0.1195		0.0165		0.0105		1	0	0	0	1
UGP2	UDP-glucose pyrophosphorylase 2 isoform b	cytoplasm	1	0.17		#N/A	#N/A		#N/A		#N/A		#N/A		#N/A		0	0	0	0	0
UPF2	UPF2 regulator of nonsense transcripts homolog	cytoplasm	1	0.187		0.06	0.0569156		0.257		0.082		0.009		0.005		0	0	0	0	0
UQCRB	ubiquinol-cytochrome c reductase binding	cytoplasm,mitochondrion	5	0.1345		0.148	0.0997586	2	#N/A		0.122		0.026		0.0185		1	0	1	0	0
UQCRFS1	ubiquinol-cytochrome c reductase, Rieske	cytoplasm	1	0.119		0.23	0.0771678		0.269		0.098		0.009		0.007		0	0	0	0	0
USP14	ubiquitin specific protease 14 isoform a	intracellular	6	0.111		0.147	0.0466023		#N/A		0.091		0.007		0.007		0	0	0	0	0
VASP	vasodilator-stimulated phosphoprotein isoform 1	cytoplasm	1	0.347	1	0.374	#N/A		0.251		0.153	4	#N/A		#N/A		1	1	1	0	0
VBP1	von Hippel-Lindau binding protein 1	cytoplasm,nucleus	9	0.151		0.33	0.162141	2	#N/A		0.192	4	0.014		0.022	6	1	1	1	0	0
VCL	vinculin isoform meta-VCL	cytoplasm	1	0.2		0.128	0.0885736	2	0.233		0.12		0.013		0.005		1	0	1	0	1
VIL2	villin 2	plasma membrane,cytoskeleton	7	0.2253		0.177	0.0616565		#N/A		0.073		0.013		0.004		0	0	0	0	0
VPS26A	vacuolar protein sorting 26 A isoform 1	cytoplasm,plasma membrane	9	0.1111		0.161	0.0420504		0.2357		0.0687		0.0077		0.0083		0	0	0	0	0
vPS26A	vacuolar protein sorting 26 A isoform 1	cytoplasm,plasma membrane	9	0.096		0.161	0.0420504		0.2357		0.0687		0.0077		0.0083		0	0	0	0	0
VPS4B	vacuolar protein sorting factor 4B	intracellular	6	0.172		0.09	0.0543967		0.356		0.101		0.04		0.015		0	0	0	1	1
WASF2	WAS protein family, member 2	cytoplasm,cytoskeleton	9	0.09		0.21	0.0775486		#N/A		0.174	4	0.013		0.018		1	1	1	0	0
WDR43	WD repeat protein 43.	nucleus,nucleolus	2	0.1		0.127	0.0244742		0.184		0.112		0.021		0.013		0	0	0	0	0
XAGE1D	X antigen family, member 1D isoform 1c	intracellular	6	0.289		#N/A	0.0699191		#N/A		#N/A		#N/A		#N/A		0	0	0	0	0
YAP1	Yes-associated protein 1, 65kDa isoform 2	cytoplasm	1	0.074		0.15	0.0650923		0.299		0.157	4	0.007		0.015		1	1	1	0	0
YBX1	nuclease sensitive element binding protein 1	nucleus,nucleolus	2	0.3765	1	0.45	0.0590319		#N/A		#N/A		#N/A		#N/A		1	0	0	0	1
YTHDC1	splicing factor YT521-B isoform 1	nucleus	2	0.106		#N/A	0.0307997		0.41	3	#N/A		#N/A		#N/A		1	1	1	0	1
YWHAE	tyrosine 3/tryptophan 5 -monooxygenase	intracellular	6	0.28		#N/A	0.0623837		#N/A		#N/A		#N/A		#N/A		0	0	0	1	1
YY1	YY1 transcription factor	nucleus	2	0.221		0.17	0.051965		0.377		0.126		0.021		0.024	6	1	1	1	0	1
ZC3H4	zinc finger CCCH-type containing 4	nucleus	2	0.2055		#N/A	0.0397233		0.403	3	#N/A		#N/A		#N/A		1	1	1	0	0
ZFAND2A	zinc finger, AN1-type domain 2A	cytoplasm	1	0.062		0.347	0.0688686		0.258		0.047		0.02		0.01		0	0	0	0	0
											0.0363636

## Sheet: total protein
	frames	a frame was taken each 20 minutes - so 3 frames correspond to 1 hour)
Name	1	2	3	4	5	6	7	8	9	10	11	12	13	14	15	16	17	18	19	20	21	22	23	24	25	26	27	28	29	30	31	32	33	34	35	36	37	38	39	40	41	42	43	44	45	46	47	48	49
AA282714	1	0.99	1.04	1.04	1.02	1.03	1.04	1.04	0.92	0.96	0.96	0.98	0.96	0.87	0.9	0.96	0.96	0.97	0.98	0.96	0.83	0.77	0.76	0.87	0.91	0.91	0.89	0.87	0.89	0.89	0.9	0.92	0.94	0.96	0.94	0.93	0.91	0.91	0.94	0.93	0.94	0.97	0.97	0.97	0.97	0.96	0.96	0.95	0.93
ACOT7	1	1.02	1.03	1.005	0.98	1	1	0.995	1.015	1.015	1.02	1.03	1.035	1.045	1.06	1.065	1.065	1.075	1.075	1.08	1.09	1.09	1.095	1.095	1.075	1.075	1.07	1.075	1.085	1.09	1.11	1.11	1.11	1.115	1.125	1.12	1.12	1.115	1.11	1.115	1.115	1.095	1.07	1.065	1.065	1.07	1.055	1.06	1.06
actn4	1	1.03	0.9	0.84	0.94	0.93	0.93	0.93	0.96	1	1.03	1.05	1.01	0.97	0.98	0.98	0.98	0.98	0.95	0.94	0.91	0.9	0.89	0.89	0.9	0.91	0.9	0.9	0.91	0.87	0.85	0.82	0.83	0.85	0.92	0.91	0.93	0.89	0.91	0.88	0.93	0.98	1	0.92	0.83	0.83	0.84	0.85	0.85
ACTR1A	1	1	1	1.04	1	0.95	0.96	0.97	0.98	0.99	1.01	1.03	1.03	1.04	1.06	1.08	1.08	1.06	1.06	1.05	1.05	1.06	1.06	1.05	1.04	1.02	1.01	0.99	1.02	1.01	1.11	1.11	1.09	1.05	0.99	0.98	1.02	0.98	0.96	0.95	0.92	0.91	0.9	0.91	0.91	0.92	0.94	0.94	0.93
ACTR2	1	0.94	1.04	1.08	0.92	0.93	0.97	0.95	1.06	1.04	1	1.02	1.04	1.07	1.06	1.09	1.09	1.09	1.08	1.15	1.2	1.21	1.19	1.18	1.15	1.16	1.2	1.2	1.22	1.24	1.25	1.25	1.23	1.24	1.23	1.21	1.17	1.24	1.25	1.23	1.21	1.15	1.13	1.13	1.14	1.11	1.1	1.12	1.13
ACYP2	1	1	0.94	0.93	0.97	0.96	0.96	0.97	0.99	0.98	0.98	0.99	0.97	0.96	0.96	0.96	0.96	0.97	0.97	0.99	0.95	0.94	0.93	0.93	0.95	0.95	0.93	0.94	0.97	0.95	0.9	0.88	0.9	0.91	0.9	0.91	0.92	0.98	0.98	0.94	0.92	0.9	0.9	0.91	0.9	0.93	0.96	0.97	0.95
ADK	1	1.015	0.905	0.9	0.975	0.98	0.97	0.955	0.96	0.965	0.97	0.975	0.985	0.995	0.99	0.985	1.005	1.005	1.01	1.025	1.025	1.02	1.015	1.01	1	0.995	1	1.005	1.025	1.03	1.025	1.055	1.055	1.06	1.065	1.065	1.055	1.055	1.05	1.055	1.055	1.075	1.085	1.105	1.1	1.11	1.12	1.11	1.095
AF086125	1	1.01	1.05	1.12	1.05	1.06	1.09	1.06	1.02	1.02	0.98	0.97	0.96	0.96	0.96	0.97	0.98	1.08	1.09	1.14	1.13	1.08	1.07	1.12	1.11	1.08	1.1	1.11	1.16	1.14	1.13	1.12	1.15	1.14	1.15	1.15	1.17	1.15	1.19	1.19	1.22	1.2	1.28	1.27	1.29	1.28	1.28	1.28	1.26
AF087973	1	1	1.14	1.14	1.05	1.14	1.16	1.15	1.04	0.96	0.96	0.95	0.91	0.93	0.93	0.94	0.95	0.99	1	0.98	1.01	1.02	1.01	1.02	1	0.89	0.88	0.97	0.98	1.02	1.08	1.1	1.08	1.09	1.12	1.12	1.12	1.12	1.13	1.13	1.11	0.96	0.97	1.03	1.06	1.05	1.03	1.02	1.03
AI001881	1	0.9	0.86	0.92	0.88	0.91	0.92	0.94	0.94	0.95	1.02	1.02	0.99	0.99	1.03	1.08	1.06	1.05	1.03	1.04	1.07	1.07	1.05	1.09	1.08	1.04	1.01	1.02	1.05	1.03	1.02	1.03	1.04	1.05	1.05	1.04	1.03	1.05	1.08	1.1	1.08	1.08	1.1	1.15	1.18	1.16	1.11	1.07	1.07
AI208228	1	0.99	0.97	0.99	1.05	1.08	1.11	1.17	1.09	1.06	1.05	1.06	1.15	1.08	1.09	1.1	1.11	1.12	1.17	1.16	1.19	1.24	1.22	1.22	1.21	1.22	1.24	1.24	1.25	1.3	1.29	1.27	1.29	1.32	1.32	1.35	1.33	1.3	1.28	1.27	1.26	1.23	1.17	1.15	1.15	1.15	1.15	1.14	1.12
AI217733	1	1.02	1	0.96	0.95	0.96	0.96	0.95	0.95	0.96	0.96	0.98	0.97	0.98	0.97	0.96	0.98	1	1.01	1	0.99	0.99	0.99	1.01	1	0.99	1	0.99	0.99	0.98	0.98	0.99	1	1.01	1	1	0.99	0.97	0.98	0.98	0.99	0.99	0.99	0.98	0.98	0.98	0.97	0.96	0.97
AI342698	1	1	1.12	1.08	1.27	1.29	1.23	1.14	1.12	1.11	1.07	1.02	0.94	0.95	0.98	0.97	0.94	0.92	0.91	0.91	0.9	0.89	0.89	0.91	0.89	0.88	0.88	0.91	0.91	0.93	0.93	0.95	0.95	0.95	0.94	0.93	0.95	0.95	0.94	0.93	0.93	0.97	0.99	1	0.95	0.95	0.96	1	0.99
AI671392	1	0.97	0.98	1	0.93	0.93	0.95	0.97	0.96	0.94	0.92	0.96	0.96	0.95	0.95	0.94	0.94	0.94	0.95	0.97	0.98	0.97	0.98	0.98	0.98	0.97	0.99	1	1.01	1	0.99	1.02	1.05	1.06	1.06	1.07	1.06	1.06	1.05	1.07	1.08	1.08	1.07	1.07	1.07	1.09	1.09	1.09	1.09
AI733141	1	1.005	1.02	1.05	1.04	1.015	0.96	0.945	0.955	0.97	0.975	0.99	1	1	1	1.01	1.01	1.01	1.005	1.005	1	1.01	1	1.005	1	1.005	0.995	0.99	0.97	0.97	0.985	0.98	0.995	0.99	0.99	0.99	1.01	1.035	1.03	1.025	1.015	1	0.995	0.99	0.99	0.985	0.98	0.985	0.995
AI863545	1	0.81	0.74	0.82	0.78	0.76	0.75	0.73	0.74	0.72	0.73	0.74	0.75	0.76	0.77	0.76	0.82	0.81	0.77	0.76	0.67	0.65	0.61	0.65	0.65	0.64	0.71	0.66	0.65	0.67	0.68	0.67	0.66	0.68	0.65	0.74	0.77	0.79	0.85	0.94	0.92	0.92	0.93	0.93	0.93	0.93	1.01	1.01	1.02
AK022356	1	0.99	0.91	0.83	0.89	0.84	0.82	0.86	0.88	0.89	0.89	0.92	0.94	0.94	0.93	0.92	0.91	0.91	0.94	0.95	0.94	0.93	0.92	0.94	0.94	0.95	0.93	0.93	0.92	0.91	0.91	0.95	0.95	0.95	0.95	0.95	0.98	1	1	0.99	0.97	0.96	0.96	0.99	1	1	1	1.03	1.04
AK056115	1	0.95	1	1.1	1.05	1.06	1.09	1.22	1.4	1.4	1.4	1.23	1.23	1.2	1.2	1.19	1.2	1.24	1.25	1.24	1.35	1.35	1.36	1.36	1.37	1.31	1.26	1.2	1.17	1.27	1.34	1.3	1.27	1.24	1.2	1.19	1.13	1.16	1.1	1.09	1.07	1.28	1.25	1.29	1.25	1.18	1.21	1.2	1.32
AK091021	1	1.02	0.95	0.98	1.07	1.07	1.09	1.12	1.12	1.15	1.17	1.16	1.22	1.27	1.29	1.36	1.38	1.34	1.34	1.32	1.29	1.26	1.26	1.25	1.29	1.23	1.16	1.13	1.06	0.93	0.89	0.88	0.91	0.93	0.93	0.93	0.93	0.93	0.94	0.96	0.97	0.96	0.95	0.96	0.92	0.92	0.91	0.91	0.92
AK092541	1	1.01	1.08	1.09	0.99	0.98	0.97	0.97	0.99	1	1.02	1	1.02	1.03	1.02	1.02	1.05	1.05	1.07	1.07	1.06	1.02	1.02	1.03	1.06	1.08	1.1	1.1	1.11	1.12	1.11	1.08	1.14	1.13	1.13	1.13	1.12	1.12	1.12	1.1	1.12	1.12	1.11	1.1	1.09	1.08	1.08	1.09	1.11
AK094352	1	0.97	1.1	1.11	0.96	0.98	1.11	1.09	1.03	1.04	1.04	1.04	0.98	0.98	0.97	0.96	0.96	1.02	1.09	1.08	1.05	1	0.99	0.99	0.98	0.95	0.94	0.94	0.92	0.93	0.91	0.9	0.98	0.97	0.96	0.98	0.94	0.93	0.92	0.94	0.96	1	1.06	1.05	1.05	1.05	1.08	1.06	1.1
AK094903	1	0.98	1.05	1.04	1.02	1.02	1.01	1.02	0.99	0.97	0.96	0.96	0.95	0.96	0.96	0.96	1	1.03	1.03	1.03	1.05	1.04	1	1	1.02	1.03	1.02	1	0.98	0.98	1	1	0.99	1.01	1.02	1.01	0.99	0.95	0.94	0.94	0.96	0.98	0.99	1	0.99	0.99	0.96	0.95	0.96
AK097571	1	1.02	1.08	1.06	1.04	1.08	1.06	1.07	1.11	1.11	1.09	1.09	1.22	1.35	1.42	1.39	1.3	1.38	1.42	1.42	1.39	1.48	1.43	1.43	1.41	1.39	1.42	1.43	1.42	1.37	1.34	1.33	1.26	1.27	1.26	1.25	1.31	1.31	1.29	1.27	1.27	1.24	1.22	1.2	1.19	1.17	1.17	1.17	1.16
AK097658	1	1.02	1.04	1.02	1.03	1.05	1.04	1.05	1.05	1.09	1.13	1.11	1.08	1.07	1.08	1.08	1.07	1.07	1.07	1.07	1.08	1.12	1.12	1.11	1.13	1.13	1.14	1.17	1.15	1.14	1.15	1.15	1.15	1.15	1.15	1.13	1.14	1.14	1.16	1.17	1.17	1.17	1.16	1.17	1.16	1.15	1.17	1.16	1.15
AK127877	1	1.02	0.97	0.92	0.95	0.93	0.91	0.89	0.92	0.94	0.95	0.95	0.95	0.97	0.97	0.98	0.99	0.99	0.99	1.02	1.02	1.03	1.03	1.02	1	0.99	1.01	1.03	1	1.07	1.09	1.1	1.13	1.14	1.12	1.13	1.09	1.08	1.06	1.04	1.02	1.05	1.03	1.03	1.01	1.02	1.02	1.01	1.06
AKAP8L	1	0.975	1.09	1.155	1.11	1.085	1.025	1.035	1.025	1.01	1	1.02	1.02	1.01	1.005	1.01	1.025	1.04	1.085	1.08	1.085	1.105	1.1	1.08	1.11	1.105	1.11	1.18	1.175	1.165	1.145	1.13	1.13	1.155	1.15	1.14	1.12	1.115	1.11	1.115	1.115	1.11	1.075	1.07	1.055	1.055	1.06	1.06	1.06
ALDH3B1	1	0.99	1.01	1.03	1.07	1.09	1.11	1.12	1.12	1.11	1.07	1.06	1.01	0.97	0.89	0.84	0.83	0.79	0.83	0.9	0.87	0.82	0.81	0.79	0.8	0.81	0.76	0.75	0.79	0.84	0.85	0.87	0.87	0.89	0.87	0.85	0.84	0.85	0.86	0.85	0.86	0.85	0.82	0.81	0.79	0.78	0.81	0.83	0.94
ANLN	1	1.015	1.065	1.055	1.035	1.045	1.01	0.975	0.935	0.9	0.865	0.835	0.81	0.775	0.745	0.73	0.73	0.735	0.715	0.69	0.665	0.66	0.66	0.66	0.665	0.67	0.675	0.665	0.67	0.685	0.68	0.68	0.695	0.7	0.71	0.72	0.725	0.735	0.74	0.75	0.765	0.77	0.77	0.77	0.78	0.785	0.8	0.815	0.82
ANXA2	1	1.02	1.02	1.0633	1.1667	1.1533	1.06	0.9733	0.9333	0.9133	0.8867	0.8433	0.8333	0.85	0.8867	0.8933	0.9533	0.93	0.88	0.8667	0.8767	1.03	1.0233	1.0233	1.0367	1.0433	1.0367	1.0333	1.0267	0.9933	1	0.99	0.98	0.9933	1.0167	0.9867	1.0033	0.9933	0.99	0.97	0.9567	0.95	0.95	0.9533	0.9567	0.96	0.98	0.9933	0.9933
APLP2	1	1.03	0.98	0.96	1.01	1.03	1.03	1.02	1	1.02	1.02	1.02	0.99	0.97	0.98	0.97	0.96	0.96	0.95	0.93	0.92	0.92	0.91	0.91	0.9	0.88	0.88	0.88	0.89	0.87	0.84	0.86	0.86	0.86	0.88	0.89	0.89	0.89	0.9	0.9	0.89	0.9	0.91	0.91	0.92	0.94	0.94	0.95	0.95
ARID1B	1	0.9633	1.0333	1.0433	1.0367	1.0167	1.0433	1.04	1.0533	1.0367	1.0133	1.01	1.0367	1.0367	1.0367	1.02	1.03	1.05	1.05	1.06	1.06	1.03	1.06	1.0633	1.0667	1.0633	1.0667	1.0767	1.09	1.0733	1.07	1.1033	1.1233	1.1267	1.1367	1.1267	1.1333	1.15	1.1567	1.2133	1.2333	1.24	1.2267	1.2333	1.2233	1.2367	1.2333	1.2367	1.2367
ARL3	1	1.02	1.025	1.04	1.075	1.105	1.105	1.105	1.095	1.115	1.085	1.095	1.105	1.095	1.09	1.075	1.055	1.055	1.065	1.07	1.06	1.075	1.07	1.08	1.095	1.12	1.135	1.13	1.155	1.15	1.13	1.125	1.145	1.145	1.145	1.14	1.13	1.115	1.105	1.115	1.125	1.135	1.16	1.17	1.16	1.145	1.14	1.14	1.135
ARL6IP1	1	1.03	0.97	0.78	0.87	0.91	0.93	0.97	0.99	1	1	1	0.95	0.94	0.95	0.97	0.97	0.95	0.95	0.93	0.92	0.9	0.89	0.89	0.87	0.88	0.87	0.86	0.87	0.95	0.95	0.95	0.96	0.96	0.96	0.96	0.96	0.96	0.96	0.89	0.89	0.89	0.89	0.89	0.89	0.9	0.9	0.89	0.9
ARPC1A	1	1.03	1.02	0.98	0.99	1.02	1.03	1.04	1.06	1.08	1.07	1.08	1.09	1.1	1.1	1.08	1.05	1.04	1.04	1.04	1.08	1.1	1.09	1.09	1.08	1.08	1.07	1.1	1.09	1.07	1.08	1.1	1.09	1.07	1.06	1.06	1.06	1.04	1.05	1.04	1.02	1	1	0.99	1	1	0.99	1	0.99
ARPC2	1	1.02	1.07	1.07	1.03	0.97	0.96	0.95	0.94	0.95	0.95	0.96	0.98	0.98	0.98	0.97	0.96	0.97	0.96	0.96	0.95	0.96	0.97	0.96	0.95	0.95	0.95	0.93	0.92	0.92	0.91	0.89	0.88	0.9	0.91	0.92	0.9	0.91	0.92	0.91	0.91	0.91	0.93	0.94	0.94	0.94	0.94	0.96	0.97
ARPC3	1	1.01	1.01	1	1.02	1	1.01	1.01	1.02	1.03	1.04	1.07	1.1	1.1	1.14	1.14	1.12	1.11	1.11	1.12	1.1	1.09	1.08	1.08	1.06	1.07	1.07	1.1	1.09	1.09	1.07	1.1	1.09	1.06	1.05	1.05	1.04	1.04	1.04	1.02	1.01	1.01	1.02	1.02	1.02	1.03	1.02	1.03	1.03
ATF1	1	0.99	1.05	1.06	1.12	1.16	1.25	1.32	1.33	1.22	1.17	1.15	1.14	1.12	1.15	1.15	1.16	1.15	1.16	1.2	1.18	1.22	1.15	1.11	1.1	1.06	1.03	1.03	1.03	1.01	1.01	1.01	1.01	1.01	1.02	1.04	1.04	1.02	0.99	0.96	0.99	1.01	1.13	1.15	1.2	1.18	1.14	1.1	1.1
ATG3	1	0.99	1.01	1.01	1.04	1.04	1.04	1.04	1.08	1.11	1.12	1.07	1.06	1.07	1.07	1.08	1.08	1.08	1.15	1.14	1.13	1.13	1.14	1.13	1.13	1.12	1.11	1.11	1.07	1.09	1.08	1.05	1.09	1.09	1.15	1.14	1.14	1.17	1.13	1.11	1.11	1.1	1.07	1.08	1.1	1.12	1.11	1.1	1.13
ATP5C1	1	1.01	1.04	0.99	0.96	0.97	0.97	0.98	0.98	0.97	0.99	1	1	0.99	0.99	1	1	0.99	0.99	0.98	0.99	0.98	0.98	0.97	0.96	0.97	0.96	0.93	0.94	0.95	0.95	0.95	0.96	0.95	0.98	0.98	0.98	0.94	0.95	0.96	0.97	0.95	0.94	0.94	0.94	0.93	0.95	0.94	0.93
ATP5J2	1	1.03	0.99	0.91	0.97	0.99	1.01	1.01	1.03	1.05	1.06	1.06	1.05	1.06	1.07	1.08	1.08	1.08	1.07	1.07	1.08	1.08	1.08	1.09	1.11	1.11	1.1	1.09	1.09	1.1	1.09	1.09	1.09	1.1	1.08	1.09	1.08	1.09	1.09	1.08	1.08	1.05	1.05	1.05	1.05	1.07	1.03	1.02	1.01
AV741821	1	1.02	0.93	0.89	0.95	0.93	0.93	0.96	0.99	1.02	1.02	1.03	1.05	1.06	1.09	1.07	1.07	1.07	1.07	1.02	1.04	1.04	1.07	1.02	1.01	1.02	1.01	1.04	1.05	1.05	1.05	1.05	1.04	1.03	1.04	1.06	1.08	1.05	1.03	1.04	1.04	1.04	1.02	1.04	1.03	1.02	0.99	0.99	0.98
AW418496	1	1	1.02	1.03	1.14	1.13	1.09	1.09	1.06	1.07	1.06	1.11	1.08	1.09	1.05	1.03	1	1.01	1.01	0.99	0.98	0.99	1	1.03	1.02	1.02	1.02	1.01	1.01	0.99	1.02	1.03	1.06	1.09	1.02	0.99	0.95	0.98	1.02	1.05	1.09	1.09	1.09	1.09	1.08	1.14	1.12	1.11	1.13
AX748230	1	1.015	0.955	0.925	0.925	0.935	0.935	0.96	1.03	1.025	0.985	0.965	0.945	0.92	0.915	0.925	0.92	0.91	0.915	0.92	0.93	0.94	0.935	0.935	0.94	0.91	0.885	0.88	0.89	0.885	0.875	0.88	0.875	0.88	0.875	0.87	0.88	0.88	0.875	0.86	0.855	0.86	0.85	0.855	0.855	0.875	0.88	0.895	0.915
AY480055	1	1.01	1.14	1.23	1.03	1.01	1	0.95	0.93	0.92	0.92	0.94	0.95	0.97	1.01	1.02	1.04	1.03	1.03	1.03	0.99	0.96	0.97	0.96	0.96	0.94	0.97	0.99	1.03	1	0.99	0.96	0.97	0.96	0.94	0.97	1	0.99	0.97	0.95	0.95	0.96	0.97	0.99	1	1	1.01	1.01	1.01
BAG1	1	0.9933	0.9133	0.8833	0.8133	0.78	0.7833	0.7767	0.7733	0.7733	0.7867	0.8	0.8467	0.8967	0.8733	0.9667	0.9967	1.0267	1.0133	0.9933	0.95	0.9267	0.8567	0.8433	0.8467	0.8267	0.8267	0.83	0.8333	0.83	0.7767	0.7833	0.79	0.7967	0.79	0.8033	0.7967	0.8633	0.8733	0.8767	0.8867	0.8833	0.9067	0.96	0.95	0.8767	0.85	0.8233	0.8167
BAG2	1	0.99	1.085	1.1	1.0975	1.12	1.1075	1.12	1.105	1.095	1.11	1.11	1.0925	1.075	1.06	1.0825	1.0825	1.075	1.0575	1.05	1.065	1.0775	1.0775	1.0725	1.0725	1.08	1.0775	1.04	1.0075	1.0125	1.015	1.01	0.9875	0.98	0.955	0.9475	0.9525	0.9825	0.9725	0.9775	0.9575	0.94	0.915	0.9175	0.915	0.9325	0.9525	0.96	0.9775
BAG3	1	1.03	1.22	1.21	1.44	1.5	1.67	1.66	1.59	1.46	1.19	1.25	1.24	1.22	1.2	1.18	1.21	1.23	1.16	1.15	1.16	1.21	1.23	1.3	1.3	1.31	1.27	1.24	1.36	1.36	1.35	1.34	1.33	1.33	1.28	1.21	1.18	1.17	1.19	1.2	1.18	1.16	1.15	1.12	1.1	1.11	1.11	0.99	0.99
BANK1	1	0.95	1.01	0.97	0.96	1.07	1.13	1.13	1.13	1.13	1.1	1.05	1.01	1.03	1.1	1.09	1.08	1.08	1.06	1.03	1.02	1.02	1.04	1.04	1.01	1.01	0.98	0.98	0.97	0.98	1.01	1	1.02	1.03	1.01	1	0.99	0.98	0.97	0.96	1.03	1.04	1.05	1.05	1.04	1.03	1.02	1	1
BC039104	1	1.0067	0.91	0.8467	0.9033	0.8767	0.8833	0.88	0.8667	0.87	0.8667	0.8867	0.9	0.8967	0.91	0.92	0.9	0.8933	0.8867	0.8767	0.89	0.9	0.9067	0.92	0.91	0.93	0.94	0.96	0.9633	0.9533	0.9433	0.94	0.9233	0.9133	0.92	0.9433	0.9333	0.9033	0.9167	0.9067	0.91	0.9167	0.9333	0.9367	0.9467	0.9367	0.9333	0.92	0.91
BC042855	1	1.02	0.87	0.91	0.98	0.97	0.93	0.91	0.86	0.88	0.89	0.93	0.96	0.94	0.92	0.92	1.02	1.05	1.04	1.07	1.06	1.1	1.09	1.05	1.02	1.08	1.06	1.04	1.03	1.08	1.09	1.09	1.12	1.16	1.22	1.16	1.14	1.09	1.08	1.08	1.06	1.08	1.05	1.04	1.1	1.13	1.11	1.12	1.09
BC044741	1	0.99	1.04	1.08	1	0.96	1	0.99	1.01	1.02	1.05	1.07	1.05	1.05	1.06	1.03	1	0.97	0.99	1.01	1.03	1.03	1.02	1.11	1.14	1.17	1.19	1.22	1.23	1.22	1.18	1.18	1.19	1.18	1.16	1.08	1.07	1.06	1.06	1.05	1.04	1.11	1.1	1.09	1.06	1.08	1.1	1.11	1.1
BC048993	1	0.96	0.88	0.91	0.99	1.02	1.06	1.07	1.06	1	1.06	1.08	1.08	1.1	1.11	1.11	1.13	1.13	1.13	1.13	1.13	1.12	1.12	1.12	1.12	1.08	1.08	1.1	1.12	1.13	1.12	1.11	1.1	1.11	1.1	1.09	1.07	1.05	1.03	1	1.01	1.02	1.03	1.03	0.98	1	1	1	1.01
BCCIP	1	1.02	0.88	0.71	0.63	0.56	0.71	0.96	1.11	1.19	1.1	0.88	1.13	1.16	1.19	1.19	1.54	1.49	1.29	1.29	1.46	1.46	1.6	1.59	1.58	1.66	1.64	1.59	1.59	1.59	1.58	1.6	1.59	1.57	1.54	1.51	1.51	1.48	1.46	1.43	1.41	1.4	1.42	1.41	1.4	1.38	1.35	1.33	1.3
BE043072	1	0.97	0.86	0.91	0.93	0.9	0.89	0.99	1.01	1.01	1.01	0.99	0.98	0.98	0.96	0.96	0.97	0.96	0.95	0.95	0.94	0.93	0.96	1	1.01	0.97	0.95	0.93	0.95	1.02	1.01	1	1.03	1.01	0.99	0.99	1.02	1.04	1.05	1.06	1.07	1.06	1.09	1.07	1.1	1.12	1.1	1.1	1.09
BE048560	1	0.98	0.84	0.83	0.94	1	1.03	1.03	1	1	1	1	1.01	1.01	1.04	1.04	1.03	1.03	1.02	1	1	0.98	1.09	1.08	1.07	1.06	1.04	1.04	1.05	1.04	1.05	1.1	1.09	1.09	1.1	1.09	1.07	1.12	1.12	1.11	1.1	1.17	1.16	1.13	1.13	1.14	1.11	1.09	1.08
BE785612	1	0.9567	0.9467	0.96	0.9667	0.9667	0.9733	0.99	1.0033	1.02	1.0367	1.03	1.01	1.01	1	0.94	0.92	0.93	0.92	0.9267	0.9067	0.93	0.93	0.9233	0.9367	0.9333	0.94	0.93	0.92	0.9067	0.9033	0.8967	0.8933	0.8933	0.8933	0.86	0.8633	0.8733	0.8667	0.88	0.8767	0.8667	0.8633	0.86	0.8633	0.87	0.89	0.9	0.9633
BEST3	1	1.01	1.13	1.13	1.03	1.04	1	0.99	0.99	1	1	1.03	1.03	1.03	1.03	1.03	1.04	1.05	1.05	1.06	1.07	1.09	1.07	1.08	1.07	1.07	1.07	1.07	1.04	1.07	1.07	1.08	1.09	1.09	1.08	1.08	1.08	1.07	1.05	1.02	1.02	1.01	1.02	1.04	1.04	1.04	1.03	1.03	1.06
BF062994	1	1.08	1.07	0.88	1	1.04	1.02	1.03	0.98	0.99	0.97	0.98	0.98	1	1	0.99	0.98	1	1	1	0.99	0.98	0.98	0.98	0.92	0.92	0.94	0.95	0.94	0.93	0.92	0.91	0.9	0.89	0.89	0.89	0.88	0.86	0.85	0.84	0.83	0.77	0.77	0.8	0.8	0.79	0.8	0.8	0.79
BF594738	1	0.985	0.9	0.91	0.95	0.945	0.94	0.945	0.95	0.955	0.955	0.95	0.99	0.96	0.97	0.995	0.965	0.945	0.98	0.985	0.99	0.97	0.96	0.955	0.95	0.94	0.95	0.94	0.935	0.925	0.925	0.94	0.945	0.945	0.945	0.945	0.94	0.95	0.945	0.935	0.93	0.93	0.925	0.925	0.93	0.935	0.94	0.945	0.955
BF688062	1	0.99	0.98	0.935	0.925	0.925	0.935	0.935	0.915	0.91	0.925	0.965	0.98	1.005	1	1.015	1.055	1.07	1.07	1.09	1.085	1.09	1.105	1.115	1.14	1.135	1.12	1.08	1.09	1.105	1.07	1.035	1.02	1.025	0.995	1.035	1.04	1.04	1	1.005	1.01	1.03	1.075	1.115	1.115	1.025	0.995	0.99	0.985
BG203790	1	1	0.95	0.93	0.99	0.94	0.95	0.97	0.99	1.01	1.04	1.05	1.06	1.07	1.09	1.14	1.15	1.16	1.16	1.13	1.13	1.13	1.12	1.12	1.12	1.11	1.1	1.1	1.09	1.08	1.1	1.08	1.09	1.1	1.1	1.1	1.09	1.09	1.09	1.09	1.08	1.08	1.08	1.07	1.06	1.05	1.03	1.02	1.03
BG221753	1	0.97	1	1.05	0.96	0.99	1.01	1.01	1.03	1.05	1.04	1.09	1.1	1.09	1.1	1.09	1.08	1.08	1.04	1.04	1.04	1.04	1.08	1.09	1.09	1.1	1.1	1.08	1.1	1.11	1.11	1.12	1.12	1.11	1.11	1.1	1.14	1.13	1.14	1.12	1.12	1.15	1.1	1.09	1.09	1.09	1.1	1.09	1.07
BG505700	1	0.98	0.97	0.96	0.99	0.91	0.92	1.01	1.02	0.99	0.97	0.95	0.93	0.93	0.94	0.95	0.95	0.95	0.96	0.96	0.96	0.95	0.95	0.95	0.94	0.97	0.97	0.95	0.94	0.92	0.91	0.92	0.92	0.91	0.9	0.89	0.95	0.94	0.99	1.02	1.01	1.01	1	1.01	1.01	0.99	1	1.02	1.01
BI462136	1	1.02	1.15	1.07	1.1	0.99	0.99	1	1.02	1.05	1.07	1.1	1.11	1.14	1.11	1.12	1.12	1.1	1.1	1.11	1.08	1.09	1.09	1.09	1.08	1.05	1.07	1.09	1.09	1.01	1.02	0.97	0.97	0.94	0.99	1.01	0.99	0.95	0.94	0.94	0.95	0.95	0.95	0.95	0.96	0.97	0.98	0.98	0.91
BI762388	1	1.01	1.05	1.05	1.13	1.08	1.09	1.1	1.09	1.08	1	1	1.07	1.07	1.07	1.09	1.04	1.01	1.04	0.99	0.97	0.96	0.96	0.96	0.96	0.95	0.99	0.97	0.95	0.96	0.96	0.96	0.97	0.99	0.98	0.98	1.03	1.03	1.02	0.97	0.95	0.92	0.92	0.93	0.94	0.94	0.94	0.93	0.93
BM461531	1	0.975	0.99	0.94	0.97	0.95	0.965	0.97	0.98	0.985	0.985	0.985	0.995	1.005	0.98	0.945	0.935	0.935	0.94	0.95	0.935	0.94	0.93	0.935	0.92	0.925	0.925	0.93	0.92	0.915	0.905	0.905	0.91	0.915	0.91	0.91	0.915	0.92	0.93	0.915	0.915	0.925	0.93	0.94	0.965	0.975	0.985	0.99	0.97
BM681834	1	0.94	0.88	0.89	0.93	0.95	1	1.06	1.06	1.06	1.18	1.2	1.15	1.14	1.23	1.26	1.22	1.15	1.16	1.19	1.14	1.16	1.21	1.2	1.36	1.36	1.36	1.37	1.32	1.3	1.4	1.2	1.16	1.13	1.17	1.41	1.5	1.46	1.37	1.26	1.27	1.26	1.33	1.29	1.25	1.23	1.27	1.34	1.35
BM684766	1	1.01	1.12	1.09	0.88	0.87	0.88	0.9	0.9	0.89	0.89	0.91	0.93	0.92	0.88	0.88	0.88	0.89	0.88	0.94	0.94	0.9	0.87	0.91	0.9	0.92	0.96	0.95	0.96	0.99	1	0.99	0.96	0.98	1	1	0.97	0.99	0.98	0.96	0.93	0.93	0.91	0.91	0.9	0.89	0.84	0.82	0.81
bpl 41-16	1	1.03	0.95	0.93	0.95	0.93	0.93	0.94	0.95	0.95	0.96	0.94	0.93	0.93	0.92	0.93	0.94	0.93	0.98	1	0.96	0.96	0.95	0.96	0.96	0.94	0.95	0.92	0.91	0.91	0.91	0.88	0.88	0.87	0.85	0.88	0.88	0.88	0.9	0.9	0.9	0.9	0.89	0.9	0.93	0.92	0.92	0.93	0.92
BRMS1	1	1.03	1.19	1.27	1.41	1.36	1.23	1.19	1.21	1.16	1.11	1.1	1.11	1.1	1.1	1.1	1.12	1.09	1.08	1.07	1.18	1.16	1.27	1.22	1.1	1.09	1.1	1.1	1.08	1.07	1.07	1.12	1.18	1.17	1.16	1.15	1.15	1.16	1.15	1.15	1.13	1.22	1.2	1.19	1.18	1.25	1.24	1.17	1.11
BSG	1	1.02	1.07	1.03	1.01	1	1.01	1	1.02	1.04	1.05	1.06	1.06	1.05	1.04	1.07	1.07	1.08	1.08	1.08	1.07	1.07	1.08	1.08	1.07	1.08	1.09	1.09	1.08	1.08	1.08	1.07	1.07	1.08	1.07	1.05	1.06	1.06	1.07	1.07	1.07	1.09	1.1	1.08	1.08	1.06	1.05	1.05	1.04
BTK	1	1	0.99	1	0.98	0.97	0.97	1.02	1.02	0.96	0.97	0.98	0.98	0.98	0.96	0.94	0.94	0.94	0.94	0.93	0.93	0.93	0.92	0.91	0.91	0.89	0.91	0.95	0.96	0.95	0.91	0.87	0.85	0.85	0.86	0.86	0.89	0.89	0.89	0.87	0.86	0.86	0.86	0.84	0.84	0.85	0.89	0.92	0.91
BU568189	1	1.02	0.98	0.88	0.93	0.94	0.95	0.96	0.96	0.97	0.97	0.97	0.97	0.99	0.99	0.99	0.99	0.99	0.98	0.98	0.96	0.96	0.99	1.02	1.02	1.02	1.01	0.99	1.02	1.01	1.03	1.04	1.03	1.03	1.03	1.03	1.03	1.03	1.12	1.1	1.12	1.11	1.12	1.14	1.14	1.11	1.11	1.14	1.1
BU607353	1	0.9	0.78	0.8	0.9	0.89	0.88	0.88	0.9	0.89	0.9	0.92	0.95	1.05	1.16	1.19	1.07	1.11	1.04	0.99	1.04	1.13	1.13	1.1	0.91	0.73	0.73	0.72	0.72	0.76	0.73	0.73	0.76	0.75	0.79	0.77	0.77	0.75	0.77	0.84	0.84	0.82	0.82	0.91	0.92	0.96	1.01	1.01	1.02
BU630466	1	1.01	1.07	1.04	1.03	1.12	1.13	1.12	1.02	0.93	0.9	0.92	0.94	0.95	0.92	0.92	0.98	0.99	0.98	0.96	0.95	0.93	0.92	0.93	0.9	0.88	0.9	0.92	0.96	0.94	0.88	0.88	0.89	0.93	0.97	0.96	0.92	0.93	0.95	0.96	0.96	0.96	0.97	0.96	0.94	0.98	1.04	1.01	0.99
BX090666	1	1.04	0.96	0.89	0.94	0.97	0.97	0.97	0.98	1.01	1.01	1.02	1.03	1.03	1.04	1.06	1.07	1.08	1.08	1.06	1.05	1.03	1.03	1.02	1	0.98	0.96	0.97	0.98	0.98	0.99	1	1	1	1.03	1.04	1.03	0.99	0.97	0.97	0.96	0.95	0.94	0.94	0.94	0.94	0.94	0.95	0.94
BX100818	1	0.99	1.04	1.05	0.99	0.99	0.98	0.99	1	1.01	1	1.01	1.01	1	1.02	1.03	1.03	1.03	1.03	1.02	1.02	1.03	1.03	1.04	1.03	1.02	1	0.99	0.98	0.97	0.97	0.97	0.97	0.98	1	1	1.01	0.99	1	1	1	0.99	0.99	0.99	0.99	1	1	1	0.99
BX104605	1	1.035	0.985	0.95	0.98	0.995	1.005	1.01	1.03	1.05	1.045	1.055	1.065	1.06	1.05	1.065	1.05	1.045	1.045	1.025	1.015	0.99	0.985	0.98	0.96	0.965	0.95	0.935	0.935	0.915	0.9	0.9	0.9	0.915	0.925	0.955	0.94	0.94	0.93	0.93	0.94	0.935	0.925	0.93	0.95	0.97	0.98	1.005	1
BX537644	1	1.03	0.97	0.94	0.97	1.01	1.01	1.01	1	1.01	1.03	1.05	1.06	1.05	1.07	1.07	1.06	1.07	1.06	1.08	1.09	1.1	1.1	1.13	1.1	1.11	1.11	1.1	1.09	1.07	1.05	1.04	1.02	1.01	1	0.98	0.99	1.02	0.98	1.01	1.03	1.04	1.06	1.05	1.06	1.04	1.01	1.01	1.02
C12orf45	1	1.02	1.04	0.98	0.99	1.02	1.05	1.11	1.08	1.06	1.05	1.05	1.06	1.05	1.06	1.06	1.09	1.09	1.12	1.14	1.15	1.16	1.18	1.15	1.15	1.17	1.16	1.16	1.16	1.18	1.22	1.24	1.18	1.18	1.17	1.16	1.15	1.16	1.15	1.13	1.13	1.12	1.14	1.14	1.14	1.13	1.14	1.12	1.1
C14orf112	1	1	1.01	1.06	1.1	1.05	1	1.02	1.04	1.04	1.06	1.02	0.95	0.97	0.98	0.97	0.94	1.01	1.02	1.01	0.98	0.95	0.94	0.92	0.97	0.97	0.93	0.98	0.99	1	1	0.97	0.96	0.97	0.95	0.96	0.95	0.92	0.91	0.93	0.97	0.98	0.94	0.95	0.96	0.95	0.96	1	0.99
C14orf166	1	0.99	1	0.98	1.08	1.09	1.1	1.14	1.15	1.16	1.15	1.14	1.1	1.1	1.12	1.11	1.11	1.08	1.09	1.09	1.07	1.06	1.04	1.04	1.05	1.05	1.05	1.04	1.04	1.02	1.03	1.01	1.04	1.05	1.09	1.08	1.05	1.04	1.01	1.01	1.02	1.02	1.02	1.08	1.07	1.07	1.08	1.09	1.07
C14orf2	1	1.02	0.9	0.89	0.98	0.98	0.95	0.95	0.96	0.99	1	0.99	1	0.99	0.97	0.97	0.98	0.97	0.96	0.95	0.96	0.96	1.02	1.05	1.06	1.04	1.02	1	1.04	1.04	1.04	1.06	1.08	1.08	1.08	1.08	1.07	1.06	1.05	1.04	1.03	1.06	1.06	1.06	1.08	1.1	1.13	1.14	1.14
C19orf43	1	0.99	1.03	1.12	0.88	0.87	0.87	0.87	0.86	0.83	0.81	0.79	0.77	0.74	0.73	0.68	0.67	0.67	0.71	0.7	0.72	0.7	0.68	0.66	0.62	0.61	0.63	0.63	0.81	0.8	0.76	0.76	0.84	0.84	1	0.98	0.94	0.94	0.98	1.02	1.05	1.13	1.12	1.11	1.13	1.13	1.26	1.25	1.29
c19orf53	1	1.01	0.96	0.98	1.04	1.05	1.07	1.1	1.14	1.19	1.19	1.18	1.18	1.17	1.16	1.16	1.13	1.1	1.13	1.15	1.15	1.14	1.11	1.14	1.14	1.13	1.11	1.1	1.11	1.07	1.15	1.12	1.09	1.11	1.08	1.07	1.07	1.1	1.1	1.09	1.11	1.11	1.11	1.09	1.06	1.06	1.1	1.11	1.11
C1orf121	1	1	1.08	1.09	0.99	1.01	1.02	1.04	1.07	1.07	1.07	1.08	1.1	1.12	1.12	1.11	1.13	1.13	1.16	1.15	1.14	1.15	1.14	1.14	1.07	1.06	1.05	1.06	1.07	1.04	1.04	1.06	1.05	1.04	1.03	1	0.97	1.04	1.13	1.15	1.12	1.1	1.11	1.11	1.13	1.12	1.14	1.17	1.18
C1QBP	1	1.0167	0.96	0.88	0.94	1.01	1.0133	0.9733	0.9033	0.8333	0.8067	0.8167	0.8167	0.8167	0.81	0.83	0.8367	0.85	0.9067	0.9133	0.88	0.86	0.8433	0.84	0.86	0.8433	0.8167	0.8367	0.8467	0.8767	0.89	1.0133	1.01	0.9733	0.9233	0.9	0.9033	0.9167	0.9167	0.9167	0.9133	0.9067	0.8933	0.8767	0.8833	0.89	0.9567	0.9933	1.0233
c21orf59	1	0.93	0.76	0.77	0.79	0.83	0.83	0.84	0.86	0.89	0.89	0.91	0.92	0.93	0.9	0.91	0.91	0.91	0.9	0.91	0.92	0.9	0.91	0.92	0.91	0.91	0.93	0.95	0.96	0.97	0.97	0.97	0.98	0.99	0.98	0.97	0.98	0.97	0.96	0.96	0.96	0.97	0.97	0.97	0.97	0.96	0.96	0.96	0.96
C22orf16	1	0.99	0.95	0.98	0.96	0.97	0.98	0.94	0.94	0.93	0.95	0.98	1.01	1.04	1.02	0.98	0.99	1	0.99	1.02	1.02	1	1	1.01	1.06	1.06	1.04	1.08	1.09	1.11	1.07	1.05	1.02	1.01	1	0.98	1.04	1.03	1.03	1.02	1.04	1.05	1.04	1.04	1.04	1.09	1.07	1.08	1.09
C2orf25	1	1.01	1.08	1.05	1.01	1.01	1.02	1.06	1.07	1.07	1.08	1.09	1.08	1.1	1.08	1.09	1.09	1.1	1.06	1.05	1.04	1.05	1.05	1.06	1.05	1.04	1.03	1.02	1	1	1.01	1.01	0.99	0.98	0.98	0.97	0.97	0.99	1.02	1.03	1	1	0.99	1	0.99	1	1.04	1.04	1.06
C3ORF19	1	1.015	0.92	0.915	0.945	0.97	0.98	1	0.99	1	1	1.01	1.015	1.01	1	1	1.005	0.99	1.01	1.005	1.005	0.99	0.995	0.985	0.98	0.975	0.985	0.99	0.99	0.97	0.975	0.98	0.985	0.995	0.995	0.97	0.96	0.985	0.965	0.945	0.955	0.955	0.965	0.955	0.94	0.935	0.925	0.93	0.94
C7orf11	1	0.98	0.96	1	1	0.98	1.01	1.05	1.04	1.06	1.11	1.08	1.09	1.08	1.1	1.07	1.09	1.11	1.13	1.14	1.11	1.09	1.09	1.1	1.1	1.09	1.07	1.06	1.06	1.1	1.08	1.08	1.07	1.08	1.05	1.03	1.01	1.02	0.99	0.98	1.01	1.03	1.03	1.05	1.04	1.02	1.01	1.01	0.99
C8orf53	1	1.01	1.01	0.93	0.99	1.01	1.03	1.03	1.04	1.04	1.04	1.08	1.1	1.17	1.21	1.21	1.21	1.2	1.16	1.11	1.13	1.12	1.11	1.13	1.15	1.1	1.14	1.15	1.15	1.18	1.18	1.17	1.18	1.18	1.18	1.19	1.21	1.2	1.19	1.19	1.2	1.19	1.16	1.15	1.14	1.13	1.14	1.13	1.14
C9orf40	1	0.97	0.98	1.005	0.955	0.955	0.955	0.955	0.945	0.97	0.95	0.965	1.015	1.01	1.025	1.015	1.025	1.005	0.99	0.985	0.975	0.98	1	1	0.995	0.99	0.985	1	1.06	1.075	1.07	1.06	1.065	1.08	1.08	1.075	1.035	1.04	1.035	1.025	1.025	1.03	1.03	1.06	1.06	1.065	1.065	1.075	1.09
CA418524	1	0.98	1.08	1.05	0.94	0.95	1	1.02	1.02	1.01	1.01	1	0.96	0.96	0.97	0.99	1.07	1.09	1.09	1.09	1.09	1.14	1.19	1.19	1.15	1.14	1.17	1.19	1.21	1.21	1.21	1.21	1.2	1.19	1.18	1.18	1.19	1.19	1.14	1.14	1.11	1.1	1.12	1.11	1.09	1.07	1.06	1.07	1.06
CA430002	1	0.96	0.82	0.85	0.87	0.86	0.86	0.82	0.8	0.84	0.87	0.97	1.01	1.06	1.04	1.02	1.03	1.05	1.02	1.01	1	1	0.99	1	1.01	0.99	1.02	1.09	1.1	1.08	1.03	1.04	1.06	1.13	1.1	1.1	1.11	1.12	1.13	1.16	1.13	1.12	1.11	1.1	1.08	1.08	1.07	1.09	1.11
CACNA2D1	1	1.02	1.09	1.11	1	1.09	1.11	0.99	0.81	0.93	0.99	1.05	1.06	1.07	1.02	1	1.05	1.07	1.16	1.18	1.21	1.46	1.46	1.4	1.07	1.06	1.08	1.07	1.01	1.08	1.08	1.09	1.09	1.11	1.1	1.09	1.09	1.11	1.14	1.29	1.6	1.57	1.53	1.47	1.47	1.5	1.51	1.4	1.28
CACYBP	1	0.99	1.06	1.09	0.93	0.93	0.92	0.86	0.92	0.91	0.9	0.94	0.96	0.95	0.95	0.93	0.92	0.94	0.93	0.93	1.02	1.06	0.99	0.96	0.96	1.04	1.05	1.1	1.11	1.14	1.12	1.08	1.07	1.11	1.09	1.09	1.07	1.11	1.13	1.15	1.17	1.11	1.09	1.11	1.1	1.09	1.11	1.1	1.11
CALD1	1	0.91	0.88	0.75	0.81	0.74	0.74	0.85	0.89	1.03	1.05	1	0.98	0.96	1.03	1.08	1.1	1.11	1.1	1.07	1.06	1.07	1.09	1.11	1.11	1.11	1.14	1.23	1.24	1.22	1.14	1.11	1.08	1.02	1.05	1.05	1.08	1.08	1.07	1.06	1.07	1.08	1.06	1.07	1.07	1.08	1.09	1.12	1.11
CALM1	1	0.972	0.966	0.988	0.996	0.964	0.966	0.988	0.988	0.986	0.982	0.992	1.002	1.006	1.02	1.02	1.016	1.024	1.022	1.002	0.992	0.988	0.988	0.998	1.014	1.018	1.014	1.008	1	0.998	0.994	0.982	0.972	0.98	0.984	0.976	0.982	1.004	0.996	0.994	0.998	1.004	0.994	0.994	0.996	0.996	0.986	0.98	0.972
CALM2	1	1.03	1.05	0.93	0.91	0.9	0.85	0.84	0.83	0.86	0.89	0.89	0.91	0.91	0.88	0.88	0.92	0.94	1.03	0.99	0.97	0.86	0.84	0.85	0.84	0.83	0.88	0.88	0.87	0.84	0.83	0.8	0.85	0.83	0.83	0.86	0.86	0.83	0.82	0.85	0.83	0.83	0.83	0.88	0.87	0.76	0.76	0.78	0.8
CAST	1	0.96	0.92	1.01	0.98	0.97	0.96	0.97	0.98	0.98	0.99	0.99	1	1	0.98	0.99	0.98	1.01	1	1.02	1.03	1.02	1.03	1.03	1.03	1.03	1.04	1.02	1.03	1.03	1.03	1.03	1.04	1.05	1.06	1.06	1.07	1.06	1.07	1.08	1.1	1.09	1.09	1.08	1.08	1.08	1.08	1.08	1.08
CAV1	1	0.92	0.9	0.965	0.895	0.885	0.87	0.865	0.87	0.88	0.89	0.895	0.935	0.935	0.92	0.92	0.925	0.915	0.95	0.94	0.935	0.92	0.915	0.92	0.93	0.93	0.94	0.945	0.955	0.935	0.945	0.955	0.935	0.935	0.925	0.915	0.905	0.915	0.9	0.895	0.935	0.945	0.94	0.97	0.955	0.965	0.99	1.005	1.01
CB045860	1	1.01	1	0.97	1	0.98	0.97	0.95	0.97	0.99	0.99	1	0.98	0.99	1.01	1.02	1.04	1.01	0.99	0.98	0.96	0.94	0.97	0.97	0.97	0.98	0.97	0.97	1.01	1	0.95	0.98	0.97	0.98	0.99	0.96	0.95	0.95	0.96	0.98	0.9	0.95	1	0.99	0.97	0.98	0.99	0.98	0.95
CB046508	1	1.03	0.9	0.79	0.91	0.89	0.77	0.75	0.83	0.85	0.86	0.88	0.88	0.88	0.87	0.78	0.77	0.84	0.91	0.91	0.9	0.92	0.91	0.88	0.86	0.85	0.81	0.79	0.78	0.78	0.8	0.85	0.9	0.9	0.89	0.92	0.98	0.96	0.95	0.97	0.97	0.98	0.99	1	1.01	1	1	0.99	0.97
CB155900	1	1.01	0.82	0.78	0.87	0.91	0.93	0.92	0.91	0.91	0.91	0.92	0.98	0.98	0.99	0.99	0.95	0.99	0.97	0.95	0.94	1	1.1	1.09	1.09	1.11	1.28	1.3	1.29	1.25	1.25	1.23	1.21	1.2	1.09	1.13	1.13	1.28	1.34	1.32	1.29	1.38	1.34	1.31	1.32	1.31	1.29	1.31	1.3
CBWD5	1	1.03	1	1.04	1.08	1.07	1.06	0.97	0.97	1.01	1.02	1.03	1.11	1.01	1	1.03	1.06	1.07	1.13	1.14	1.07	1.06	1.03	1.14	1.11	1.04	1.03	1.21	1.16	1.15	1.14	1.13	1.12	1.13	1.09	1.09	1.12	1.1	1.08	1.05	1.06	1.07	1.08	1.09	1.1	1.11	1.13	1.11	1.1
CCDC12	1	1.01	1	1.02	1.12	1.15	1.07	1.07	1.12	1.14	1.11	1.08	1.03	1.01	1.05	1.07	1.03	1.01	0.95	0.94	0.97	0.97	0.95	0.98	0.97	0.93	0.91	0.93	0.93	0.93	0.92	0.9	0.92	0.91	0.9	0.92	0.89	0.9	0.89	0.88	0.87	0.88	0.84	0.82	0.8	0.84	0.85	0.88	0.88
CCDC23	1	0.96	1.02	1.13	0.97	0.98	0.98	0.98	0.98	0.98	0.98	0.97	0.97	0.97	0.97	0.98	0.99	0.98	0.97	0.96	0.96	0.97	0.94	0.94	0.95	0.93	0.94	0.94	0.94	0.95	0.95	0.98	0.97	0.97	0.97	0.97	1	0.98	1	1	1	1.02	1	1.03	1.04	1.06	1.06	1.08	1.07
CCDC50	1	1.02	1	0.97	1	1.01	1	1	0.99	0.99	1	1.01	1.01	1.01	1.02	1.02	1.03	1.05	1.06	1.09	1.09	1.08	1.08	1.09	1.13	1.13	1.12	1.11	1.11	1.13	1.13	1.13	1.12	1.12	1.13	1.14	1.13	1.14	1.13	1.12	1.12	1.11	1.11	1.1	1.1	1.1	1.11	1.1	1.09
CCDC72	1	1.03	1.03	0.93	0.97	1	1.02	1.07	1.05	1.07	1.09	1.1	1.1	1.11	1.11	1.11	1.11	1.09	1.08	1.09	1.1	1.09	1.08	1.07	1.06	1.06	1.07	1.03	1.03	1.04	1.04	1.04	1.07	1.09	1.05	1.03	1.04	1.02	1.04	1.04	0.98	0.96	0.95	0.96	0.96	0.96	0.98	0.98	0.99
CCDC74A	1	0.9	0.78	0.8	0.87	0.88	0.92	0.93	0.93	0.88	0.94	1	1.03	1.02	1.02	1.04	1.04	1.05	1.08	1.07	1.06	1.06	1.07	1.13	1.1	1.09	1.08	1.09	1.05	0.99	0.98	1.06	1.18	1.18	1.17	1.15	1.13	1.13	1.12	1.11	1.17	1.16	1.14	1.13	1.14	1.14	1.16	1.15	1.16
CD164	1	1.02	0.92	0.92	0.95	1	1	1	1.01	1.03	1.01	0.99	0.95	0.95	0.96	0.99	0.99	0.98	0.95	0.93	0.91	0.92	0.94	0.99	1.07	1.09	1.04	1.08	1.06	1.02	0.99	0.99	1	0.94	0.95	0.95	0.91	0.89	0.87	0.88	0.92	0.88	0.91	0.94	0.93	0.95	0.96	0.97	0.98
CD2AP	1	1.02	0.97	0.96	0.99	1.01	1.01	1	0.99	1	1	1	1	0.99	0.99	0.98	0.97	0.96	0.97	0.97	0.96	0.95	0.95	0.94	0.92	0.9	0.91	0.92	0.94	0.96	0.97	0.98	0.98	0.98	0.98	0.99	0.99	0.98	0.99	1.01	1.01	1.02	1.02	1.02	1.02	1.01	1.01	1.02	1.02
CD44	1	1.0133	1.0233	1.03	1.0567	1.0167	0.9767	0.9367	0.9033	0.8767	0.8667	0.8733	0.91	0.9033	0.88	0.87	0.8533	0.8267	0.81	0.8	0.7567	0.7533	0.7733	0.79	0.81	0.7867	0.7967	0.81	0.8367	0.8267	0.83	0.8167	0.8133	0.8067	0.7967	0.7967	0.7967	0.8067	0.8433	0.83	0.8167	0.82	0.8067	0.8033	0.81	0.81	0.82	0.8167	0.8233
CD63	1	0.97	0.97	1	1.08	1.07	1.07	1.09	1.06	1.03	1.06	1.03	1.05	1.01	0.96	0.98	0.98	1	0.99	0.99	0.98	0.92	0.92	0.93	0.95	0.94	0.93	0.94	0.92	0.93	0.94	0.95	0.99	1	1.01	1.01	0.98	0.97	1.02	1.03	1.01	1	0.98	0.96	0.94	0.93	0.92	0.93	0.95
CD641745	1	1.04	1.02	0.96	1.01	1.03	0.93	0.98	0.97	0.97	1.02	1.03	1.03	1.02	0.99	0.97	0.98	0.99	0.97	0.98	0.98	0.99	1.01	1.01	1	1	1.08	1.06	1.05	1.03	1.02	1.03	1.06	1.06	1.04	1.05	1.03	1.03	1.01	1.01	0.99	0.98	0.98	0.98	0.97	0.96	0.98	1.02	1.01
CD692919	1	1.02	1.13	1.03	0.96	0.96	0.96	0.93	0.94	0.94	0.93	0.91	0.92	0.93	0.94	0.94	0.93	0.93	0.92	0.93	0.96	0.96	0.96	0.96	0.96	0.96	0.94	0.93	0.92	0.91	0.91	0.9	0.9	0.91	0.96	0.97	1.01	0.97	0.98	0.94	0.9	0.91	0.9	0.96	0.97	0.92	0.91	0.91	0.9
CDADC1	1	0.81	0.76	0.79	0.76	0.73	0.71	0.73	0.73	0.74	0.73	0.74	0.74	0.73	0.72	0.72	0.72	0.73	0.73	0.76	0.78	0.8	0.8	0.78	0.83	0.85	0.84	0.84	0.86	0.87	0.83	0.85	0.86	0.85	0.85	0.88	0.86	0.88	0.87	0.86	0.85	0.85	0.91	0.97	0.98	0.98	0.97	0.97	0.97
CDKN3	1	1.03	1.07	1.03	1.05	1.11	1.11	1.12	1.14	1.15	1.18	1.21	1.28	1.29	1.29	1.28	1.34	1.38	1.37	1.37	1.38	1.38	1.34	1.35	1.36	1.36	1.34	1.3	1.26	1.23	1.21	1.21	1.17	1.18	1.19	1.24	1.22	1.21	1.16	1.18	1.16	1.17	1.18	1.12	1.1	1.11	1.07	1.06	1.08
CHCHD2	1	1.01	0.96	0.94	0.96	0.97	0.97	0.98	1	1.02	1.04	1.06	1.06	1.06	1.06	1.06	1.06	1.06	1.05	1.05	1.04	1.03	1.02	1.02	1.02	1.01	1	1	1.01	1.01	0.99	0.99	1.01	1.01	1	1	1.01	1.01	1.01	1.02	1.01	1.01	1.02	1.02	1.02	1.03	1.03	1.02	1.03
CHORDC1	1	1	1.04	0.975	0.84	0.715	0.69	0.72	0.715	0.695	0.68	0.66	0.66	0.665	0.675	0.685	0.675	0.67	0.675	0.695	0.73	0.74	0.77	0.79	0.79	0.815	0.805	0.8	0.8	0.775	0.745	0.735	0.755	0.76	0.79	0.845	0.86	0.785	0.765	0.84	0.84	0.735	0.72	0.685	0.705	0.695	0.66	0.67	0.65
CHURC1	1	1.01	1.05	1.08	0.96	0.97	0.95	0.94	0.93	0.94	0.95	0.95	0.92	0.91	0.9	0.9	0.89	0.89	0.88	0.85	0.83	0.82	0.81	0.8	0.79	0.79	0.79	0.78	0.8	0.95	0.97	0.95	0.94	0.93	0.92	1	0.99	1.03	1.04	1.05	1.03	1.05	1.1	1.1	1.09	1.16	1.14	1.14	1.11
CIP29	1	0.96	0.88	0.81	0.9	1	1.05	1.08	1.13	1.13	1.1	1.07	1.1	1.06	1.06	1.11	1.17	1.16	1.2	1.19	1.17	1.1	1.1	1.1	1.12	1.1	1.09	1.07	1.07	1.04	1.06	1.06	1.08	1.07	1.09	1.09	1.1	1.1	1.1	1.12	1.11	1.16	1.18	1.16	1.19	1.19	1.16	1.12	1.13
CIRBP	1	1	1.09	1.17	1.22	1.11	1.07	1.1	1.1	1.06	1.02	1	0.98	0.96	0.95	0.96	0.93	0.93	0.9	0.94	0.93	0.91	0.91	0.93	0.93	0.92	0.91	0.9	0.9	0.9	0.9	0.89	0.88	0.89	0.89	0.9	0.88	0.88	0.9	0.88	0.82	0.8	0.79	0.8	0.85	0.89	0.83	0.77	0.84
CIRH1A	1	0.99	0.99	1.03	0.97	0.99	0.99	1	1	1.02	1.03	1.03	1.03	1.03	1.03	1.02	1.02	1.02	1.03	1.03	1.02	1.02	1.03	1.04	1.03	1.02	1.02	1.02	0.99	0.98	0.97	0.96	0.95	0.97	0.95	0.95	0.94	0.93	0.91	0.91	0.88	0.86	0.86	0.86	0.86	0.86	0.86	0.87	0.87
CISD1	1	0.97	1.02	1.07	1.02	1.06	1.09	1.15	1.11	1.09	1.12	1.14	1.13	1.14	1.14	1.14	1.11	1.1	1.14	1.16	1.17	1.15	1.12	1.12	1.13	1.14	1.09	1.08	1.09	1.09	1.08	1.18	1.15	1.13	1.16	1.19	1.22	1.2	1.21	1.2	1.19	1.14	1.14	1.17	1.16	1.14	1.18	1.17	1.15
CK126027	1	0.88	0.91	1	0.93	0.9	0.93	0.93	0.93	0.93	0.93	0.94	0.96	0.98	0.99	0.99	0.99	1.01	1.01	1	1.02	1	1.07	1.09	1.11	1.11	1.08	1.06	1.05	1.04	1.04	1.08	1.07	1.07	1.06	1.06	1.04	1.03	1.04	1.04	1.05	1.06	1.06	1.06	1.01	1.02	1.02	1.01	1.02
CKS2	1	1.0133	1.0333	1.0067	1.07	1.0633	1.0933	1.09	1.05	1.08	1.0767	1.0767	1.1	1.0967	1.04	1.1133	1.1533	1.1267	1.1	1.0633	1.0233	0.9333	0.8833	0.8567	0.8367	0.8233	0.7933	0.78	0.7667	0.79	0.76	0.7333	0.7	0.6967	0.6967	0.6867	0.66	0.6367	0.6333	0.6233	0.6267	0.63	0.63	0.6267	0.63	0.6467	0.6633	0.6767	0.68
CLCN3	1	0.97	1.05	1.14	0.95	0.9	0.98	0.98	0.95	0.94	0.88	0.92	0.92	0.93	0.93	0.94	0.96	1	0.97	0.95	0.94	0.94	0.95	0.96	0.88	0.88	0.9	0.94	0.96	0.95	0.96	0.96	0.96	0.98	0.96	1.03	1.02	1	0.98	0.98	1	1.02	1.01	1.07	1.08	1.08	1.03	1.01	1
CLIC1	1	0.99	1.08	1.12	1.07	1	1.02	1.08	1.19	1.33	1.25	1.23	1.32	1.25	1.27	1.26	1.3	1.33	1.33	1.19	1.15	1.16	1.19	1.19	1.17	1.15	1.11	1.09	1.08	1.05	1.03	1.03	1.08	1.08	1.08	1.08	1.1	1.08	1.06	1.14	1.18	1.15	1.17	1.17	1.11	1.08	1.07	0.96	0.97
CLIC4	1	1	0.88	0.89	0.97	1.01	1.03	1.01	0.97	1.02	1.04	1.04	1.03	0.95	0.94	0.94	0.94	0.95	1.02	1.05	1.03	1.03	1	0.97	0.92	0.93	0.97	1.07	1.05	1.09	1.12	1.12	1.14	1.15	1.14	1.15	1.11	1.09	1.08	1.15	1.15	1.19	1.26	1.25	1.21	1.17	1.15	1.12	1.17
CLINT1	1	1.01	0.77	0.96	1.15	1.03	1.06	1.04	1.16	1.16	1.06	1.05	1.08	0.88	0.84	0.88	0.86	0.71	0.72	0.79	0.75	0.75	0.72	0.67	0.78	0.91	0.96	0.91	1.07	1.07	1.01	0.97	1.01	1.08	1.16	1.05	0.94	1.03	1.11	1.02	0.9	0.94	0.93	1.03	1.14	1.22	1.18	1.11	1.1
CLPTM1	1	0.98	1.03	1.07	0.95	0.98	0.96	0.96	0.95	0.99	1.02	1.08	1.1	1.14	1.22	1.23	1.22	1.16	1.18	1.21	1.3	1.26	1.23	1.17	1.15	1.18	1.21	1.19	1.17	1.16	1.15	1.13	1.11	1.11	1.15	1.16	1.15	1.13	1.12	1.16	1.17	1.15	1.16	1.13	1.14	1.12	1.1	1.09	1.11
CN267986	1	0.98	1	0.92	0.95	1	1.05	1.09	1.12	1.13	1.12	1.15	1.18	1.17	1.2	1.24	1.24	1.2	1.18	1.18	1.2	1.21	1.21	1.24	1.26	1.27	1.33	1.33	1.26	1.25	1.25	1.22	1.19	1.25	1.32	1.25	1.25	1.24	1.24	1.22	1.17	1.14	1.12	1.15	1.18	1.25	1.25	1.25	1.23
CN398253	1	1.02	1.07	0.96	0.99	1.04	1.06	0.95	1	1.09	1.13	1.17	1.17	1.15	1.23	1.24	1.16	1.17	1.2	1.2	1.2	1.17	1.16	1.16	1.16	1.17	1.15	1.11	1.09	1.1	1.12	1.16	1.16	1.16	1.12	1.09	1.1	1.12	1.11	1.1	1.09	1.17	1.17	1.15	1.11	1.11	1.02	1.02	1.02
CNN3	1	1.03	1.02	0.92	0.96	0.99	1	1	1	1	1	1.01	1.01	1.01	1.01	1.01	1.01	1.01	0.99	1.01	1	1.01	1.01	1.01	1.01	1.01	1	1	0.99	1	0.99	0.98	0.97	0.98	0.99	0.98	0.97	0.97	0.97	0.98	0.95	0.95	0.97	0.99	0.99	0.99	0.99	0.97	0.98
COPS6	1	0.9933	1.07	1.1767	1.17	1.0667	1.0767	1.1167	1.0933	1.08	1.0733	1.0567	1.0467	1.01	0.97	0.9467	0.94	0.9167	0.9233	0.9467	0.9567	0.96	0.9367	0.91	0.8867	0.9433	0.9633	0.97	1.0233	1.0567	1.0733	1.1167	0.99	0.9767	0.9867	0.9667	0.9533	0.9767	0.9567	0.9467	0.94	0.9367	0.9233	0.9333	0.9433	0.9233	0.92	0.9133	0.9167
COTL1	1	1.045	0.99	1.015	1.02	1.1	1.03	1.005	0.965	0.96	0.95	0.96	0.965	0.95	0.955	0.95	0.94	0.965	0.965	0.96	0.935	0.93	0.915	0.945	0.92	0.915	0.91	0.91	0.91	0.915	0.935	0.97	0.96	0.98	0.99	1.04	1.035	1.025	1.035	1.06	1.055	1.035	1.025	1.035	1.06	1.06	0.925	0.91	0.915
COX17	1	1.01	0.98	0.99	0.95	1	1.06	1.05	1.01	0.99	0.98	0.99	1.01	1	1	1	0.98	0.98	1.08	1.13	1.14	1.09	1.13	1.12	1.12	1.13	1.13	1.13	1.13	1.12	1.08	1.06	1.09	1.08	1.07	1.08	1.07	1.1	1.09	1.16	1.18	1.18	1.18	1.16	1.16	1.17	1.15	1.13	1.12
COX7C	1	1	1.04	0.97	0.87	0.88	0.86	0.83	0.8	0.78	0.78	0.78	0.82	0.86	0.9	0.97	0.91	0.87	0.77	0.71	0.69	0.65	0.65	0.67	0.71	0.71	0.73	0.72	0.72	0.71	0.72	0.77	0.79	0.79	0.79	0.79	0.77	0.76	0.75	0.74	0.7	0.68	0.68	0.69	0.71	0.73	0.74	0.71	0.64
CR593740	1	0.87	0.82	0.87	0.8	0.78	0.8	0.8	0.81	0.81	0.85	0.83	0.82	0.81	0.8	0.81	0.82	0.83	0.83	0.84	0.86	0.85	0.82	0.81	0.84	0.82	0.82	0.83	0.84	0.86	0.86	0.9	0.89	0.89	0.89	0.88	0.94	0.92	0.92	0.91	0.93	0.94	0.92	0.91	0.95	0.96	0.94	0.92	0.92
CR623475	1	1.02	1.05	1.09	1.02	1.03	1.03	1.04	1.07	1.09	1.11	1.11	1.08	1.08	1.09	1.1	1.09	1.09	1.08	1.09	1.09	1.1	1.09	1.07	1.06	1.08	1.08	1.08	1.09	1.09	1.1	1.08	1.07	1.09	1.07	1.03	1.04	1.05	1.04	1.04	1.02	1.04	1.05	1.04	1.02	1.03	1.02	1.03	1.05
CR627148	1	1	0.9	0.87	0.92	0.94	0.94	0.93	0.94	0.92	0.91	0.91	0.91	0.92	0.92	0.92	0.95	0.96	0.98	0.97	0.95	0.98	0.99	0.99	1	1	0.99	0.98	0.96	0.95	1	0.99	1.02	0.99	0.97	0.97	0.97	0.94	0.95	0.95	0.95	0.96	0.96	0.99	0.98	1.01	1	0.97	0.94
CR737784	1	1.02	1	1	1.08	1.15	1.15	1.17	1.17	1.09	1.1	1.14	1.16	1.17	1.19	1.37	1.45	1.42	1.33	1.24	1.2	1.23	1.24	1.24	1.18	1.12	1.09	1.13	1.17	1.07	1.05	1.06	1.09	1.13	1.14	1.18	1.19	1.12	1.08	1.11	1.12	1.14	1.17	1.15	1.12	1.08	1.05	1.05	1.11
CRKL	1	1	0.965	1.055	1.08	1.14	1.16	1.17	1.225	1.23	1.235	1.31	1.3	1.31	1.315	1.275	1.255	1.22	1.2	1.21	1.2	1.17	1.15	1.11	1.095	1.08	1.065	1.07	1.09	1.1	1.085	1.095	1.095	1.165	1.2	1.16	1.145	1.17	1.16	1.2	1.21	1.255	1.255	1.25	1.21	1.215	1.205	1.2	1.2
CSNK1A1	1	0.94	1.04	0.93	0.85	0.77	0.78	0.79	0.81	0.83	0.93	0.84	0.84	0.81	0.81	0.79	0.75	0.74	0.8	0.83	0.85	0.85	0.85	0.85	0.85	0.86	0.86	0.86	0.81	0.8	0.79	0.79	0.78	0.79	0.79	0.79	0.79	0.79	0.79	0.82	0.81	0.79	0.78	0.79	0.8	0.8	0.81	0.85	0.84
CSTF3	1	1.02	1.01	1.02	1	1.05	1.1	1.13	1.12	1.11	1.05	1.04	1.09	1.05	1.07	1.07	1.08	1.04	1.02	0.99	0.98	0.98	0.97	0.97	1.01	1.01	1.02	1.01	1	1.02	1.04	1.05	1.05	1.03	1	1	0.99	0.98	1.06	1.05	1.05	1.04	1.03	1.02	1.03	1.04	1.04	1.04	1.03
DA336829	1	0.97	0.95	0.98	1.06	1.06	1.05	1.07	1.05	1.06	1.06	1.05	1.04	1.05	1.07	1.06	1.09	1.08	1.09	1.07	1.06	1.05	1.07	1.13	1.13	1.15	1.16	1.13	1.13	1.12	1.13	1.12	1.21	1.24	1.2	1.19	1.17	1.15	1.13	1.08	1.05	1.07	1.07	1.05	1.03	1.03	1.03	1.05	1.05
DA697821	1	1	1.09	1.16	1.1	1.04	1.02	1.03	1.05	1.07	1.1	1.11	1.12	1.11	1.1	1.09	1.1	1.08	1.08	1.09	1.09	1.08	1.07	1.07	1.06	1.07	1.08	1.07	1.06	1.05	1.03	1.02	1	0.99	0.98	0.98	0.98	0.98	1	0.99	0.97	0.97	0.98	0.98	0.97	0.94	0.94	0.94	0.94
DAD1	1	1.01	0.98	0.97	0.95	0.99	1	1.06	1.09	1.15	1.16	1.17	1.17	1.16	1.18	1.19	1.18	1.16	1.17	1.17	1.17	1.17	1.21	1.2	1.19	1.17	1.15	1.16	1.18	1.16	1.16	1.18	1.18	1.17	1.15	1.14	1.14	1.13	1.12	1.14	1.14	1.14	1.17	1.18	1.17	1.16	1.16	1.14	1.12
DAP	1	1.06	0.88	0.8	0.91	0.89	0.87	0.89	0.9	0.89	0.91	0.92	0.92	0.9	0.89	0.89	0.88	0.9	0.94	0.93	0.93	0.9	0.91	0.9	0.88	0.85	0.83	0.82	0.83	0.82	0.81	0.81	0.8	0.8	0.8	0.81	0.81	0.82	0.83	0.8	0.77	0.79	0.82	0.82	0.83	0.83	0.84	0.85	0.87
DAZAP2	1	1.01	1.08	1.1	1	1.01	1.01	1	0.98	1.01	1.01	1	1	1.01	1	1.03	1.03	1.03	1.02	1.02	0.99	1.01	1.02	1.05	1.04	1.04	1.02	1.01	1.02	1.01	1.01	1	1	1	1	1.01	1.03	1.05	1.04	1.03	1.03	1.06	1.06	1.04	1.03	1.04	1.03	1.04	1.05
DB049861	1	1.02	1.04	1.05	1.13	1.11	1.15	1.11	1.05	1.02	1.02	1.01	0.97	0.97	0.96	0.97	1.01	1.01	1.01	1.04	1.06	1.05	1.07	1.08	1.02	1	0.96	0.95	0.99	1	1	1.01	1.05	1.06	1.08	1.09	1.11	1.11	1.1	1.09	1.09	1.08	1.08	1.06	1.06	1.07	1.06	1.06	1.04
DB054822	1	1.02	1.18	1.97	2.04	2.18	2.21	1.76	1.41	1.33	1.46	1.31	1.27	1.26	1.23	1.2	1.2	1.2	1.19	1.05	1.04	1.05	1.14	1.14	1.14	1.14	1.14	1.13	1.13	1.12	1.11	1.2	1.19	1.19	1.18	1.21	1.29	1.63	1.74	1.52	1.39	1.18	1.17	1.18	1.15	1.15	1.31	1.32	1.31
DB331110	1	0.8	0.76	0.87	0.84	0.76	0.78	0.78	0.95	0.94	0.93	0.91	0.9	0.98	0.97	0.93	0.9	0.91	0.91	0.93	0.92	0.92	0.99	0.99	0.98	0.96	0.95	0.97	0.96	0.95	0.97	0.96	0.96	0.97	0.96	0.93	0.98	1.03	1.03	1.01	1	1	1.11	1.14	1.13	1.13	1.13	1.12	1.11
DB344099	1	0.88	0.81	0.88	0.77	0.77	0.78	0.79	0.82	0.84	0.8	0.79	0.76	0.78	0.85	0.83	0.86	0.88	0.92	0.94	0.97	0.98	0.93	0.93	0.99	1.02	1.09	1.08	1.06	1.11	1.09	1.08	1.07	1.05	1.11	1.11	1.14	1.14	1.12	1.11	1.14	1.14	1.12	1.17	1.19	1.16	1.15	1.12	1.12
DB478885	1	0.95	0.97	1.05	1	1.06	1.08	1.09	1.1	1.09	1.1	1.14	1.13	1.12	1.11	1.15	1.19	1.22	1.22	1.24	1.26	1.23	1.23	1.21	1.18	1.28	1.28	1.29	1.32	1.3	1.24	1.25	1.33	1.36	1.35	1.36	1.33	1.32	1.26	1.24	1.23	1.38	1.35	1.31	1.28	1.26	1.22	1.24	1.23
DB514539	1	1.03	0.99	1.01	1.1	1.16	1.12	1.04	1.02	1.01	1.01	0.96	0.93	0.93	0.93	0.93	0.93	0.93	0.94	0.95	0.95	0.96	0.95	0.93	0.91	0.91	0.9	0.9	0.9	0.89	0.98	1.01	1.02	1.01	0.99	0.98	0.98	1	1.02	1.06	1.03	0.98	0.97	1.04	1.07	1.06	1.08	1.06	1.04
DB522524	1	1.02	0.97	0.87	0.92	0.92	0.92	0.93	0.93	0.95	0.97	1.01	1.01	1.02	1.03	1.01	0.96	0.97	0.99	0.98	0.99	0.98	0.96	0.96	1.01	1.02	1.03	1.02	1.04	1.04	1.03	1	1	0.97	0.98	1.01	1.02	1.03	1.03	1.03	1	0.98	0.97	0.96	0.96	0.98	1.01	1.02	1.01
DC347972	1	1	1.015	1.07	1.065	1.085	1.075	1.08	1.1	1.095	1.13	1.155	1.14	1.145	1.14	1.125	1.115	1.115	1.1	1.09	1.085	1.1	1.11	1.105	1.11	1.085	1.065	1.055	1.07	1.07	1.07	1.065	1.06	1.075	1.09	1.095	1.07	1.065	1.065	1.055	1.09	1.095	1.07	1.075	1.08	1.1	1.095	1.095	1.09
DCBLD2	1	1	1	1.05	1.05	1.08	1.09	1.11	1.11	1.12	1.13	1.09	1.06	1.06	1.06	1.07	1.08	1.06	1.11	1.14	1.16	1.19	1.26	1.25	1.26	1.18	1.14	1.15	1.15	1.16	1.15	1.12	1.15	1.16	1.23	1.23	1.22	1.25	1.3	1.29	1.28	1.27	1.28	1.29	1.3	1.28	1.3	1.28	1.29
DDEF2	1	1.02	0.99	1.02	1.07	1.1	1.11	1.09	1.1	1.13	1.12	1.11	1.13	1.13	1.09	1.1	1.09	1.11	1.11	1.15	1.15	1.17	1.21	1.21	1.19	1.19	1.16	1.15	1.17	1.17	1.18	1.18	1.2	1.19	1.17	1.17	1.15	1.14	1.11	1.1	1.12	1.12	1.09	1.07	1.06	1.06	1.07	1.06	1.06
DDT	1	1.01	1.07	1.09	1.03	1.02	1.02	1.03	1.04	1.05	1.02	1.04	1.04	1.05	1.05	1.05	1.04	1.07	1.06	1.06	1.06	1.04	1.04	1.03	1.01	1.01	1.01	1.01	1	1.01	1.02	1.02	1.03	1.04	1.05	1.05	1.04	1.06	1.06	1.06	1.06	1.07	1.07	1.07	1.1	1.11	1.11	1.11	1.1
DDX10	1	1.01	1.03	1	1	0.98	0.99	1	1.01	1	1	1.01	1.02	1.03	1.02	1.03	1.03	1.01	0.99	0.99	0.99	1.01	0.98	0.98	0.98	0.98	0.97	0.96	0.96	0.96	0.97	0.96	0.96	0.98	0.98	0.98	0.97	0.95	0.92	0.95	0.96	0.96	1.02	1.03	1.05	1.05	1.03	1.02	1.01
DDX18	1	0.968	1.07	1.144	1.16	1.166	1.184	1.19	1.172	1.172	1.184	1.138	1.1	1.094	1.098	1.116	1.128	1.136	1.122	1.112	1.124	1.12	1.1	1.076	1.056	1.064	1.044	1.064	1.054	1.036	1.028	1.022	1.022	1.012	0.994	0.998	1.002	0.992	1.004	0.998	1.032	1.026	1.01	1.008	1.024	1.048	1.054	1.06	1.056
DDX46	1	1.01	1.05	1.025	1	1.01	1.02	1.03	1.035	1.055	1.08	1.095	1.095	1.09	1.07	1.07	1.09	1.095	1.095	1.1	1.105	1.105	1.08	1.075	1.075	1.09	1.115	1.11	1.1	1.085	1.075	1.065	1.055	1.065	1.065	1.065	1.065	1.065	1.075	1.085	1.08	1.065	1.055	1.05	1.04	1.045	1.06	1.065	1.065
DDX5	1	1.005	1.0563	1.0362	1.04	1.045	1.0362	1.0313	1.0263	1.0237	1.0162	1.0188	1.0013	0.9912	0.99	0.99	0.9912	1.0063	1.0063	0.995	0.9963	0.9875	0.99	0.9837	0.98	0.98	0.9763	0.9688	0.9525	0.9312	0.9337	0.93	0.9237	0.9162	0.9125	0.9025	0.895	0.9013	0.9	0.9025	0.905	0.8975	0.885	0.8862	0.8812	0.8813	0.8825	0.8838	0.8875
DEK	1	1.015	1.065	1.065	1.105	1.115	1.115	1.105	1.07	1.015	1.02	1.01	0.975	0.94	0.915	0.905	0.92	0.91	0.925	0.93	0.965	0.96	0.94	0.935	0.925	0.95	0.975	0.99	0.995	1.09	1.095	1.14	1.095	1.09	1.015	1.005	1.01	1	0.995	0.975	0.98	0.96	0.985	1	1.005	0.995	1	1.01	0.995
DHX15	1	1.0033	1.05	1.0467	1.02	1.06	1.0767	1.0767	1.0933	1.11	1.19	1.2067	1.2033	1.1933	1.17	1.1667	1.06	1.03	1.03	1.02	1.04	1.07	1.0967	1.08	1.04	0.9867	0.9933	0.9833	0.98	0.98	0.9833	1.0133	1.04	1.04	1.0167	1.02	1.02	1.02	1.0067	1.0067	0.9933	0.9967	1.0133	1.02	1.0367	1.0167	1.0067	1.0033	1.03
DHX16	1	0.98	0.96	1.01	1	1	1	1.01	1.01	0.99	1	0.99	1	1.03	1.03	1.03	1.05	1.06	1.05	1.06	1.06	1.06	1.06	1.07	1.06	1.05	1.07	1.08	1.08	1.09	1.14	1.14	1.16	1.16	1.09	1.07	1.08	1.11	1.11	1.11	1.11	1.11	1.09	1.08	1.08	1.07	1.07	1.07	1.06
DKKL1	1	0.98	1.11	1.18	1.21	1.25	1.19	1.04	1.02	1.02	0.98	0.95	0.94	0.94	0.92	0.91	0.9	0.89	0.87	0.85	0.87	0.85	0.84	0.84	0.83	0.8	0.8	0.79	0.79	0.88	0.89	0.87	0.94	1.01	1.01	1	0.99	0.98	1.07	1.07	1.06	1.04	1.03	1.03	1.02	0.99	1.01	1.06	1.06
DMTF1	1	1.04	0.95	0.92	0.99	1.01	1.01	1.01	1.01	0.97	0.91	0.89	0.86	0.8	0.77	0.75	0.74	0.76	0.76	0.75	0.75	0.75	0.74	0.75	0.75	0.74	0.74	0.76	0.77	0.75	0.76	0.76	0.77	0.77	0.76	0.77	0.76	0.75	0.76	0.76	0.76	0.78	0.79	0.8	0.8	0.8	0.79	0.81	0.81
DNAJA1	1	1.01	1.12	1.12	1.01	0.99	0.98	0.97	0.95	0.96	0.97	0.99	0.98	0.98	0.98	0.99	0.99	0.99	1	0.97	0.95	0.95	0.95	1.02	1.02	1.01	1.01	1.02	1.04	1.03	1.03	0.99	0.98	1.03	0.97	0.97	0.98	0.98	0.95	0.98	0.99	0.96	0.94	0.95	0.96	0.96	0.95	0.95	0.95
DNAjC7	1	0.96	0.8	0.84	0.93	0.95	0.96	0.99	1.01	1.06	1.06	1.06	1.06	1.1	1.07	1.04	1.02	1.05	1.09	1.09	1.15	1.2	1.19	1.19	1.23	1.21	1.2	1.22	1.25	1.21	1.17	1.11	1.1	1.13	1.11	1.11	1.11	1.11	1.08	1.08	1.08	1.09	1.06	1.06	1.06	1.08	1.1	1.09	1.11
DNMT1	1	1.0175	1.08	1.15	1.0325	1.0425	1.035	1.03	1.0375	1.04	0.9975	0.995	1.0025	0.9975	0.995	0.975	0.97	0.955	0.9475	0.95	0.9475	0.94	0.96	0.95	0.9475	0.9475	0.9375	0.9325	0.9425	0.935	0.9375	0.925	0.9425	0.9225	0.91	0.905	0.9025	0.91	0.915	0.92	0.9225	0.935	0.98	0.98	0.965	0.9575	0.9575	0.955	0.9675
DYNC1H1	1	0.99	0.9867	0.9967	0.9433	0.96	0.9867	1.0167	1.01	1.01	1.0267	1.0633	1.0567	1.06	1.05	1.04	1.0333	1.0233	1.0067	1	0.9967	1	1	0.98	0.9833	0.9733	0.97	0.96	0.9833	0.9833	0.9867	0.9867	0.9767	0.97	0.9567	0.93	0.9167	0.89	0.9267	0.9767	0.99	1.0067	0.9933	1	0.9767	0.97	0.96	0.9533	0.95
EED	1	0.99	1.14	1.22	0.99	0.97	0.98	0.98	0.99	0.99	0.99	0.99	0.98	0.99	0.99	0.99	0.99	1	0.99	0.95	0.97	0.98	1.01	1.02	1.02	1.02	1	0.99	0.99	1	1.03	1.05	1.04	1.05	1.05	1.04	1.05	1.07	1.09	1.1	1.12	1.1	1.09	1.1	1.12	1.13	1.13	1.13	1.13
EEF1A1	1	1.045	0.865	0.775	0.865	0.83	0.775	0.74	0.73	0.74	0.725	0.73	0.72	0.705	0.71	0.675	0.66	0.67	0.64	0.61	0.59	0.575	0.63	0.675	0.795	0.82	0.82	0.885	0.895	0.885	0.885	0.95	1.08	1.065	1.125	1.12	1.11	1.105	1.15	1.155	1.125	1.12	1.13	1.11	1.12	1.115	1.11	1.105	1.115
EEF1E1	1	1.02	1.04	1.03	0.995	1.045	1.045	0.975	0.95	0.93	0.92	0.9	0.855	0.855	0.83	0.85	0.85	0.86	0.875	0.865	0.85	0.835	0.86	0.82	0.805	0.835	0.825	0.81	0.815	0.825	0.82	0.825	0.825	0.815	0.83	0.86	0.86	0.845	0.87	0.89	0.915	0.94	0.975	0.97	0.96	0.95	0.955	0.955	0.975
EEF2	1	1.02	0.96	0.87	0.95	0.985	0.975	0.92	0.885	0.855	0.815	0.775	0.795	0.8	0.79	0.78	0.79	0.81	0.805	0.785	0.77	0.755	0.735	0.725	0.745	0.755	0.745	0.715	0.685	0.665	0.64	0.61	0.63	0.62	0.625	0.625	0.66	0.64	0.665	0.65	0.64	0.63	0.61	0.63	0.6	0.615	0.625	0.635	0.61
EIF1AX	1	1.01	1.02	1.06	1.07	1.04	1.01	1	1	1.02	1.05	1.09	1.07	1.06	1.04	1.03	1.05	1.04	1.03	1	1.01	0.99	0.97	0.97	0.96	0.98	0.97	0.97	0.98	0.97	0.97	0.97	0.97	0.99	0.97	0.98	0.96	0.97	0.97	0.96	0.94	0.96	0.96	0.95	0.94	0.94	0.93	0.93	0.94
EIF2S2	1	1	1.065	1.09	1.01	0.985	0.955	0.97	0.97	0.955	0.98	1.015	1	0.95	0.94	0.93	0.935	0.94	0.92	0.945	0.94	0.94	0.92	0.93	0.945	0.985	0.97	0.965	0.92	0.875	0.88	0.905	0.965	0.99	1.015	0.98	0.985	0.99	0.99	0.975	0.99	1	0.95	0.945	0.9	0.885	0.91	0.915	0.905
EIF2S3	1	1.0033	0.9	0.91	0.9067	0.91	0.9067	0.89	0.9233	0.96	0.98	0.9867	1.0233	1.08	1.07	1.09	1.03	1.04	1.0433	1.0367	1.0067	0.99	1.0267	1.0533	1.03	1.02	1.0133	0.9867	0.9967	1.0267	1.0233	1.0233	1.0333	1.03	1.0067	0.99	0.9933	1.0033	0.9833	0.9733	1.0033	1.0133	1.01	1.0267	1.0167	1.0067	0.9633	0.91	0.9333
EIF3K	1	0.985	0.99	0.9917	0.965	0.965	0.975	0.99	1.0117	1.0217	1.0233	1.0217	1.0283	1.0533	1.0617	1.0767	1.0783	1.0767	1.065	1.06	1.0783	1.0967	1.085	1.0717	1.0683	1.085	1.095	1.0883	1.0583	1.035	1.0283	1.0417	1.0367	1.035	1.0383	1.0467	1.075	1.07	1.055	1.045	1.0317	1.01	0.995	0.9883	1.0467	1.0267	1.0217	0.9933	0.99
EIF3S10	1	1.025	0.97	0.95	1.04	0.99	1.015	1.03	1.07	1.065	1.02	0.975	0.965	0.985	1	1.015	0.995	0.975	0.95	0.94	0.925	0.9	0.905	0.93	0.96	1.02	1.01	0.985	0.98	0.98	1.055	1.07	1.045	1.035	1.03	1.035	1.045	1.225	1.255	1.25	1.245	1.025	1.045	1.13	1.14	1.12	1.115	1.08	1.045
EIF4A1	1	1.0267	0.9567	0.9133	0.9167	0.96	0.9933	1	1.0067	1.0367	1.0633	1.0767	1.04	1.0133	1.0267	1.0433	1.0033	0.98	0.96	0.9567	0.9733	1.01	1.0033	0.92	0.93	0.9333	0.9567	0.9667	0.98	0.97	0.9267	0.9467	0.9367	0.95	0.9533	0.9467	0.9367	0.9267	0.9333	0.9167	0.93	0.9467	0.9267	0.9233	0.9167	0.9333	0.9067	0.9	0.9
EIF4E	1	1.04	0.97	0.98	0.97	0.96	0.91	0.88	0.87	0.88	0.87	0.88	0.88	0.89	0.91	0.89	0.87	0.9	0.87	0.86	0.85	0.82	0.83	0.83	0.84	0.85	0.85	0.84	0.89	0.88	0.95	0.97	0.96	0.96	1.03	1.02	1	0.99	0.98	0.94	0.92	0.9	0.96	0.92	0.99	1.01	0.96	0.97	0.97
EIF4E2	1	0.9	1.15	1.52	1.29	1.4	1.5	1.59	1.6	1.45	1.32	1.35	1.33	1.52	1.52	1.41	1.41	1.36	1.39	1.45	1.39	1.41	1.5	1.48	1.45	1.41	1.4	1.38	1.33	1.29	1.26	1.27	1.32	1.33	1.29	1.27	1.3	1.35	1.35	1.32	1.23	1.23	1.22	1.15	1.09	1.1	1.1	1.1	1.05
EIF4EBP1	1	1.02	0.97	0.915	0.975	1.07	1.06	1.065	1.1	1.155	1.155	1.08	1.055	1.01	0.995	0.995	0.975	0.995	0.995	0.97	0.95	0.95	0.96	0.995	0.98	0.975	0.98	0.96	0.935	0.885	0.865	0.86	0.875	0.87	0.915	0.91	0.87	0.87	0.88	0.875	0.865	0.885	0.91	0.94	0.93	0.895	0.945	0.98	0.995
EIF4G3	1	1	1.105	1.03	0.91	0.925	0.885	0.905	0.915	0.945	0.895	0.87	0.875	0.87	0.89	0.9	0.895	0.9	0.87	0.89	0.885	0.905	0.865	0.86	0.89	0.895	0.92	0.94	0.88	0.915	0.875	0.87	0.865	0.88	0.895	0.86	0.855	0.84	0.785	0.76	0.81	0.825	0.835	0.845	0.825	0.81	0.815	0.81	0.92
EIF4H	1	0.9967	0.8967	0.9	0.94	0.9433	0.9333	0.9067	0.9067	0.9	0.9	0.9033	0.91	0.9133	0.93	0.9333	0.9267	0.9133	0.9667	0.9733	0.9767	1.05	1.0433	1.04	1.0033	1.0033	1.0833	1.0967	1.07	1.0767	1.0933	1.1067	1.1067	1.1133	1.1233	1.1233	1.1067	1.0967	1.0867	1.0967	1.08	1.0733	1.0667	1.0667	1.0633	1.0533	1.0433	1.0533	1.05
EIF5B	1	1.01	0.9	0.896	0.946	0.892	0.886	0.854	0.85	0.846	0.846	0.852	0.842	0.832	0.834	0.828	0.852	0.838	0.838	0.862	0.886	0.886	0.888	0.882	0.898	0.902	0.922	0.92	0.93	0.938	0.932	0.918	0.946	0.916	0.892	0.89	0.92	0.952	0.958	0.948	0.964	0.92	0.938	0.922	0.916	0.924	0.922	0.95	0.946
ENO1	1	1.01	0.9967	1.0317	1.0383	1.0467	1.0517	1.0517	1.055	1.0517	1.0483	1.0417	1.0383	1.035	1.04	1.0433	1.0483	1.0467	1.055	1.045	1.05	1.055	1.04	1.045	1.0383	1.0283	1.02	1.0183	1.0233	1.0233	1.015	1.0083	0.9933	0.9783	0.9617	0.9583	0.96	0.9533	0.95	0.9433	0.94	0.9433	0.9317	0.9333	0.935	0.93	0.935	0.925	0.9283
FABP5	1	1.03	0.945	0.905	0.925	0.94	0.955	0.95	0.95	0.93	0.93	0.955	0.98	1.02	1.025	1.01	1.01	0.995	0.99	0.995	1.01	1.005	0.995	1	1	0.995	0.99	0.975	0.975	0.99	0.98	0.99	0.995	0.995	0.995	1.005	1	0.995	0.985	0.97	0.975	0.955	0.96	0.95	0.95	0.965	0.965	0.965	0.985
FAM128A	1	1.03	1.01	0.98	1.14	1.2	1.21	1.15	1.18	1.23	1.17	1.15	1.15	1.16	1.18	1.19	1.18	1.18	1.14	1.1	1.09	1.09	1.08	0.99	0.99	0.97	0.96	0.96	0.98	1	0.96	0.94	0.98	0.99	1	1.05	1.05	1.02	1.01	1.08	1.1	1.08	1.08	1.06	1.07	1.08	1.08	1.06	1.01
FAM44A	1	1.04	1.01	1.07	1.18	1.21	1.19	1.18	1.17	1.16	1.17	1.18	1.23	1.24	1.27	1.28	1.34	1.37	1.37	1.52	1.59	1.57	1.54	1.49	1.51	1.47	1.37	1.35	1.31	1.28	1.31	1.27	1.26	1.25	1.18	1.15	1.11	1.1	1.09	1.09	1.14	1.15	1.12	1.11	1.04	1.03	1.03	1	1.02
FAM86A	1	0.98	0.94	1	1.08	1.05	0.94	0.87	0.88	0.92	0.94	0.94	0.95	1	1.02	0.99	0.94	0.88	0.93	0.95	1.03	0.98	0.98	1.02	1.01	1.01	1.02	1.02	1.02	0.98	0.97	0.98	0.97	0.91	0.94	0.94	0.99	0.93	0.96	0.94	0.94	0.96	0.97	0.98	1.02	1.02	1.01	1	0.98
FAU	1	1.014	1.012	1.022	0.976	0.966	0.964	0.956	0.956	0.954	0.956	0.952	0.95	0.952	0.96	0.962	0.956	0.96	0.956	0.98	0.98	0.978	0.97	0.96	0.94	0.938	0.938	0.98	0.97	0.964	0.996	0.988	0.964	0.952	0.932	0.956	0.958	0.962	0.958	0.948	0.958	0.976	0.982	0.98	0.982	0.988	1.012	1.014	1.02
FER1L3	1	1.01	1.04	1.06	1.04	1.02	1	1	1.01	1.03	1.06	1.08	1.07	1.1	1.09	1.11	1.1	1.09	1.06	1.01	1.01	1.01	1.02	1	1.03	1.1	1.11	1.1	1.11	1.1	1.1	1.09	1.1	1.13	1.14	1.14	1.11	1.12	1.11	1.09	1.12	1.14	1.14	1.13	1.12	1.14	1.14	1.14	1.13
FLJ10986	1	1.03	0.82	0.65	0.76	0.91	0.94	1.01	1.02	1.03	1.05	0.97	0.86	0.89	0.82	0.85	0.84	0.89	0.92	0.85	0.82	0.77	0.73	0.83	0.79	0.6	0.63	0.78	0.83	0.77	0.55	0.8	0.9	0.9	0.96	0.95	0.99	0.98	1.01	1.01	1	1.04	0.97	0.9	0.95	1.06	1.05	1.05	1.02
FLJ20105	1	0.99	0.93	0.92	0.89	0.94	0.96	0.95	0.94	0.96	0.98	1	1.03	1.05	1.05	1.05	1.05	1.02	1.01	1.02	1.02	1.05	1.06	1.02	1.05	1.13	1.13	1.1	1.07	1.07	1.08	1.09	1.07	1.07	1.03	1.03	1.04	1.08	1.05	1.04	1.01	1.03	1.04	1.04	1.03	1.03	1.03	1.03	1
FLJ20674	1	0.99	1.12	1.2	0.96	0.97	0.97	0.96	0.99	0.99	0.98	0.98	0.97	0.96	0.96	0.95	0.93	0.93	0.89	0.89	0.94	0.95	0.96	0.96	0.95	0.93	0.93	0.93	0.93	0.91	0.91	0.9	0.91	0.89	0.84	0.83	0.82	0.88	0.88	0.91	1	0.99	1	0.99	1.03	1.07	1.08	1.04	1.04
FLJ21908	1	1.03	0.94	0.87	0.95	1.01	1.03	1	1	0.99	0.99	0.98	1.01	1.01	1.02	1.02	0.98	0.98	0.97	0.98	1	1	0.98	1	1.03	1.02	1.06	1.03	1.08	1.06	1.06	1.07	1.07	1.08	1.06	1.05	1.05	1.06	1.08	1.1	1.08	1.07	1.06	1.05	1.03	1.01	1	1.01	1.01
FLJ31951	1	0.98	1.02	1.03	0.96	0.99	1.02	1.09	1.08	1.06	1.06	1.08	1.1	1.09	1.11	1.1	1.11	1.12	1.09	1.09	1.09	1.11	1.11	1.13	1.12	1.15	1.1	1.08	1.07	1.08	1.07	1.06	1.06	1.05	1.06	1.07	1.07	1.06	1.06	1.06	1.05	1.04	1.1	1.08	1.11	1.08	1.06	1.07	1.06
FLNB	1	0.94	0.8	0.93	0.77	0.81	0.85	0.99	0.89	0.91	0.96	0.93	0.94	0.94	0.98	0.96	0.96	1.31	1.29	1.34	1.29	1.23	1.2	1.19	1.29	1.29	1.3	1.26	1.26	1.21	1.31	1.33	1.34	1.33	1.27	1.23	1.27	1.27	1.24	1.21	1.18	1.24	1.3	1.27	1.25	1.21	1.19	1.16	1.16
FOSL1	1	0.97	0.86	0.8	0.9	0.91	0.9	0.89	0.87	0.87	0.87	0.87	0.88	0.88	0.88	0.86	0.85	0.84	0.83	0.8	0.79	0.83	0.82	0.82	0.82	0.81	0.8	0.78	0.76	0.74	0.72	0.7	0.69	0.7	0.7	0.7	0.69	0.85	0.87	0.87	0.87	0.95	0.95	0.94	0.92	0.93	0.96	0.95	0.92
FSCN1	1	1.025	1.075	1.06	1.015	1.04	1.035	1	1	0.99	0.975	0.99	1.005	1.025	1.055	1.045	1.035	1.04	1.05	1.04	1.055	1.06	1.065	1.065	1.055	1.075	1.07	1.07	1.06	1.065	1.085	1.12	1.125	1.095	1.075	1.06	1.065	1.075	1.07	1.06	1.065	1.045	1.055	1.04	1.04	1.05	1.055	1.07	1.09
FUBP1	1	1.03	1.01	1.05	1.01	1.01	1.03	1.06	1.08	1.11	1.13	1.13	1.13	1.16	1.16	1.15	1.16	1.17	1.17	1.18	1.08	1.08	1.11	1.12	1.1	1.09	1.06	1.06	1.06	1.05	1.06	1.04	0.97	0.97	1.03	1.02	1	0.98	0.97	1	1.01	1.01	1.01	1.01	1.02	1.03	1.03	1.03	1.01
GABARAP	1	1	0.97	0.95	0.94	0.96	0.95	0.97	1.01	1.03	1.04	1.04	1.04	1.02	1.02	1.02	1.02	1.04	1.03	1.02	1.01	1.02	1.01	0.99	0.96	1	1	1.02	1.03	1.03	1.02	1	1	0.99	1.04	1.05	1.02	1.03	1	0.98	1	1.04	1.05	1.06	1.06	1.05	1	1	1
GALNT2	1	0.92	0.79	0.77	0.81	0.91	0.93	0.94	0.94	0.91	0.95	0.94	0.93	0.93	0.92	0.93	0.93	0.93	0.91	0.9	0.89	0.91	0.9	0.97	0.95	0.9	0.9	0.9	0.9	0.89	0.9	0.88	0.88	0.88	0.93	0.94	0.95	0.94	0.93	0.93	0.94	1	0.99	0.98	0.98	1.01	1	0.98	0.99
GAP43	1	1	1.13	1.16	1.33	1.38	1.46	1.41	1.28	1.19	1.33	1.5	1.55	1.7	1.61	1.44	1.36	1.29	1.36	1.66	1.79	1.68	1.62	1.34	1.33	1.42	1.55	1.54	1.47	1.54	1.55	1.52	1.51	1.5	1.5	1.5	1.48	1.47	1.45	1.45	1.43	1.39	1.35	1.33	1.29	1.25	1.27	1.27	1.26
GLO1	1	0.99	1.02	1.03	0.99	0.98	0.98	0.98	0.98	1	1	1.01	1.05	1.08	1.07	1.09	1.12	1.14	1.17	1.23	1.22	1.2	1.19	1.19	1.18	1.17	1.16	1.14	1.12	1.13	1.14	1.13	1.11	1.12	1.09	1.11	1.11	1.1	1.1	1.1	1.15	1.14	1.11	1.11	1.11	1.12	1.08	1.06	1.05
GLRX	1	1.03	1.03	1	0.97	0.98	0.98	0.99	1	1	1.01	1.02	1.02	1.01	1.01	1.02	1.03	1.04	1.04	1.06	1.08	1.08	1.06	1.02	0.97	0.97	0.99	0.99	0.98	0.98	0.96	0.94	0.93	0.95	0.95	0.95	0.95	0.96	0.96	0.96	0.98	0.97	1	1	1.02	1.04	1.03	1.01	1
GMNN	1	0.96	0.95	0.905	0.67	0.515	0.44	0.395	0.365	0.355	0.36	0.355	0.345	0.335	0.345	0.36	0.37	0.37	0.36	0.37	0.45	0.485	0.49	0.45	0.445	0.47	0.49	0.515	0.505	0.535	0.56	0.575	0.585	0.67	0.685	0.65	0.62	0.625	0.67	0.695	0.75	0.775	0.785	0.86	0.86	0.865	0.865	0.845	0.845
GNB2L1	1	1.025	0.985	0.94	1.005	1.015	1	1.01	1.01	1.015	0.995	0.995	0.985	0.985	0.97	0.975	0.98	0.98	0.98	0.975	0.985	0.985	0.98	0.965	0.95	0.945	0.95	0.95	0.96	0.965	0.95	0.96	0.96	0.98	0.995	1.02	1.035	1.015	1.02	1.025	1.045	1.06	1.07	1.075	1.07	1.075	1.06	1.055	1.055
GNG11	1	1.02	0.94	0.88	0.97	1.19	1.27	1.29	1.19	1.07	1.08	1.01	0.99	0.94	0.94	0.97	0.98	0.99	0.97	0.95	0.83	0.8	0.86	0.85	0.83	0.81	0.78	0.77	0.8	0.81	0.77	0.74	0.74	0.74	0.73	0.73	0.77	0.71	0.64	0.58	0.57	0.62	0.64	0.65	0.65	0.64	0.64	0.62	0.62
GSPT1	1	0.99	1.03	1.06	1	1.06	1.08	1.08	1.09	1.12	1.14	1.16	1.16	1.16	1.15	1.17	1.19	1.17	1.16	1.18	1.2	1.17	1.14	1.16	1.16	1.15	1.13	1.07	1.05	1.04	1.02	1.02	1.08	1.11	1.15	1.14	1.11	1.09	1.02	1	1	1.02	1.03	1.03	1.02	1	1.02	1.03	1.02
GTF2F2	1	0.9733	1.0033	1.02	0.99	0.95	0.95	0.9633	1.0133	1.06	1.0467	1.04	1.0667	1.07	1.0767	1.0833	1.0767	1.0867	1.0867	1.0833	1.0567	1.04	1.05	1.05	1.0267	1.0233	1.03	1.0067	1.03	1.0433	1.02	0.9933	0.9967	0.9833	1	1.0233	1.0167	1.0267	1.0267	1.0333	1.0433	1.05	1.05	1.0533	1.05	1.0567	1.0567	1.06	1.0667
H2AFV	1	1.005	1.03	1.07	1.16	1.165	1.155	1.125	1.08	1.06	1.085	1.095	1.04	1.02	1.025	1.025	1.025	1.025	1.01	1.015	1.02	1.02	1.015	1.015	1.025	1.075	1.07	1.065	1.055	1.055	1.045	1.03	1.01	0.99	0.975	0.975	0.98	1.005	1.04	1.04	1.055	1.03	1.045	1.04	1.05	1.055	1.065	1.03	1.035
HAT1	1	1.035	1	0.925	1.01	1.055	1.05	1.035	0.99	0.96	0.95	0.975	0.985	1.03	1.02	1.055	1.055	1.05	1.035	1.03	1.035	1.035	1.03	1.015	1.03	1.02	0.995	0.985	1.015	1.055	1.045	1.04	1.045	1.06	1.055	1.055	1.035	1.015	1.005	1.02	1.065	1.045	1.04	1.01	1.025	1.02	1.055	1.05	1.045
HDAC2	1	1.0129	0.9743	0.98	0.99	1.0086	1.0086	1	1	1.0043	1.0071	1.0157	1.0057	1.0029	1.0157	1.0114	1.01	1.0171	1.0171	1.0171	1.0143	0.9957	0.9786	0.97	0.9829	0.9771	0.9914	1.0057	1.0114	1.0029	1	0.9971	0.9957	0.9914	0.9971	1.0029	1.0029	1.0186	1.0371	1.0414	1.0357	1.0329	1.0229	1.03	1.0186	1.0157	1.01	1.01	1.0157
hK2	1	0.96	0.98	0.94	1	0.94	0.91	0.91	0.92	0.95	0.91	0.9	0.93	0.96	0.94	0.93	0.95	0.95	1	0.99	0.99	0.98	1.05	1.07	1.11	1.15	1.18	1.14	1.04	1.05	1.03	1.06	0.95	0.87	0.86	0.88	0.87	0.94	0.94	0.91	0.93	0.93	0.92	0.9	0.89	0.89	0.88	0.89	0.93
HMG2L1	1	0.99	1.05	1.12	1	1.06	1.08	1.07	1.08	1.1	1.13	1.15	1.13	1.11	1.11	1.13	1.14	1.15	1.16	1.16	1.14	1.17	1.18	1.18	1.15	1.14	1.13	1.09	1.08	1.08	1.08	1.1	1.1	1.09	1.11	1.12	1.1	1.09	1.09	1.09	1.08	1.08	1.06	1.04	1.02	1.01	1.06	1.06	1.05
HMGA1	1	0.95	0.96	0.9	0.88	0.9	0.93	0.92	0.92	0.91	0.9	0.92	0.94	0.95	0.95	0.95	0.95	0.95	0.99	1	1.01	1.01	1.01	1.01	1.01	1.03	1.06	1.08	1.1	1.11	1.07	1.06	1.03	1.04	1.04	1.04	1.04	1	1	1.01	0.98	0.97	0.97	0.96	0.95	0.95	0.93	0.94	0.96
HMGA2	1	1.03	1.01	0.88	0.97	0.98	1	1.01	1.02	1.04	1.06	1.08	1.09	1.11	1.1	1.1	1.11	1.11	1.2	1.19	1.23	1.16	1.15	1.16	1.15	1.2	1.23	1.32	1.29	1.26	1.13	1.11	1.12	1.11	1.03	1.11	1.12	1.1	1.09	1.08	1.07	1.06	1.05	1.03	1.06	1.05	1.05	1.05	1.04
HMGB1	1	0.97	1.11	1.2	1.11	1.11	1.12	1.15	1.15	1.09	1.03	1.03	1.05	1.11	1.11	1.04	1.04	1.06	1.06	1.06	1.06	1.06	1.07	1.03	0.97	0.92	0.92	0.94	0.9	0.8	1.05	0.92	0.85	0.85	0.85	0.86	0.86	0.86	0.91	0.95	0.92	0.93	1.04	1.14	1.03	1.08	1.08	1.06	1.07
HMGN2	1	1.005	1.01	0.97	0.98	1.01	1.025	1.03	1.045	1.08	1.08	1.08	1.075	1.08	1.09	1.085	1.09	1.085	1.07	1.08	1.06	1.06	1.06	1.06	1.055	1.07	1.07	1.08	1.065	1.04	1.03	1.02	1.02	1.035	1.04	1.025	1.025	1.015	0.995	0.985	0.985	0.99	0.99	0.98	0.975	0.98	0.985	0.99	0.99
HMGN3	1	1.01	0.98	1.02	0.99	1.03	1.03	1.06	1.01	0.99	1.03	1.08	1.06	1.02	0.93	0.93	1.03	1.09	1.08	1.08	1.01	0.95	0.89	0.88	0.88	0.9	0.9	0.9	0.91	0.99	1.04	1.03	0.94	0.97	0.96	0.93	1.05	1.04	1.01	1	1.01	1	0.98	0.97	0.79	0.87	1.07	1.16	1.16
HMMR	1	1	1.14	1.15	1.18	1.11	1.1	1.07	1.12	1.12	1.2	1.17	1.17	1.26	1.22	1.19	1.17	1.17	1.17	1.16	1.18	1.18	1.17	1.16	1.12	1.1	1.1	1.1	1.1	1.03	1.11	1.12	1.11	1.11	1.1	1.1	1.09	1.07	1.04	1.02	1	1	0.99	0.98	0.98	1	0.99	1.01	1.04
HN1	1	1.015	1.035	1.04	1.07	1.11	1.105	1.095	1.065	1.05	1.035	1.03	1.025	1	0.99	0.99	0.985	1.015	1	0.985	0.985	0.985	0.985	0.995	0.99	0.975	0.97	0.945	0.93	0.94	0.955	0.955	0.94	0.955	0.955	0.935	0.925	0.92	0.92	0.89	0.87	0.88	0.885	0.875	0.885	0.905	0.935	0.935	0.955
HNRPA1	1	1.02	1.05	1.06	0.99	1	1.01	1	1.02	1.01	1.01	1.02	1.02	1.02	1.01	1	0.97	0.97	0.98	0.98	1	1.03	1	1.03	1.03	1.04	1.07	1.06	1.05	1.04	1.06	1.06	1.07	1.04	1.05	1.05	1.12	1.13	1.12	1.13	1.14	1.13	1.12	1.12	1.12	1.14	1.13	1.16	1.13
HNRPA2B1	1	0.94	0.91	0.92	0.97	0.95	0.95	0.94	0.95	0.96	0.97	0.99	1.02	1.03	1.03	1.02	1.01	1	1	1	1	1	1	1	1	1.01	1.01	1	1	1	1	1	1.04	1.03	1.04	1.04	1.06	1.05	1.04	1.01	0.99	0.99	0.99	1	0.98	0.98	0.97	0.97	0.97
HNRPA3	1	1.01	0.89	0.86	0.94	0.96	0.97	0.98	1	1.01	1.01	1	1.02	1.02	1.01	1.02	1.01	1.02	1.02	1.03	1.02	1.02	1.02	1	1	1	1.04	1.04	1.09	1.1	1.09	1.08	1.07	1.07	1.06	1.06	1.06	1.06	1.06	1.05	1.04	1.03	1.03	1.02	1.01	1.01	1.02	1.01	1.01
HNRPC	1	0.99	1.0267	1.02	0.9733	0.96	0.93	0.9433	0.9533	0.9733	1.0033	1.0133	1	1.0167	1.05	1.0633	1.0933	1.0867	1.1	1.06	1.0467	1.04	1.0467	1.03	1.02	1.01	0.9867	1	1.02	1.02	1.0167	1.0167	1.02	1.0067	1.03	1.03	1.02	1.0133	0.9967	1.0133	1.01	1	0.9967	0.9833	0.98	0.98	0.9767	0.9667	0.9767
HNRPD	1	0.87	0.9	0.71	0.71	0.67	0.65	0.65	0.73	0.75	0.81	0.81	0.79	0.76	0.73	0.74	0.75	0.7	0.7	0.74	0.79	1.07	1.08	1.08	1.06	1.1	1.11	1.09	1.03	1.04	1.04	1.11	1.09	1.12	1.06	0.86	0.71	0.71	0.73	0.68	0.59	0.62	0.65	0.65	0.64	0.66	0.66	0.69	0.7
HNRPM	1	0.98	0.94	0.97	0.92	0.92	0.9	0.89	0.91	0.92	0.94	0.95	0.97	1	1.03	1.02	1.02	1.01	1	1	0.99	0.97	0.99	1.03	0.99	0.96	0.95	0.94	0.92	0.95	0.95	0.93	0.92	0.92	0.94	0.92	0.93	0.94	0.94	0.96	0.98	1.03	1.01	0.98	0.96	0.95	0.95	0.94	0.96
HSP90AA1	1	1	0.966	0.956	0.958	0.944	0.936	0.924	0.908	0.912	0.92	0.926	0.924	0.942	0.93	0.928	0.934	0.93	0.93	0.936	0.93	0.926	0.938	0.974	0.972	0.956	0.96	0.976	0.98	0.988	0.984	0.976	0.982	0.978	0.996	1.01	1.014	1.006	1.008	1.006	1.014	1.022	1.032	1.03	1.054	1.03	1.02	1.018	1.02
HSP90AB1	1	1.05	0.995	1.04	1.09	1.08	1.195	1.28	1.155	1.085	0.995	0.945	0.83	0.8	0.81	0.845	0.87	0.87	0.89	0.995	1.145	1.225	1.385	1.39	1.39	1.125	0.93	0.9	0.895	0.905	0.92	0.92	0.92	0.915	0.865	0.815	0.785	0.81	0.81	0.815	0.815	0.81	0.815	0.81	0.795	0.775	0.75	0.745	0.745
HSPA4L	1	1.07	0.95	0.94	0.98	0.88	0.81	0.78	0.75	0.76	0.72	0.68	0.64	0.62	0.63	0.6	0.57	0.63	0.62	0.68	0.64	0.72	0.76	0.71	0.76	0.78	0.82	0.81	0.76	0.76	0.8	0.83	0.78	0.82	0.83	0.8	0.77	0.85	0.87	0.83	0.88	0.87	0.81	0.75	0.75	0.71	0.75	0.8	0.79
HSPCA	1	0.9867	1.0933	1.11	1.0533	1.0167	1	1.0333	1.08	1.0967	1.09	0.96	0.9067	0.9067	0.9567	0.9467	0.9667	0.9233	0.89	0.81	0.8533	0.8267	0.7867	0.8	0.8167	0.7967	0.7733	0.77	0.76	0.7967	0.9533	0.9833	0.9533	0.9433	0.9467	0.9967	0.9933	0.9133	0.8567	0.86	0.8367	0.7967	0.7867	0.81	0.8433	0.84	0.8467	0.84	0.8133
HSPH1	1	1.005	0.99	1.02	1.025	1.03	1.095	1.195	1.18	1.205	1.21	1.15	1.13	1.125	1.155	1.135	1.045	1.04	1.12	1.145	1.23	1.235	1.085	1.015	1.03	1.05	1.08	1.085	1.1	1.16	1.135	1.125	1.05	1.04	0.99	0.905	0.86	0.825	0.84	0.865	0.81	0.795	0.78	0.81	0.83	0.835	0.84	0.84	0.82
HYPA	1	0.99	0.97	1.01	1.02	1.04	1.06	1.02	1	1	1.02	1.04	1.05	1.03	1.04	1.04	1.04	1.04	1.05	1.05	1.02	1.02	1.03	1.02	1	1	1.02	1.02	1.03	1.03	1.04	1.04	1.05	1.06	1.06	1.06	1.06	1.06	1.05	1.06	1.06	1.05	1.06	1.07	1.08	1.07	1.06	1.08	1.08
IFT20	1	0.98	1.06	1.05	0.94	0.93	1.02	1.01	1.02	0.99	1.05	1.06	1.05	1.06	1.07	1.12	1.3	1.3	1.26	1.31	1.31	1.29	1.29	1.3	1.31	1.31	1.3	1.3	1.35	1.33	1.28	1.24	1.24	1.23	1.21	1.21	1.21	1.2	1.19	1.17	1.13	1.14	1.18	1.18	1.17	1.2	1.19	1.18	1.17
IL3RA	1	0.9967	0.9633	0.9133	0.9367	0.9267	0.92	0.9367	0.9533	0.9567	0.9433	0.9433	0.9567	0.9667	0.97	0.98	0.9833	0.9633	0.9767	0.9833	0.99	0.99	0.9667	0.98	0.99	0.9933	0.99	1.0033	1.0067	1.0133	1.0233	1.0267	1.0233	1.0267	1.0067	1	1.0067	1.0167	1.01	1.0067	1.0067	1.01	1.0133	1.0067	1	1.0033	1.0067	1.0033	1
ILF2	1	0.97	1.055	1.07	0.985	0.965	0.985	1.02	1.08	1.085	1.095	1.09	1.08	1.095	1.105	1.09	1.09	1.075	1.085	1.08	1.08	1.065	1.06	1.07	1.085	1.07	1.095	1.08	1.085	1.125	1.125	1.105	1.105	1.095	1.075	1.11	1.13	1.125	1.155	1.165	1.135	1.115	1.125	1.12	1.1	1.085	1.065	1.065	1.065
INPP4B	1	1.03	0.96	0.89	0.94	0.96	0.97	0.98	0.97	0.98	1	0.99	0.98	0.98	0.99	0.99	0.99	1	1.02	1.04	1.05	1.06	1.05	1.03	1.03	1.04	1.05	1.04	1.03	1.03	1.02	1.01	1.01	1.01	1.01	1.01	1.02	1.02	1	1	0.99	0.99	0.99	0.98	0.98	0.98	1	1.01	1
ISOC1	1	1.02	0.82	0.84	0.93	1.01	1.01	1	0.98	0.97	0.97	0.98	0.97	0.99	1.03	1.04	1.05	1.05	1.02	1.04	1.06	1.03	0.98	0.97	0.95	0.92	0.89	0.94	0.97	0.96	0.95	0.96	0.96	0.95	0.95	0.93	0.92	0.92	0.91	0.94	0.96	0.94	0.96	1.01	0.99	1	1	1.01	1.01
JAGN1	1	0.95	0.92	0.96	0.96	0.97	0.97	0.96	0.78	0.78	0.85	0.9	0.9	0.91	0.89	0.97	0.97	0.99	0.97	1	1.06	1.07	1.02	1	1.08	1.07	1.12	1.13	1.14	1.09	1.04	1.07	0.94	0.74	0.72	0.77	0.91	0.97	1.07	1.11	1.18	1.05	0.93	0.87	1.08	1.11	1.07	0.88	0.87
KATNA1	1	0.97	1.06	1.13	1.11	0.96	0.91	0.92	0.95	0.91	0.91	0.9	0.98	1	0.92	0.91	0.95	0.95	0.95	0.94	0.95	0.94	0.93	0.93	0.91	0.89	0.87	0.85	0.84	0.84	0.84	0.82	0.8	0.82	0.73	0.74	0.72	0.7	0.67	0.67	0.89	0.85	0.85	0.81	0.81	0.87	0.92	0.93	0.97
KIAA0802	1	1	1.03	1.04	0.96	0.96	0.96	0.96	0.98	1	1.01	1.02	1.02	1.03	1.03	1.04	1.04	1.04	1.04	1.04	1.04	1.02	0.99	0.98	0.98	1.02	1	1.01	1.02	1.05	1.05	1.06	1.03	1.04	1.06	1.05	1.06	1.06	1.06	1.05	1.07	1.06	1.05	1.05	1.05	1.06	1.03	1.03	1.04
KIAA1430	1	0.99	0.87	0.81	0.85	0.86	0.89	0.88	0.87	0.86	0.85	0.85	0.86	0.85	0.84	0.82	0.81	0.83	0.82	0.84	0.83	0.82	0.78	0.77	0.76	0.79	0.84	0.84	0.83	0.81	0.87	0.86	0.84	0.89	0.89	0.93	0.9	0.9	0.93	0.94	0.98	0.97	0.97	1.01	1.04	1.05	1.07	1.08	1.08
KLHL31	1	1.03	0.95	0.89	0.97	1	1.01	1.02	1.07	1.12	1.16	1.18	1.19	1.22	1.22	1.21	1.23	1.21	1.18	1.14	1.12	1.12	1.11	1.11	1.13	1.15	1.15	1.12	1.13	1.13	1.11	1.12	1.1	1.1	1.09	1.08	1.07	1.08	1.09	1.09	1.1	1.15	1.12	1.09	1.08	1.08	1.09	1.11	1.09
LARP1	1	1.03	1.07	1.12	1.01	1.05	1.06	1.08	1.12	1.15	1.16	1.19	1.15	1.21	1.21	1.2	1.27	1.23	1.24	1.27	1.34	1.34	1.36	1.35	1.35	1.3	1.29	1.28	1.28	1.26	1.24	1.23	1.22	1.22	1.2	1.2	1.25	1.26	1.24	1.22	1.16	1.09	1.09	1.1	1.06	1.06	1.06	1.07	1.08
LETM2	1	1	1.07	1.13	1	1	1.01	1.01	1.01	1.03	1.03	1.04	1.04	1.04	1.04	1.04	1.04	1.05	1.05	1.05	1.06	1.05	1.06	1.05	1.03	1.01	1.01	1.01	1.02	1.03	1.01	1.02	1.01	1.01	1.01	1.02	1.02	1.03	1.02	1.02	1.02	1.02	1.02	1.03	1.03	1.02	1.02	1.03	1.04
LGALS1	1	1.06	0.89	0.82	0.9	0.87	0.82	0.8	0.77	0.76	0.75	0.76	0.77	0.75	0.74	0.73	0.72	0.71	0.7	0.7	0.69	0.69	0.7	0.7	0.7	0.71	0.71	0.71	0.71	0.71	0.71	0.71	0.72	0.71	0.71	0.71	0.71	0.71	0.71	0.71	0.71	0.72	0.73	0.73	0.73	0.74	0.74	0.74	0.75
LIMA1	1	0.91	0.89	0.82	0.85	0.86	0.87	0.87	0.85	0.86	0.88	0.89	0.9	0.9	0.91	0.93	0.93	0.9	0.91	0.91	0.93	0.96	0.94	0.95	0.94	0.94	0.95	0.95	0.9	0.92	0.91	0.89	0.88	0.92	0.92	0.96	0.98	0.99	1.04	1.06	1.05	1.05	1.05	1.07	1.08	1.11	1.11	1.09	1.1
LMNA	1	1.01	1.0267	1.0067	0.9567	1	1.03	1.0333	1.0333	1.0333	1.03	1.0633	1.04	1.03	1.0233	1.02	1.02	1.0367	1.0333	1.0167	1.0233	1.07	1.05	1.06	1.31	1.4467	1.1367	1.0267	1.0067	0.9867	1	1.0267	1.0033	1.0033	1.01	0.9733	0.9667	0.97	1.1267	1.1367	1.1433	1.14	1.1633	1.07	1.0467	1.0367	1.0333	1.02	1.0067
LOC283551	1	0.99	1.14	1.13	1.13	1.19	1.14	1.12	1.24	1.29	1.24	1.24	1.22	1.07	0.99	1.09	1.09	1.01	0.99	1.12	1.1	1.02	1	0.98	0.98	0.97	0.95	0.95	0.95	0.94	0.97	0.95	0.93	0.75	0.75	0.99	0.98	0.97	0.95	0.94	0.93	0.95	0.92	0.95	0.94	0.93	0.97	1.07	1.05
LOC284184	1	1.03	0.95	0.94	1.01	1.02	1.05	1.09	1.11	1.12	1.06	1.03	1.08	1.05	1.04	1.04	1.04	1.08	1.07	1.06	1.07	1.06	1.05	1.03	1.02	1.02	1.03	1.02	1.02	1.01	1.01	1.02	1.01	1.02	1.05	1.08	1.09	1.11	1.1	1.08	1.09	1.09	1.09	1.09	1.1	1.1	1.1	1.1	1.1
LOC441161	1	1	0.97	1.03	0.99	0.99	0.99	1.02	1.03	1.08	1.07	1.01	0.99	0.99	0.97	0.97	0.96	0.99	0.98	1.01	1.06	1.08	1.07	1.06	1.06	1.07	1.07	1.13	1.12	1.13	1.18	1.16	1.09	1.08	1.13	1.12	1.09	1.11	1.05	1.03	1.02	1.01	1	1.08	1.1	1.09	1.07	1.08	1.06
LOC728776	1	0.87	0.73	0.67	0.75	0.78	0.8	0.78	0.77	0.81	0.89	0.9	0.91	0.9	0.86	0.88	0.89	0.9	0.91	0.97	1	0.97	1.06	1.09	1.09	1.08	1.12	1.06	0.99	0.96	0.96	0.96	0.99	0.99	0.99	0.99	0.98	0.96	0.97	0.95	0.95	0.92	0.91	0.91	0.91	0.88	0.85	0.81	0.86
LONRF3	1	0.97	1.09	1.08	1.01	0.96	0.93	0.96	1.07	1.13	1.13	1.16	1.17	1.12	1.12	1.14	1.14	1.15	1.15	1.13	1.13	1.09	1.1	1.09	1.1	1.11	1.16	1.16	1.15	1.15	1.15	1.15	1.14	1.13	1.09	1.13	1.12	1.11	1.13	1.15	1.17	1.15	1.06	1.04	1.06	1.04	1.03	1.02	1
LOXL2	1	1.01	1.03	1.05	1.03	0.98	0.96	0.95	0.97	0.95	0.96	0.93	0.91	0.91	0.91	0.92	0.97	0.98	0.98	0.94	0.94	0.92	0.93	0.95	0.95	0.95	0.96	0.95	1	1	1.01	1	0.99	1	1.02	1.04	1.05	1.06	1.08	1.07	1.05	1.04	1.05	1.03	1.01	1	1.01	0.98	0.99
LPIN2	1	0.9933	1.1067	1.0333	0.96	0.97	0.9733	0.9733	0.9833	0.98	1.0067	1.0233	1.0133	1	0.9967	0.98	0.99	0.99	1.04	1.0667	1.0233	1.03	1.0533	1.05	1.0467	1.03	1	1.0267	1.0233	1.02	1.01	0.9967	1.0133	1.0367	1.04	1.0533	1.04	1.04	1.05	1.0633	1.0567	1.0767	1.0767	1.0667	1.0567	1.05	1.0533	1.05	1.0433
LRRC59	1	0.98	1	1.04	1.15	1.26	1.28	1.31	1.32	1.3	1.3	1.27	1.17	1.12	1.11	1.12	1.12	1.11	1.1	1.11	1.15	1.21	1.21	1.23	1.21	1.32	1.34	1.37	1.33	1.44	1.43	1.48	1.42	1.39	1.51	1.48	1.44	1.42	1.38	1.36	1.3	1.28	1.26	1.26	1.28	1.28	1.23	1.24	1.23
LRRFIP1	1	0.98	0.92	0.92	0.94	0.93	0.9	0.96	0.95	0.95	0.95	0.95	0.96	0.95	0.95	0.93	0.94	0.96	0.96	0.96	0.95	0.95	0.99	0.98	0.97	0.96	0.97	0.98	0.97	0.97	0.97	0.97	0.97	0.97	1	0.99	1	1	1	1.01	1	0.98	0.97	0.97	0.99	0.99	1	1	1
LSM3	1	0.98	1.06	1.01	1.12	1.18	1.2	1.16	1.12	1.14	1.23	1.25	1.24	1.13	1.06	1	1	1.02	1.02	0.99	1.01	0.92	1.1	1.09	1.01	0.99	1.05	1.13	1.18	1.16	1.16	1.15	1.1	1.05	1.08	1.1	1.2	1.17	1.12	1.09	1.15	1.27	1.26	1.24	1.2	1.13	1.15	1.15	1.15
LYAR	1	0.65	0.59	0.75	0.67	0.58	0.56	0.54	0.53	0.53	0.53	0.51	0.54	0.56	0.55	0.55	0.55	0.55	0.63	0.63	0.62	0.6	0.6	0.7	0.76	0.75	0.84	0.92	0.84	0.81	0.82	0.81	0.81	0.81	0.85	0.84	0.93	0.95	0.97	1.06	1.1	1.08	1.08	1.09	1.08	1.08	1.08	1.07	1.08
MAP2K2	1	1.02	1.18	1.17	1.09	1.03	1.01	1	1.03	1.04	1.06	1.07	1.08	1.07	1.07	1.07	1.04	1.03	1.04	1.04	1.03	1.02	1.02	1.03	1.07	1.08	1.08	1.1	1.08	1.07	1.09	1.07	1.08	1.11	1.09	1.1	1.09	1.1	1.1	1.09	1.05	1.04	1.08	1.08	1.07	1.06	1.08	1.07	1.08
MAPK1	1	1.02	0.965	0.905	1.07	1.05	1.045	1.01	1.005	1.01	1.02	1.03	1.04	1.045	1.05	1.025	1.02	1.015	1.005	1.005	0.99	0.98	0.965	0.955	0.945	0.965	0.965	0.945	0.965	0.97	0.97	0.975	0.98	0.985	0.975	0.995	1.015	1.03	1.045	1.045	1.025	1.015	1.02	1.015	1.035	1.025	0.99	1.005	1.005
MAPKAP1	1	1.02	0.97	0.99	0.99	1	1.01	0.99	0.99	1	1.01	1.02	1.02	1.01	1	1	1.03	1.03	1.02	1.01	0.99	0.99	0.98	0.98	1.01	1	0.98	1.02	1.02	1.02	0.98	0.96	0.97	0.97	1.03	1.04	1.08	1.08	1.06	1.02	1.01	1.02	1.02	1.03	1.02	1.02	1.01	1.03	1.08
MBNL2	1	0.91	0.78	0.76	0.85	0.87	0.83	0.79	0.74	0.72	0.72	0.85	0.95	0.95	0.9	0.82	0.82	0.87	0.87	0.85	0.93	1	1.07	1.17	1.11	1.11	1.15	1.12	1.07	1.06	1.08	1.12	1.1	1.07	1.07	1	0.98	1.02	1.02	1.05	1.04	1.04	1.07	1.06	1.03	0.97	0.96	1.01	1.03
MCEE	1	1.03	0.96	0.92	0.99	0.95	0.95	0.97	0.98	0.99	1	1.01	1.02	1.02	1.02	1.04	1.03	1.03	1.02	1.04	1.03	1.03	1.04	1.04	1.05	1.06	1.03	1.01	1.01	1.01	1.02	1.02	1.01	1.01	0.99	0.98	0.97	0.94	0.92	0.95	0.96	0.96	0.97	0.97	0.96	1	1	1	1
MDH1	1	1	0.87	0.78	0.86	0.9	0.9	0.89	0.9	0.91	0.91	0.91	0.91	0.9	0.9	0.93	0.92	0.92	0.88	0.87	0.86	0.86	0.85	0.85	0.86	0.82	0.82	0.83	0.83	0.83	0.84	0.86	0.86	0.86	0.95	0.9	0.91	0.98	1	1	0.98	0.98	0.97	0.96	0.95	0.93	0.93	0.94	0.99
METAP2	1	1.0233	1.0233	0.9833	0.99	0.9667	0.97	0.9833	1.0233	1.0367	1.0633	1.0167	0.9867	0.9867	1.0033	1.0167	1.02	1.0167	1.0133	1.0067	0.99	0.97	0.9567	0.9467	0.9533	0.9567	0.9533	0.9567	0.97	0.99	0.99	0.99	0.9867	0.98	0.96	0.9533	0.93	0.9667	0.98	0.9867	0.9833	0.9833	0.9767	0.9567	0.9333	0.9367	0.94	0.9467	0.96
MGC11257	1	0.98	1.06	1.14	1	1.02	1.19	1.2	1.06	1	0.99	0.98	0.98	1	1	1.01	1	1	1.01	1.01	1.02	1.03	1.06	1.18	1.2	1.15	1.12	1.11	1.11	1.1	1.17	1.23	1.19	1.19	1.17	1.16	1.18	1.18	1.2	1.21	1.21	1.21	1.17	1.18	1.17	1.15	1.15	1.12	1.11
mimitin	1	0.995	1.01	1.035	1.005	1.01	1.015	1.035	1.045	1.045	1.04	1.045	1.055	1.055	1.03	1.05	1.035	1.02	1.025	1.015	1.02	1.05	1.085	1.09	1.08	1.06	1.03	1.035	1.015	1.02	1.005	1.015	1.025	1.03	1.02	1.02	1.03	1.03	1.01	1	1	1.02	1.015	1.01	1.005	1.005	1	1.01	1.015
MKI67IP	1	1.06	1.22	1.06	1.15	1.29	1.31	1.32	1.26	1.03	1.07	1.05	1.02	0.94	0.9	0.91	0.93	0.92	0.88	0.88	0.88	0.88	0.93	0.92	0.91	0.9	0.9	0.9	0.9	0.96	1.11	1.09	1.1	1.09	1.24	1.24	1.19	1.17	1.16	1.16	1.16	1.19	1.19	1.16	1.15	1.12	1.1	1.14	1.13
MLLT4	1	1	0.97	1.05	1.05	1.04	1.045	1.01	1.05	1.065	1.075	1.08	1.08	1.085	1.095	1.115	1.08	1.09	1.11	1.115	1.14	1.16	1.165	1.195	1.2	1.19	1.175	1.165	1.15	1.135	1.145	1.13	1.095	1.115	1.175	1.145	1.12	1.155	1.145	1.125	1.09	1.09	1.075	1.12	1.145	1.14	1.135	1.16	1.155
MRPL37	1	1.04	1.13	1.19	1.38	1.07	1.09	1.36	1.42	1.48	1.51	1.48	1.44	1.37	1.3	1.25	1.08	0.92	0.94	1.03	1.06	0.99	0.93	0.93	1.02	1.05	1.04	1.05	1.05	1.07	1.19	1.28	1.11	1.11	1.12	1.28	1.4	1.39	1.26	1.17	1.17	1.05	1.02	0.98	0.97	0.99	0.99	1	1
MRPS18B	1	1.01	1.05	0.98	1.04	1.1	1.11	1.18	1.16	1.09	1.06	1.15	1.2	1.24	1.24	1.24	1.18	1.1	1.03	1.03	1.05	1.09	1.1	1.09	1.09	1.09	1.06	1.03	1.06	1.09	1.08	1.07	1.05	1.1	1.1	1.08	1.07	1.06	1.05	1.06	1.04	1.04	1.04	1.05	1.08	1.12	1.14	1.15	1.11
MRTO4	1	1.01	1.05	1.02	0.92	0.95	0.97	0.98	1	1.01	1.01	1.02	1.02	1.03	1.04	1.06	1.06	1.06	1.06	1.08	1.16	1.16	1.09	1.08	1.07	1.06	1.02	1.01	1.02	1.02	1.03	1.04	1.03	1.01	1	1.07	1.07	1.1	1.09	1	1.03	1.04	1.13	1.15	1.14	1.13	1.1	1.06	1.04
MSRA	1	1.02	1.04	1.07	1.11	1.12	1.18	1.15	1.11	1.08	1.13	1.16	1.17	1.14	1.15	1.16	1.09	1.08	1.08	1.1	1.14	1.12	1.1	1.15	1.13	1.1	1.11	1.1	1.11	1.11	1.11	1.14	1.15	1.15	1.15	1.14	1.12	1.12	1.11	1.09	1.12	1.12	1.11	1.13	1.12	1.11	1.13	1.14	1.12
MTPN	1	1.01	0.98	0.97	0.99	0.99	0.98	0.98	1	1.02	1.04	1.1	1.12	1.12	1.09	1.08	1.05	1.05	1.08	1.06	1.06	1.11	1.07	1.05	1.04	1.04	1.02	1.01	1.03	1.03	1.03	1.01	1.01	1	1	0.95	0.94	0.95	0.95	0.93	0.93	0.88	0.83	0.83	0.84	0.84	0.86	0.87	0.92
MYH9	1	1.03	1.07	1.08	1.08	1.11	1.1	1.1	1.09	1.11	1.1	1.09	1.07	1.08	1.15	1.18	1.15	1.15	1.12	1.11	1.13	1.13	1.14	1.16	1.17	1.18	1.09	1.06	1.04	1.02	1.01	0.99	0.99	0.98	0.97	0.96	0.97	0.99	1	1	1.01	1.04	1.03	0.99	0.97	0.96	0.96	0.97	0.99
NACA	1	0.98	0.99	0.98	0.94	0.96	0.99	1.01	1.02	1.03	1.04	1.04	1.03	1.04	1.03	1.04	1.05	1.05	1.04	1.05	1.05	1.06	1.07	1.07	1.05	1.05	1.04	1.05	1.04	1.04	1.03	1.03	1.04	1.05	1.05	1.04	1.04	1.04	1.05	1.05	1.07	1.06	1.06	1.06	1.05	1.05	1.06	1.07	1.08
NASP	1	1	0.98	0.9967	0.9467	0.9467	0.9767	1.02	1.0467	1.0633	1.1933	1.2167	1.2733	1.2633	1.22	1.1833	1.1867	1.2367	1.2567	1.27	1.2333	1.2333	1.22	1.21	1.2	1.1933	1.1933	1.2367	1.2233	1.2133	1.17	1.12	1.1	1.0767	1.05	1.0633	1.0433	1.0533	1.04	1.05	0.9767	0.9833	0.9933	1.0367	1.0533	1.0567	1.05	1.0367	1.0233
NCBP2	1	1	1.05	1.05	1	1	0.99	1.01	1	0.99	0.98	0.99	0.98	0.97	0.97	0.98	0.97	0.96	0.94	0.94	0.94	0.95	0.96	0.98	0.98	1.01	1.02	1.04	1.05	1.05	1.04	1.06	1.06	1.06	1.07	1.07	1.06	1.05	1.03	1.03	1.02	1.03	1.03	1.02	1.03	1.07	1.06	1.06	1.05
NCL	1	0.98	1.0933	1.1317	1.05	1.0433	1.0417	1.05	1.0333	1.03	1.0333	1.025	1.0017	0.99	0.9967	1.005	1.0117	1.0267	1.01	1	1.0017	1.0033	0.9883	0.985	0.985	1.0033	1.0067	1.01	1.0117	1	0.9783	0.9733	0.9833	0.985	0.9733	0.9717	0.9733	0.9633	0.965	0.9933	0.9817	0.9717	0.9817	0.9967	1.075	1.0917	1.095	1.1167	1.1283
NDUFAF2	1	1	1.0667	1.0933	1.0433	1.02	0.9833	0.9667	0.9467	1.02	1.0767	1.1167	1.09	1.0467	1.0933	1.0933	1.1233	1.1333	1.1067	1.0967	1.07	1.0433	1.0333	1.0533	1.0633	1.1	1.09	1.0767	1.0633	1.06	1.06	1.0533	1.07	1.0833	1.06	1.1133	1.0967	1.0767	1.04	1	1	0.9967	0.98	0.9767	1.0033	1.0267	1.0233	1.0233	1.0067
NDUFB11	1	1.0267	1.0233	1.02	1.0933	1.1	1.12	1.1067	1.0667	0.9933	0.9833	0.9767	0.9633	0.9633	0.97	0.96	0.9267	0.95	0.9567	0.9367	0.94	0.94	0.92	0.92	0.9233	0.92	0.9267	0.92	0.9167	0.9767	0.9767	0.9633	0.9633	0.9867	1.0067	1.0367	1.03	1.0067	1.0133	1.01	0.9567	0.9433	0.92	0.8733	0.87	0.8633	0.83	0.8833	0.8667
NDUFB8	1	1.0017	0.9167	0.8617	0.905	0.9417	0.9867	1.0117	1.0483	1.0383	1.0317	1.0067	1.0267	1.0233	1.0033	0.99	1.01	1.005	0.98	0.9783	1.0183	1.0017	0.9867	1.0267	1.06	1.0667	1.0567	1.0783	1.0783	1.0767	1.0833	1.0633	1.0217	0.9983	0.9833	0.9683	0.9183	0.9117	0.925	0.9217	1.0383	1.085	1.1017	1.055	0.9417	0.9217	0.93	0.9067	0.905
NEXN	1	1.01	1.08	1.05	1	1.02	1.03	1.04	1.05	1.08	1.09	1.1	1.11	1.08	1.09	1.1	1.12	1.12	1.13	1.12	1.1	1.1	1.1	1.09	1.09	1.09	1.07	1.08	1.06	1.06	1.06	1.06	1.08	1.08	1.06	1.07	1.07	1.06	1.05	1.05	1.05	1.03	1.03	1.03	1.02	1	0.99	1	0.99
NGRN	1	0.985	1.1	1.145	1.015	0.945	0.95	0.955	0.96	0.96	0.985	1.005	1.035	1.005	0.985	0.985	0.99	0.98	0.97	0.975	0.97	0.975	0.98	1.04	1.09	1.14	1.13	1.145	1.125	1.12	1.105	1.095	1.09	1.095	1.09	1.085	1.08	1.12	1.115	1.165	1.165	1.165	1.16	1.18	1.175	1.165	1.155	1.14	1.13
NHP2L1	1	1.0067	1.01	0.9967	1.01	1.0667	1.0767	1.0667	1.06	1.0667	1.07	1.07	1.09	1.1	1.1	1.11	1.0867	1.09	1.08	1.0633	1.0467	1.0433	1.04	1.0533	1.05	1.06	1.0533	1.0467	1.0767	1.0767	1.0633	1.0667	1.1133	1.1233	1.1133	1.1233	1.1067	1.0867	1.0767	1.0867	1.08	1.0733	1.07	1.0667	1.07	1.0767	1.0967	1.1167	1.11
NME2	1	0.98	1.09	1.19	0.98	0.98	0.98	0.97	0.98	1	1	1.03	1.03	1.01	0.99	1	0.99	0.99	0.99	1	1.02	1.01	1	1.1	1.15	1.11	1.08	1.07	1.07	1.06	1.05	1.04	1.03	1.06	1.1	1.11	1.11	1.11	1.12	1.1	1.1	1.1	1.09	1.08	1.09	1.11	1.11	1.1	1.1
NME4	1	1.02	1.01	0.99	0.97	0.97	0.98	0.99	1	1.02	1.03	1.05	1.06	1.08	1.09	1.1	1.1	1.1	1.1	1.09	1.08	1.07	1.06	1.05	1.05	1.05	1.05	1.05	1.04	1.02	1.01	1.01	0.99	0.99	1	1	1	0.99	0.99	1	1	1.02	1.03	1.02	1.02	1.02	1.02	1.02	1.03
NMT1	1	1	0.97	0.99	0.98	0.97	0.96	0.95	0.94	0.94	0.94	0.94	0.96	0.97	0.96	0.95	0.95	0.95	0.97	0.97	0.96	0.96	0.96	0.96	0.96	0.97	0.98	0.98	0.98	0.97	0.96	0.95	0.95	0.95	0.95	0.94	0.96	0.97	0.98	0.99	0.98	0.98	0.98	0.98	0.97	0.97	0.97	0.98	0.96
NOL7	1	0.92	0.97	0.99	0.92	0.9	0.925	0.885	0.835	0.865	0.89	0.95	1.02	1.035	1.02	1.005	1.015	0.975	0.985	1	0.98	0.88	0.885	0.915	1.03	1.1	1.05	0.96	1.015	1.055	1.11	1.1	1.09	1.135	1.115	0.985	0.925	0.92	1.16	1.2	1.185	1.07	1.125	1.125	1.12	1.1	1.105	1.15	1.19
NPEPPS	1	0.92	0.92	0.93	0.97	0.9	0.82	0.76	0.76	0.82	0.82	0.82	0.83	0.86	0.86	0.86	0.83	0.83	0.85	0.86	0.87	0.86	0.87	0.88	0.9	0.91	0.94	0.94	0.98	1.02	1.02	1.05	1.03	1.05	1.07	1.07	1.07	1.07	1.07	1.04	1.04	1.05	1.06	1.07	1.08	1.07	1.03	1.01	1.01
NPM1	1	1.0017	1.055	1.0733	1.055	1.0717	1.0875	1.09	1.0808	1.0692	1.0725	1.0842	1.0883	1.085	1.0733	1.0825	1.0733	1.0758	1.0808	1.0975	1.1192	1.1217	1.1092	1.0883	1.0975	1.1025	1.1183	1.1183	1.1158	1.0992	1.1	1.1067	1.0975	1.0817	1.0775	1.0792	1.0933	1.0992	1.0942	1.0775	1.0675	1.0583	1.0383	1.0317	1.0317	1.0308	1.0417	1.0392	1.0592
NSMCE4A	1	1.04	0.94	0.96	1.02	1.01	0.99	0.99	0.99	0.98	0.99	1	1.02	1.03	1.03	1.04	1.04	1.06	1.04	1.03	1.03	1.03	1.02	0.99	0.97	0.97	0.99	0.99	0.99	0.99	1	1	0.99	0.98	0.97	0.96	0.97	0.97	0.99	0.99	1.02	1.01	1.01	1.01	1.02	1.02	1.02	1.01	0.99
NTAN1	1	1	1.12	1.09	1.14	1.22	1.25	1.16	1.14	1.14	1.15	1.15	1.15	1.16	1.12	1.13	1.15	1.15	1.14	1.15	1.14	1.14	1.12	1.12	1.13	1.11	1.1	1.09	1.09	1.11	1.12	1.12	1.11	1.11	1.11	1.11	1.11	1.11	1.11	1.1	1.09	1.08	1.1	1.1	1.08	1.06	1.04	1.06	1.05
NUCKS1	1	0.985	1.06	1.095	0.98	0.965	0.965	0.965	0.975	0.98	0.98	0.99	0.985	1.01	1.02	0.995	0.98	0.97	0.97	0.98	0.995	0.99	0.99	1.01	1.015	1.02	1.01	1	0.99	0.98	0.97	1.01	1.03	1.04	1.045	1.055	1.045	1.06	1.065	1.07	1.015	1.045	1.05	1.105	1.14	1.135	1.145	1.155	1.135
NUDCD2	1	0.97	0.88	0.85	0.85	0.9	0.89	0.92	0.92	1.02	1.02	1.02	1.05	1.05	1.05	1.05	1.06	1.05	1.07	1.1	1.1	1.09	1.07	1.07	1.05	1.06	1.09	1.11	1.13	1.13	1.11	1.1	1.09	1.08	1.06	1.08	1.12	1.12	1.13	1.12	1.15	1.14	1.13	1.06	1.05	1.08	1.07	1.11	1.09
NUDT3	1	0.95	0.93	1.04	1.07	1.07	1.09	1.09	1.05	1.02	1.03	1.11	1.11	1.1	1.13	1.14	1.14	1.13	1.15	1.15	1.17	1.19	1.06	1.01	0.99	1.02	1.03	1.05	0.97	0.96	0.94	0.93	0.94	0.93	0.93	0.93	0.96	0.98	0.98	1	0.96	1	1.01	1.01	1.04	1.08	1.07	1.1	1.08
PABPN1	1	0.97	1.07	1.1	0.94	0.88	0.83	0.79	0.78	0.8	0.8	0.82	0.82	0.82	0.82	0.83	0.83	0.85	0.89	0.9	0.92	0.95	0.96	0.97	1.01	1.04	1.07	1.04	1.04	1.06	1.07	1.09	1.09	1.09	1.08	1.04	1.04	1.04	1.04	1.05	1.05	1.08	1.09	1.07	1.06	1.06	1.05	1.04	1.08
PAGE1	1	1	0.97	0.97	0.92	0.96	0.97	0.96	0.98	0.99	1	1	0.99	0.98	1.01	1.02	1.05	1.07	1.08	1.1	1.12	1.14	1.1	1.09	1.09	1.08	1.11	1.16	1.19	1.22	1.21	1.23	1.22	1.2	1.16	1.17	1.18	1.18	1.16	1.16	1.16	1.15	1.15	1.15	1.17	1.15	1.14	1.15	1.17
PAK2	1	0.99	0.92	0.87	0.65	0.68	0.83	0.85	0.89	0.97	0.93	0.82	0.76	0.89	0.91	0.88	0.8	0.88	0.92	0.78	0.66	0.81	0.93	0.9	0.91	0.91	0.76	0.66	0.74	0.77	0.93	0.95	1.16	0.79	0.77	0.76	0.67	0.59	0.95	1.04	1.04	1.11	1.15	1.2	1.15	1.1	1.07	1.02	0.94
PCBD1	1	1.02	1.08	1.11	0.98	1.04	1.15	1.19	1.26	1.23	1.26	1.33	1.24	1.2	1.19	1.19	1.15	1.3	1.33	1.31	1.3	1.27	1.21	1.2	1.23	1.21	1.21	1.17	1.15	1.18	1.17	1.16	1.14	1.14	1.15	1.14	1.13	1.12	1.15	1.14	1.16	1.14	1.15	1.15	1.19	1.18	1.12	1.13	1.12
PCMTD2	1	0.99	0.99	0.97	0.96	0.97	0.96	0.96	0.96	0.94	0.94	0.94	0.94	0.95	0.95	0.95	0.95	0.95	0.97	0.98	0.99	1	1.02	1.02	1.04	1.05	1.04	1.06	1.06	1.05	1.03	1.05	1.06	1.08	1.06	1.06	1.06	1.07	1.07	1.07	1.08	1.08	1.1	1.1	1.1	1.1	1.1	1.09	1.08
PDCD5	1	0.99	1.0467	1.0667	1.0067	0.9833	0.9867	0.9967	0.9933	1.0033	0.99	0.99	1.0167	1.0367	1.02	1.01	0.9867	0.99	0.9933	1.0233	1.05	1.0567	1.05	1.04	0.9933	0.9867	0.9933	0.9933	0.9833	0.98	0.9833	0.9733	0.9667	0.9767	0.8733	0.8867	0.95	0.9667	1.01	1.0067	1.06	1.0433	1.0567	1.05	1.0733	1.0867	1.0867	1.0733	1.0733
PDIA5	1	1.02	1.1	1.18	1.17	1.1	1.1	1.1	1.11	1.16	1.16	1.11	1.1	1.08	1.06	1.06	1.08	1.07	1.06	1.06	1.08	1.08	1.1	1.08	1.06	1.05	1.04	1.05	1.05	1.05	1.05	1.04	1.05	1.06	1.07	1.08	1.06	1.05	1.05	1.05	1.07	1.06	1.05	1.06	1.04	1.04	1.04	1.05	1.07
PFDN5	1	0.988	0.97	0.95	0.992	1.026	1.014	1.028	1.044	1.042	1.026	1.04	1.052	1.072	1.066	1.072	1.1	1.11	1.122	1.134	1.144	1.164	1.15	1.164	1.152	1.156	1.162	1.158	1.154	1.134	1.132	1.14	1.148	1.142	1.136	1.13	1.126	1.116	1.12	1.124	1.126	1.112	1.122	1.128	1.128	1.124	1.122	1.132	1.126
PFN1	1	1.01	1.06	1.06	1	1.02	1.03	1.05	1.06	1.1	1.12	1.14	1.17	1.2	1.19	1.19	1.18	1.19	1.16	1.13	1.12	1.14	1.16	1.17	1.19	1.21	1.21	1.18	1.17	1.17	1.13	1.11	1.1	1.11	1.12	1.12	1.14	1.13	1.12	1.13	1.14	1.08	1.06	1.03	1.03	1.02	1.01	1.01	1.02
PGK1	1	1.03	0.96	1.02	1.05	1.04	1.03	1	1.05	1.08	1.07	1.07	1.05	1.05	1.03	1.04	1.05	1.06	1.06	1.07	1.05	1.03	1.03	1.02	1.02	1.01	0.98	0.99	1	0.99	0.99	1	1.03	1.03	1.04	1.03	1.03	1.03	1.03	1.02	1.01	1	0.99	0.98	0.97	0.97	0.95	0.95	0.94
PHPT1	1	1.03	0.85	0.82	0.93	0.93	0.87	0.82	0.8	0.77	0.76	0.77	0.78	0.8	0.81	0.82	0.83	0.85	0.86	0.85	0.83	0.82	0.82	0.84	0.83	0.81	0.83	0.88	0.88	0.94	0.96	0.95	0.96	0.97	0.93	0.92	0.95	0.97	0.95	0.93	0.92	0.94	0.96	0.95	0.95	0.94	0.95	0.95	0.97
PLEC1	1	1.0133	1.03	1.0667	1.0167	0.9967	1	0.9767	0.9733	0.9867	0.98	0.9733	0.9667	0.9767	0.96	0.9467	0.9767	0.9733	0.98	0.9833	0.9767	0.9933	0.99	0.9933	0.9967	1.01	1.0367	1.0433	1.04	1.0467	1.0567	1.0733	1.0867	1.0733	1.0633	1.0633	1.0667	1.0633	1.0733	1.0767	1.0567	1.0533	1.0667	1.0467	1.0533	1.0633	1.05	1.05	1.05
PLS3	1	1.02	0.93	0.87	0.92	0.91	0.91	0.92	1.02	1.06	1.09	1.11	1.11	1.1	1.06	0.99	0.99	0.97	1.02	1.04	1.03	1	1.07	1.08	1.1	1.09	1.06	1.05	1.08	1.13	1.12	1.09	1.02	0.97	0.95	0.94	0.97	0.95	0.94	0.94	0.93	0.92	0.92	0.92	0.89	0.93	0.92	0.91	0.89
POLR1D	1	1.0267	0.9367	0.8767	0.91	0.9267	0.94	0.9467	0.9633	0.9767	0.9733	0.98	0.9767	0.98	0.99	1.0067	1.0133	1.0133	1.03	1.0533	1.04	1.0467	1.0233	1.0167	1.0433	1.0733	1.0833	1.0633	1.0767	1.1167	1.1067	1.11	1.1033	1.0933	1.0833	1.03	1.03	1.0333	1.0233	1.06	1.07	1.0667	1.0667	1.0667	1.0667	1.0333	1.01	0.99	1.0033
POLR2F	1	0.97	1.055	1.085	1.12	1.105	1.075	1.085	1.03	0.985	0.965	0.96	0.97	0.98	0.99	0.985	1.015	1.03	1.065	1.055	1.055	1.055	1.04	1.03	1.04	1.035	1.065	1.08	1.065	1.065	1.075	1.06	1.075	1.095	1.085	1.09	1.105	1.105	1.11	1.11	1.095	1.08	1.065	1.095	1.11	1.1	1.085	1.025	0.985
POLR2G	1	1.02	1.01	0.9267	0.95	0.9367	0.9167	0.9033	0.8967	0.9	0.9167	0.9167	0.91	0.8933	0.8933	0.8933	0.8733	0.8767	0.8767	0.87	0.8767	0.88	0.8733	0.8767	0.88	0.8867	0.8833	0.9067	0.9167	0.9233	0.93	0.9167	0.8967	0.8933	0.88	0.8767	0.8767	0.8933	0.9067	0.95	0.9533	0.98	0.9867	0.9733	0.9767	0.9867	0.98	0.98	0.9667
POLR2L	1	1	1.09	1.105	1.145	1.09	1.065	1.06	1.005	0.985	0.945	0.955	0.935	0.885	0.89	0.885	0.87	0.87	0.885	0.885	0.885	0.91	0.935	0.94	0.955	0.96	0.955	0.975	0.955	0.925	0.915	0.9	0.895	0.895	0.975	1.025	1.03	1.005	0.995	1	1.055	1.09	1.08	1.02	1.025	1	0.975	0.975	0.975
POLR3GL	1	1	1.025	1.045	0.98	0.96	0.965	0.96	0.97	0.96	0.975	0.995	0.99	0.985	0.98	0.975	0.985	1.005	1	1	1	0.99	0.99	0.99	0.985	0.99	1	0.995	0.995	0.995	0.985	0.985	0.99	0.99	0.99	0.995	0.995	0.98	0.98	0.985	0.99	1	0.975	0.98	0.98	0.97	0.98	0.985	0.98
POMP	1	1.03	1.065	1.025	1.05	1.01	0.99	0.945	0.89	0.845	0.835	0.83	0.81	0.79	0.76	0.755	0.735	0.74	0.71	0.71	0.69	0.69	0.68	0.695	0.685	0.68	0.7	0.69	0.68	0.7	0.725	0.725	0.745	0.74	0.71	0.735	0.745	0.795	0.79	0.84	0.85	0.815	0.805	0.8	0.785	0.76	0.755	0.795	0.81
PPFIBP1	1	0.96	0.89	0.75	0.72	0.63	0.65	0.82	1.21	1.29	1.39	1.17	1.09	1	1.19	1.13	1.18	1.18	1.09	1.01	1	0.68	0.67	0.66	0.66	0.67	0.77	0.77	0.84	0.81	0.85	0.88	0.91	0.83	0.74	0.71	0.72	0.67	0.66	0.73	0.83	0.88	0.86	0.91	0.85	0.66	0.62	0.64	0.58
PPIA	1	0.988	0.976	0.992	0.972	0.996	1.004	1.024	1.048	1.034	1.016	1.03	1.05	1.046	1.05	1.046	1.038	1.032	1.042	1.052	1.06	1.066	1.08	1.074	1.064	1.074	1.066	1.07	1.062	1.072	1.082	1.086	1.086	1.082	1.076	1.07	1.084	1.098	1.084	1.094	1.09	1.086	1.076	1.076	1.082	1.08	1.078	1.082	1.078
PPP1R14B	1	0.95	1	1.05	0.93	0.97	0.99	1.04	1.11	1.11	1.12	1.13	1.12	1.12	1.14	1.14	1.16	1.18	1.23	1.24	1.23	1.2	1.24	1.24	1.24	1.22	1.22	1.24	1.26	1.25	1.26	1.25	1.27	1.29	1.28	1.28	1.27	1.23	1.22	1.22	1.19	1.16	1.17	1.25	1.29	1.3	1.28	1.28	1.25
PRC1	1	0.9967	1.015	0.9767	0.9917	0.98	0.97	0.9333	0.865	0.8217	0.7783	0.755	0.7133	0.68	0.655	0.6283	0.6117	0.5967	0.575	0.5633	0.565	0.5683	0.5733	0.5767	0.5783	0.575	0.58	0.5767	0.56	0.5617	0.57	0.5733	0.575	0.585	0.5983	0.605	0.6	0.6017	0.6067	0.615	0.6233	0.6283	0.645	0.66	0.6683	0.685	0.6917	0.7017	0.7133
PRDX5	1	0.995	0.99	1.01	0.97	0.91	0.88	0.88	0.87	0.855	0.825	0.81	0.79	0.755	0.8	0.81	0.815	0.795	0.775	0.755	0.755	0.77	0.78	0.765	0.805	0.82	0.845	0.855	0.855	0.825	0.775	0.76	0.755	0.76	0.775	0.855	0.855	0.845	0.865	0.85	0.91	0.91	0.905	0.855	0.845	0.825	0.83	0.815	0.795
PREPL	1	0.97	1.09	1.09	0.93	0.92	0.9	0.9	0.89	0.85	0.85	0.9	0.91	0.95	0.96	0.97	0.98	0.95	0.94	0.94	0.94	0.93	0.91	0.92	0.92	0.92	0.99	0.98	0.97	0.96	0.96	0.97	0.97	1	1.01	1.01	1.08	1.05	1.02	1	1.01	1.03	1.03	1.04	1.06	1.07	1.08	1.08	1.07
PRKAR2A	1	1.02	1.07	1.01	1.06	1.09	1.13	1.09	1.12	1.13	1.2	1.19	1.18	1.13	1.12	1.11	1.1	1.13	1.12	1.12	1.12	1.13	1.12	1.12	1.11	1.15	1.21	1.21	1.21	1.23	1.27	1.33	1.39	1.38	1.38	1.39	1.36	1.35	1.38	1.38	1.37	1.35	1.39	1.38	1.36	1.37	1.35	1.35	1.33
PROCR	1	0.99	1.08	1.32	1.13	1.06	1.08	1.12	1.15	1.15	1.16	1.15	1.15	1.18	1.17	1.17	1.18	1.18	1.2	1.21	1.2	1.22	1.24	1.23	1.21	1.2	1.26	1.33	1.31	1.29	1.39	1.4	1.38	1.32	1.3	1.29	1.28	1.27	1.28	1.26	1.25	1.27	1.27	1.26	1.23	1.24	1.25	1.25	1.26
PRR13	1	1.01	0.96	0.98	0.97	0.98	0.99	1.01	1.03	1.05	1.05	1.07	1.08	1.09	1.09	1.1	1.12	1.12	1.13	1.13	1.12	1.12	1.13	1.14	1.14	1.13	1.12	1.13	1.13	1.12	1.11	1.12	1.12	1.13	1.14	1.14	1.12	1.1	1.09	1.1	1.08	1.08	1.09	1.09	1.08	1.09	1.09	1.09	1.08
PSIP1	1	0.86	0.42	0.56	0.58	0.65	0.6	0.65	0.72	0.65	0.74	0.71	0.75	0.74	0.93	0.93	1.02	1.02	0.96	1.01	1.34	1.36	1.48	1.61	1.6	1.58	1.5	1.63	1.62	1.61	1.57	1.57	1.57	1.6	1.61	1.57	1.52	1.45	1.41	1.4	1.39	1.3	1.27	1.28	1.32	1.32	1.51	1.63	1.61
PSMA1	1	1.0125	0.9925	0.9775	1.01	1.0325	1.0425	0.9975	0.98	0.9925	0.995	0.975	0.955	0.945	0.915	0.895	0.9125	0.915	0.9325	0.9675	0.9475	0.94	0.95	0.9575	0.96	0.9675	1.0025	1.0125	1.015	1.0175	1.005	1.0075	1.0025	0.99	0.995	1	1.0225	1.0275	1.0475	1.0475	1.0175	1.03	1.0475	1.0425	1.0425	1.03	1.025	1.035	1.035
PSMA3	1	1	0.99	0.99	0.99	1.01	0.99	1.01	0.97	0.94	0.89	0.91	0.95	0.98	0.98	0.97	1.03	1.01	1.05	1.06	1.06	1.07	1.08	1.08	1.08	1.09	1.09	1.11	1.11	1.11	1.12	1.11	1.11	1.12	1.12	1.13	1.15	1.11	1.1	1.08	1.06	1.05	1.02	1	1.02	1.01	1.04	1.05	1.04
PSMA7	1	1.01	1.015	1.02	1.01	0.96	0.92	0.905	0.885	0.885	0.87	0.85	0.865	0.87	0.865	0.85	0.825	0.815	0.805	0.82	0.8	0.8	0.81	0.815	0.785	0.77	0.785	0.82	0.855	0.88	0.89	0.95	0.92	0.905	0.865	0.87	0.87	0.91	0.885	0.93	0.945	0.95	0.95	0.975	0.97	0.95	0.935	0.965	0.98
PSMB1	1	1.015	0.985	1	0.975	0.955	0.915	0.89	0.885	0.9	0.91	0.91	0.9	0.89	0.9	0.905	0.91	0.92	0.915	0.885	0.895	0.915	0.91	0.925	0.93	0.92	0.915	0.905	0.86	0.84	0.835	0.83	0.87	0.91	0.93	0.91	0.885	0.875	0.895	0.91	0.925	0.965	0.985	1	0.97	0.965	1.005	1.005	1.01
PSMB4	1	1.0233	1.02	0.9767	0.98	0.98	0.9667	0.94	0.9	0.8767	0.8633	0.8233	0.8233	0.82	0.84	0.8567	0.8633	0.8633	0.84	0.8333	0.8367	0.8333	0.8233	0.8367	0.8433	0.83	0.8233	0.8	0.8033	0.78	0.7867	0.78	0.7767	0.7767	0.7667	0.7633	0.7633	0.7567	0.74	0.73	0.7233	0.7633	0.7567	0.76	0.7733	0.7833	0.8133	0.8267	0.8333
PSMB6	1	0.975	0.95	0.9425	0.985	0.985	0.9675	0.965	0.975	0.985	0.9775	0.9825	0.9775	0.9575	0.9775	0.99	0.99	0.98	0.985	0.975	0.955	0.94	0.9575	0.96	0.9525	0.915	0.9025	0.8975	0.9025	0.91	0.9025	0.895	0.88	0.8825	0.905	0.9025	0.91	0.915	0.92	0.9225	0.925	0.93	0.9475	0.945	0.955	0.935	0.925	0.9175	0.9325
PSMB7	1	1.22	1.08	0.8	0.81	0.81	0.74	0.69	0.66	0.71	0.85	0.85	0.71	0.63	0.62	0.61	0.63	0.63	0.6	0.59	0.58	0.6	0.6	0.6	0.59	0.6	0.62	0.62	0.61	0.59	0.58	0.61	0.62	0.67	0.66	0.65	0.65	0.68	0.68	0.64	0.63	0.6	0.6	0.63	0.62	0.61	0.63	0.62	0.59
PSMC1	1	1	1.02	0.99	0.99	0.9233	0.9	0.8633	0.8433	0.8567	0.8633	0.8667	0.8433	0.8433	0.86	0.85	0.86	0.87	0.9133	1.0067	1.0733	1.0833	1.07	1.0433	1.0267	0.98	0.9867	1.0033	1.0067	1.0033	1.0567	1.0733	1.0667	1.07	1.0567	1.0767	1.0567	0.9767	0.9467	0.9367	0.9767	0.9667	0.9933	0.9733	0.8933	0.8667	0.8733	0.88	0.88
PSMC4	1	1.065	1.08	1.105	1.2	1.14	1.035	0.93	0.845	0.76	0.675	0.66	0.7	0.7	0.65	0.605	0.715	0.69	0.68	0.685	0.69	0.795	0.815	0.83	0.905	0.935	0.925	0.97	0.995	0.955	0.945	0.89	0.885	0.89	0.935	0.95	0.93	0.915	0.9	0.835	0.82	0.795	0.8	0.81	0.86	0.895	0.89	0.875	0.865
PSMD1	1	1.02	1.05	1	0.96	0.95	0.94	0.91	0.88	0.82	0.83	0.82	0.82	0.87	0.94	0.97	1.04	1.05	1.06	1.02	1.02	1.01	1.03	1.04	1.04	1	0.96	0.94	0.95	0.94	0.93	0.92	0.92	0.92	0.91	0.94	0.92	0.89	0.85	0.82	0.77	0.81	0.88	0.9	0.88	0.85	0.87	0.86	0.87
PSMD12	1	1.05	0.9	0.85	0.95	0.96	0.91	0.87	0.83	0.78	0.74	0.75	0.77	0.8	0.82	0.8	0.79	0.8	0.78	0.77	0.76	0.76	0.75	0.76	0.76	0.73	0.72	0.7	0.73	0.74	0.77	0.76	0.78	0.82	0.88	0.82	0.8	0.78	0.78	0.76	0.75	0.74	0.72	0.72	0.71	0.71	0.71	0.71	0.76
PSMD8	1	1.02	1	1.05	1.09	1.12	1.24	1.24	1.15	1.16	1.17	1.17	1.14	1.19	1.19	1.22	1.3	1.29	1.28	1.28	1.26	1.22	1.13	1.07	1.04	1.06	1.08	1.07	1.06	1.14	1.26	1.28	1.25	1.19	1.16	1.12	1.11	1.08	1.07	1.17	1.2	1.17	1.3	1.29	1.24	1.05	1	0.99	0.99
PSMF1	1	1.02	0.98	0.98	1	1.02	1.03	1.01	1.02	1.04	1.06	1.07	1.06	1.07	1.05	1.05	1.05	1.06	1.06	1.06	1.04	1.03	1.03	1.01	0.99	1.02	1.02	1.02	1	0.99	1	0.98	0.98	1.02	1.03	1	0.95	0.95	0.94	0.96	0.93	0.92	0.9	0.9	0.9	0.91	0.91	0.9	0.91
PSPC1	1	1.02	1.06	1.12	1.05	1.06	1.05	1.04	1.03	1.02	1.02	1.02	1.01	1.06	1.07	1	0.97	0.98	0.97	0.97	1	1.01	1	0.98	1	0.98	0.96	0.96	1.04	1.03	1.02	1	1	0.99	0.99	1	1	0.99	0.99	0.99	0.96	0.95	0.92	0.91	0.9	0.89	0.88	0.87	0.89
PTPN1	1	1.005	1.05	1.04	1.025	1.065	1.07	1.01	0.99	1	1	1.04	1.04	1.06	1.08	1.09	1.11	1.115	1.095	1.03	1.01	1.03	1.015	0.995	0.995	0.98	0.97	0.97	0.955	0.945	0.915	0.875	0.865	0.895	0.9	0.91	0.945	0.94	0.96	0.975	0.97	0.97	0.96	0.94	0.915	0.94	0.935	0.93	0.965
PTPN11	1	1.06	1.18	1.2	1.14	1.09	1.05	1.08	1.09	1.07	1.06	1.09	1.09	1.12	1.13	1.12	1.13	1.13	1.12	1.01	0.98	0.96	0.95	0.94	0.91	0.96	0.91	0.9	0.9	0.91	0.91	0.96	0.96	0.97	1.13	1.12	1.07	1.03	1.01	1.01	1.01	1.01	0.98	0.98	0.98	0.97	0.97	1	0.99
PTTG1IP	1	1.02	1.15	1.17	1.1	1.1	1.08	1.04	1.03	1.04	1.04	1.05	1.04	1.04	1.03	1.03	1.04	1.05	1.05	1.03	1.01	1.01	1.02	1.03	1.02	1.02	1.02	1.02	1.01	1	1	1.01	1.03	1.04	1.06	1.07	1.06	1.07	1.05	1.04	1.02	1.02	1	1	1	0.99	0.99	0.99	1
PXK	1	0.93	0.95	0.96	0.96	0.98	0.98	0.96	0.96	0.95	0.95	0.96	0.96	0.95	0.93	0.94	0.9	0.89	0.89	0.88	0.88	0.89	0.88	0.9	0.89	0.88	0.87	0.86	0.86	0.87	0.87	0.87	0.88	0.87	0.88	0.88	0.92	0.94	0.92	0.92	0.9	0.91	0.91	0.91	0.88	0.88	0.87	0.88	0.87
RAB11A	1	0.995	1.105	1.12	1.155	1.115	1.12	1.125	1.15	1.165	1.185	1.185	1.17	1.16	1.17	1.165	1.165	1.155	1.165	1.16	1.17	1.165	1.175	1.17	1.16	1.155	1.16	1.15	1.14	1.125	1.13	1.13	1.13	1.13	1.115	1.115	1.11	1.115	1.11	1.125	1.105	1.11	1.11	1.105	1.11	1.11	1.215	1.19	1.19
RAB1A	1	1.01	1.15	1.17	1.03	0.99	0.96	0.94	0.92	0.93	0.96	0.97	0.97	0.97	0.97	0.97	0.99	0.99	1	1	0.99	0.98	0.96	0.97	0.94	0.92	0.93	0.97	0.95	0.96	0.97	0.96	0.96	0.95	0.99	1	1	1.01	0.97	0.97	1.02	1.02	1.01	1.01	1.01	0.98	0.96	0.97	0.96
RAB33A	1	1.01	0.81	0.77	0.92	0.97	0.97	0.98	1	1.03	1.03	1.03	1.01	1.04	1.04	0.99	1.01	1.06	1.1	1.08	1.07	1.07	1.08	1.09	1.08	1.08	1.09	1.08	1.1	1.16	1.24	1.31	1.26	1.22	1.21	1.25	1.3	1.3	1.32	1.37	1.35	1.41	1.37	1.33	1.31	1.29	1.26	1.25	1.23
RAC1	1	1.01	1.05	1.09	1.03	0.995	1.005	1	1.005	1.005	1.02	1.01	0.99	0.97	0.975	0.95	0.95	0.945	0.955	0.97	0.97	0.935	0.925	0.92	0.88	0.865	0.875	0.885	0.89	0.87	0.865	0.87	0.875	0.88	0.87	0.87	0.875	0.86	0.85	0.835	0.84	0.845	0.855	0.855	0.84	0.82	0.82	0.835	0.85
RANBP1	1	1.02	1.03	1.07	1.12	1.06	1.06	1.14	1.15	1.11	1.1	1.1	1.07	1.08	1.08	1.1	1.1	1.06	1.03	1.04	1.04	1.09	1.1	1.13	1.23	1.35	1.33	1.18	1.04	1.04	1.08	1.11	1.12	1.14	1.12	1.08	1.09	1.09	1.08	1.1	1.13	1.1	1.07	1.05	1.05	1.04	1.04	1.04	1.04
RAVER1	1	1	1.12	1.02	1.11	1.07	1.05	1.01	0.96	0.95	0.88	0.86	0.84	0.81	0.78	0.77	0.75	0.76	0.76	0.74	0.72	0.71	0.71	0.73	0.73	0.73	0.72	0.72	0.72	0.72	0.71	0.71	0.74	0.76	0.82	0.79	0.79	0.82	0.8	0.81	0.82	0.83	0.71	0.88	0.88	0.87	0.87	0.92	0.91
RBM27	1	1	1.08	1.01	1.01	1.11	1.12	1.09	1.11	1.13	1.14	1.09	1.08	1.03	0.99	0.99	0.99	0.99	1	1.03	1.03	1.01	1.02	1.02	1.03	1.04	1.03	1	0.98	0.98	0.95	0.92	0.98	0.99	0.99	0.99	0.99	0.97	0.96	0.93	0.9	0.91	0.91	0.92	0.93	0.93	0.92	0.92	0.91
RBM41	1	1.02	0.95	0.88	0.93	0.94	0.94	0.94	0.93	0.94	0.94	0.94	0.95	0.97	0.96	0.97	1	1	0.99	0.98	0.98	0.97	0.96	0.96	0.97	0.98	0.97	0.98	0.99	0.99	0.98	0.99	1	1.01	1	0.99	0.97	0.95	0.94	0.94	0.95	0.96	0.96	0.98	0.98	0.97	0.98	0.98	0.98
RBM8A	1	1.03	0.96	0.94	0.99	0.96	0.95	0.95	0.95	0.96	0.98	0.98	0.98	0.99	1	1	0.98	0.95	0.94	0.97	0.97	1	1.01	1.01	1.04	1.04	1.04	1.02	1.02	1	0.99	0.97	1.01	0.98	0.92	0.93	1.03	1.03	1.01	0.99	1	0.97	0.95	0.95	0.96	0.96	0.96	0.95	0.96
RBX1	1	0.99	1.05	1.03	0.97	0.96	0.98	1	1.02	1.03	1.04	1.02	1	1	0.98	1	1.02	1.01	1.01	1	1	0.99	1.01	1	1.01	1.02	1	0.99	0.99	0.98	1	1	1	1	1	1.03	1.03	1.04	1.04	1.03	1.02	1.03	1.02	1.04	1.06	1.08	1.08	1.1	1.1
RFC1	1	0.975	1.01	1.03	0.99	1.01	1.025	1.03	1.035	1.03	1.02	1.025	1.03	1.03	1.01	1.01	1.005	1.005	1.015	1.015	1.005	1.01	1.005	1.005	1.02	1.01	1.03	1.03	1.035	1.045	1.045	1.05	1.05	1.055	1.055	1.055	1.065	1.06	1.07	1.065	1.07	1.07	1.075	1.09	1.095	1.1	1.1	1.12	1.145
RGS10	1	1.03	1.015	0.955	0.97	1.005	0.995	0.99	1.01	1.03	1.045	1.045	1.045	1.04	1.04	1.04	1.04	1.04	1.04	1.07	1.08	1.055	1.065	1.065	1.105	1.09	1.155	1.085	1.1	1.1	1.11	1.075	1.08	1.08	1.07	1.085	1.075	1.09	1.08	1.07	1.075	1.075	1.105	1.095	1.095	1.1	1.08	1.07	1.07
RHD	1	0.98	0.88	0.81	0.89	0.87	0.83	0.83	0.84	0.85	0.86	0.86	0.9	0.9	0.88	0.89	0.89	0.9	0.88	0.9	0.87	0.86	0.87	0.85	0.84	0.83	0.84	0.84	0.84	0.86	0.88	0.86	0.84	0.85	0.88	0.87	0.86	0.86	0.85	0.84	0.84	0.87	0.88	0.88	0.88	0.88	0.87	0.88	0.87
RPA2	1	1.025	0.925	0.93	0.935	0.91	0.96	0.95	0.89	0.865	0.87	0.845	0.895	0.91	0.93	0.92	0.915	0.93	0.955	0.95	0.975	0.95	0.865	0.825	0.815	0.815	0.795	0.77	0.805	0.78	0.765	0.81	0.75	0.745	0.8	0.83	0.855	0.815	0.805	0.81	0.81	0.795	0.785	0.805	0.81	0.835	0.845	0.835	0.81
RPL11	1	1.025	0.98	0.95	0.995	0.99	0.95	0.91	0.89	0.88	0.87	0.87	0.865	0.875	0.86	0.845	0.835	0.83	0.81	0.805	0.805	0.8	0.795	0.795	0.81	0.84	0.865	0.845	0.815	0.825	0.875	0.865	0.865	0.86	0.885	0.865	0.865	0.865	0.855	0.865	0.855	0.865	0.875	0.88	0.895	0.955	0.97	0.95	0.94
RPL13A	1	0.99	1.07	1.19	1.11	1.17	1.16	1.11	1.12	1.14	1.12	1.1	1.1	1.09	1.08	1.07	1.06	1.09	1.08	1.12	1.06	1.05	1.04	1.07	1.1	1.08	1.02	0.99	0.99	1.01	0.99	0.97	0.99	0.99	0.94	0.93	0.93	0.94	0.93	0.96	1.01	1.02	1.03	1.03	0.97	0.99	1.03	1.08	1.12
RPL18	1	1.004	1.04	1.052	0.998	0.978	0.98	1.012	1.034	1.016	0.976	0.946	0.95	0.97	1.016	1.036	0.988	0.958	0.93	0.91	0.906	0.966	0.958	0.904	0.906	0.874	0.858	0.84	0.85	0.856	0.866	0.89	0.912	0.912	0.884	0.882	0.88	0.874	0.904	0.942	0.928	0.922	0.93	0.922	0.894	0.902	0.884	0.892	0.894
RPL23a	1	0.93	0.98	1.05	1.1	1.09	1.1	1.12	1.12	1.08	1.08	1.05	1.03	1.02	1.01	1.02	1.02	1.05	1.06	1.11	1.12	1.11	1.14	1.16	1.17	1.2	1.17	1.22	1.2	1.21	1.21	1.2	1.19	1.18	1.17	1.16	1.19	1.17	1.16	1.13	1.11	1.14	1.12	1.11	1.09	1.12	1.13	1.13	1.13
RPL24	1	1.04	0.87	0.68	0.55	0.55	0.55	0.55	0.49	0.53	0.57	0.71	1	1.07	1.08	0.97	0.78	0.75	0.78	0.69	0.53	0.32	0.21	0.2	0.71	0.74	0.71	0.69	0.72	0.7	0.64	0.66	0.75	0.67	0.65	0.72	0.88	0.76	0.67	0.68	0.69	0.78	0.76	0.7	0.59	0.59	0.63	0.59	0.66
RPL27	1	0.95	0.78	0.8	0.75	0.79	0.8	0.81	0.74	0.57	0.54	0.56	0.63	0.6	0.48	0.45	0.4	0.37	0.41	0.42	0.5	0.48	0.47	0.47	0.48	0.45	0.4	0.54	0.58	0.7	0.68	0.66	0.62	0.67	0.65	0.63	0.62	0.63	0.64	0.64	0.61	0.5	0.47	0.46	0.6	0.59	0.59	0.61	0.72
RPL27A	1	0.99	1.03	1.01	0.95	0.99	0.97	0.96	0.93	0.9	0.92	0.92	0.89	0.87	0.85	0.84	0.85	0.85	0.83	0.81	0.81	0.8	0.78	0.81	0.8	0.86	0.96	0.96	0.83	0.8	0.78	0.73	0.68	0.73	0.78	0.78	0.85	0.88	0.86	0.85	0.87	0.86	0.82	0.84	0.84	0.85	0.85	0.9	0.89
RPL29	1	1.03	1.0333	1.0633	1.1267	1.12	1.0933	1.0667	1.01	0.98	0.9467	0.9233	0.8867	0.87	0.8733	0.8667	0.8567	0.84	0.8467	0.8333	0.88	0.9	0.9033	0.9167	0.97	0.9967	1.0133	1.05	1.0333	1.0133	1.02	1.0267	1.02	1.02	1.0533	1.0167	1.0233	1.0267	1.0167	1.0033	0.9667	0.95	0.9533	0.96	0.9567	0.97	0.97	0.9667	0.98
RPL30	1	1.04	1	1.025	1	0.945	0.895	0.885	0.825	0.835	0.865	0.86	0.81	0.85	0.81	0.81	0.835	0.81	0.845	0.83	0.84	0.825	0.815	0.825	0.795	0.795	0.845	0.85	0.825	0.81	0.785	0.805	0.8	0.795	0.78	0.81	0.79	0.81	0.81	0.86	0.85	0.805	0.795	0.755	0.745	0.74	0.815	0.83	0.86
RPL36	1	0.99	0.89	0.91	0.96	0.96	0.99	1	1.06	1.09	1.09	1.13	1.07	1.07	1.07	1.07	1.06	1.07	1.1	1.09	1.06	1.1	1.11	1.11	1.08	1.08	1.08	1.08	1.03	1.01	1	1.03	1.02	1.03	1.01	1	1	1.08	1.11	1.1	1.08	1.09	1.09	1.08	1.1	1.1	1.08	1.06	1.03
RPL37	1	0.97	1.04	0.99	1.01	0.99	1	1.06	1.09	1.1	1.1	1.1	1.06	1.06	1.08	1.08	1.12	1.12	1.12	1.09	1.05	1.01	1.01	1.01	1.04	1.02	0.98	0.97	0.96	0.97	0.99	1.01	1.03	1.03	1.04	1.06	1.06	1.07	1.04	1.05	1.04	1.05	1.06	1.08	1.14	1.12	1.12	1.17	1.13
RPL39	1	1.0025	1.05	1.07	1.0625	1.02	0.9725	0.94	0.95	0.95	0.9475	0.9375	0.9225	0.91	0.9	0.9	0.88	0.855	0.85	0.8725	0.8925	0.8825	0.88	0.9225	0.93	0.955	0.965	1.0025	1.0025	1.0225	1.0525	1.0725	1.065	1.0525	1.045	1.04	1.0475	1.0525	1.0525	1.04	1.0075	0.965	0.955	0.955	0.96	0.9525	0.95	0.94	0.95
RPL41	1	0.965	1.025	1.065	1.045	1.035	1.045	1.06	1.06	1.06	1.065	1.05	1.04	1.04	1.04	1.055	1.06	1.07	1.08	1.09	1.105	1.135	1.155	1.15	1.16	1.165	1.165	1.18	1.2	1.21	1.19	1.185	1.21	1.225	1.225	1.21	1.2	1.195	1.19	1.19	1.165	1.155	1.14	1.13	1.13	1.13	1.115	1.105	1.1
RPL6	1	1.03	1.0375	1.03	1.0275	0.98	0.9675	0.935	0.9	0.8725	0.8525	0.845	0.8525	0.865	0.865	0.8425	0.825	0.815	0.8275	0.8125	0.84	0.88	0.8725	0.8775	0.885	0.865	0.8675	0.8675	0.87	0.885	0.8925	0.9	0.9175	0.9	0.9025	0.9025	0.93	0.925	0.95	0.975	0.9825	1.005	0.9775	0.9825	1	1.0175	1	1	0.985
RPL7A	1	1.02	1.1	1.06	1.05	1.01	1.01	1.02	1.04	1.04	1.04	1.04	1.05	1.06	1.07	1.09	1.11	1.1	1.11	1.11	1.09	1.09	1.09	1.09	1.08	1.09	1.09	1.08	1.07	1.07	1.07	1.06	1.07	1.07	1.07	1.08	1.08	1.07	1.08	1.07	1.06	1.06	1.06	1.05	1.05	1.04	1.04	1.03	1.03
RPLP0	1	1.02	1.02	1.03	1.06	1.1	1.08	1.07	1.02	1	0.99	1.01	0.99	0.98	0.95	0.95	0.95	0.93	0.92	0.91	0.89	0.9	0.9	0.87	0.86	0.84	0.83	0.82	0.82	0.82	0.84	0.82	0.84	0.82	0.82	0.88	0.88	0.88	0.91	0.9	0.89	0.91	0.91	0.93	0.93	0.93	0.9	0.9	0.89
RPLP2	1	0.94	0.99	1.07	0.98	0.87	0.87	0.86	0.92	0.95	0.94	0.94	0.95	0.92	0.93	0.94	0.94	0.96	0.98	1	0.98	0.96	0.92	0.96	0.95	1	0.99	1.01	1.02	1	0.95	0.94	0.93	0.97	0.98	0.99	0.99	0.98	0.99	1.03	1.05	1.05	1.05	1.03	1.01	1	1.02	1	0.97
RPS12	1	1	0.995	1.005	1	0.995	0.985	0.965	0.93	0.935	0.94	0.935	0.92	0.9	0.915	0.93	0.935	0.94	0.93	0.945	0.93	0.935	0.95	0.94	0.915	0.915	0.91	0.93	0.935	0.955	0.98	0.965	0.925	0.94	0.955	0.955	0.96	0.965	0.94	0.93	0.93	0.915	0.92	0.945	0.955	0.97	0.965	0.975	0.97
RPS13	1	1.02	1.08	1.13	1.11	1.14	1.12	1.05	1.03	1.07	1.09	1.14	1.23	1.31	1.35	1.34	1.35	1.32	1.35	1.3	1.21	1.15	1.05	1.04	1.01	0.98	0.99	0.97	0.95	0.94	0.95	0.98	0.99	0.99	0.98	0.97	1.02	1.03	1.1	1.11	1.1	1.09	1.09	1.1	1.12	1.09	1.07	1.1	1.12
RPS15	1	1	1.04	1.03	0.99	1.02	1.03	1.03	1.02	1.02	1.03	1.06	1.08	1.08	1.09	1.08	1.08	1.06	1.05	1.05	1.04	1.06	1.06	1.07	1.07	1.06	1.05	1.05	1.07	1.08	1.06	1.05	1.03	1.03	1.03	1.05	1.04	1.03	1.01	0.99	1.01	1.01	1.03	1.01	1.03	1.02	1.03	1.04	1.06
RPS16	1	0.99	1.04	1.11	1.32	1.31	1.2	0.99	0.94	0.98	0.94	0.87	0.88	0.89	0.9	0.9	0.9	0.87	0.86	0.93	0.94	0.96	0.99	0.95	0.96	0.98	0.96	1.01	1.02	1.01	0.97	0.96	0.99	1.06	1.1	1.09	1.11	1.1	1.05	1.04	0.84	0.89	0.88	0.89	0.89	0.89	0.87	0.94	0.98
RPS18	1	1	1	1.02	1.13	1.16	1.19	1.26	1.23	1.18	1.16	1.18	1.25	1.23	1.23	1.26	1.3	1.28	1.24	1.23	1.17	1.17	1.17	1.17	1.16	1.18	1.23	1.27	1.29	1.31	1.31	1.33	1.31	1.29	1.3	1.31	1.3	1.3	1.3	1.28	1.33	1.36	1.4	1.34	1.31	1.29	1.29	1.28	1.24
RPS19BP1	1	1	1.0475	1.09	1.0975	1.0675	1.0525	1.045	1.045	1.04	1.05	1.0675	1.0825	1.095	1.08	1.055	1.0575	1.05	1.035	1.0275	1.0025	0.9775	0.9675	0.9675	0.965	0.9675	0.9625	0.945	0.9375	0.945	0.9425	0.9325	0.9325	0.9325	0.9275	0.895	0.8725	0.8725	0.895	0.915	0.9125	0.9075	0.8925	0.9125	0.9075	0.89	0.9025	0.8975	0.935
RPS2	1	1	1.1033	1.1433	1.05	1.0067	1.0067	1.0167	1.04	1.0767	1.0533	1.06	1.0367	0.99	0.9467	0.9267	1	1.0667	1.07	1.0267	1.0533	0.9433	0.8967	0.8933	0.9	0.9567	0.9333	0.89	0.86	0.9133	0.9033	0.9033	0.9133	0.9233	0.9233	0.9033	0.7967	0.7533	0.6967	0.67	0.6467	0.6567	0.6933	0.7333	0.7333	0.8067	0.7967	0.79	0.72
RPS20	1	1.02	1.05	1.02	1.05	1.08	1.05	1.02	1.02	1.04	1.04	1.03	1.03	1.05	1.07	1.09	1.11	1.14	1.12	1.1	1.1	1.13	1.15	1.14	1.14	1.14	1.16	1.18	1.17	1.15	1.17	1.2	1.18	1.18	1.2	1.19	1.19	1.15	1.13	1.11	1.12	1.12	1.11	1.11	1.1	1.1	1.06	1.06	1.07
RPS23	1	0.99	1.18	1.28	1.23	1.13	1.13	1.21	1.22	1.17	1.16	1.2	1.08	1.09	1.09	1.19	1.17	1.04	1.11	1.1	1.1	1.13	1.12	1.04	1.01	1	0.98	1.12	1.15	1.12	1.1	1.11	1.08	1.04	1.03	1.03	1.02	1.02	1.03	1.04	1.04	1.03	1.02	1.05	1.12	1.11	1.1	1.1	1.11
RPS24	1	1.025	0.99	0.955	0.99	1.01	1.005	1.005	1.02	1.025	1.035	1.04	1.04	1.055	1.065	1.075	1.09	1.095	1.09	1.095	1.11	1.1	1.1	1.09	1.095	1.08	1.08	1.085	1.075	1.05	1.04	1.045	1.045	1.05	1.055	1.045	1.05	1.045	1.045	1.04	1.03	1.03	1.04	1.03	1.02	1.02	1.02	1.015	1.025
RPS25	1	0.99	0.91	0.91	1.03	1.03	1.03	1.01	1.01	1.04	1.04	1.06	1.06	1.08	1.09	1.09	1.1	1.12	1.14	1.14	1.12	1.12	1.11	1.1	1.12	1.13	1.14	1.14	1.14	1.14	1.14	1.13	1.12	1.13	1.13	1.15	1.14	1.12	1.08	1.07	1.09	1.08	1.09	1.1	1.09	1.12	1.11	1.1	1.12
RPS28	1	0.98	1.01	1.05	0.97	0.96	0.96	0.93	0.92	0.91	0.9	0.91	0.91	0.91	0.92	0.91	0.94	0.94	0.94	0.94	0.97	0.96	0.97	1.03	1.02	1	1	1.01	1.04	1.02	0.98	0.98	0.98	1	0.98	0.98	1.02	1.05	1.02	1	1.03	1.02	1	1.01	1.02	1.02	1.02	1.03	1.02
RPS3	1	1.06	0.96	0.9	1.09	1.19	1.19	1.15	1.07	1.01	0.93	0.88	0.86	0.83	0.81	0.8	0.79	0.79	0.77	0.75	0.79	0.8	0.79	0.8	0.77	0.76	0.76	0.74	0.71	0.7	0.69	0.69	0.71	0.71	0.7	0.69	0.69	0.68	0.66	0.67	0.66	0.69	0.71	0.73	0.71	0.7	0.73	0.76	0.85
RPS3A	1	1	1.04	1.0367	1.075	1.0967	1.0967	1.09	1.1167	1.1517	1.1383	1.1217	1.1083	1.12	1.1117	1.0933	1.055	1.0083	0.9983	1.0033	1.015	1.0367	1.05	1.0717	1.0617	1.065	1.0567	1.085	1.1033	1.0967	1.0767	1.0733	1.0633	1.0833	1.0633	1.0417	1.045	1.0283	1.0167	0.9933	0.9833	0.96	0.955	0.93	0.925	0.925	0.9267	0.925	0.92
RPS6	1	0.9675	0.9825	1.03	1.04	1.02	0.97	0.9575	0.9525	0.94	0.93	0.9425	0.97	0.9825	0.935	0.9425	0.935	0.9525	0.9625	0.95	0.9675	0.9875	1	1.005	0.995	0.95	0.9525	0.9575	0.9525	0.935	0.935	0.9375	0.9575	0.9825	0.97	0.9625	0.95	0.9475	0.94	0.9175	0.9275	0.9325	0.915	0.895	0.8775	0.87	0.8425	0.865	0.8625
RPS7	1	0.995	1.015	1.03	0.995	0.985	0.9775	0.9675	0.9625	0.97	0.9575	0.9425	0.935	0.9275	0.9275	0.92	0.915	0.9275	0.93	0.935	0.93	0.9225	0.925	0.92	0.9175	0.9075	0.9175	0.9175	0.9075	0.9025	0.9	0.91	0.9125	0.9125	0.925	0.935	0.9475	0.9575	0.9725	0.9775	0.985	0.99	1	1.0075	1.01	1.0175	1.0225	1.0325	1.0275
RPS8	1	0.95	0.95	0.82	0.67	0.65	0.67	0.7	0.74	0.76	0.8	0.88	0.92	0.92	0.9	0.86	0.87	0.87	0.93	0.94	0.92	0.9	1.01	1.02	1.04	1.06	1.12	1.1	1.11	1.09	1.16	1.18	1.18	1.17	1.22	1.21	1.2	1.14	1.1	1.15	1.17	1.13	1.13	1.18	1.1	1.07	1.03	1.01	1.05
RRAS	1	1.03	1.03	1.02	1.08	1.1	1.11	1.09	1.09	1.11	1.16	1.09	1.04	1.04	1.04	1.06	1.06	1.07	1.07	1.05	1.04	1.04	1.04	1.04	1.03	1.03	1.04	1.01	1.01	1.01	1.01	1	0.98	0.99	1	0.99	0.98	0.98	0.97	0.97	0.97	0.97	0.98	0.98	0.98	0.98	0.96	0.96	0.98
RSL1D1	1	1	1.07	1.09	0.92	0.91	0.9	0.9	0.9	0.93	0.98	0.98	0.98	0.98	0.98	0.99	1.02	1.03	1.03	1.03	1.03	1.03	1.03	1.06	1.08	1.08	1.07	1.07	1.06	1.06	1.05	1.06	1.05	1.05	1.04	1.04	1.05	1.07	1.06	1.07	1.07	1.09	1.09	1.08	1.07	1.07	1.07	1.08	1.08
S100A10	1	0.85	0.66	0.75	0.8	0.8	0.81	0.8	0.81	0.82	0.83	0.85	0.85	0.79	0.78	0.79	0.72	0.72	0.71	0.64	0.74	0.83	0.91	0.94	0.94	1.09	1.11	1.12	1.17	1.21	1.18	1.16	1.17	1.17	1.19	1.18	1.17	1.16	1.15	1.14	1.12	1.11	1.1	1.1	1.09	1.1	1.1	1.1	1.1
SAFB2	1	1.02	1.01	0.99	0.98	0.97	0.98	0.98	0.99	0.98	0.99	1.01	1.02	1.04	1.03	1.03	1.03	1.03	1.02	1.02	1.01	1	1	1.01	1.03	1.04	1.03	1.04	1.04	1.02	1.02	1.02	1.02	1.03	1.03	1	0.96	0.95	0.94	0.94	0.94	0.96	0.95	0.93	0.95	0.97	0.97	0.97	0.99
SAP30BP	1	1.01	1.09	1.06	1.08	1.07	1.08	1.085	1.09	1.09	1.085	1.08	1.07	1.09	1.1	1.09	1.065	1.085	1.105	1.11	1.145	1.165	1.14	1.13	1.125	1.13	1.12	1.13	1.125	1.145	1.135	1.14	1.15	1.145	1.12	1.11	1.115	1.11	1.115	1.1	1.075	1.06	1.06	1.045	1.045	1.08	1.105	1.115	1.13
SCAMP2	1	1	1.09	1.15	1.19	1.2	1.21	1.29	1.37	1.36	1.31	1.19	1.06	1.07	1.09	1.12	1.16	1.22	1.21	1.12	1.11	1.13	1.11	1.16	1.15	1.12	1.12	1.1	1.12	1.13	1.15	1.14	1.15	1.15	1.13	1.05	1.03	1.08	1.07	1.15	1.14	1.18	1.18	1.15	1.16	1.2	1.22	1.19	1.19
SEC14L1	1	0.99	0.99	1	1.15	1.06	1.04	1.1	1	0.96	1.01	1.01	1.06	1.03	1.01	1.01	1.01	1.01	1.02	1.02	1.03	1.07	1.1	1.13	1.12	1.17	1.24	1.25	1.23	1.23	1.25	1.23	1.21	1.21	1.21	1.2	1.21	1.2	1.2	1.19	1.2	1.2	1.19	1.16	1.16	1.16	1.17	1.16	1.15
SELM	1	0.97	0.84	0.86	1.06	1.12	1.11	1.07	1.14	1.34	1.44	1.44	1.39	1.15	1.02	1.02	1.02	1.07	1.08	1.08	1.08	1.15	1.11	1.05	0.92	0.93	0.92	0.9	0.89	0.9	0.89	1.02	1	1	0.98	0.98	0.98	0.97	1.13	1.14	1.13	1.13	1.12	1.39	1.35	1.33	1.32	1.32	1.3
SERF2	1	0.99	0.92	0.92	0.94	0.97	0.98	0.97	0.97	0.94	0.94	0.96	0.98	0.98	0.98	0.97	0.97	0.97	0.98	0.99	0.99	0.96	0.96	0.96	0.96	0.97	0.98	0.97	0.97	0.98	0.99	0.99	1	1.03	1.04	1.04	1.03	1.04	1.03	1.02	1.03	1.04	1.03	1.03	1.04	1.05	1.05	1.07	1.05
SERPINB6	1	1.02	0.85	0.8	0.93	0.99	0.99	0.95	1.01	1.02	0.99	0.96	0.96	0.93	0.92	0.91	0.88	0.9	0.89	0.85	0.83	0.83	0.84	0.86	0.87	0.89	0.9	0.89	0.93	1.05	1.03	0.97	1.03	1.07	1.05	1.08	1.08	1.07	1.07	1.09	1.06	1.04	1.01	1.05	1.07	0.98	0.99	0.95	0.93
SF3B1	1	1	1.1	1.04	0.96	0.96	0.92	0.93	0.95	0.97	0.98	0.98	0.97	0.96	0.96	0.94	0.93	0.93	0.9	0.95	0.97	0.98	0.95	0.94	0.94	0.92	0.89	0.93	0.98	0.98	0.97	0.92	0.88	0.81	0.81	0.78	0.74	0.75	0.76	0.84	0.92	0.9	0.78	0.78	0.77	0.8	0.82	0.83	0.85
SF3B14	1	0.995	1.01	1.01	1.015	1.04	1.055	1.1	1.125	1.05	1.085	1.1	1.11	1.135	1.1	1.085	1.08	1.075	1.095	1.15	1.175	1.1	1.09	1.05	1.05	1.05	1.035	1.025	1.01	1	1.05	1.045	1.04	1.035	1.095	1.125	1.13	1.13	1.11	1.08	1.02	0.995	1.005	1	1.025	1.015	1.015	0.96	0.95
SFRS10	1	0.99	1.08	1.11	1.07	0.98	0.93	0.9	0.9	0.88	0.96	0.97	0.93	0.87	0.86	0.86	0.86	0.87	0.87	0.87	0.86	0.92	0.92	0.92	0.91	0.91	0.96	0.97	0.99	1.04	1.03	1.02	1.02	1.02	0.98	0.99	0.97	0.96	0.99	1.01	1.01	1.06	1.09	1.09	1.14	1.13	1.12	1.11	1.07
SFRS7	1	0.97	1.14	1.23	1.05	0.96	0.97	0.98	0.99	1	1.01	1.03	1.03	1.07	1.28	1.35	1.49	1.24	1.18	1.15	0.82	0.73	0.89	0.97	1.14	1.13	0.98	0.92	0.91	0.91	0.92	0.93	0.89	0.87	0.86	0.88	0.87	0.87	1	1.13	1.13	1.13	1.11	1.09	1.06	1.07	1.08	1.08	1.06
SH3GLB1	1	1.02	0.87	0.9	0.99	1.09	1	0.98	0.91	0.91	0.91	0.91	0.89	0.88	0.87	0.86	0.85	0.84	0.83	0.83	0.81	0.8	0.8	0.79	0.79	0.81	0.81	0.85	0.85	0.84	0.88	0.9	0.9	0.91	0.93	0.94	0.96	0.95	0.95	0.95	0.95	0.95	0.96	0.95	0.94	0.94	0.94	0.97	0.98
SLBP	1	1.0367	1.0967	1.14	1.0467	1.0433	1.0633	1.0533	1.0433	1.0367	1.03	1.05	1.0667	1.0633	1.0567	1.1	1.1133	1.0967	1.0567	1.0367	1.0233	1.0133	1.0633	1.0167	0.99	0.97	0.96	0.9567	0.9633	0.9567	0.9433	0.9467	0.98	0.98	0.98	0.9667	0.98	0.9733	0.96	0.9667	1.0067	0.9967	0.9867	0.9633	0.9767	0.9667	0.9733	0.9733	1.0067
SLC22A18AS	1	1	1	1	0.93	0.96	0.97	0.98	0.99	1.01	1.02	1.06	1.09	1.08	1.07	1.07	1.06	1.06	1.05	1.05	1.03	1.04	1.01	1	1	0.97	0.96	1.01	1.01	0.95	0.98	0.84	0.83	0.83	0.83	0.83	1	0.99	0.98	1.09	1.11	1.19	1.2	1.2	1.18	1.17	1.16	1.15	1.14
SLC25A37	1	1.02	0.98	0.975	1.025	0.88	0.84	1.025	1.01	0.995	1.02	0.885	0.885	0.89	0.94	0.945	0.95	0.945	0.87	0.845	0.915	0.96	0.92	0.8	0.74	0.8	0.885	0.85	0.895	0.835	0.975	0.96	0.95	0.935	0.925	0.94	0.955	0.945	0.94	0.93	0.935	0.97	0.965	0.965	0.985	0.985	0.985	0.98	0.97
SLC6A7	1	1.01	1.09	1.16	1.05	1.04	1.04	1.06	1.08	1.18	1.2	1.22	1.24	1.22	1.22	1.21	1.22	1.22	1.21	1.19	1.18	1.18	1.16	1.17	1.17	1.14	1.13	1.15	1.18	1.17	1.17	1.18	1.18	1.17	1.15	1.17	1.15	1.14	1.13	1.11	1.13	1.14	1.16	1.17	1.19	1.18	1.16	1.16	1.15
SLC9A3R1	1	0.87	0.61	0.68	0.81	0.83	0.78	0.79	0.83	0.84	0.85	0.86	0.82	0.8	0.82	0.81	0.8	0.8	0.82	0.85	0.87	0.85	0.83	0.78	0.67	0.79	0.81	0.84	0.87	0.88	0.96	1.09	1.07	1.06	1.06	1.07	1.09	1.05	1.03	1.01	1.01	0.99	0.94	0.94	0.99	0.98	0.99	0.94	0.93
SLTM	1	0.965	1.025	1.045	0.99	0.925	0.91	0.94	0.94	0.95	0.985	1.01	1.025	1.045	1.04	1.045	1.055	1.05	1.03	1.025	1.035	1.02	1.01	0.995	0.995	0.99	0.98	0.985	1	0.995	1.02	1.005	0.995	0.995	1.045	1.035	1.035	1.035	1.025	1.055	1.075	1.07	1.1	1.085	1.08	1.05	1.035	1.06	1.065
SMS	1	1.02	1.065	1.085	1.105	1.105	1.135	1.155	1.19	1.19	1.2	1.215	1.235	1.26	1.28	1.25	1.195	1.16	1.145	1.165	1.145	1.12	1.13	1.165	1.195	1.215	1.13	1.15	1.105	1.095	1.075	1.05	1.025	1.01	0.99	0.985	0.985	0.985	1	0.98	0.97	0.985	1.01	1.035	1.025	1.02	0.995	0.99	0.985
SNRPD1	1	1.02	1.02	1.02	1.02	1.01	0.99	0.97	0.97	0.98	1	1	1	1.01	1.01	1.01	1.01	1.02	1.01	1.01	1.01	1.01	1.02	1.03	1.04	1.04	1.04	1.04	1.06	1.05	1.03	1.02	1.02	1.01	1	1.01	1	1.02	1.02	1.01	1.01	1.05	1.07	1.07	1.07	1.06	1.05	1.06	1.04
SNX3	1	0.99	1.05	0.99	0.95	0.92	0.91	0.93	0.92	0.94	0.97	0.99	1.01	1.13	1.18	1.2	1.25	1.25	1.23	1.2	1.18	1.17	1.16	1.09	1.05	1.03	1.03	1.01	0.98	1.01	1.02	1	0.99	1	0.98	0.97	0.99	0.98	0.96	0.94	0.92	0.93	0.94	0.95	0.95	0.96	0.96	0.91	0.91
SPATA12	1	0.99	0.96	0.98	1.04	1.07	1.07	1.07	1.08	1.09	1.14	1.16	1.17	1.17	1.21	1.15	1.07	1.03	1.02	1.02	1.02	1	0.97	0.96	0.97	0.97	0.98	1.02	1.03	1.06	1.05	1.06	1.07	1.09	1.05	1.05	1.04	1.05	1.08	1.06	1.05	1.04	1.05	1.05	1.08	1.08	1.05	1.03	1.04
SPATS2	1	0.91	0.93	1.03	1	1.01	1.02	0.99	1	1.07	1.08	1.08	1.05	1.01	0.93	0.94	0.94	0.92	0.93	0.95	0.95	0.9	0.9	0.93	0.97	1	1.21	1.2	1.23	1.2	1.16	1.14	1.14	1.13	1.18	1.17	1.14	1.12	1.16	1.27	1.25	1.22	1.22	1.23	1.24	1.23	1.22	1.21	1.19
SPCS1	1	0.9967	1.02	1.0267	0.9933	0.9933	0.9867	0.9767	0.9733	0.97	0.9667	0.9867	0.9967	1.0133	1.02	1.0233	1.02	1.0333	1.0467	1.0533	1.0533	1.0667	1.0667	1.0767	1.0633	1.07	1.0733	1.08	1.08	1.0833	1.0833	1.0867	1.0967	1.0867	1.08	1.07	1.0633	1.0767	1.09	1.09	1.0933	1.1	1.1	1.11	1.1067	1.1033	1.0933	1.0967	1.09
SPG20	1	0.95	1	1.08	0.89	0.88	0.91	0.9	0.91	1.05	1.07	1.08	1.09	1.08	1.08	1.02	0.98	1	1	0.97	0.9	0.9	0.9	0.93	0.95	0.95	0.97	1.02	1.05	1.04	1.01	1.06	1.1	1.09	1.08	1.1	1.11	1.1	1.04	1.05	1.06	1.05	1.07	1.08	1	0.98	1.04	1.01	1
SR140	1	1.01	0.99	0.92	0.92	0.96	0.93	0.96	0.97	0.96	0.94	0.99	1.01	1.06	1.06	1.05	1	1	0.98	0.97	0.98	1	1.03	0.98	0.99	0.98	0.96	0.95	0.96	0.95	0.95	0.95	0.95	0.94	0.94	0.93	0.93	0.93	0.92	0.93	0.92	0.92	0.91	0.93	0.93	0.97	0.97	1	1.03
SRM	1	0.99	1.05	1.08	0.98	1.04	1.07	1.11	1.09	1.06	1.06	1.06	1.08	1.09	1.11	1.1	1.11	1.15	1.16	1.16	1.15	1.17	1.14	1.13	1.14	1.19	1.21	1.22	1.2	1.23	1.19	1.18	1.18	1.19	1.22	1.22	1.21	1.2	1.2	1.21	1.2	1.2	1.15	1.14	1.14	1.15	1.18	1.19	1.18
SRRM1	1	0.985	0.98	1	0.955	0.965	0.965	0.965	0.98	0.995	1.005	1	0.995	1	1.005	1.005	1.005	1.01	1.015	1.005	1	1	1.02	1.025	1.04	1.055	1.065	1.065	1.07	1.065	1.065	1.08	1.075	1.07	1.07	1.07	1.065	1.1	1.1	1.105	1.1	1.1	1.12	1.125	1.11	1.11	1.11	1.1	1.095
SSBP1	1	0.9833	0.9733	0.9967	0.9967	0.9367	0.89	0.8833	1.0767	1.1367	1.01	0.93	1.0133	1.0033	1.0167	0.9867	0.96	0.9667	0.9567	0.94	0.9633	0.9367	1	1.0333	0.9933	0.99	0.99	0.9533	0.8533	0.8667	0.83	0.8233	0.8133	0.8067	0.8033	0.79	0.8	0.7967	0.8067	0.79	0.8067	0.8433	0.8367	0.8333	0.8867	0.8767	0.8667	0.8467	0.8033
STAU1	1	1.02	1.15	1.19	1.1	1.11	1.08	1.03	1.04	1.05	1.07	1.06	1.05	1.06	1.08	1.09	1.09	1.06	1.03	1.03	1.08	1.11	1.12	1.14	1.15	1.15	1.13	1.13	1.13	1.14	1.13	1.13	1.12	1.12	1.1	1.1	1.1	1.1	1.1	1.09	1.09	1.04	1.03	1.03	1.03	1.1	1.06	1.05	1.03
STMN1	1	1.015	1.06	1.125	1.1	1.135	1.21	1.3	1.355	1.33	1.35	1.39	1.31	1.235	1.195	1.23	1.225	1.19	1.08	1.125	1.095	1.095	1.105	1.075	1.055	1.065	1.06	1.045	1.025	1.01	0.995	0.985	1.06	1.065	1.08	1.095	1.19	1.185	1.2	1.225	1.18	1.16	1.255	1.18	1.155	1.145	1.16	1.155	1.135
SUMO2	1	1.03	1.03	1.03	0.98	1	1	1	1	1.02	1.06	1.08	1.09	1.09	1.09	1.1	1.11	1.11	1.11	1.11	1.09	1.08	1.08	1.08	1.08	1.09	1.09	1.09	1.09	1.09	1.09	1.11	1.12	1.11	1.07	1.07	1.04	1.04	1.02	1.02	0.98	0.98	1	1.04	1.02	1.01	1.03	1.02	1
T85821	1	1.01	1	1	0.98	0.95	0.94	0.95	0.96	0.97	0.95	0.98	0.98	0.97	0.97	0.97	0.99	0.95	0.96	0.96	0.96	0.92	0.91	0.92	0.9	0.88	0.89	0.87	0.89	0.88	0.89	0.88	0.87	0.86	0.88	0.88	0.88	0.87	0.87	0.87	0.87	0.88	0.88	0.89	0.88	0.87	0.86	0.88	0.93
TARS	1	1.03	0.91	0.87	0.93	0.94	0.94	0.95	0.97	0.99	1	1	0.99	1	1	0.99	0.99	1	0.99	0.99	1	1	0.98	0.97	0.98	0.98	0.96	0.97	0.95	0.95	0.95	0.97	0.98	0.97	0.97	0.99	1.01	1	1.02	1.02	1.01	1	1	1.01	1.02	1	1	0.99	1
TBCA	1	1.015	0.94	0.885	0.93	0.935	0.925	0.875	0.81	0.805	0.805	0.795	0.78	0.765	0.755	0.77	0.825	0.825	0.79	0.755	0.69	0.655	0.65	0.625	0.585	0.575	0.595	0.595	0.59	0.58	0.565	0.55	0.59	0.6	0.62	0.6	0.61	0.775	0.83	0.84	0.855	0.85	0.85	0.845	0.825	0.825	0.83	0.815	0.85
TBCB	1	1.01	1.045	1.09	1.035	0.985	0.99	0.975	0.95	0.97	1.03	1.035	1.045	1.045	0.925	0.895	0.915	1.025	1.02	1.02	1.075	1.035	1.03	1.01	1	1.05	1.04	1.035	1.025	0.975	0.94	0.96	1.01	1.04	0.995	0.985	0.905	0.905	0.995	1.025	1.03	1.045	1.06	1.055	1.075	1.1	1.085	1.1	1.095
TES	1	0.96	1.02	1.05	1.08	1.05	1.04	1.02	1.03	1.09	1.12	1.11	1.05	1.03	1.04	1.03	1.02	1.02	1.03	1.04	1.04	1.04	1.07	1.06	1.05	1.04	1.01	1.03	1.02	1.04	1.05	1.07	1.07	1.06	1.04	1.02	1.03	1.03	1.06	1.06	1.05	1.05	1.06	1.07	1.06	1.07	1.06	1.05	1.06
TFAM	1	1.0267	1.0333	0.9967	0.9933	0.99	1.0033	1.0233	1.0167	1.02	1.0267	1.0267	1	1.0033	1	0.9967	0.9867	1.0033	0.9933	1.0167	1.02	1.01	1.0133	1	0.99	0.97	0.9767	0.98	0.9667	0.9567	0.96	0.9533	0.9433	0.93	0.9367	0.92	0.9167	0.9167	0.93	0.93	0.93	0.9267	0.9267	0.92	0.9233	0.91	0.91	0.9133	0.8933
TIMM23	1	1.0167	1.01	0.9833	0.9867	1.05	1.1033	1.1067	1.1133	1.1267	1.1067	1.0833	1.05	1.0533	1.0767	1.0767	1.0533	1.04	1.0367	1.02	1.01	0.9967	1.01	1.02	1.0233	1.02	1.0333	1.06	1.09	1.0733	1.0833	1.0767	1.0733	1.0667	1.0467	1.0367	1.0233	1.0167	1.01	1.0133	1.03	1.03	1.0267	1.0067	0.9933	0.9967	1.0167	1.0233	1.0267
TJP1	1	1.02	0.96	0.9	0.955	0.98	0.975	0.99	0.995	0.995	1.005	1.02	1.04	1.035	1.05	1.06	1.1	1.095	1.05	1.045	1.03	1.02	1.02	1.015	1.01	1.005	0.995	0.99	0.995	1	1.005	0.995	0.995	0.995	0.98	0.965	0.915	0.92	0.915	0.89	0.875	0.865	0.89	0.89	0.895	0.89	0.905	0.895	0.875
TLCD1	1	1	1.03	1.09	1.1	1.01	0.99	0.97	1.01	1.01	0.99	1	1.02	1.02	1.02	1.03	1.03	1.04	1.07	1.1	1.12	1.1	1.08	1.06	1.05	1.02	0.99	0.97	0.97	0.97	0.98	0.96	0.95	0.93	0.93	0.95	1	1	0.99	1.01	1.01	0.99	1	0.99	1	1.02	1.04	1.04	1.04
TLN2	1	0.99	0.99	1.02	1	0.91	0.91	0.93	0.95	0.95	0.95	0.94	1	1.06	1.07	1.05	0.99	1.03	1.03	1.04	1.07	1.06	1.02	0.99	0.98	0.98	0.95	1.04	1.03	1.03	1.02	0.99	0.99	1	1.03	1.03	1.02	1.01	0.99	0.98	0.98	1	1	1.02	1.03	1.04	1.03	1.04	1.03
TLOC1	1	0.99	1.11	1.19	1.31	1.36	1.38	1.44	1.44	1.29	1.24	1.24	1.21	1.21	1.13	1.08	1.03	0.96	1.01	1.06	1.06	1.01	1.15	1.19	1.18	1.17	1.14	1.15	1.18	1.16	1.14	1.15	1.17	1.17	1.18	1.18	1.17	1.19	1.17	1.16	1.14	1.11	1.12	1.11	1.12	1.11	1.11	1.1	1.1
TMEM123	1	0.99	0.81	0.82	0.93	0.97	0.98	0.94	0.94	0.95	0.96	0.96	1.01	1.01	1.02	1.03	1	1	0.99	0.98	0.97	0.97	0.97	0.96	0.97	0.97	0.96	0.95	0.97	0.95	0.94	0.94	0.94	0.96	0.98	0.98	1.02	1.01	1.01	1.02	1.02	1.02	1.04	1.06	1.06	1.05	1.06	1.12	1.12
TMEM132D	1	0.98	1.03	1.03	1.07	1.13	1.12	1.13	1.11	1.11	1.16	1.15	1.07	1.08	1.07	1.06	1.04	1.04	1.06	1.06	1.05	1.06	1.09	1.09	1.09	1.06	1.05	1.08	1.1	1.11	1.1	1.08	1.08	1.08	1.09	1.09	1.08	1.07	1.08	1.09	1.1	1.08	1.06	1.07	1.07	1.07	1.09	1.08	1.07
TMEM49	1	0.88	0.88	0.87	0.9	0.78	0.78	0.78	0.89	0.86	0.89	0.92	1.01	0.96	0.94	0.85	0.85	0.87	0.88	0.86	0.86	0.86	0.83	0.83	0.95	0.94	0.92	0.84	0.81	0.81	0.81	0.81	0.81	0.82	0.82	0.81	0.84	0.84	0.91	0.91	0.85	0.82	0.81	0.84	0.85	0.83	0.82	0.87	0.86
TMPO	1	0.95	0.86	0.9	0.96	0.94	0.95	0.96	0.98	0.98	0.94	0.94	0.98	0.98	0.97	0.96	0.99	0.96	0.95	0.91	0.9	0.91	0.93	0.93	0.92	0.94	0.92	0.91	0.89	0.89	0.88	0.87	0.87	0.87	0.87	0.87	0.86	0.85	0.85	0.85	0.84	0.83	0.84	0.85	0.89	0.9	0.92	0.94	0.97
TOMM70A	1	0.97	1.015	1.145	1.12	1.095	1.07	1	0.965	0.995	0.995	1.025	1.015	1.05	1.01	0.99	0.965	0.95	0.975	0.955	0.97	0.985	0.99	0.975	1.01	1.005	1	0.99	0.965	0.965	0.96	0.975	0.99	0.99	0.98	0.995	1.005	0.995	0.975	0.94	0.935	0.955	0.935	0.955	0.97	0.99	0.97	0.935	0.935
TOP1	1	0.9871	1.0086	0.9971	1.0257	0.9957	1.0057	1.0414	1.06	1.0757	1.0614	1.0543	1.0486	1.0771	1.0771	1.0486	1.05	1.0429	1.0271	1.0143	1.0171	1.0143	1.01	1.0257	1.0114	1.0214	1.0414	1.0457	1.0486	1.0586	1.0529	1.0557	1.0486	1.0371	1.0386	1.0286	1.0671	1.09	1.0886	1.0457	1.0357	1.0486	1.0557	1.0457	1.0414	1.0386	1.0357	1.0343	1.0443
TPM1	1	0.97	1.03	1.07	1.15	1.1	1.02	0.96	0.95	0.99	1	0.98	0.97	0.96	0.95	0.97	1.05	1.05	1.05	1.03	1.07	1.07	1.06	1.02	1.03	1.04	1.02	1	1	1.01	1.02	1.06	1.06	1.05	1.09	1.08	1.09	1.1	1.09	1.11	1.13	1.15	1.13	1.07	0.97	0.96	0.96	1.04	1.03
TPM3	1	1.03	0.98	0.78	0.8	0.76	0.76	0.8	0.8	0.81	0.82	0.83	0.84	0.83	0.83	0.83	0.85	0.86	0.9	0.9	0.9	0.88	0.84	0.84	0.83	0.88	0.87	0.85	0.86	0.85	0.83	0.86	0.84	0.82	0.79	0.82	0.82	0.81	0.78	0.78	0.8	0.8	0.83	0.83	0.9	0.9	0.92	0.92	0.95
TRAPPC6A	1	0.99	1	0.97	1.06	1.05	1.05	1	0.93	0.92	0.9	0.94	0.95	0.96	0.94	0.88	0.86	0.85	0.83	0.82	0.81	0.83	0.83	0.83	0.83	0.82	0.82	0.82	0.81	0.82	0.81	0.83	0.82	0.83	0.82	0.84	0.84	0.82	0.8	0.9	0.93	0.93	0.91	0.92	0.94	0.96	0.99	1.01	1.08
TRIM25	1	1	1.03	1.06	1.12	1.14	1.08	1.06	1.1	1.11	1.12	1.05	0.99	1.02	1.05	1.06	1.08	1.1	1.1	1.07	1.06	1.07	1.05	1.04	1.03	1.02	1.01	0.99	0.98	0.93	0.93	0.93	0.94	0.94	0.94	0.93	0.92	0.94	0.93	0.98	1.01	0.99	0.97	0.95	0.97	1.02	1.04	1.04	1.03
TUBA1B	1	0.9933	0.9333	0.91	0.9367	0.93	0.92	0.88	0.8733	0.8767	0.8367	0.83	0.8333	0.8467	0.8667	0.8867	0.88	0.88	0.8867	0.9133	0.9133	0.9367	0.92	0.89	0.8667	0.85	0.8867	0.8733	0.8667	0.8267	0.8233	0.84	0.8333	0.82	0.8333	0.8433	0.8333	0.8333	0.8467	0.84	0.8667	0.8767	0.8633	0.8767	0.8867	0.9033	0.9167	0.9167	0.91
TUBA1C	1	1.0333	0.98	0.93	1.0433	1.08	1.0767	1.0667	1.08	1.07	1.03	1.0033	1.0033	1.0033	1.0033	1.0067	1.02	1.0433	1.0367	1.0433	1.0167	1.0033	1.0567	1.0333	1.0067	1.02	1.0267	1.0033	1.0133	0.9833	0.99	0.9733	0.9633	0.96	0.9567	1.01	0.9833	0.9667	0.9733	0.9567	0.9433	0.9267	0.9733	0.91	0.91	0.8933	0.8833	0.8633	0.8467
TUBB2C	1	1.0367	1.0033	1	1.0033	0.98	0.95	0.9133	0.8967	0.8933	0.87	0.8633	0.8533	0.8567	0.86	0.8667	0.8633	0.8467	0.84	0.8333	0.83	0.84	0.8367	0.8367	0.81	0.83	0.8433	0.8333	0.8533	0.8567	0.86	0.8533	0.8433	0.8267	0.8333	0.8367	0.8133	0.8133	0.8133	0.8167	0.8167	0.8333	0.83	0.83	0.8267	0.8233	0.84	0.8567	0.8467
TWF1	1	1	1.01	1.01	0.96	0.96	0.96	0.95	0.97	0.98	0.99	1.01	1.01	1	1.02	1.03	1.03	1.02	1.02	1.02	1.01	1.02	1.03	1.02	1.01	1.02	1.01	1.01	1.03	1.03	1.03	1.03	1.03	1.02	1.03	1.02	1.01	1.01	1.01	1.01	1.01	1.01	1.01	1.01	1.02	1.03	1.04	1.04	1.03
TXN	1	1.01	1.005	0.99	1.0475	1.005	0.955	0.9225	0.915	0.865	0.8325	0.82	0.8475	0.895	0.8925	0.88	0.86	0.8475	0.8825	0.87	0.82	0.8275	0.805	0.805	0.78	0.7675	0.785	0.7775	0.7675	0.75	0.73	0.7075	0.675	0.655	0.705	0.7025	0.6725	0.6725	0.635	0.6225	0.605	0.64	0.6825	0.6925	0.7225	0.7275	0.7375	0.7425	0.735
TXNL1	1	1.025	0.9375	0.91	1.0025	1.06	1.0725	1.0675	1.0875	1.0425	1.0475	0.99	0.9875	1.0025	1.01	0.9925	1.0025	1.01	1.015	1.0025	0.9975	1.015	0.9975	1.0125	1.01	1.0025	0.9875	0.98	0.9825	0.975	0.9825	0.99	0.9675	0.975	0.9925	1	0.995	0.9925	0.99	1.01	1.015	0.99	0.9975	1.02	1.03	1.0375	1.03	1.045	1.0325
TXNRD1	1	1.0114	0.9629	0.9657	0.9586	0.9471	0.9157	0.8786	0.8386	0.8314	0.8386	0.8314	0.8243	0.8143	0.8057	0.7957	0.7914	0.7943	0.8086	0.8157	0.8071	0.8071	0.8029	0.8057	0.8	0.7943	0.7943	0.7786	0.7757	0.7814	0.78	0.7914	0.7929	0.7957	0.7843	0.7871	0.7914	0.7771	0.7657	0.7586	0.7686	0.7814	0.7729	0.7614	0.7586	0.7714	0.7686	0.7643	0.7714
U2AF1	1	1	0.995	1.015	0.965	1.01	1.045	1.04	1.04	1.035	1.025	1.02	1.035	1.07	1.06	1.055	1.05	1.055	1.04	1.04	1.025	1.035	1.08	1.12	1.12	1.105	1.09	1.085	1.075	1.09	1.095	1.1	1.1	1.175	1.19	1.185	1.185	1.195	1.18	1.16	1.15	1.14	1.135	1.12	1.12	1.11	1.11	1.115	1.11
UAP1	1	1.01	1.04	1.03	1.09	1.17	1.2	1.14	1.06	1.02	0.95	0.93	0.93	0.94	0.93	0.93	0.92	0.91	0.89	0.89	0.9	0.92	0.94	0.93	0.94	0.93	0.92	0.91	0.92	0.92	0.93	0.92	0.92	0.9	0.9	0.93	0.94	0.96	0.94	0.94	0.92	0.91	0.89	0.87	0.89	0.94	0.96	0.96	0.96
UBE2K	1	1.085	1.045	0.95	1.005	1.015	1.04	1.01	0.88	0.795	0.77	0.86	0.905	0.91	0.94	0.95	0.9	0.835	0.785	0.72	0.665	0.655	0.66	0.745	0.76	0.735	0.71	0.77	0.805	0.82	0.825	0.82	0.835	0.845	0.815	0.775	0.715	0.705	0.745	0.76	0.805	0.985	0.955	0.955	0.895	0.9	0.93	1.01	0.995
UBE2L3	1	1.03	0.965	0.955	0.98	0.99	0.975	0.96	0.955	0.95	0.965	0.97	0.97	0.97	0.96	0.96	0.97	0.985	0.995	1	0.99	0.995	1.01	0.995	1.005	1.01	1	1	1.01	1.02	1.005	1.005	1	1	0.99	0.98	0.985	0.98	0.98	0.98	0.975	0.98	0.985	0.985	1	0.995	0.995	1	1
UBE2N	1	0.995	1.05	1.07	0.985	0.975	1.01	1.05	1.05	1.04	0.985	0.92	0.895	0.915	1.06	1.14	1.13	1.055	1.06	1.05	1.055	1.065	1.065	0.99	0.995	1	0.98	0.975	0.95	0.93	0.915	0.915	0.925	0.935	0.97	1.04	1.035	1.09	1.065	1.04	1.04	0.89	0.865	0.89	0.9	0.91	0.915	0.93	0.875
UBE2Q2	1	1	1.01	1.02	1.04	1.09	1.13	1.13	1.14	1.16	1.15	1.17	1.16	1.14	1.13	1.14	1.13	1.1	1.08	1.1	1.13	1.13	1.11	1.11	1.08	1.1	1.14	1.13	1.15	1.19	1.16	1.12	1.18	1.21	1.21	1.18	1.18	1.17	1.17	1.15	1.09	1.09	1.12	1.11	1.1	1.05	1.03	1.03	1.06
UBE2V1	1	1.045	0.935	0.865	0.97	1.005	0.995	1	1.015	1.04	1.055	1.06	1.07	1.065	1.055	1.05	1.035	1.035	1.045	1.03	1.025	1.03	1.02	1.025	1.015	1	1.015	1.005	0.965	0.935	0.895	0.89	0.895	0.895	0.905	0.915	0.91	0.915	0.93	0.91	0.94	0.93	0.97	0.965	0.96	0.935	0.93	0.925	0.945
UBE2V2	1	1.035	1.03	1.005	1.06	0.99	0.94	0.96	0.935	0.89	0.85	0.82	0.75	0.695	0.68	0.71	0.705	0.72	0.72	0.715	0.7	0.695	0.675	0.68	0.67	0.65	0.625	0.61	0.61	0.605	0.615	0.615	0.65	0.67	0.665	0.69	0.69	0.695	0.69	0.665	0.655	0.665	0.66	0.645	0.64	0.655	0.64	0.62	0.65
UGP2	1	1.06	1.22	1.14	1.01	1.16	1.13	0.91	0.86	0.86	0.85	0.95	0.89	0.87	0.88	0.9	1.16	1.27	1.35	1.17	1.1	1.02	0.95	0.95	1.02	1	1.14	1.1	1.1	1.11	1.1	1.11	1.12	1.3	1.26	1.16	1.14	1.13	1.11	1.12	1.09	1.08	1.1	1.09	1.12	1.15	1.13	1.15	1.19
UPF2	1	1.01	0.95	0.96	0.965	0.95	0.97	0.97	0.99	1.02	1.02	1.005	1.005	1.045	1.05	1.06	1.065	1.07	1.06	1.06	1.075	1.1	1.105	1.16	1.14	1.12	1.125	1.085	1.06	1.035	1.05	1.045	1.03	1.05	1.045	1.045	1.035	1.035	1.03	1.005	0.98	0.985	0.965	0.99	0.99	0.995	0.995	0.97	0.965
UQCRB	1	1.01	0.98	0.985	1.01	1.01	0.99	0.985	0.995	0.985	0.99	1	1	1.005	0.995	1.005	1.01	1.015	1.005	0.995	0.965	0.96	0.975	0.985	0.97	0.975	0.985	0.975	0.975	0.975	0.965	0.955	0.95	0.98	0.98	0.985	1	0.975	0.99	0.985	0.995	1.02	1.03	1.025	1.02	1.01	1.02	1.04	1.035
UQCRFS1	1	1.03	0.8	0.79	0.91	0.95	0.96	0.98	0.99	1	1	1	0.98	0.97	0.95	0.94	0.94	0.94	0.96	0.95	0.95	0.94	0.91	0.92	0.9	0.89	0.92	0.97	0.97	1	1.03	1.04	1.08	1.09	1.09	1.07	1.06	1.11	1.12	1.11	1.17	1.13	1.14	1.13	1.1	1.08	1.07	1.07	1.06
USP14	1	1.03	0.96	0.88	0.91	0.92	0.9	0.88	0.88	0.85	0.92	0.93	0.93	0.93	0.94	0.93	0.94	0.94	0.94	0.93	0.92	0.92	0.92	0.94	0.93	0.92	0.92	0.92	0.92	0.92	0.92	0.94	0.94	0.95	0.94	0.94	0.93	0.93	0.92	0.88	0.86	0.89	0.89	0.89	0.93	0.93	0.92	0.95	0.95
VASP	1	0.98	1.11	1.11	0.92	0.88	0.84	0.82	0.85	0.82	0.79	0.79	0.77	0.77	0.76	0.76	0.76	0.76	0.76	0.78	0.79	0.81	0.85	0.86	0.85	0.81	0.8	0.84	0.83	0.76	0.72	0.71	0.73	0.73	0.74	0.73	0.75	0.75	0.72	0.71	0.71	0.74	0.74	0.73	0.7	0.69	0.68	0.67	0.66
VBP1	1	0.94	0.97	1.01	1.11	1.09	1.1	1.12	1.12	1.06	0.97	0.93	0.92	0.88	0.87	0.87	0.87	0.84	0.85	0.84	0.83	0.85	0.84	0.84	0.81	0.86	0.87	0.89	0.88	0.88	0.88	0.87	0.85	0.9	0.96	0.95	0.96	1.01	1.07	1.05	1.08	1.07	1.04	1.01	1.03	1.06	1.06	1.05	1.07
VCL	1	1.02	1.0967	1.1367	1.0967	1.0867	1.05	1.06	1.0467	1.04	1.01	0.9933	0.9733	0.9633	0.9567	0.97	0.9733	0.9833	1.0033	1	0.98	0.9633	0.9233	0.9133	0.88	0.86	0.8867	0.8833	0.89	0.9067	0.9067	0.8767	0.87	0.8733	0.8867	0.87	0.8567	0.85	0.84	0.8333	0.8367	0.8433	0.87	0.86	0.8933	0.8833	0.8767	0.8733	0.8633
VIL2	1	1.0333	1.03	1.0733	1.13	1.1133	1.0833	1.06	1.0267	0.9433	0.89	0.8867	0.86	0.87	0.8267	0.8067	0.84	0.86	0.9467	0.94	0.9133	0.9133	0.9067	0.9	0.9167	0.9133	0.9	0.86	0.8433	0.8533	0.85	0.83	0.83	0.82	0.8767	0.8867	0.8433	0.8133	0.7933	0.78	0.78	0.7967	0.82	0.8233	0.84	0.88	0.8833	0.8767	0.86
VPS26A	1	0.9875	0.9725	0.9675	0.9888	0.9975	1.0013	0.9975	0.9938	0.99	0.9825	0.995	1.0075	1.0188	1.0163	1.01	1.0075	1.0163	1.0162	1.0075	1.0025	1.0162	1.0213	1.0313	1.035	1.0413	1.0462	1.0488	1.0413	1.0438	1.0337	1.0112	1.0137	1.0113	1.0125	1.0125	1	0.9925	1.0063	1.01	1.0038	1.0013	1.0075	1.015	1.0162	1.0225	1.015	1.0125	1.0013
vPS26A	1	1.02	1.015	1	0.995	1.005	1.01	1.01	1.015	1.03	1.035	1.055	1.06	1.065	1.07	1.08	1.08	1.08	1.075	1.09	1.095	1.1	1.105	1.11	1.105	1.09	1.085	1.08	1.09	1.08	1.075	1.075	1.065	1.065	1.05	1.055	1.065	1.06	1.065	1.065	1.08	1.1	1.09	1.08	1.075	1.085	1.08	1.075	1.065
VPS4B	1	1	0.96	0.95	0.98	0.97	1	1.04	1.07	1.06	1.06	1.07	1.08	1.08	1.11	1.14	1.15	1.16	1.16	1.18	1.16	1.16	1.15	1.14	1.14	1.14	1.13	1.11	1.13	1.11	1.1	1.08	1.11	1.13	1.14	1.18	1.14	1.15	1.15	1.19	1.18	1.17	1.16	1.12	1.12	1.16	1.19	1.19	1.17
WASF2	1	0.99	0.97	0.94	0.98	1	0.98	0.98	0.96	0.98	0.98	0.95	0.94	0.96	0.99	1	1.02	1.03	1.05	1.02	1	1.04	1.05	1.05	1.04	1.05	1.05	1.09	1.08	1.07	1.1	1.12	1.11	1.09	1.09	1.09	1.09	1.1	1.08	1.03	1.03	1.04	1.06	1.06	1.06	1.06	1.05	1.06	1.04
WDR43	1	1	0.99	1	0.98	0.99	1	0.98	0.98	1	1.02	1.03	1.07	1.06	1.08	1.09	1.09	1.11	1.08	1.07	1.08	1.08	1.06	1.06	1.1	1.1	1.12	1.1	1.09	1.09	1.08	1.08	1.07	1.08	1.08	1.09	1.08	1.07	1.07	1.08	1.09	1.11	1.1	1.09	1.1	1.09	1.07	1.06	1.05
XAGE1D	1	1	0.94	0.97	0.96	1	1.04	1.05	1.07	1.08	1.08	1.09	1.12	1.13	1.14	1.15	1.21	1.22	1.23	1.23	1.26	1.27	1.28	1.29	1.3	1.3	1.3	1.3	1.24	1.23	1.3	1.28	1.28	1.28	1.29	1.27	1.25	1.18	1.17	1.17	1.19	1.19	1.18	1.18	1.18	1.17	1.16	1.19	1.24
YAP1	1	1.01	1.03	1.04	1	1.01	1.01	1.01	1	1	1.01	1.03	1.03	1	1	0.99	0.99	0.96	0.95	0.94	0.94	0.95	0.97	0.99	0.98	1.01	1.02	1.01	1.03	1	0.99	0.97	0.98	0.98	1	0.99	0.99	1	1	0.99	0.97	0.97	0.95	0.95	0.96	0.99	1	1.02	1.02
YBX1	1	1.005	1.11	1.09	1.015	0.95	0.9	0.88	0.845	0.835	0.82	0.815	0.795	0.77	0.77	0.78	0.785	0.81	0.84	0.87	0.865	0.845	0.79	0.785	0.785	0.78	0.8	0.825	0.805	0.795	0.81	0.82	0.84	0.85	0.82	0.815	0.86	0.87	0.86	0.845	0.845	0.86	0.86	0.855	0.865	0.87	0.865	0.86	0.87
YTHDC1	1	0.97	1.11	1.13	1.07	1.01	1.07	1.07	1.13	1.15	1.14	1.11	1.08	1.08	1.08	1.09	1.08	1.1	1.09	1.09	1.09	1.1	1.1	1.1	1.09	1.09	1.09	1.06	1.06	1.04	1.03	1.03	1.07	1.09	1.15	1.16	1.08	1.07	1.06	1.09	1.07	1.07	1.08	1.08	1.07	1.06	1.07	1.08	1.08
YWHAE	1	1.02	1.11	1.09	0.96	0.98	1	0.96	1.03	1.08	1.13	1.1	1.08	1.06	1.04	1.04	1.01	0.99	1	1.01	1.01	0.94	0.93	0.91	0.89	0.85	0.82	0.81	0.82	0.82	0.82	0.8	0.79	0.78	0.78	0.77	0.76	0.72	0.7	0.69	0.69	0.67	0.66	0.71	0.72	0.72	0.82	0.81	0.91
YY1	1	0.93	1.03	1.15	0.94	0.92	0.93	0.94	0.97	1	1.04	1.04	1.02	1.04	1.07	1.08	1.08	1.06	1.05	1.04	1.05	1.05	1.08	1.1	1.12	1.11	1.12	1.12	1.12	1.12	1.13	1.17	1.19	1.2	1.24	1.26	1.26	1.24	1.22	1.22	1.22	1.21	1.22	1.22	1.22	1.21	1.19	1.2	1.2
ZC3H4	1	0.945	1.055	1.095	0.905	0.89	0.915	0.93	0.99	0.995	1.01	1.03	1.025	1.025	1.035	1.055	1.045	1.035	1.015	1.02	1	0.995	1.01	1.01	1.04	1.085	1.1	1.105	1.095	1.075	1.035	1.035	1.03	1.075	1.095	1.175	1.155	1.125	1.125	1.21	1.21	1.205	1.18	1.165	1.17	1.175	1.19	1.18	1.155
ZFAND2A	1	0.99	0.98	1	1.01	1.01	1	1.03	1	1.05	1.02	1.03	0.98	0.97	0.97	0.97	1.02	1.02	1	0.97	0.98	0.96	1.02	1.03	1.05	1.04	1.05	1.04	1.05	1.04	1.02	1.04	1.04	1.01	1.03	1.04	1.09	1.17	1.1	1.12	1.09	1.06	1.05	1.04	1.04	1.04	1.04	1.06	1.07
[truncated: 20 more columns]

## Sheet: meidan_pixel_protein
	frames	a frame was taken each 20 minutes - so 3 frames correspond to 1 hour)
Name	1	2	3	4	5	6	7	8	9	10	11	12	13	14	15	16	17	18	19	20	21	22	23	24	25	26	27	28	29	30	31	32	33	34	35	36	37	38	39	40	41	42	43	44	45	46	47	48	49
AA282714	1	0.98	1	1.06	1.09	1.11	1.1	1.17	1.27	1.28	1.27	1.27	1.33	1.31	1.28	1.25	1.06	1	1.01	1.03	1.03	0.97	0.94	0.96	1	1.02	1.02	1.05	1.03	1.04	1.1	1.1	1.11	1.11	1.12	1.13	1.1	1.09	1.1	1.1	1.1	1.12	1.14	1.13	1.12	1.11	1.12	1.11	1.12
ACAD11	1	1.02	1.06	1.1	1.05	0.97	0.91	0.85	0.81	0.79	0.76	0.74	0.73	0.73	0.75	0.74	0.72	0.71	0.71	0.72	0.73	0.72	0.72	0.65	0.66	0.67	0.71	0.7	0.69	0.67	0.7	0.71	0.7	0.69	0.69	0.69	0.68	0.75	0.73	0.73	0.74	0.73	0.71	0.65	0.71	0.72	0.71	0.76	0.76
ACOT7	1	1.01	1.04	1.02	1.03	1.04	1.05	1.06	1.06	1.08	1.1	1.09	1.07	1.01	0.99	0.99	0.99	0.99	0.95	0.94	0.96	0.95	0.95	0.95	0.97	0.97	0.98	0.94	0.93	0.97	0.99	0.96	0.92	0.89	0.88	0.88	0.89	0.92	0.93	0.95	0.96	0.97	0.96	0.95	0.94	0.93	0.94	0.95	0.95
ACTN4	1	1	1.02	1.04	1.09	1.08	1.08	1.07	1.02	1.01	1.04	1.13	1.23	1.26	1.26	1.33	1.25	1.28	1.16	1.19	1.14	1.12	1.16	1.13	1.14	1.21	1.32	1.36	1.42	1.28	1.22	1.17	1.22	1.26	1.22	1.2	1.16	1.16	1.13	1.17	1.26	1.23	1.17	1.06	1.02	1.06	1.17	1.18	1.18
ACTR1A	1	0.98	1	1.03	1.03	1.05	1.06	1.12	1.15	1.15	1.1	1.12	1.16	1.18	1.21	1.23	1.31	1.26	1.26	1.24	1.26	1.26	1.29	1.33	1.39	1.44	1.43	1.32	1.3	1.32	1.32	1.31	1.28	1.26	1.27	1.26	1.24	1.14	1.12	1.17	1.13	1.15	1.14	1.09	1.09	1.08	1.07	1.06	1.06
ACTR2	1	1.04	1.1	1.08	1.08	1.08	1.1	1.09	1.09	1.09	1.1	1.09	1.1	1.1	1.11	1.1	1.1	1.1	1.1	1.1	1.1	1.1	1.1	1.1	1.1	1.1	1.11	1.11	1.09	1.1	1.12	1.12	1.12	1.12	1.12	1.12	1.1	1.08	1.08	1.07	1.06	1.06	1.05	1.04	1.03	1.01	1.01	1.02	1.01
ACYP2	1	1	1.05	1.05	1.06	1.09	1.11	1.13	1.14	1.15	1.13	1.1	1.09	1.11	1.13	1.13	1.12	1.13	1.14	1.1	1.11	1.12	1.17	1.23	1.24	1.25	1.23	1.25	1.26	1.22	1.15	1.16	1.14	1.14	1.14	1.15	1.16	1.13	1.14	1.14	1.09	1.06	1.06	1.03	1.03	1.05	1.08	1.1	1.1
ADK	1	0.965	0.955	0.965	1	1.035	1.055	1.09	1.09	1.07	1.055	1.04	1.025	1.03	1.025	1.035	1.01	1.01	1.005	1.015	0.995	1.015	1.015	1.01	0.995	0.995	1.01	1.035	1.04	1.02	1.015	1.01	0.995	0.995	1.01	1.015	1.02	1.02	0.995	0.99	0.985	0.985	1.02	1.055	1.07	1.1	1.08	1.095	1.07
AF086125	1	0.99	0.99	0.98	0.99	1.06	1.07	1.02	1.07	1.15	1.15	1.16	1.15	1.12	1.09	1.06	1.04	1.08	1.09	1.13	1.11	1.14	1.11	1.11	1.09	1.06	1.05	1.06	1.15	1.16	1.17	1.17	1.17	1.17	1.19	1.19	1.2	1.2	1.31	1.28	1.31	1.28	1.24	1.22	1.24	1.22	1.22	1.23	1.25
AF087973	1	0.97	0.9	0.8	0.82	0.88	1.01	1.11	1.1	1.1	1.14	1.17	1.13	1.02	0.97	0.93	0.9	0.91	0.87	0.84	0.84	0.88	0.92	1.05	1.05	1.05	1.05	1.11	1.14	1.1	1.12	1.13	1.16	1.19	1.18	1.16	1.11	1.12	1.13	1.12	1.12	1.13	1.13	1.05	1.11	1.13	1.11	1.1	1.09
AI001881	1	1.02	1.05	1.05	1.04	1.04	1.05	1.06	1.04	1.03	1.04	1.03	1.03	1.03	1.03	1.04	1.03	1.03	1.04	1.05	1.04	1.04	1.02	1.01	1	0.98	0.99	0.98	0.98	0.97	0.98	1	1.01	0.99	0.98	0.98	0.99	1	0.98	0.99	1	1.01	1.02	1.01	1.03	1.03	1.03	1.03	1.02
AI027434	1	1.07	1.07	1.01	0.93	0.9	0.8	0.78	0.74	0.71	0.7	0.7	0.71	0.71	0.7	0.7	0.7	0.7	0.7	0.7	0.72	0.72	0.7	0.69	0.68	0.67	0.69	0.7	0.69	0.69	0.68	0.66	0.67	0.67	0.67	0.67	0.67	0.65	0.62	0.64	0.65	0.62	0.62	0.61	0.61	0.61	0.61	0.61	0.63
AI083959	1	0.95	0.94	0.99	1.03	1.02	1	0.99	1.02	1.01	1	0.98	0.94	0.92	0.93	0.9	0.91	0.91	0.94	0.94	0.89	0.95	0.96	0.95	0.95	0.96	0.98	0.98	1.06	1.06	1.06	1.09	1.1	1.11	1.08	1.09	1.18	1.17	1.14	1.09	1.13	1.15	1.17	1.16	1.15	1.14	1.22	1.27	1.3
AI214364	1	1.06	1.05	1.02	0.96	0.92	0.89	0.86	0.78	0.78	0.77	0.78	0.79	0.78	0.78	0.78	0.77	0.72	0.74	0.74	0.75	0.77	0.79	0.82	0.82	0.81	0.83	0.82	0.81	0.8	0.81	0.73	0.75	0.75	0.75	0.77	0.79	0.79	0.79	0.8	0.8	0.86	0.89	0.93	0.97	0.99	1	1.03	1.04
AI217733	1	0.85	0.75	0.77	0.82	0.85	0.89	0.94	0.92	0.91	0.91	0.91	0.91	0.89	0.9	0.92	0.92	0.92	0.95	0.94	1.01	1.03	1.01	0.98	0.9	0.95	0.95	0.98	0.99	0.93	0.92	0.92	0.94	0.91	0.93	0.96	0.99	1.01	1.09	1.15	1.17	1.15	1.16	1.07	1.05	1.04	1.06	1.11	1.07
AI342698	1	0.93	0.93	0.95	0.99	0.96	0.99	1	1.03	1.06	1.03	1.02	1.02	1.03	0.99	0.98	0.95	0.91	0.91	0.89	0.86	0.89	0.86	0.85	0.83	0.81	0.79	0.78	0.78	0.78	0.8	0.86	0.86	0.85	0.9	0.91	0.89	0.85	0.89	0.95	0.98	1.01	1.04	1.07	1.11	1.11	1.1	1.23	1.2
AI671392	1	0.95	1.03	1.34	1.24	1.08	0.96	0.91	0.89	0.88	0.86	0.81	0.78	0.75	0.74	0.73	0.72	0.74	0.76	0.76	0.77	0.74	0.73	0.73	0.74	0.73	0.75	0.78	0.75	0.75	0.74	0.77	0.77	0.74	0.75	0.76	0.76	0.75	0.75	0.74	0.73	0.74	0.74	0.74	0.73	0.74	0.74	0.74	0.73
AI733141	1	1.02	0.975	0.925	0.87	0.85	0.84	0.835	0.825	0.825	0.815	0.81	0.81	0.805	0.795	0.795	0.785	0.785	0.785	0.78	0.785	0.795	0.79	0.79	0.795	0.805	0.805	0.8	0.795	0.805	0.805	0.82	0.845	0.84	0.885	0.89	0.875	0.885	0.88	0.91	0.905	0.89	0.89	0.885	0.86	0.865	0.885	0.905	0.915
AI792597	1	0.92	0.84	0.85	0.91	0.91	0.91	0.92	0.91	0.83	0.85	0.83	0.82	0.83	0.84	0.82	0.81	0.83	0.84	0.84	0.87	0.91	1.07	1.12	1.15	1.12	1.04	1.04	1.05	1.02	1.03	1.02	1.01	1.01	1.02	1.01	1.02	1	1.02	0.98	0.98	0.97	0.96	0.98	0.99	0.99	1.01	1.01	1.02
AI863545	1	1.01	0.95	0.9	0.83	0.81	0.81	0.87	0.93	0.98	0.97	0.95	0.86	0.79	0.75	0.74	0.79	0.82	0.81	0.81	0.79	0.77	0.73	0.7	0.69	0.67	0.67	0.67	0.69	0.65	0.64	0.62	0.61	0.62	0.66	0.69	0.67	0.67	0.67	0.7	0.69	0.67	0.66	0.67	0.7	0.7	0.73	0.73	0.74
AK022356	1	0.96	0.94	0.96	0.92	0.87	0.83	0.79	0.76	0.74	0.74	0.74	0.75	0.74	0.73	0.7	0.69	0.71	0.72	0.73	0.75	0.74	0.73	0.72	0.73	0.77	0.77	0.8	0.79	0.77	0.78	0.79	0.78	0.78	0.76	0.75	0.73	0.73	0.77	0.79	0.81	0.82	0.77	0.78	0.75	0.78	0.76	0.76	0.75
AK091021	1	0.87	0.78	0.76	0.75	0.85	0.91	0.88	0.87	0.93	0.95	0.96	1	0.99	0.96	0.94	0.94	0.96	0.97	0.95	0.97	1.02	1.04	1.03	1.02	1.1	1.02	1.04	1.03	0.9	0.89	0.94	0.96	0.94	0.92	0.92	0.9	0.93	0.92	0.95	0.96	0.97	0.97	0.92	0.9	0.91	0.92	0.93	0.95
AK091830	1	0.99	1	0.94	0.95	0.98	0.97	0.97	0.97	0.97	0.95	0.95	0.96	0.99	1.04	1.06	1.09	1.07	1.04	1.02	1	1.02	1.01	1.03	0.97	0.99	1.02	1.07	1.12	1.16	1.17	1.16	1.14	1.1	1.05	1.03	1.03	1.02	1.05	1.05	1.07	1.07	1.03	1	0.99	0.99	0.98	0.99	1.02
AK092541	1	1.02	1.05	1.06	1.08	1.08	1.07	1.04	1.01	1	0.98	0.98	0.97	0.97	0.97	0.96	0.98	0.97	0.98	0.97	0.96	0.95	0.94	0.94	0.95	0.97	0.99	1	0.99	0.98	0.96	0.94	1.02	1.01	1.01	1.01	0.99	0.99	1	1.01	1.01	1.01	1	0.99	0.99	0.99	0.98	0.99	0.99
AK094352	1	1	1.03	1.04	1	1.04	1.08	1.1	1.17	1.23	1.21	1.15	1.13	1.07	1.07	1.12	1.08	1.15	1.17	1.19	1.14	1.05	0.98	0.95	0.94	0.93	0.91	0.95	0.94	0.9	0.89	0.89	0.88	0.82	0.83	0.93	0.89	0.88	0.92	0.92	0.87	0.92	0.95	0.96	0.95	0.95	0.92	0.92	0.95
AK094903	1	1.09	1.15	1.11	1.05	1.01	1.01	1.03	1.02	1	0.98	0.96	0.97	0.96	0.96	0.95	0.93	0.92	0.93	0.93	0.92	0.93	0.93	0.93	0.94	0.88	0.89	0.92	0.96	0.97	0.96	0.95	0.95	0.96	0.94	0.93	0.93	0.94	0.94	0.96	1	1.04	0.91	0.89	0.88	0.84	0.81	0.83	0.84
AK097658	1	1.07	1.17	1.15	1.1	1.02	0.98	0.92	0.87	0.85	0.86	0.85	0.83	0.84	0.82	0.81	0.81	0.82	0.81	0.81	0.83	0.83	0.83	0.83	0.81	0.81	0.81	0.81	0.8	0.8	0.8	0.8	0.8	0.8	0.8	0.79	0.78	0.74	0.73	0.73	0.72	0.73	0.72	0.73	0.72	0.71	0.7	0.7	0.7
AK098170	1	1.04	1.09	1.12	1.16	1.2	1.21	1.17	1.15	1.14	1.12	1.09	1.07	1.06	1.08	1.1	1.05	1.1	1.11	1.17	1.2	1.2	1.21	1.23	1.24	1.21	1.27	1.24	1.26	1.29	1.3	1.28	1.27	1.27	1.27	1.26	1.26	1.2	1.23	1.31	1.34	1.35	1.5	1.42	1.41	1.39	1.38	1.31	1.28
AK098306	1	0.98	0.96	0.95	1	1	1.04	1.08	1.08	1.1	1.08	1.14	1.12	1.11	1.08	1.08	1.03	1	1	1	1.03	0.99	1.03	1.06	1	0.99	0.98	0.95	0.95	0.99	1.01	1.06	1.08	1.05	0.96	0.94	0.96	1.02	1.02	1.04	1.03	1.02	1.03	1.08	1.13	1.12	1.1	1.07	1.11
AK127500	1	1.01	1.03	1.06	1.17	1.2	1.01	1.02	1.05	1.07	0.97	1.05	0.95	0.96	1.02	1.05	1	0.96	0.95	0.98	1.01	1.1	1.13	1.09	1.16	1.17	1.24	1.21	1.17	1.06	1.05	1.02	0.99	0.9	0.93	1	0.97	0.92	0.89	0.9	0.9	0.88	0.87	0.87	0.89	0.98	1.11	1.14	1.15
AK127572	1	0.99	1.03	1.03	1.06	1.05	1.04	1.02	1.04	1.03	1.03	1.04	1.06	1.07	1.06	1.07	1.1	1.09	1.07	1.03	1.03	1.02	1.02	1.02	1.02	1.04	1.06	1.05	1.09	1.11	1.1	1.11	1.11	1.12	1.1	1.07	1.05	1.06	1.08	1.09	1.1	1.11	1.11	1.07	1.1	1.11	1.09	1.09	1.09
AK127877	1	0.89	0.83	0.86	0.91	0.94	0.95	0.97	1.01	1.07	1.13	1.19	1.23	1.2	1.15	1.05	1.03	1.05	1.06	1.04	0.93	0.93	0.9	0.89	0.8	0.85	0.98	1.05	1.11	1.12	1.24	1.16	1.07	1.19	1.2	1.25	1.24	1.17	1.1	1.05	1.07	1.18	1.24	1.3	1.27	1.26	1.13	0.94	0.93
AKAP8L	1	1.01	1.05	1.06	1.04	1.04	1.03	1.02	1	1	0.99	0.98	0.96	0.94	0.93	0.91	0.91	0.91	0.92	0.91	0.91	0.91	0.91	0.91	0.91	0.9	0.9	0.89	0.88	0.9	0.9	0.9	0.9	0.9	0.89	0.89	0.89	0.89	0.89	0.89	0.89	0.89	0.9	0.89	0.88	0.87	0.87	0.88	0.88
ALDH3B1	1	0.94	0.9	0.85	0.84	0.74	0.67	0.66	0.69	0.72	0.7	0.67	0.67	0.66	0.63	0.61	0.61	0.65	0.67	0.7	0.72	0.71	0.73	0.72	0.75	0.77	0.75	0.8	0.77	0.73	0.65	0.56	0.58	0.56	0.58	0.56	0.58	0.58	0.59	0.57	0.6	0.61	0.6	0.59	0.57	0.61	0.59	0.66	0.66
ANGPTL4	1	0.86	0.71	0.66	0.67	0.88	0.95	0.97	1	1.05	1.03	1.06	1.05	1.04	1.08	1.05	0.95	0.84	0.84	0.87	0.88	1.03	1.09	1.08	1.05	0.98	1.07	1.06	1.1	1.1	1.08	1.06	1.17	1.26	1.24	1.16	1.12	1.08	1.09	1.1	0.94	0.88	0.81	0.87	0.92	0.96	1.07	0.96	0.91
ANLN	1	1.04	1.09	1.1	1.07	1.06	1.05	1.04	1.01	0.98	0.97	0.94	0.91	0.89	0.9	0.93	0.95	0.93	0.93	0.9	0.9	0.9	0.88	0.86	0.85	0.82	0.8	0.79	0.78	0.77	0.76	0.76	0.76	0.77	0.77	0.77	0.77	0.78	0.77	0.77	0.77	0.77	0.76	0.75	0.76	0.76	0.74	0.74	0.74
ANX2	1	0.975	0.93	0.945	1.085	1.095	1.04	1.04	1.06	1.065	1.05	1.075	1.14	1.165	1.15	1.16	1.205	1.19	1.165	1.11	1.095	1.07	1.07	1.085	1.065	1.09	1.11	1.12	1.105	1.11	1.115	1.12	1.12	1.145	1.2	1.26	1.27	1.265	1.24	1.235	1.285	1.315	1.33	1.32	1.3	1.32	1.31	1.31	1.315
APLP2	1	1	1.02	1.06	1.09	1.09	1.1	1.12	1.12	1.09	1.08	1.08	1.04	1.05	1.03	1.02	1.02	0.98	0.97	0.97	0.96	0.98	0.94	0.93	0.92	0.92	0.93	0.92	0.92	0.96	1	1.05	1.06	1.07	1.04	0.98	1.02	1.04	1.04	1.05	1.06	1.07	1.08	1.1	1.14	1.16	1.11	1.09	1.06
ARHGAP17	1	0.95	0.94	0.95	0.96	0.96	0.98	1	0.99	1.01	1.03	1.06	1.08	1.08	1.08	1.1	1.07	1.04	1.04	1.03	1.03	1.02	1.04	1.04	1.05	1.05	1.1	1.11	1.1	1.09	1.1	1.1	1.11	1.17	1.21	1.24	1.28	1.24	1.21	1.21	1.2	1.19	1.18	1.18	1.17	1.15	1.13	1.12	1.13
ARHGAP18	1	1.03	1.07	1.06	1.06	1.05	1.04	1.04	1.05	1.07	1.08	1.08	1.08	1.08	1.08	1.08	1.07	1.07	1.08	1.08	1.07	1.07	1.06	1.06	1.06	1.06	1.06	1.05	1.05	1.05	1.05	1.05	1.05	1.05	1.05	1.05	1.06	1.08	1.07	1.07	1.07	1.07	1.07	1.06	1.05	1.04	1.04	1.04	1.05
ARID1B	1	1.07	1.14	1.15	1.14	1.12333	1.09	1.08	1.07667	1.07333	1.06333	1.05	1.04	1.03667	1.03333	1.03333	1.02333	1.01667	1.00333	0.99333	0.99333	1.00333	1.01	1.01	0.99667	0.99	0.98667	0.99	0.98333	0.98333	0.97667	0.97667	0.99	0.99333	0.99	0.98667	0.98333	0.97	0.96333	0.97667	0.98667	0.99	0.99	0.98667	0.98	0.97667	0.97333	0.97	0.98
ARL3	1	1.01	1.035	1.035	1.07	1.075	1.09	1.085	1.085	1.12	1.13	1.115	1.11	1.11	1.095	1.09	1.095	1.12	1.135	1.14	1.135	1.145	1.165	1.16	1.155	1.145	1.14	1.135	1.165	1.175	1.18	1.18	1.18	1.165	1.165	1.17	1.165	1.14	1.145	1.16	1.165	1.175	1.185	1.17	1.15	1.12	1.1	1.09	1.085
ARMC46	1	0.9	0.82	0.82	0.86	0.86	0.88	0.9	0.93	0.99	1.03	1.04	1.05	1.04	1.07	1.11	1.14	1.2	1.16	1.18	1.19	1.16	1.16	1.15	1.14	1.13	1.12	1.14	1.1	1.1	1.08	1.06	1.06	1.06	1.06	1.04	1.05	1.04	1.05	1.07	1.08	1.08	1.07	1.07	1.06	1.06	1.07	1.06	1.07
ARPC1A	1	1.01	1.04	1.03	1.07	1.12	1.17	1.16	1.15	1.1	1.09	1.12	1.15	1.14	1.16	1.18	1.23	1.21	1.21	1.21	1.23	1.25	1.23	1.23	1.24	1.23	1.21	1.22	1.26	1.27	1.26	1.24	1.21	1.2	1.24	1.23	1.2	1.21	1.25	1.26	1.21	1.17	1.17	1.18	1.17	1.17	1.17	1.19	1.22
ARPC2	1	0.89	0.91	0.96	0.89	0.91	0.93	0.9	0.83	0.81	0.81	0.83	0.79	0.79	0.92	0.93	0.97	0.97	1	1.02	1.01	1.02	1.14	1.26	1.25	1.17	1.2	1.17	1.22	1.2	1.18	1.15	1.14	1.06	1.06	1.04	1.02	1.05	1.08	1.03	0.98	0.94	0.93	1.05	1.18	1.3	1.23	1.08	1.05
ARPC3	1	1	1.02	1.06	1.08	1.07	1.09	1.09	1.06	1.06	1.07	1.03	1.06	1.08	1.12	1.12	1.13	1.14	1.15	1.14	1.14	1.16	1.17	1.19	1.18	1.12	1.09	1.08	1.07	1.07	1.09	1.08	1.05	1.04	1.03	1.03	1.01	1.01	1	1.01	1.04	1.04	1.05	1.05	1.05	1.06	1.05	1.05	1.06
ARPC4	1	0.95	0.91	0.9	0.92	0.97	0.97	0.98	1	1.01	1.02	1.01	1.03	1.03	1.05	1.04	1.05	1.04	1.04	1	1.02	1.03	1.03	1.05	1.07	1.04	1.06	1.11	1.11	1.14	1.17	1.17	1.17	1.14	1.14	1.16	1.18	1.21	1.25	1.23	1.24	1.2	1.21	1.21	1.24	1.22	1.21	1.17	1.17
ATAD2	1	0.95	0.91	0.9	0.93	0.98	1.02	1.05	1.08	1.09	1.09	1.09	1.07	1.06	1.04	1.05	1.05	1.06	1.06	1.05	1.03	1.04	1.05	1.06	1.08	1.08	1.08	1.08	1.04	1.02	1.01	1.01	1	1.03	1.03	1.03	1.02	1.01	1.01	1.02	1.02	1.01	1.01	1	1	1	1.01	1.02	1.01
ATF1	1	1.01	1.01	1	0.98	0.99	0.99	0.95	0.97	0.96	0.95	0.93	0.92	0.93	0.95	0.98	0.99	0.96	0.88	0.89	0.89	0.92	0.94	0.91	0.9	0.89	0.87	0.87	0.89	0.91	0.96	1.01	0.96	0.97	1.01	1.04	1.06	1.05	1	0.88	0.89	0.88	0.96	0.99	0.89	0.86	0.85	0.86	0.88
ATP5C1	1	0.87	0.83	0.84	0.86	0.89	0.95	0.99	1.03	1.02	0.99	0.97	0.97	0.96	0.96	0.96	0.94	0.93	0.94	0.95	0.97	0.94	0.92	0.9	0.91	0.93	1	0.94	0.94	0.83	0.79	0.8	0.83	0.85	0.9	0.9	0.87	0.82	0.86	0.88	0.96	0.93	0.9	0.88	0.87	0.83	0.86	0.98	0.98
ATP5J2	1	0.93	0.85	0.83	0.88	0.89	0.88	0.85	0.84	0.83	0.84	0.85	0.87	0.9	0.95	0.97	0.98	0.97	1.01	1.04	1.05	1.04	1.03	1.04	1.04	1.09	1.13	1.13	1.13	1.15	1.16	1.1	1.11	1.14	1.17	1.17	1.18	1.21	1.12	1.14	1.04	1.05	1.07	1.05	1.04	1.03	1.03	1.08	1.12
AV741821	1	0.87	0.84	0.87	0.75	0.68	0.77	0.91	0.92	1.03	1.07	1.07	1.06	1.13	1.13	1.16	1.19	1	0.99	1.06	1.13	1.1	1.18	1.19	1.14	1.17	1.2	1.17	1.06	1.04	1.07	1.18	1.26	1.12	1.08	1.19	1.13	1.08	1.01	0.96	0.9	0.89	0.85	0.87	0.85	0.85	0.92	0.92	0.92
AW241724	1	1.01	1.04	1.2	1.24	1.25	1.17	1.06	0.96	0.85	0.77	0.7	0.63	0.58	0.53	0.51	0.51	0.48	0.46	0.44	0.42	0.4	0.41	0.42	0.44	0.43	0.43	0.43	0.45	0.44	0.45	0.47	0.47	0.49	0.48	0.46	0.46	0.46	0.45	0.47	0.45	0.42	0.43	0.45	0.46	0.47	0.48	0.45	0.47
AW418496	1	1	0.97	0.91	0.86	0.8	0.79	0.78	0.72	0.72	0.71	0.71	0.71	0.71	0.74	0.73	0.7	0.69	0.68	0.65	0.67	0.63	0.63	0.68	0.68	0.69	0.69	0.68	0.69	0.72	0.72	0.72	0.72	0.72	0.71	0.67	0.66	0.65	0.64	0.63	0.64	0.68	0.71	0.72	0.72	0.74	0.74	0.7	0.68
AW662723	1	0.97	0.91	0.89	0.91	0.95	0.94	0.95	0.95	1.04	1.1	1.09	1.07	1.1	1.08	1.12	1.16	1.2	1.24	1.27	1.23	1.48	1.51	1.49	1.36	1.31	1.16	1.04	1.04	1.01	1.2	1.14	1.11	1.16	1.25	1.33	1.29	1.28	1.25	1.13	1.07	1.03	1	1	1.06	1.07	1.08	1.01	1.02
AX748230	1	0.91	0.855	0.87	0.84	0.865	0.91	0.955	0.915	0.94	0.97	0.935	0.9	0.88	0.865	0.86	0.86	0.84	0.84	0.845	0.825	0.825	0.805	0.785	0.795	0.82	0.82	0.83	0.89	0.91	0.865	0.885	0.875	0.9	0.95	0.955	1.005	1.005	1.02	1.025	0.945	0.88	0.88	0.87	0.865	0.865	0.85	0.855	0.86
AY054401	1	1.06	1.09	1.08	1.07	1.06	1.05	1.06	1.06	1.07	1.09	1.07	1.04	1	0.98	0.98	1.01	1.02	1.01	1.02	1.02	1.04	1.07	1.05	1.04	1.05	1.13	1.12	1.07	1.06	1.05	1.05	1.04	1.06	1.08	1.09	1.12	1.15	1.14	1.14	1.12	1.09	1.03	1.01	1	0.99	1	0.99	0.98
AY176665	1	1.04	1.09	1.07	1.02	0.99	0.95	0.93	0.93	0.91	0.9	0.92	0.91	0.91	0.9	0.9	0.9	0.89	0.87	0.89	0.89	0.92	0.91	0.91	0.91	0.93	0.92	0.94	0.94	0.95	0.95	0.94	0.93	0.93	0.92	0.91	0.9	0.91	0.92	0.91	0.91	0.89	0.89	0.88	0.89	0.88	0.87	0.86	0.85
AY480055	1	0.93	0.9	0.9	0.92	0.93	0.96	0.97	0.98	0.97	0.96	0.93	0.93	0.93	0.89	0.92	0.9	0.9	0.89	0.88	0.89	0.88	0.9	0.9	0.92	0.97	1.02	1.03	1.06	1.06	1.07	1.05	1.04	1.03	1.05	1.05	0.98	0.95	0.95	0.95	0.96	1	0.99	0.97	0.96	0.99	1.02	1.04	1.05
BACH	1	0.97	0.94	0.9	0.93	0.98	1	0.99	0.99	1.02	1.02	1.01	1.01	1.01	1.02	1.06	1.1	1.1	1.12	1.12	1.13	1.13	1.11	1.09	1.06	1.04	1.04	1.02	1.03	1.07	1.05	1.04	1.01	1.04	1.04	1.02	1.01	1	1.03	1.06	1.07	1.03	1.02	0.98	0.89	0.9	0.96	0.98	0.98
BAG1	1	1.055	1.105	1.095	0.96	0.92	0.92	0.92	0.92	0.925	0.925	0.935	0.935	0.95	0.965	0.955	0.945	0.915	0.905	0.925	0.92	0.945	0.925	0.92	0.905	0.91	0.915	0.915	0.9	0.875	0.87	0.84	0.83	0.835	0.84	0.83	0.825	0.845	0.865	0.86	0.865	0.885	0.925	1	0.985	0.92	0.87	0.875	0.86
BAG2	1	0.99667	1.03667	1.02667	1.02333	1.04667	1.07	1.08333	1.09667	1.08	1.08667	1.09667	1.14667	1.16667	1.17667	1.19333	1.22667	1.19333	1.18333	1.16	1.13	1.11667	1.15667	1.23333	1.23	1.18333	1.14	1.14333	1.13667	1.13	1.11	1.10333	1.10667	1.13333	1.16333	1.16667	1.15	1.11333	1.1	1.1	1.09333	1.09333	1.11667	1.11667	1.10667	1.09333	1.08333	1.09333	1.07667
BAIAP2	1	1.01	1	0.98	0.99	1	1	0.98	0.98	1	1	0.99	0.98	0.99	1	1.02	1.02	1.01	1.03	1.01	1	0.99	0.99	0.98	0.98	0.98	0.99	1	0.99	0.99	1.02	1.02	1	0.98	0.98	0.98	1	1	1.01	1.02	1.04	1.03	1.03	1.04	1.02	1	0.99	1	0.99
BAIAP2L1	1	1.09	1.18	1.14	1.12	1.11	1.08	1.06	1.05	1.03	1.03	1.04	1.05	1.04	1.03	1.02	1.02	1.01	1.01	1.02	1	1.01	1.01	1.01	1.01	0.97	0.98	0.93	0.91	0.92	0.91	0.93	0.95	0.95	0.94	0.93	0.91	0.91	0.9	0.9	0.89	0.86	0.86	0.86	0.86	0.87	0.86	0.85	0.86
BANK1	1	1	1	1.01	1.03	1.07	1.11	1.15	1.16	1.19	1.19	1.17	1.17	1.18	1.19	1.19	1.18	1.18	1.21	1.22	1.2	1.25	1.25	1.25	1.26	1.27	1.2	1.22	1.15	1.15	1.09	1.08	1.04	1.05	0.97	0.99	0.98	1	1	1.01	1.05	1.07	1.08	1.11	1.1	1.08	1.06	1.05	1.06
BAT4	1	0.98	0.99	1.06	1.09	1.07	1.07	1.04	1.06	1.09	1.15	1.28	1.17	1.15	1.21	1.26	1.33	1.35	1.33	1.34	1.32	1.31	1.29	1.3	1.41	1.39	1.39	1.33	1.3	1.28	1.28	1.26	1.16	1.11	1.08	1.08	1.08	1.08	1.09	1.02	1.06	1.08	1.03	1.03	1	1.03	1.17	1.2	1.21
BC005233	1	1.05	1.09	1.07	1.07	1.06	1.06	1.05	1.04	1.04	1.04	1.03	1.02	1.02	1.02	1.02	1.01	1	0.99	1	1	1	1	0.99	0.99	0.99	0.97	0.99	0.97	0.98	0.98	0.99	0.99	0.98	0.98	0.98	0.97	0.96	0.96	0.97	0.97	0.99	0.98	0.98	0.96	0.97	0.97	0.95	0.96
BC010922	1	1.06	1.12	1.12	1	0.87	0.87	0.86	0.96	1.09	1.16	1.17	1.16	1.13	1.13	1.15	1.23	1.2	1.2	1.14	1.07	0.99	1.04	1.07	0.93	0.94	0.97	0.81	0.74	0.73	0.75	0.82	0.8	0.8	0.82	0.76	0.65	0.63	0.69	0.84	0.79	0.79	0.93	1.09	1.15	1.15	1.06	1.04	1.06
BC013912	1	1	1.05	1.11	1.17	1.18	1.18	1.18	1.19	1.18	1.18	1.2	1.21	1.16	1.1	1.06	1.03	0.98	0.98	1.02	1.08	1.07	1.05	1.06	1.05	1.07	1.01	1.03	1.01	1.04	0.99	1.02	1	0.99	1.01	1.01	1.01	1.02	1.08	1.11	1.12	1.08	1.06	0.93	0.94	0.94	0.95	0.98	0.97
BC014506	1	1.05	1.1	1.08	1.03	1.01	1	1	0.99	0.99	0.99	0.98	0.98	0.99	0.99	0.98	0.97	0.97	0.96	0.94	0.94	0.93	0.95	0.95	0.96	0.95	0.95	0.94	0.94	0.95	0.95	0.95	0.96	0.97	0.97	0.97	0.95	0.95	0.94	0.94	0.93	0.92	0.93	0.92	0.91	0.91	0.91	0.91	0.92
BC015538	1	1.07	1.1	1.1	1.05	1.02	1	0.99	0.97	0.95	0.94	0.95	0.95	0.95	0.93	0.91	0.91	0.89	0.88	0.88	0.91	0.92	0.88	0.85	0.8	0.81	0.83	0.85	0.85	0.81	0.82	0.84	0.83	0.83	0.81	0.79	0.8	0.84	0.86	0.87	0.89	0.88	0.88	0.9	0.89	0.9	0.9	0.86	0.86
BC035377	1	1.04	1.1	1.21	1.16	1.09	1.06	1.03	1.03	1.05	1.07	1.06	1.06	1.06	1.07	1.08	1.08	1.09	1.09	1.09	1.08	1.08	1.07	1.06	1.06	1.06	1.05	1.08	1.08	1.06	1.07	1.07	1.06	1.07	1.11	1.14	1.14	1.14	1.12	1.13	1.13	1.13	1.13	1.1	1.07	1.05	1.03	1.01	1
BC039104	1	0.91	0.84	0.86667	0.89333	0.92	0.93667	0.94333	0.93333	0.93333	0.97667	0.99667	1.03	1.01333	1	1.01667	1.04	1.07	1.11667	1.10667	1.06667	1.04333	1.06667	1.02667	0.99667	0.99667	1.01667	1.03	1.07333	1.13333	1.13	1.12	1.04	1.02667	1.03333	1.02667	1.04	1.01667	1.01333	1.02	1.04667	1.06333	1.1	1.08667	1.05	1.04	1.04667	1.05	1.04667
BC040610	1	0.92	0.88	0.88	0.92	0.93	0.96	1.03	1.07	1.08	1.08	1.08	1.09	1.12	1.16	1.14	1.16	1.17	1.18	1.19	1.23	1.18	1.18	1.19	1.2	1.17	1.15	1.14	1.14	1.11	1.14	1.17	1.2	1.2	1.22	1.2	1.23	1.28	1.31	1.3	1.3	1.32	1.33	1.36	1.28	1.21	1.25	1.29	1.33
BC042060	1	0.9	0.84	0.9	0.91	0.89	0.91	1	0.98	0.98	1.01	1.03	1.04	1	1.07	1.07	1.09	1.06	1.06	1.09	1.07	1.04	1.06	1.17	1.21	1.11	1.13	1.2	1.21	1.19	1.21	1.26	1.27	1.2	1.17	1.11	1.06	1.13	1.14	1.19	1.16	1.03	1.07	1.1	1.15	1.25	1.24	1.17	1.2
BC042816	1	0.92	0.82	0.83	0.81	0.83	0.86	0.88	0.88	0.91	0.9	0.91	0.91	0.93	0.93	0.94	0.94	0.94	0.93	0.9	0.9	0.9	0.93	0.94	0.95	0.95	0.92	0.86	0.86	0.91	0.92	0.93	0.93	0.94	0.95	0.95	0.96	0.95	0.97	1.06	1.07	1.09	1.09	1.11	1.13	1.13	1.11	1.11	1.1
BC044741	1	1.11	1.09	1.02	0.97	0.99	0.98	0.97	0.97	0.96	0.95	0.93	0.92	0.92	0.92	0.9	0.89	0.9	0.91	0.91	0.94	0.93	0.94	0.94	0.91	0.91	0.92	0.94	0.91	0.89	0.89	0.87	0.89	0.9	0.9	0.9	0.9	0.91	0.91	0.93	0.91	0.9	0.9	0.88	0.89	0.91	0.87	0.86	0.87
BC048993	1	1.01	1.08	1.15	1.17	1.17	1.14	1.09	1.02	0.97	0.96	0.97	1.02	1.02	1.01	1.03	1.05	1.04	1.05	1.07	1.08	1.09	1.1	1.17	1.19	1.21	1.26	1.24	1.2	1.2	1.23	1.25	1.27	1.21	1.22	1.21	1.18	1.12	1.11	1.1	1.08	1.1	1.09	1.08	1.08	1.16	1.18	1.14	1.14
BE043072	1	0.91	0.83	0.83	0.93	0.96	1	1.04	1.03	1	0.98	0.96	0.94	0.96	0.99	0.97	0.97	0.95	0.99	1.01	1.05	1.12	1.11	1.09	1.08	1.06	0.98	1.01	1.03	1.04	1.05	1.07	1.08	1	1.03	1.07	1.08	1.07	1.06	1.05	1.04	1.03	1.06	1.03	1.08	1.12	1.15	1.15	1.18
BE785612	1	0.95	0.925	0.925	0.95	0.95	0.95	0.965	0.96	0.96	1	1.01	1.01	1.025	1.015	0.985	0.95	0.95	0.985	1	1.025	1.045	1.055	1.05	1.08	1.08	1.07	1.075	1.095	1.095	1.085	1.065	1.07	1.08	1.085	1.055	1.085	1.065	1.06	1.065	1.06	1.06	1.06	1.07	1.07	1.055	1.045	1.025	0.99
BF594738	1	1.075	1.075	0.995	0.89	0.84	0.82	0.8	0.79	0.795	0.795	0.765	0.79	0.83	0.825	0.77	0.76	0.755	0.75	0.73	0.735	0.73	0.745	0.735	0.73	0.72	0.715	0.72	0.715	0.715	0.71	0.71	0.71	0.725	0.715	0.745	0.74	0.735	0.725	0.735	0.735	0.735	0.74	0.745	0.72	0.725	0.725	0.75	0.76
BG181201	1	1.13	1.08	0.93	0.86	0.85	0.81	0.8	0.8	0.78	0.78	0.78	0.76	0.75	0.75	0.75	0.75	0.75	0.75	0.75	0.75	0.76	0.75	0.75	0.76	0.74	0.74	0.74	0.74	0.74	0.74	0.75	0.75	0.74	0.74	0.74	0.74	0.75	0.75	0.75	0.78	0.78	0.77	0.75	0.74	0.73	0.72	0.71	0.72
BG194390	1	1	1.01	1.03	1.05	1.09	1.11	1.11	1.1	1.09	1.08	1.06	1.05	1.06	1.07	1.08	1.11	1.1	1.09	1.08	1.09	1.15	1.15	1.15	1.12	1.1	1.12	1.14	1.14	1.15	1.13	1.15	1.15	1.18	1.14	1.16	1.17	1.19	1.2	1.18	1.18	1.15	1.16	1.15	1.14	1.13	1.12	1.09	1.1
BG203790	1	1.05	1.08	1.05	0.95	0.89	0.85	0.83	0.82	0.83	0.82	0.84	0.85	0.86	0.88	0.89	0.88	0.87	0.88	0.88	0.85	0.85	0.84	0.83	0.84	0.82	0.83	0.87	0.86	0.85	0.84	0.83	0.81	0.81	0.81	0.82	0.83	0.83	0.83	0.84	0.83	0.83	0.83	0.81	0.81	0.82	0.82	0.83	0.81
BG221753	1	0.99	1	1.02	1.04	1.06	1.07	1.07	1.1	1.11	1.1	1.1	1.09	1.07	1.07	1.08	1.09	1.07	1.05	1.05	1.05	1.04	1.03	1.04	1.05	1.06	1.08	1.05	1.04	1.05	1.05	1.08	1.07	1.07	1.07	1.07	1.1	1.1	1.1	1.11	1.11	1.12	1.14	1.16	1.16	1.14	1.13	1.12	1.11
BG425462	1	0.82	0.75	0.81	0.9	0.9	0.88	0.89	0.88	0.82	0.79	0.81	0.82	0.8	0.79	0.8	0.88	0.84	0.85	0.86	0.86	0.86	0.94	0.98	1	0.98	1	1.05	1.13	1.12	1.13	1.11	1.12	1.06	1.06	1.06	1.06	1.06	1.07	1.1	1.12	1.05	1.03	1.04	1.06	1.07	1.1	1.12	1.09
BI762388	1	1.02	1.04	1.02	0.98	0.97	0.98	0.96	0.91	0.88	0.89	0.87	0.87	0.86	0.86	0.83	0.82	0.82	0.84	0.83	0.83	0.83	0.84	0.84	0.85	0.87	0.85	0.83	0.8	0.8	0.79	0.81	0.82	0.83	0.83	0.83	0.83	0.83	0.84	0.83	0.83	0.84	0.85	0.85	0.87	0.87	0.89	0.87	0.86
BIN2	1	1.05	1.12	1.12	1.13	1.13	1.12	1.1	1.09	1.09	1.09	1.09	1.08	1.07	1.07	1.06	1.05	1.04	1.05	1.04	1.04	1.05	1.04	1.05	1.04	1.04	1.04	1.04	1.04	1.04	1.04	1.04	1.03	1.03	1.05	1.05	1.05	1.05	1.04	1.04	1.03	1.02	1.02	1.02	1.02	1.01	1.01	1	1
BM461531	1	1.075	1.085	1.045	1.015	0.995	0.98	0.975	0.965	0.955	0.95	0.93	0.915	0.91	0.905	0.89	0.885	0.875	0.87	0.87	0.865	0.865	0.855	0.855	0.845	0.84	0.84	0.83	0.83	0.83	0.815	0.82	0.83	0.835	0.83	0.835	0.835	0.845	0.82	0.83	0.825	0.85	0.855	0.855	0.85	0.865	0.865	0.87	0.865
BM681834	1	1.01	1.03	1.04	1.04	1.01	1.01	1.03	1.03	1.03	1	1.01	1.02	1.02	1.05	1.04	1.02	1.04	1.04	1.04	1.07	1.08	1.1	1.1	1.07	1.05	1.06	1.07	1.08	1.05	1.14	1.14	1.14	1.13	1.12	1.14	1.14	1.16	1.19	1.14	1.16	1.17	1.17	1.17	1.2	1.2	1.2	1.18	1.17
bogus	1	1.035	1.065	1.05	1.03	1.01	1	1	1.005	1.005	1.005	0.995	0.99	0.98	0.975	0.97	0.965	0.965	0.96	0.95	0.955	0.955	0.95	0.945	0.94	0.93	0.925	0.93	0.93	0.94	0.94	0.94	0.935	0.94	0.94	0.935	0.935	0.93	0.935	0.94	0.94	0.94	0.945	0.94	0.935	0.93	0.93	0.93	0.925
BTK	1	0.95	0.93	0.91	0.92	0.91	0.9	0.92	0.92	0.94	0.92	0.92	0.9	0.89	0.87	0.84	0.83	0.84	0.86	0.85	0.85	0.82	0.81	0.82	0.84	0.86	0.85	0.82	0.81	0.81	0.84	0.83	0.82	0.81	0.83	0.84	0.83	0.86	0.87	0.88	0.87	0.86	0.87	0.85	0.83	0.81	0.8	0.84	0.84
BU568189	1	1.02	1.04	1.02	0.99	0.99	1	1.05	1.08	1.1	1.1	1.11	1.16	1.17	1.16	1.14	1.12	1.11	1.11	1.09	1.11	1.11	1.11	1.08	1.07	1.12	1.11	1.14	1.15	1.13	1.07	1.06	1.07	1.08	1.08	1.07	1.07	1.05	1.06	1.05	1.04	1.06	1.06	1.08	1.04	1.01	0.98	0.98	1.02
BU607353	1	0.97	0.93	0.91	0.99	0.98	0.97	0.97	0.97	0.96	0.98	0.96	0.96	1.01	1.05	1.1	1.14	1.15	1.1	1.08	1.08	1.07	1.04	1.03	0.93	0.98	1.01	1.02	1.04	1.04	1.02	0.95	0.95	0.95	0.94	0.95	0.98	1	1	0.94	0.95	0.93	0.94	1.02	1.01	1.02	0.99	1	1.06
BU630466	1	1.01	1	1.04	1.07	1	0.99	1	1.04	1.08	1.02	1.1	1.15	1.17	1.14	1.19	1.25	1.24	1.18	1.15	1.18	1.14	1.12	1.1	1.12	1.17	1.2	1.23	1.24	1.21	1.12	1.11	1.08	1.08	1.1	1.16	1.21	1.21	1.22	1.17	1.15	1.13	1.11	1.12	1.09	1.1	1.16	1.25	1.19
BX089034	1	0.98	1.01	1.01	1.1	1.11	1.09	1.13	1.17	1.17	1.19	1.16	1.16	1.2	1.19	1.17	1.1	1.07	1.02	1.04	1.1	1.1	1.08	1.05	1.06	1.08	1.11	1.15	1.17	1.17	1.1	1.08	1.14	1.09	1.04	1	0.97	0.99	0.97	1	1.08	1.15	1.15	1.18	1.08	1.1	1.08	1.07	1.06
BX090666	1	0.86	0.7	0.7	0.77	0.84	0.88	0.9	0.9	0.86	0.89	0.9	0.95	0.98	0.99	0.95	0.95	0.97	1.01	1.08	1.14	1.11	1.06	1.01	0.98	1.04	1.04	1.04	1.05	1.07	1.1	1.11	1.15	1.15	1.15	1.15	1.15	1.18	1.21	1.22	1.23	1.21	1.18	1.17	1.16	1.16	1.13	1.13	1.16
BX100818	1	0.93	0.88	0.91	0.97	0.95	0.94	0.95	0.95	0.96	0.97	1.06	1.1	1.06	1.04	1	1	1.09	1.15	1.17	1.15	1.1	1.11	1.07	1.06	1.04	1.02	1	1.03	1.06	1.03	1.03	1.03	1.03	1.04	1.04	1.03	1.07	1.08	1.12	1.15	1.13	1.15	1.16	1.16	1.14	1.15	1.16	1.16
BX104605	1	0.925	0.825	0.815	0.84	0.875	0.9	0.9	0.905	0.93	0.94	0.93	0.945	0.95	0.95	0.94	0.95	0.96	0.945	0.945	0.95	0.955	0.95	0.96	0.94	0.915	0.925	0.94	0.94	0.935	0.94	0.92	0.935	0.93	0.93	0.95	0.955	0.96	0.995	0.97	0.995	0.95	0.95	0.955	0.95	0.97	0.985	1.03	1.045
BX537644	1	0.91	0.84	0.86	0.86	0.88	0.88	0.9	0.92	0.96	0.96	0.98	0.99	1.04	1.1	1.17	1.21	1.25	1.26	1.21	1.18	1.17	1.12	1.14	1.11	1.12	1.15	1.15	1.15	1.15	1.17	1.13	1.08	1.11	1.06	1.05	1.05	1.08	1.08	1.03	1.03	1.06	1.1	1.15	1.19	1.13	1.11	1.13	1.13
C12orf45	1	1.03	1.05	1.02	1.02	1.01	0.99	0.97	0.95	0.95	0.93	0.91	0.9	0.89	0.88	0.89	0.89	0.88	0.88	0.87	0.87	0.88	0.88	0.87	0.87	0.86	0.85	0.85	0.84	0.83	0.83	0.84	0.85	0.86	0.86	0.85	0.87	0.86	0.9	0.9	0.93	0.92	0.9	0.9	0.93	0.93	0.88	0.88	0.9
C14orf112	1	1.03	1.06	1.04	1.03	0.97	0.96	0.96	0.93	0.95	0.94	0.94	0.9	0.88	0.87	0.89	0.92	0.9	0.86	0.89	0.89	0.89	0.88	0.88	0.88	0.88	0.9	0.85	0.86	0.91	0.93	0.93	0.91	0.88	0.81	0.78	0.78	0.79	0.81	0.82	0.81	0.83	0.85	0.83	0.82	0.8	0.81	0.86	0.85
C14orf2	1	0.995	1.005	1.03	1.1	1.185	1.2	1.255	1.28	1.305	1.285	1.28	1.25	1.23	1.2	1.215	1.185	1.12	1.115	1.135	1.135	1.12	1.095	1.08	1.075	1.06	1.075	1.05	1.09	1.15	1.2	1.22	1.22	1.24	1.27	1.33	1.355	1.33	1.24	1.25	1.27	1.25	1.31	1.305	1.27	1.27	1.265	1.355	1.36
C19orf33	1	1.02	1.06	1.04	1.05	1.06	1.07	1.06	1.05	1.06	1.07	1.09	1.11	1.11	1.1	1.07	1.07	1.07	1.07	1.07	1.07	1.07	1.07	1.07	1.07	1.06	1.07	1.06	1.05	1.07	1.09	1.09	1.08	1.06	1.05	1.04	1.04	1.04	1.04	1.04	1.04	1.03	1.02	1.01	1	1	0.99	1.02	1.06
C19orf43	1	1.03	1.05	1.04	1.07	1.04	1.02	0.99	1	1.01	1.01	1.02	1.02	1	0.9	0.88	0.85	0.83	0.87	0.87	0.87	0.86	0.81	0.81	0.83	0.86	0.86	0.85	0.9	0.88	0.89	0.91	0.97	0.97	0.98	0.94	0.92	0.94	0.92	0.93	0.96	0.94	0.94	0.94	0.98	1.02	1.01	0.99	0.98
c19orf53	1	1.02	1.04	1.01	1.05	1.08	1.1	1.07	1.06	1.07	1.09	1.13	1.14	1.12	1.08	1.08	1.06	1.07	1.08	1.08	1.09	1.08	1.07	1.09	1.11	1.11	1.07	1.04	1.02	1.02	1	0.99	1.01	1.02	1.01	1.02	1.01	1.02	1.01	0.99	0.96	0.98	0.97	0.98	0.97	0.97	0.97	0.99	0.99
C1QBP	1	1.01	1.01	0.995	0.94	0.91	0.88	0.87	0.865	0.85	0.85	0.85	0.855	0.85	0.845	0.835	0.84	0.845	0.87	0.86	0.865	0.855	0.855	0.845	0.87	0.89	0.915	0.89	0.905	0.935	0.96	0.995	1.005	1.015	0.985	0.99	0.965	1	1.01	0.97	0.965	0.955	0.935	0.945	0.915	0.895	0.9	0.905	0.89
C20orf24	1	1.05	1.07	1.01	0.965	0.95	0.935	0.93	0.94	0.955	0.945	0.945	0.95	0.96	0.97	0.96	0.955	0.95	0.97	0.965	0.96	0.975	0.98	0.99	0.98	0.98	0.97	0.97	0.975	0.985	1	1.005	1	0.99	0.975	0.975	0.975	0.97	0.955	0.95	0.96	0.955	0.935	0.93	0.955	0.96	0.96	0.96	0.955
C22orf16	1	0.88	0.81	0.83	0.88	0.86	0.87	0.86	0.88	0.89	0.92	0.92	1.01	1.11	1.18	1.15	1.15	1.09	1.13	1.18	1.21	1.16	1.15	1.13	1.14	1.14	1.12	0.99	0.99	1.01	0.99	0.93	0.99	0.99	0.98	0.98	0.98	1	1.01	1.03	1.06	1.05	1.01	1	1	1.03	1.03	1.04	1.07
C2orf25	1	1.01	1.06	1.08	1.14	1.16	1.18	1.16	1.13	1.07	1.05	1.01	1	1.01	1.03	1.04	1.03	1.03	1.03	1.04	1.05	1.03	1.01	1.02	1.03	1.02	0.97	0.96	0.96	0.99	0.99	0.97	0.99	0.99	0.99	1	1.02	1.05	1.05	1.04	1.03	1.03	1.01	1.02	1.03	1.04	1.06	1.08	1.08
C3ORF19	1	1.085	1.105	1.11	1.11	1.065	1.005	0.96	0.925	0.915	0.925	0.925	0.905	0.9	0.89	0.89	0.88	0.865	0.87	0.865	0.87	0.865	0.86	0.87	0.85	0.85	0.86	0.88	0.845	0.825	0.815	0.82	0.815	0.825	0.81	0.785	0.78	0.8	0.81	0.815	0.815	0.815	0.815	0.825	0.81	0.815	0.825	0.835	0.8
C6orf106	1	1.06	1.11	1.13	1.13	1.18	1.18	1.17	1.16	1.15	1.09	1.1	1.09	1.2	1.12	1.11	1.1	1.1	1.08	1.08	1.07	1.07	1.05	1.06	1.05	1.03	1.03	1.03	1.04	1.02	1.02	1.08	1.03	1.03	1.01	0.99	0.96	0.96	0.96	0.98	1.01	1.01	1.01	0.98	0.96	0.96	0.97	0.97	0.97
C7orf11	1	1.08	1.13	1.1	1.1	1.07	1.09	1.09	1.09	1.08	1.07	1.06	1.02	1.01	1	1	0.97	0.97	0.97	0.98	0.98	0.98	0.96	0.95	0.94	0.94	0.92	0.92	0.94	0.93	0.91	0.9	0.91	0.91	0.9	0.9	0.9	0.91	0.9	0.9	0.89	0.88	0.88	0.85	0.87	0.89	0.89	0.89	0.9
C8orf53	1	1.01	1.05	1.06	1.09	1.08	1.08	1.06	1.05	1.07	1.1	1.11	1.11	1.1	1.08	1.08	1.07	1.06	1.06	1.03	1.02	1.02	1.01	1	0.99	0.99	1	1.02	1.03	1.03	1.05	1.07	1.07	1.06	1.06	1.08	1.09	1.06	1.07	1.1	1.12	1.13	1.14	1.15	1.15	1.15	1.16	1.16	1.15
C9orf40	1	1	0.98	0.97	1.01	1.01	1	0.97	0.99	0.97	0.97	0.96	0.93	0.94	0.96	0.92	0.93	0.95	0.91	0.89	0.93	0.97	0.97	1	1	1.02	1	0.99	0.99	0.97	0.97	0.99	1.02	1.04	1.09	1.09	1.09	1.1	1.08	1.05	1.09	1.07	1.09	1.11	1.08	1.01	0.98	0.98	0.99
CA430002	1	1	1.02	1.03	0.96	0.89	0.81	0.74	0.75	0.74	0.75	0.76	0.77	0.79	0.78	0.76	0.76	0.78	0.79	0.79	0.79	0.8	0.79	0.79	0.77	0.77	0.75	0.78	0.77	0.74	0.72	0.73	0.72	0.78	0.77	0.77	0.77	0.78	0.79	0.78	0.77	0.77	0.78	0.77	0.75	0.74	0.75	0.77	0.78
CACYBP	1	0.9	0.89	1.02	1.06	1.08	1.09	1.14	1.21	1.2	1.15	1.14	1.22	1.25	1.23	1.2	1.26	1.26	1.27	1.27	1.21	1.22	1.17	1.18	1.27	1.3	1.35	1.34	1.37	1.49	1.48	1.43	1.27	1.25	1.27	1.32	1.36	1.33	1.39	1.32	1.28	1.34	1.35	1.3	1.29	1.27	1.37	1.43	1.44
CALD1	1	1.06	1.03	1.06	1.16	1.25	1.27	1.05	1.04	1.06	1.09	1.07	1	1.02	0.98	0.99	1.01	1.02	0.99	0.99	1	1.02	1.08	1.08	1.06	1.13	1.14	1.13	1.15	1.18	1.2	1.25	1.24	1.24	1.23	1.22	1.26	1.3	1.23	1.23	1.26	1.29	1.21	1.1	1.08	1.06	1.06	1.07	1.05
CALM1	1	0.956	0.912	0.934	0.978	1.01	1.044	1.096	1.132	1.138	1.144	1.156	1.144	1.098	1.096	1.076	1.076	1.094	1.11	1.14	1.162	1.162	1.12	1.12	1.128	1.142	1.146	1.148	1.132	1.11	1.086	1.056	1.044	1.044	1.03	1.032	1.054	1.072	1.048	1.02	1.034	1.062	1.074	1.078	1.074	1.056	1.04	1.022	1.028
CALM2	1	1	1.08	1.12	1.09	1.13	1.15	1.27	1.29	1.28	1.24	1.17	1.09	1.11	1.05	1.06	1.06	1.08	1.01	0.99	0.97	1.01	1.02	1.05	1.05	1.03	1.06	1.04	1.12	1.1	1.12	1.13	1.2	1.22	1.23	1.21	1.13	1.07	1.09	1.12	1.12	1.16	1.12	1.16	1.09	1.14	1.17	1.13	1.15
CAST	1	0.96	0.95	0.97	1.02	1.04	1.04	1.04	1.03	1.04	1.05	1.04	1.03	1.01	1	1.01	1.01	1.02	1.03	1.02	1.01	1.02	1.03	1.04	1.07	1.07	1.06	1.09	1.12	1.11	1.08	1.06	1.08	1.08	1.05	1.05	1.08	1.08	1.05	1.05	1.07	1.12	1.13	1.11	1.1	1.09	1.09	1.08	1.07
CAV1	1	1.045	1.07	1.065	1.06	1.045	1.045	1.04	1.05	1.055	1.06	1.055	1.05	1.04	1.045	1.035	1.04	1.04	1.03	1.02	1.005	1	1.005	1	0.99	0.99	1	0.995	0.995	0.99	1	1.005	1.015	1.02	1.015	1.02	1.02	1.025	1.02	1.015	1.02	1.025	1.02	1.025	1.025	1.01	0.995	0.99	0.98
CB045860	1	1.02	1.05	1.07	1.1	1.13	1.15	1.14	1.16	1.21	1.28	1.31	1.35	1.34	1.27	1.19	1.14	1.11	1.11	1.1	1.14	1.18	1.21	1.24	1.21	1.16	1.11	1.11	1.14	1.2	1.23	1.21	1.22	1.2	1.17	1.14	1.2	1.21	1.19	1.13	1.04	1.01	1.02	1.04	1.04	1.03	1.03	1.08	1.11
CB155900	1	0.98	0.97	0.98	0.98	1	0.96	0.95	0.93	0.92	0.94	0.99	0.97	0.97	0.95	0.96	0.95	1.04	1.06	1.05	1.04	1.05	1.03	1.02	1.01	1.02	1.02	1.01	1.01	1.02	0.99	0.97	0.95	0.95	0.9	0.92	0.96	1	1.06	1.12	1.09	1.05	1.01	1.01	1.03	1.02	1.02	1.03	1.03
CCDC12	1	1.1	1.16	1.14	1.15	1.15	1.13	1.11	1.08	1.05	1.04	1.04	1.04	1.02	1.01	1	0.95	0.95	0.96	0.94	0.94	0.95	0.95	0.95	0.94	0.94	0.94	0.94	0.94	0.96	0.95	0.92	0.92	0.92	0.93	0.93	0.92	0.9	0.89	0.86	0.85	0.85	0.85	0.85	0.86	0.85	0.83	0.87	0.86
CCDC23	1	0.9	0.85	0.88	0.9	0.91	0.94	0.97	0.99	1.02	1.04	1.05	1.05	1.05	1.04	1.03	1.04	1.03	1.04	1.05	1.08	1.09	1.1	1.1	1.11	1.11	1.11	1.11	1.11	1.12	1.12	1.09	1.1	1.11	1.1	1.09	1.12	1.11	1.11	1.13	1.14	1.15	1.15	1.15	1.16	1.15	1.17	1.19	1.21
CCDC50	1	0.96	0.88	0.84	0.87	0.91	0.99	1.05	1.07	1.08	1.1	1.07	1.08	1.1	1.1	1.1	1.1	1.13	1.16	1.17	1.16	1.13	1.12	1.1	1.12	1.13	1.15	1.13	1.15	1.15	1.14	1.18	1.17	1.17	1.18	1.15	1.15	1.13	1.13	1.13	1.14	1.17	1.19	1.19	1.18	1.18	1.19	1.18	1.18
CCDC72	1	1.04	1.12	1.13	1.15	1.16	1.15	1.13	1.11	1.07	1.08	1.12	1.15	1.18	1.2	1.19	1.19	1.2	1.15	1.15	1.17	1.2	1.24	1.26	1.23	1.22	1.21	1.23	1.21	1.33	1.37	1.37	1.35	1.35	1.32	1.34	1.37	1.38	1.39	1.39	1.39	1.37	1.31	1.29	1.25	1.22	1.21	1.24	1.24
CCDC74A	1	1.07	1.04	0.89	0.74	0.68	0.67	0.68	0.67	0.67	0.66	0.68	0.67	0.66	0.67	0.66	0.68	0.69	0.69	0.67	0.67	0.66	0.66	0.63	0.62	0.62	0.62	0.61	0.62	0.6	0.59	0.6	0.61	0.62	0.61	0.62	0.62	0.64	0.64	0.63	0.6	0.6	0.61	0.62	0.63	0.62	0.61	0.61	0.61
CD164	1	1.03	1.08	1.06	1.05	1.07	1.12	1.15	1.18	1.16	1.15	1.13	1.12	1.1	1.07	1.06	1.07	1.05	1.04	1.03	1.03	1.04	1.04	1.05	1.03	1.03	1.03	1.04	1.03	1.05	1.08	1.09	1.06	1.06	1.07	1.06	1.05	1.02	0.98	0.96	0.95	0.95	0.95	0.96	0.96	0.96	0.95	0.95	0.93
CD2AP	1	0.95	0.86	0.86	0.88	0.95	1.02	1.05	1.07	1.07	1.07	1.06	1.05	1.04	1.05	1.05	1.05	1.03	1.03	1.04	1.03	1.02	1.02	1.03	1.03	1.05	1.06	1.04	1.05	1.06	1.04	1.06	1.05	1.05	1.05	1.05	1.06	1.05	1.04	1.05	1.04	1.05	1.06	1.05	1.06	1.08	1.07	1.07	1.07
CD44	1	1.02333	1.01333	0.97333	0.95667	0.93667	0.92333	0.92333	0.94333	0.95667	0.92	0.91667	0.91333	0.94	0.95	0.95667	0.96667	0.97667	0.97	0.99333	0.99	1	0.99667	1	0.98667	1.01	1.03333	1.04333	1.06333	1.03333	1.02333	0.98667	0.94667	0.95	0.94	0.92333	0.91667	0.89667	0.89333	0.85	0.84	0.83	0.80667	0.79667	0.80667	0.82	0.82333	0.82667	0.82667
CD519352	1	0.85	0.73	0.76	0.73	0.8	0.78	0.79	0.76	0.75	0.73	0.7	0.72	0.79	0.83	0.88	1.03	1.05	1.01	1.05	1.1	1.18	1.19	1.21	1.23	1.24	1.16	1.1	1.12	1.16	1.24	1	1.01	1	0.87	0.9	0.9	0.93	1.09	1.1	1.1	1.12	1.14	1.15	1.48	1.42	1.45	1.41	1.42
CD63	1	0.98	1.03	1.01	0.98	0.95	0.93	0.94	0.93	0.91	0.91	0.91	0.88	0.86	0.84	0.86	0.86	0.86	0.8	0.79	0.83	0.84	0.85	0.84	0.8	0.81	0.79	0.8	0.78	0.76	0.75	0.76	0.76	0.76	0.75	0.74	0.77	0.81	0.82	0.83	0.83	0.82	0.79	0.8	0.82	0.84	0.83	0.81	0.8
CD641745	1	0.97	0.95	1.02	1.13	1.17	1.15	1.26	1.31	1.32	1.36	1.4	1.41	1.41	1.4	1.4	1.36	1.36	1.35	1.32	1.27	1.18	1.18	1.2	1.21	1.2	1.16	1.09	1.11	1.11	1.11	1.17	1.11	1.11	1.12	1.17	1.14	1.14	1.14	1.15	1.17	1.15	1.17	1.18	1.18	1.19	1.2	1.21	1.2
CD642856	1	1.17	1.21	1.17	1.06	0.95	0.91	0.87	0.84	0.85	0.82	0.81	0.81	0.81	0.8	0.79	0.79	0.81	0.81	0.81	0.79	0.8	0.8	0.81	0.81	0.8	0.79	0.8	0.81	0.81	0.81	0.81	0.82	0.81	0.8	0.78	0.76	0.77	0.76	0.76	0.75	0.75	0.76	0.76	0.76	0.76	0.74	0.74	0.74
CD692919	1	1.04	1.09	1.1	1.11	1.08	1.07	1.03	1.01	1	1	1	0.97	0.98	0.98	0.99	0.99	0.97	0.94	0.95	0.98	0.97	0.99	1.01	1.06	1.05	1.04	1.03	1.03	1.03	1.02	1.01	1.02	1.04	1.07	1.08	1.02	1.05	1.07	1.06	1.09	1.1	1.08	1.07	1.06	1.01	1.01	1.01	1.01
CDADC1	1	0.92	0.87	0.82	0.85	0.91	0.94	0.9	0.89	0.8	0.79	0.78	0.8	0.82	0.82	0.81	0.81	0.8	0.85	0.83	0.89	0.91	0.85	0.85	0.86	0.86	0.86	0.88	0.88	0.89	0.91	0.86	0.93	0.91	0.93	0.93	0.87	0.9	0.91	0.92	0.89	0.9	0.87	0.88	0.9	0.95	0.97	0.98	1
CDKN3	1	1.06	1.11	1.09	1.14	1.15	1.17	1.18	1.21	1.27	1.31	1.3	1.31	1.29	1.32	1.35	1.34	1.32	1.28	1.16	1.16	1.17	1.16	1.17	1.18	1.16	1.14	1.13	1.12	1.12	1.13	1.15	1.16	1.14	1.17	1.2	1.21	1.22	1.15	1.14	1.1	1.11	1.1	1.08	1.08	1.09	1.06	1.06	1.06
CGI-94	1	0.95	1.09	1.09	1.11	1.04	0.97	0.96	0.97	0.99	1.03	1.06	1.05	1.03	1.05	1.08	1.05	0.98	0.94	0.94	0.95	0.95	0.95	0.96	0.95	0.97	0.91	0.92	0.87	0.91	0.85	0.81	0.88	0.89	1.02	0.99	0.96	0.93	0.91	1.08	1.12	1.12	1.22	1.28	1.28	1.23	1.16	1.14	1.11
CHCHD2	1	0.95	0.9	0.86	0.85	0.89	0.94	0.98	1.01	1.06	1.11	1.16	1.18	1.18	1.21	1.23	1.25	1.23	1.22	1.24	1.25	1.26	1.26	1.31	1.31	1.32	1.34	1.33	1.34	1.35	1.35	1.36	1.33	1.33	1.3	1.3	1.29	1.26	1.24	1.25	1.26	1.27	1.3	1.29	1.29	1.3	1.32	1.33	1.33
CHORDC1	1	1.03	1.06	1.09	1.09	1.1	1.1	1.15	1.17	1.16	1.17	1.22	1.22	1.21	1.16	1.15	1.3	1.41	1.47	1.47	1.48	1.43	1.5	1.5	1.59	1.57	1.48	1.53	1.54	1.52	1.5	1.54	1.6	1.55	1.5	1.48	1.55	1.54	1.49	1.52	1.41	1.46	1.33	1.32	1.16	1.07	1.12	1.17	1.2
CINP	1	1.07	1.09	1.06	1.01	0.94	0.91	0.89	0.87	0.86	0.84	0.84	0.83	0.83	0.83	0.82	0.8	0.79	0.8	0.79	0.79	0.78	0.79	0.79	0.78	0.78	0.78	0.77	0.77	0.78	0.78	0.79	0.78	0.77	0.76	0.75	0.75	0.76	0.77	0.77	0.77	0.77	0.78	0.77	0.76	0.76	0.76	0.77	0.77
CIRBP	1	1.04	1.04	1.05	1.06	1.05	1.04	1.09	1.05	1.03	1	0.95	0.88	0.88	0.87	0.85	0.76	0.73	0.73	0.74	0.76	0.79	0.82	0.84	0.84	0.88	0.82	0.76	0.74	0.77	0.73	0.73	0.79	0.79	0.79	0.77	0.77	0.63	0.6	0.6	0.64	0.68	0.68	0.67	0.66	0.68	0.69	0.69	0.69
CIRH1A	1	1.05	1.06	0.99	0.94	0.89	0.87	0.87	0.87	0.88	0.88	0.86	0.85	0.85	0.85	0.85	0.85	0.84	0.84	0.85	0.86	0.85	0.85	0.85	0.84	0.84	0.85	0.86	0.85	0.84	0.84	0.84	0.84	0.84	0.83	0.84	0.83	0.83	0.84	0.84	0.83	0.82	0.81	0.81	0.81	0.8	0.78	0.77	0.77
CK126027	1	1.06	1.14	1.23	1.27	1.23	1.22	1.22	1.23	1.29	1.32	1.36	1.4	1.44	1.44	1.48	1.44	1.5	1.49	1.52	1.43	1.44	1.41	1.38	1.24	1.24	1.22	1.25	1.27	1.29	1.25	1.24	1.25	1.27	1.27	1.22	1.24	1.29	1.29	1.31	1.3	1.22	1.23	1.11	1.14	1.18	1.18	1.17	1.13
CKS2	1	1.02	1.08	1.11	1.155	1.17	1.195	1.215	1.22	1.215	1.27	1.29	1.275	1.24	1.235	1.235	1.235	1.24	1.255	1.22	1.23	1.22	1.205	1.195	1.2	1.2	1.195	1.175	1.18	1.185	1.19	1.17	1.145	1.145	1.145	1.125	1.12	1.115	1.115	1.095	1.105	1.09	1.12	1.11	1.09	1.13	1.135	1.115	1.105
CLCN3	1	1	1.01	1.09	1.09	1.01	0.91	0.9	0.81	0.86	0.86	0.85	0.82	0.81	0.78	0.78	0.77	0.77	0.77	0.75	0.75	0.75	0.75	0.76	0.76	0.77	0.77	0.78	0.78	0.77	0.78	0.77	0.73	0.73	0.75	0.71	0.7	0.73	0.71	0.7	0.71	0.74	0.75	0.76	0.78	0.77	0.76	0.76	0.77
CLIC4	1	1.03	1.1	1.12	1.12	1.12	1.11	1.07	1.07	1.08	1.09	1.08	1.08	1.06	1.06	1.07	1.05	1.05	1.05	1.06	1.06	1.06	1.07	1.07	1.05	1.03	1.04	1.03	1.01	1	1.02	1.02	1.02	1	0.98	0.97	0.97	0.97	0.99	0.99	1.01	1.02	1.02	1	0.99	1.01	1.04	1.08	1.07
CLINT1	1	1.06	0.95	0.9	0.87	0.82	0.87	0.86	1.02	1.05	1.03	0.9	0.79	0.94	0.93	0.93	0.89	0.87	0.9	0.98	1.1	1.02	0.96	0.95	1.12	1.04	0.95	1.01	1.03	1	1.01	1.09	1.01	0.98	1.07	1.03	0.99	0.87	0.85	0.84	0.85	0.93	0.89	0.89	1.04	1.08	1.25	1.25	1.24
CLPTM1	1	1.05	1.1	1.08	1.07	1.05	1.03	1.04	1.03	1.03	1.01	0.99	0.97	0.97	0.98	0.97	0.97	0.97	0.96	0.96	0.97	0.97	0.95	0.95	0.95	0.96	0.97	0.98	0.99	0.99	1	0.98	0.97	0.97	0.97	0.96	0.95	0.96	0.94	0.94	0.93	0.93	0.94	0.95	0.95	0.95	0.95	0.95	0.95
CNN3	1	0.95	0.87	0.87	0.88	0.88	0.89	0.91	0.9	0.94	0.97	1.04	1.05	1.07	1.15	1.15	1.15	1.15	1.16	1.2	1.2	1.21	1.21	1.18	1.16	1.17	1.18	1.19	1.25	1.26	1.29	1.24	1.2	1.18	1.14	1.17	1.17	1.17	1.16	1.16	1.14	1.15	1.14	1.12	1.09	1.04	0.99	1	1.05
COPS6	1	0.98	0.965	0.93	0.85	0.78	0.75	0.715	0.73	0.735	0.695	0.655	0.615	0.615	0.665	0.69	0.675	0.66	0.655	0.625	0.61	0.64	0.67	0.685	0.705	0.705	0.67	0.67	0.695	0.715	0.74	0.75	0.775	0.745	0.77	0.75	0.735	0.75	0.755	0.775	0.74	0.725	0.715	0.73	0.695	0.715	0.765	0.77	0.815
COTL1	1	0.97	1.02	1.04	1.07	1.1	1.12	1.18	1.2	1.19	1.17	1.16	1.17	1.17	1.16	1.16	1.16	1.15	1.14	1.15	1.13	1.12	1.15	1.15	1.13	1.13	1.15	1.13	1.13	1.12	1.14	1.13	1.26	1.25	1.25	1.28	1.22	1.18	1.23	1.3	1.29	1.38	1.33	1.26	1.24	1.12	1.21	1.22	1.09
COX17	1	1.01	1.03	1.07	1.05	1.06	1.07	1.09	1.14	1.14	1.13	1.12	1.09	1.06	1.04	1.04	1.05	1.05	1.08	1.08	1.08	1.17	1.17	1.19	1.2	1.18	1.17	1.18	1.17	1.15	1.15	1.16	1.14	1.12	1.11	1.1	1.11	1.1	1.1	1.08	1.07	1.04	1.02	1.02	1.01	1.04	1.07	1.04	1.02
COX7C	1	1.02667	0.99	1.03	0.99667	0.97	0.96	0.92	0.89	0.87667	0.85	0.82	0.81667	0.78667	0.78333	0.76667	0.76667	0.75667	0.75	0.76333	0.74667	0.73	0.74	0.73667	0.75667	0.76667	0.77333	0.77	0.78333	0.76667	0.80333	0.78	0.77	0.77667	0.77	0.76	0.74667	0.76	0.75	0.70667	0.70333	0.7	0.69667	0.70333	0.71667	0.72	0.71667	0.7	0.71333
CR593740	1	0.97	0.98	1.03	1.04	1.02	1.01	1	1.03	1.08	1.12	1.17	1.27	1.3	1.27	1.2	1.2	1.19	1.3	1.24	1.26	1.26	1.26	1.21	1.24	1.26	1.3	1.23	1.24	1.13	1.1	1.21	1.12	1.02	1.1	1.1	1.19	1.12	1.09	1.16	1.17	1.17	1.14	1.11	1.11	1.18	1.18	1.16	1.16
CR623475	1	0.94	0.93	0.95	0.94	0.97	0.97	1.02	1.03	1.06	1.12	1.11	1.1	1.09	1.07	1.06	1.04	1.03	1.02	1	0.98	0.94	0.94	0.97	0.99	0.98	0.97	1.02	0.98	0.96	0.99	0.96	0.98	0.99	1.01	1.03	0.96	0.91	0.91	0.9	0.97	1.01	1.01	1.06	1.08	1.1	1.17	1.21	1.27
CR627148	1	0.83	0.72	0.75	0.72	0.73	0.73	0.74	0.78	0.81	0.81	0.9	0.9	0.89	0.87	0.9	0.92	0.94	0.93	1.04	1.01	1.06	1.09	1.13	1.15	1.13	1.1	1.03	1.07	1.1	1.2	1.19	1.2	1.21	1.24	1.29	1.29	1.3	1.34	1.45	1.54	1.5	1.48	1.47	1.47	1.49	1.44	1.37	1.33
CR737784	1	0.91	0.81	0.84	0.84	0.86	0.86	0.91	0.99	1.07	1.07	1.07	0.99	0.97	0.97	1.14	1.25	1.29	1.29	1.34	1.37	1.17	1.12	1.07	0.99	0.99	0.93	0.88	0.78	0.81	0.9	0.95	0.97	1.05	1.09	1.11	1.13	1.14	1.09	1.05	1.02	1.08	1.17	1.28	1.3	1.34	1.43	1.41	1.38
CR994463	1	1.09	1.14	1.09	1.05	1.02	0.99	0.94	0.95	0.98	0.93	0.95	1.1	1.14	1.12	1.02	0.94	0.99	1	0.96	0.93	0.97	0.99	0.97	0.94	0.94	0.95	0.96	0.94	0.9	0.91	0.92	0.88	0.89	0.91	0.95	1.02	1	0.98	0.93	0.93	0.95	1.03	1.05	1.05	1.04	1.04	1.08	1.08
CRKL	1	1.03	1.02	1.03	1.07	1.08	1.06	1.07	1.07	1.05	1.01	1	1.01	0.98	0.98	0.96	0.94	0.94	0.98	1.01	1.03	1.05	1.08	1.09	1.07	1.07	1.06	1.04	1.04	1.05	1.04	1.05	1.06	1.05	1.04	1.07	1.05	1.03	1.01	1.01	1.02	1.19	1.21	1.24	1.2	1.23	1.2	1.19	1.15
DA336829	1	0.99	1.04	1.09	1.09	1.03	0.98	0.95	0.91	0.89	0.87	0.9	0.91	0.91	0.91	0.88	0.87	0.86	0.85	0.85	0.84	0.84	0.82	0.83	0.86	0.86	0.86	0.86	0.88	0.88	0.86	0.84	0.83	0.83	0.85	0.85	0.86	0.85	0.85	0.8	0.79	0.81	0.81	0.8	0.8	0.81	0.79	0.79	0.81
DA69782	1	1.01	0.99	0.98	0.97	0.97	0.99	1	1.02	1.01	1	1.01	1.01	1.02	1.02	1.02	1.01	1.01	1.01	1.01	0.99	1	1	0.99	0.97	0.96	0.97	0.97	0.96	0.96	0.95	0.96	0.96	0.97	0.97	0.98	0.96	0.95	0.93	0.93	0.93	0.97	1	0.99	0.95	0.96	0.99	0.99	0.99
DA697821	1	1.03	1.06	1.11	1.1	1.08	1.06	1.06	1.14	1.13	1.13	1.15	1.14	1.14	1.16	1.16	1.14	1.11	1.08	1.07	1.08	1.08	1.05	1.07	1.07	1.08	1.04	1.03	1.01	1.03	1.03	1.04	1.04	1	1	1	1.01	1.03	1.03	1.02	1.01	0.99	0.99	1.03	1.03	1.02	1.01	1.03	1.04
DAD1	1	1.09	1.12	1.08	1.01	0.99	0.96	0.97	0.96	0.96	0.95	0.95	0.95	0.95	0.95	0.94	0.94	0.93	0.92	0.92	0.92	0.92	0.92	0.94	0.92	0.91	0.91	0.9	0.89	0.89	0.89	0.89	0.88	0.88	0.88	0.88	0.87	0.88	0.88	0.89	0.88	0.88	0.88	0.88	0.89	0.88	0.89	0.89	0.89
DAP	1	0.97	0.92	0.95	0.94	0.97	1.01	1.06	1.09	1.14	1.13	1.11	1.19	1.22	1.25	1.22	1.23	1.25	1.24	1.25	1.31	1.28	1.33	1.35	1.29	1.26	1.22	1.22	1.2	1.22	1.17	1.15	1.11	1.15	1.13	1.12	1.13	1.14	1.14	1.21	1.24	1.22	1.2	1.23	1.26	1.26	1.27	1.2	1.16
DAZAP2	1	0.94	0.81	0.76	0.78	0.79	0.81	0.85	0.87	0.86	0.88	0.88	0.87	0.87	0.88	0.91	0.91	0.9	0.9	0.95	1.01	0.96	0.94	0.97	1.01	1.02	1.02	0.98	0.96	0.96	0.95	0.94	0.98	0.97	1	0.94	0.97	1	1.02	1.03	1.03	1.01	1.05	1.05	1.04	1.03	0.99	1	1.01
DB	1	0.97154	0.93615	0.91846	0.93154	0.94154	0.95769	0.96077	0.96846	0.96846	0.97308	0.98154	0.99308	0.99231	0.99692	1.01769	1.02538	1.02538	1.01154	1.01385	1.02769	1.02692	1.03385	1.03462	1.03231	1.03538	1.02538	1.03154	1.01077	0.99846	1.00077	1.00769	0.99846	0.99923	1.00692	1.00462	1.00615	1.02231	1.03615	1.03692	1.03615	1.02615	1.03231	1.04	1.05231	1.05308	1.04846	1.05	1.05154
DB049861	1	0.99	1.02	1.02	1.02	1.04	1.03	1.07	1.16	1.18	1.17	1.15	1.09	1.02	0.95	0.95	0.95	1.02	1.1	1.12	1.18	1.18	1.17	1.12	1.09	1.12	1.05	1.06	1.13	1.13	1.12	1.1	1.14	1.16	1.2	1.2	1.18	1.23	1.21	1.23	1.25	1.26	1.27	1.28	1.27	1.24	1.18	1.14	1.16
DB054822	1	0.93	0.91	0.89	0.97	1.04	1.07	1.06	1.04	1.03	1.02	1.04	1.05	1.03	1.06	1.08	1.04	1.05	1.1	1.05	1.06	1.07	1.07	1.06	1.05	1.07	1.07	1.07	1	0.99	0.95	0.96	1	1.03	1.02	1.02	1.04	1.01	1.05	1.05	1.03	1.03	1.01	0.99	0.97	0.98	1.01	1.02	1.02
DB186251	1	0.97	0.92	0.8	0.68	0.63	0.63	0.6	0.6	0.61	0.61	0.62	0.61	0.61	0.59	0.57	0.58	0.58	0.6	0.6	0.6	0.6	0.59	0.58	0.58	0.59	0.59	0.6	0.63	0.64	0.62	0.63	0.6	0.6	0.59	0.59	0.6	0.61	0.61	0.61	0.63	0.64	0.61	0.63	0.64	0.65	0.67	0.64	0.64
DB344099	1	1.05	1.06	1.03	1.02	1	0.99	0.97	0.94	0.95	0.95	0.94	0.92	0.9	0.93	0.92	0.91	0.92	0.91	0.92	0.91	0.92	0.92	0.93	0.93	0.92	0.95	0.96	0.94	0.95	0.95	0.97	0.98	0.97	0.97	0.94	0.92	0.91	0.92	0.92	0.9	0.89	0.91	0.9	0.89	0.91	0.92	0.91	0.92
DB522524	1	1.02	1.06	1.11	1.12	1.12	1.11	1.08	1.1	1.11	1.11	1.12	1.11	1.07	1.07	1.09	1.05	1.11	1.1	1.12	1.14	1.15	1.2	1.26	1.22	1.2	1.2	1.21	1.23	1.22	1.19	1.16	1.17	1.13	1.17	1.15	1.16	1.2	1.21	1.2	1.19	1.21	1.23	1.22	1.22	1.21	1.18	1.15	1.1
DC347972	1	1.02	1.045	1.06	1.095	1.095	1.08	1.085	1.09	1.095	1.105	1.1	1.09	1.08	1.075	1.06	1.06	1.07	1.09	1.08	1.075	1.085	1.09	1.08	1.085	1.08	1.075	1.075	1.07	1.06	1.045	1.035	1.045	1.07	1.065	1.055	1.055	1.055	1.035	1.02	1.03	1.04	1.045	1.05	1.045	1.04	1.045	1.055	1.07
DCBLD2	1	1	1.02	1.02	1.03	1.06	1.07	1.07	1.06	1.06	1.09	1.11	1.11	1.1	1.11	1.12	1.13	1.13	1.13	1.11	1.13	1.12	1.12	1.11	1.1	1.1	1.09	1.09	1.09	1.07	1.07	1.06	1.09	1.09	1.08	1.04	1.04	1.04	1.05	1.05	1.04	1.02	1.02	1.01	1.02	1.04	1.11	1.09	1.09
DDEF2	1	0.99	0.97	0.98	1	1.01	1.03	1.02	1.01	1.01	1.01	1.01	1.02	1.02	1.02	1	1	1	0.98	1	1.01	1	1.01	1.02	1.03	1.03	1.04	1.04	1.06	1.06	1.06	1.06	1.06	1.06	1.06	1.07	1.06	1.06	1.07	1.07	1.06	1.06	1.06	1.05	1.04	1.04	1.04	1.05	1.06
DDT	1	0.88	0.8	0.78	0.83	0.88	0.92	0.92	0.89	0.88	0.93	0.96	1.03	1.07	1.1	1.13	1.15	1.15	1.21	1.19	1.18	1.16	1.12	1.06	1.07	1.1	1.08	1.08	1.09	1.09	1.05	1.04	1.09	1.13	1.18	1.17	1.17	1.18	1.16	1.14	1.13	1.14	1.16	1.21	1.23	1.26	1.31	1.28	1.28
DDX10	1	1.02	1.06	1.07	1.08	1.09	1.08	1.1	1.1	1.09	1.07	1.02	1.01	1	1.03	1.04	1.05	1	0.99	1.01	1	1.04	1.05	1.05	0.99	0.99	0.99	0.98	0.95	0.96	0.94	0.94	0.93	0.94	0.95	0.99	1.01	1	0.98	0.94	0.96	0.98	1.01	1.01	0.98	1	0.99	0.97	1
DDX18	1	1.0425	1.09	1.085	1.1	1.11	1.1225	1.125	1.1175	1.1225	1.12	1.115	1.1075	1.1025	1.095	1.0875	1.0825	1.085	1.09	1.095	1.095	1.0825	1.08	1.085	1.085	1.0875	1.07	1.0575	1.0525	1.055	1.06	1.05	1.0425	1.0375	1.0325	1.035	1.035	1.03	1.04	1.0375	1.0375	1.035	1.02	1.02	1.0425	1.0375	1.0375	1.025	1.025
DDX46	1	1.08	1.15	1.15	1.09	1.075	1.055	1.035	1.025	1.02	1.025	1.015	1.015	1	1	0.995	0.985	0.975	0.97	0.965	0.965	0.965	0.96	0.96	0.955	0.955	0.96	0.965	0.975	0.98	0.98	0.97	0.955	0.95	0.945	0.945	0.935	0.925	0.92	0.915	0.925	0.905	0.895	0.915	0.9	0.9	0.92	0.925	0.93
DDX5	1	1.06286	1.08571	1.04571	1.00429	0.97571	0.94714	0.92714	0.90714	0.89286	0.88	0.87857	0.87571	0.87857	0.86857	0.85	0.84143	0.84429	0.84857	0.84	0.82429	0.80714	0.79	0.78714	0.78857	0.79571	0.80429	0.80571	0.80857	0.80857	0.8	0.81	0.79857	0.79	0.79429	0.78857	0.78429	0.78429	0.77714	0.76286	0.76	0.75714	0.76143	0.77	0.76143	0.74714	0.73857	0.74286	0.75429
DEK	1	1.06	1.085	1.07	1	0.965	0.95	0.945	0.93	0.91	0.905	0.875	0.88	0.9	0.895	0.89	0.91	0.915	0.905	0.88	0.855	0.835	0.805	0.81	0.82	0.875	0.9	0.885	0.845	0.825	0.82	0.81	0.81	0.8	0.815	0.805	0.805	0.82	0.825	0.805	0.825	0.865	0.885	0.865	0.82	0.805	0.825	0.84	0.84
DHX15	1	1.06	1.08	1.06	0.97	0.91	0.87	0.84	0.83	0.84	0.84	0.83	0.84	0.81	0.8	0.8	0.8	0.8	0.79	0.78	0.78	0.77	0.77	0.77	0.76	0.76	0.76	0.77	0.79	0.8	0.79	0.78	0.77	0.76	0.76	0.76	0.76	0.76	0.76	0.76	0.76	0.75	0.76	0.77	0.77	0.77	0.76	0.76	0.77
DHX16	1	1.06	1.06	1.02	0.99	0.96	0.95	0.96	0.97	0.96	0.95	0.96	0.95	0.97	0.98	0.97	0.97	0.96	0.95	0.93	0.94	0.94	0.93	0.95	0.97	0.97	0.98	0.98	0.97	0.98	0.99	0.97	0.96	0.95	0.94	0.94	0.93	0.93	0.93	0.92	0.93	0.91	0.89	0.87	0.88	0.87	0.87	0.88	0.87
DKKL1	1	1.08	1.12	1.11	1.12	1.11	1.11	1.22	1.2	1.18	1.11	1.08	1.19	1.15	1.14	1.14	1.14	1.14	1.16	1.15	1.16	1.16	1.14	1.14	1.15	1.16	1.16	1.18	1.17	1.16	1.1	1.05	1.1	1.16	1.15	1.12	1.12	1.06	1.04	1.04	1.04	1.04	1.03	1	1	0.99	0.99	0.98	0.98
DLGAP1	1	1.04	1.2	1.19	1.29	1.32	1.3	1.31	1.33	1.24	1.24	1.29	1.44	1.68	1.66	1.53	1.53	1.53	1.58	1.52	1.54	1.47	1.57	1.59	1.57	1.56	1.51	1.43	1.44	1.54	1.55	1.5	1.55	1.57	1.4	1.42	1.48	1.43	1.38	1.25	1.19	1.2	0.98	1.01	0.96	0.89	0.87	0.88	1.05
DMTF1	1	1.08	1.14	1.16	1.22	1.27	1.32	1.27	1.25	1.23	1.13	1.09	1.06	0.98	0.94	0.91	0.92	0.97	0.97	0.91	0.89	0.88	0.87	0.84	0.83	0.8	0.8	0.79	0.79	0.8	0.8	0.8	0.8	0.79	0.74	0.74	0.71	0.68	0.67	0.69	0.71	0.75	0.74	0.72	0.71	0.73	0.76	0.77	0.78
DNAJA1	1	0.91	0.83	0.86	0.86	0.92	1	1.01	1.02	1.02	1.08	1.05	1.05	1.05	1.01	1	0.96	0.95	0.94	0.91	0.9	0.95	0.95	0.93	0.97	0.96	0.94	0.99	0.94	0.99	0.97	0.95	0.98	1.05	1	0.99	1.02	1.01	1.03	1.09	1.05	1.05	1	1.01	0.99	1.05	1.06	1.06	1.02
DNAjC7	1	0.99	1	1.07	1.08	1.15	1.16	1.14	1.15	1.14	1.14	1.18	1.19	1.18	1.18	1.17	1.14	1.12	1.1	1.09	1.05	1.06	1.05	1.06	1.07	1.1	1.11	1.14	1.14	1.11	1.1	1.1	1.1	1.08	1.09	1.09	1.12	1.13	1.15	1.15	1.16	1.14	1.12	1.09	1.01	1.03	1.01	1	1
DNCH1	1	1	1.02	1.03	1.04	1.02	1.02	1	1	0.99	0.98	0.98	0.99	0.99	0.99	0.99	0.99	0.98	0.99	1	1	1.01	1.01	1.03	1.03	1.04	1.04	1.05	1.05	1.04	1.05	1.05	1.05	1.05	1.03	1.06	1.05	1.04	1.02	1	1.02	1.05	1.05	1.03	1.01	1.01	1	1.02	1.02
DNMT1	1	1.0425	1.12	1.195	1.205	1.1675	1.12	1.0875	1.0425	0.995	0.975	0.9625	0.96	0.9825	0.9725	0.9775	0.97	0.9725	0.965	0.9625	0.96	0.955	0.95	0.935	0.915	0.9075	0.905	0.9125	0.93	0.9025	0.9125	0.895	0.8925	0.89	0.88	0.865	0.885	0.895	0.9025	0.9075	0.8975	0.9	0.905	0.9125	0.9325	0.9325	0.93	0.9325	0.9375
DUSP18	1	1.01	1.04	1.05	1.09	1.11	1.11	1.1	1.09	1.08	1.07	1.07	1.08	1.07	1.04	1.05	1.06	1.04	1.02	1.01	1.01	1.01	1.02	1.04	1.05	1.05	1.05	1.04	1.04	1.04	1.02	1.02	1.02	1.01	1.04	1.05	1.04	1.05	1.03	1.02	1.02	1.02	1.02	1.02	1.01	1.03	1.03	1.02	1.02
EE1E1F	1	0.99	0.97	0.93	0.96	0.96	0.91	0.89	0.83	0.8	0.78	0.79	0.79	0.78	0.75	0.76	0.75	0.71	0.66	0.69	0.69	0.71	0.7	0.69	0.7	0.7	0.71	0.7	0.71	0.73	0.73	0.73	0.72	0.71	0.72	0.73	0.72	0.7	0.69	0.66	0.63	0.62	0.62	0.63	0.62	0.6	0.6	0.61	0.61
EED	1	1.12	1.16	1.11	1.06	1.03	1.03	1.03	1.02	1.02	1.02	1.01	1	0.98	0.97	0.96	0.95	0.94	0.94	0.94	0.95	0.95	0.94	0.95	0.94	0.94	0.94	0.94	0.92	0.92	0.91	0.91	0.91	0.91	0.91	0.9	0.9	0.9	0.9	0.91	0.91	0.9	0.9	0.9	0.89	0.88	0.88	0.88	0.88
EEF1A1	1	0.905	0.765	0.74	0.72	0.71	0.715	0.71	0.7	0.695	0.705	0.71	0.72	0.72	0.745	0.75	0.74	0.72	0.685	0.685	0.685	0.69	0.755	0.75	0.75	0.76	0.735	0.78	0.78	0.76	0.78	0.815	0.84	0.81	0.885	0.855	0.845	0.89	0.905	0.94	0.935	0.95	0.965	0.97	0.985	0.995	0.98	0.985	0.955
EEF1E1	1	1	0.99	0.96	0.985	1.04	1.05	1.095	1.105	1.145	1.175	1.17	1.15	1.11	1.07	1.035	1.015	1.045	1.075	1.055	1.05	1.05	1.04	1.025	1.04	1.15	1.17	1.18	1.175	1.08	1.05	0.98	0.945	0.945	0.99	1.03	1.04	1.02	1	1.02	1.015	1	0.985	0.995	0.98	0.975	1.085	1.04	1.07
EEF2	1	0.985	0.99	1.02	1.045	1.06	1.055	1.035	0.99	0.965	0.995	1.035	1.02	0.96	0.955	0.95	0.95	0.965	0.96	0.94	0.935	0.92	0.9	0.89	0.885	0.875	0.86	0.84	0.855	0.875	0.915	0.9	0.895	0.86	0.85	0.82	0.825	0.82	0.84	0.85	0.845	0.82	0.805	0.795	0.8	0.79	0.78	0.79	0.8
EIF1AX	1	0.97	0.92	0.92	0.97	1	1.04	1.11	1.13	1.16	1.23	1.27	1.27	1.2	1.22	1.27	1.33	1.35	1.38	1.34	1.32	1.33	1.35	1.35	1.36	1.37	1.33	1.36	1.35	1.35	1.39	1.42	1.38	1.36	1.34	1.32	1.33	1.38	1.41	1.45	1.47	1.51	1.52	1.48	1.5	1.52	1.49	1.51	1.52
EIF2S2	1	0.93	0.92	0.95	0.96	0.94	0.9	0.87	0.9	0.94	0.98	0.96	0.94	0.94	0.97	1.02	1.05	1.02	1.01	1.01	1	0.87	0.84	0.93	0.93	0.91	0.92	0.95	0.95	1	0.98	0.98	1	1.01	0.98	0.98	1.02	1.05	1.02	0.98	0.97	0.9	0.9	1.03	1.04	1.03	0.99	1.02	1.05
EIF2S3	1	1.09	1.115	1.05	1.03	1.045	1.05	1.065	1.105	1.11	1.09	1.115	1.09	1.065	1.065	1.045	1.06	1.065	1.085	1.07	1.065	1.055	1.055	1.01	0.995	0.99	0.97	0.955	0.975	1.025	1.075	1.1	1.07	1.01	0.965	0.96	1.015	1.025	1.005	1.005	1.005	1	0.975	0.935	0.91	0.89	0.875	0.91	0.935
EIF3S12	1	1.016	1.03	1.042	0.98	0.93	0.89	0.856	0.848	0.848	0.854	0.844	0.852	0.852	0.836	0.84	0.86	0.86	0.856	0.842	0.838	0.836	0.85	0.858	0.866	0.846	0.848	0.846	0.846	0.838	0.838	0.866	0.858	0.854	0.846	0.834	0.828	0.83	0.816	0.822	0.832	0.826	0.82	0.794	0.804	0.806	0.81	0.786	0.788
EIF3SC1	1	1.12	1.21	1.16	1.09	0.99	0.9	0.87	0.85	0.84	0.8	0.79	0.79	0.76	0.76	0.77	0.77	0.76	0.75	0.72	0.7	0.7	0.67	0.67	0.67	0.68	0.69	0.68	0.69	0.66	0.67	0.69	0.67	0.67	0.65	0.66	0.65	0.65	0.63	0.62	0.63	0.65	0.66	0.67	0.64	0.65	0.64	0.59	0.59
EIF3SH5	1	0.91	0.85	0.79	0.87	0.88	0.84	0.83	0.83	0.83	0.83	0.79	0.8	0.81	0.79	0.78	0.9	1.02	1.03	1.03	0.94	0.93	0.93	0.94	0.93	0.9	0.89	0.87	0.77	0.7	0.7	0.69	0.69	0.7	0.68	0.69	0.71	0.76	0.76	0.75	0.7	0.69	0.7	0.73	0.76	0.81	0.76	0.74	0.78
EIF4A1	1	0.90667	0.84333	0.88667	0.98667	1.02667	1.05667	1.07333	1.08333	1.06333	1.08	1.09333	1.09	1.11667	1.11	1.15	1.15333	1.13667	1.08333	1.04333	1.06	1.08333	1.15	1.05333	1.03667	1.03333	1.03	1.02667	1.00667	0.99	0.94667	0.97333	1.03	1.07667	1.13	1.14667	1.15667	1.19333	1.22667	1.17	1.17	1.15667	1.14333	1.10333	1.02667	1.14667	1.14333	1.13667	1.11333
EIF4BP1	1	0.86	0.72	0.71	0.7	0.71	0.68	0.65	0.67	0.68	0.67	0.66	0.67	0.69	0.71	0.7	0.7	0.68	0.67	0.65	0.65	0.66	0.66	0.66	0.65	0.65	0.65	0.65	0.65	0.64	0.64	0.63	0.66	0.67	0.67	0.66	0.68	0.69	0.67	0.68	0.7	0.69	0.69	0.67	0.71	0.73	0.71	0.71	0.73
EIF4E	1	0.92	0.82	0.73	0.77	0.81	0.85	0.85	0.81	0.82	0.83	0.86	0.85	0.82	0.82	0.83	0.85	0.88	0.87	0.85	0.84	0.83	0.81	0.81	0.81	0.81	0.82	0.83	0.84	0.83	0.84	0.85	0.84	0.83	0.83	0.84	0.83	0.83	0.83	0.82	0.82	0.82	0.88	0.9	0.93	0.94	0.9	0.96	0.97
EIF4E2	1	1	1.22	1.3	1.32	1.31	1.31	1.33	1.32	1.37	1.38	1.47	1.55	1.6	1.59	1.57	1.58	1.54	1.58	1.66	1.04	1.06	0.96	0.95	0.91	0.9	0.88	0.84	0.82	0.81	0.81	0.79	0.77	0.75	0.72	0.75	0.83	0.81	0.8	0.78	0.81	0.86	0.92	0.98	0.98	0.88	0.8	0.69	0.64
EIF4EBP1	1	0.93	1.015	0.995	0.96	1.015	1.04	1.03	1.04	1.09	1.1	1.135	1.14	1.135	1.13	1.115	1.06	1.065	1.055	1.04	1.035	1.04	1.06	1.055	1.055	1.08	1.085	1.075	1.035	1.05	1	1.005	1.04	1.045	1.06	1.065	1.055	1.04	1.01	1.005	1.015	1.015	1.025	1.03	1.085	1.08	1.055	1.06	1.075
EIF4G3	1	1	0.94	0.9	0.89	0.95	1.06	1.13	1.11	1.1	1.09	1.16	1.14	1.15	1.16	1.2	1.22	1.2	1.18	1.18	1.31	1.33	1.29	1.24	1.25	1.15	1.25	1.23	1.24	1.25	1.23	1.22	1.16	1.2	1.22	1.22	1.23	1.18	1.2	1.15	1.16	1.13	1.12	1.13	1.24	1.24	1.19	1.16	1.22
EIF5B	1	1	0.9725	0.96	0.98	0.9825	0.9875	0.9725	0.9375	0.9225	0.9175	0.92	0.9175	0.9475	0.9525	0.96	0.9775	0.975	0.9825	1.005	1.025	1.04	1.0625	1.0775	1.095	1.0725	1.0825	1.1225	1.14	1.135	1.145	1.1525	1.165	1.165	1.1525	1.145	1.1375	1.18	1.1925	1.17	1.2075	1.2175	1.215	1.2025	1.19	1.165	1.165	1.1925	1.155
EMP3	1	0.8	0.7	0.67	0.64	0.59	0.5	0.48	0.49	0.41	0.36	0.37	0.48	0.54	0.48	0.46	0.48	0.48	0.45	0.47	0.58	0.67	0.67	0.62	0.67	0.61	0.45	0.37	0.37	0.57	0.62	0.61	0.67	0.63	0.59	0.59	0.57	0.62	0.7	0.64	0.71	0.83	0.77	0.68	0.64	0.71	0.71	0.72	0.68
ENO1	1	0.965	0.935	0.9525	1.0225	1.0525	1.075	1.1	1.1225	1.15	1.155	1.15	1.1475	1.1625	1.1825	1.2	1.2175	1.2	1.1825	1.195	1.2	1.205	1.1675	1.175	1.195	1.1725	1.16	1.16	1.17	1.1925	1.1925	1.1725	1.16	1.1875	1.195	1.1925	1.1675	1.1675	1.1675	1.185	1.1725	1.165	1.18	1.1825	1.1775	1.18	1.1925	1.1925	1.2
ENY2	1	1.02	1.03	0.96	0.81	0.74	0.73	0.72	0.73	0.73	0.74	0.76	0.77	0.75	0.73	0.73	0.7	0.7	0.72	0.71	0.69	0.7	0.7	0.72	0.71	0.7	0.7	0.69	0.69	0.7	0.71	0.72	0.73	0.71	0.7	0.7	0.72	0.73	0.71	0.71	0.72	0.72	0.74	0.75	0.74	0.75	0.74	0.71	0.71
ERG	1	1.08	1.08	1.06	1.01	0.96	0.92	0.91	0.91	0.88	0.87	0.86	0.88	0.92	0.89	0.88	0.85	0.83	0.83	0.83	0.83	0.82	0.81	0.84	0.88	0.85	0.84	0.84	0.82	0.82	0.83	0.83	0.83	0.84	0.86	0.88	0.88	0.88	0.83	0.85	0.85	0.86	0.87	0.84	0.85	0.84	0.83	0.83	0.82
FABP5	1	0.965	0.93	0.925	0.96	1.025	1.06	1.105	1.075	1.055	1.03	1.045	1.04	1.065	1.085	1.07	1.09	1.095	1.135	1.15	1.145	1.125	1.12	1.115	1.13	1.17	1.175	1.195	1.22	1.24	1.255	1.255	1.195	1.215	1.16	1.16	1.175	1.13	1.12	1.1	1.06	1.05	1.04	1.035	1.025	1.025	1.065	1.06	1.07
FADD	1	1.03	1.03	1.04	1.03	1.02	1.03	1.05	1.07	1.03	1.02	0.93	0.91	0.89	0.89	0.86	0.87	0.87	0.83	0.82	0.81	0.84	0.86	0.88	0.89	0.89	0.87	0.87	0.85	0.86	0.83	0.83	0.83	0.82	0.81	0.82	0.82	0.81	0.8	0.8	0.81	0.81	0.81	0.8	0.8	0.79	0.81	0.81	0.82
FAM128A	1	1.04	1.06	1.05	0.96	0.96	0.93	0.91	0.88	0.86	0.87	0.88	0.87	0.86	0.85	0.82	0.82	0.81	0.79	0.78	0.77	0.77	0.76	0.74	0.75	0.76	0.75	0.71	0.71	0.78	0.8	0.82	0.84	0.84	0.8	0.81	0.8	0.79	0.79	0.78	0.79	0.79	0.81	0.82	0.82	0.82	0.81	0.8	0.79
FAU	1	1.012	1.014	0.996	0.996	0.984	0.972	0.964	0.958	0.958	0.958	0.958	0.944	0.948	0.962	0.958	0.958	0.942	0.938	0.948	0.956	0.962	0.956	0.968	0.97	0.976	0.976	0.978	0.988	1.024	1.05	1.028	1.02	0.998	0.966	0.956	0.952	0.938	0.914	0.914	0.92	0.932	0.934	0.936	0.938	0.932	0.942	0.988	1.012
FBXO9	1	1.02	1.03	1.06	1.13	1.14	1.09	1.07	1.07	1.04	1.06	1.13	1.14	1.12	1.09	1.03	0.97	0.96	0.95	0.92	0.9	0.91	0.94	0.95	0.91	0.9	0.94	0.96	0.94	0.91	0.89	0.82	0.81	0.81	0.83	0.82	0.8	0.8	0.8	0.79	0.78	0.82	0.87	0.92	0.95	0.97	1	0.95	0.94
FER1L3	1	1.01	1.01	1	1.05	1.06	1.07	1.09	1.09	1.12	1.14	1.14	1.13	1.13	1.13	1.12	1.14	1.19	1.18	1.2	1.2	1.19	1.17	1.12	1.1	1.13	1.16	1.21	1.24	1.23	1.22	1.21	1.21	1.21	1.2	1.19	1.17	1.2	1.19	1.17	1.18	1.14	1.12	1.11	1.16	1.14	1.12	1.12	1.12
FIGN	1	1.09	1.14	1.13	1.11	1.1	1.07	1.04	0.95	0.98	1.01	1.04	1.03	1.08	1.16	1.23	1.27	1.34	1.34	1.34	1.32	1.38	1.59	1.62	1.61	1.62	1.43	1.45	1.42	1.44	1.29	1.17	1.18	1.2	1.25	1.3	1.3	1.25	1.23	1.25	1.3	1.35	1.25	1.28	1.27	1.11	1.01	0.98	1.03
FLJ10292	1	1.04	1.08	1.09	1.16	1.2	1.21	1.24	1.22	1.23	1.27	1.24	1.21	1.21	1.22	1.21	1.19	1.18	1.16	1.16	1.17	1.16	1.17	1.18	1.18	1.16	1.15	1.17	1.19	1.19	1.21	1.25	1.26	1.26	1.21	1.19	1.19	1.19	1.18	1.16	1.13	1.15	1.12	1.12	1.13	1.12	1.13	1.14	1.13
FLJ20105	1	0.98	0.99	1	1.04	1.08	1.12	1.14	1.15	1.14	1.1	1.05	1.01	1.02	1.04	1.05	1.06	1.08	1.08	1.05	1.05	1.03	1.06	1.06	1.04	1	1	1.13	1.09	1.07	1.09	1.09	1.08	1.08	1.08	1.07	1.06	1.03	1.02	1.05	1.07	1.08	1.06	1.06	1.09	1.09	1.07	1.07	1.03
FLJ20674	1	1.05	1.05	1	0.98	0.97	0.96	0.93	0.92	0.92	0.92	0.93	0.94	0.94	0.94	0.94	0.94	0.95	0.84	0.83	0.94	0.91	0.93	0.95	0.86	0.88	0.9	0.91	0.89	0.91	0.92	0.97	1.01	1.04	1.05	1.07	1.08	1.1	1.13	1.13	1.06	1.04	1.03	1.01	1.02	1.03	1.05	1.04	1.06
FLJ31951	1	0.99	0.99	1.02	1.05	1.07	1.08	1.07	1.07	1.06	1.04	1.06	1.08	1.07	1.06	1.04	1.02	1.03	1.03	1.02	1.01	1.03	1.07	1.13	1.16	1.13	1.12	1.11	1.12	1.14	1.12	1.06	1.09	1.1	1.07	1.06	1.08	1.08	1.07	1.09	1.12	1.11	1.12	1.13	1.07	1.07	1.05	1.05	1.05
FSCN1	1	1	1	0.98	0.98	1	1.04	1.07	1.09	1.08	1.07	1.07	1.06	1.04	1.04	1.04	1.06	1.07	1.06	1.05	1.05	1.05	1.04	1.04	1.03	1.03	1.03	1.03	1.04	1.05	1.05	1.06	1.05	1.04	1.04	1.04	1.04	1.05	1.06	1.06	1.06	1.06	1.03	1.01	1.04	1.04	1.04	1.03	1.01
FYTTD1	1	1	0.99	0.97	0.99	0.99	1.02	1	1.03	1.08	1.07	1.08	1.09	1.1	1.11	1.08	1.08	1.09	1.09	1.11	1.13	1.11	1.09	1.06	1.03	1.02	1.02	1.02	1.04	1.06	1.01	0.99	1	1	1	1.02	1.05	1.11	1.17	1.15	1.11	1.13	1.14	1.13	1.13	1.12	1.14	1.21	1.18
GABARAP	1	0.93	0.9	0.91	0.95	0.99	1.04	1.03	1	1	0.99	1	0.99	1.04	1	0.98	1.02	1.05	1.06	1.06	1.09	1.15	1.12	1.12	1.11	1.14	1.14	1.13	1.1	1.09	1.09	1.06	1.07	1.06	1.06	1.06	1.04	1.02	1	0.98	0.99	1.01	1.03	1.03	1.04	1.03	1.02	1.02	1
GADD45GIP1	1	1	1.11	1.09	1.13	1.16	1.17	1.17	1.23	1.21	1.14	1.09	1.03	1.01	0.95	0.94	0.96	0.92	0.95	0.89	0.82	0.8	0.78	0.84	0.84	0.85	0.89	1.01	1.02	1.01	0.98	0.95	0.99	0.97	0.98	0.99	0.98	0.98	0.98	0.94	0.96	1.03	1.19	1.32	1.37	1.3	1.25	1.21	1.13
GALNT2	1	1.04	1.01	0.89	0.83	0.81	0.78	0.76	0.74	0.74	0.75	0.74	0.76	0.75	0.75	0.74	0.74	0.73	0.71	0.71	0.7	0.7	0.68	0.71	0.71	0.7	0.69	0.68	0.71	0.71	0.71	0.71	0.71	0.7	0.71	0.71	0.7	0.7	0.72	0.71	0.72	0.71	0.72	0.73	0.72	0.75	0.74	0.74	0.75
GCHFR	1	0.91	0.82	0.79	0.81	0.85	0.89	0.9	0.92	0.92	0.92	0.92	0.97	0.98	1.01	1.01	0.99	0.98	0.95	1	1.05	1.04	1.02	0.99	1	1	1.01	1.03	1.04	1.06	1.02	1.03	1.09	1.1	1.11	1.1	1.09	1.1	1.11	1.12	1.13	1.14	1.11	1.14	1.15	1.16	1.17	1.2	1.21
GMNN	1	0.995	0.995	0.9	0.79	0.71	0.685	0.675	0.675	0.69	0.71	0.705	0.71	0.71	0.71	0.72	0.705	0.71	0.73	0.725	0.715	0.725	0.745	0.75	0.745	0.745	0.75	0.765	0.76	0.775	0.79	0.805	0.825	0.85	0.835	0.84	0.845	0.81	0.795	0.805	0.825	0.835	0.9	0.965	0.97	0.97	0.91	0.87	0.865
GLO1	1	0.99	1.02	1.04	1.06	1.15	1.17	1.22	1.27	1.28	1.28	1.28	1.24	1.27	1.32	1.28	1.17	1.18	1.25	1.36	1.42	1.39	1.27	1.11	1.11	1.07	1.07	1.11	1.08	1.04	1.07	1.1	1.04	1.17	1.23	1.31	1.29	1.26	1.26	1.36	1.3	1.26	1.18	1.18	1.19	1.17	1.11	1.11	1.1
GLRX	1	0.97	0.98	1.01	1.13	1.11	1.14	1.21	1.2	1.18	1.21	1.18	1.06	1.06	1.09	1.16	1.16	1.14	1.09	1.08	1.07	1.09	1.04	1.01	0.98	1	1.03	1.02	1.05	1.03	0.98	1.01	1.04	1.09	1.1	1.09	1.06	1.04	1.08	1.13	1.15	1.15	1.14	1.15	1.15	1.12	1.14	1.16	1.12
GNB2L1	1	0.93	0.875	0.875	0.93	0.935	0.915	0.915	0.925	0.955	0.995	1.01	1.05	1.07	1.07	1.045	1.015	0.995	1.015	1.06	1.08	1.055	1.05	1.075	1.06	1.05	1.09	1.12	1.105	1.125	1.115	1.085	1.105	1.1	1.11	1.13	1.145	1.135	1.15	1.185	1.18	1.18	1.135	1.11	1.105	1.105	1.085	1.09	1.11
GRPEL1	1	1.04	1.06	1.04	1.04	1.01	1	1.06	1.05	1.08	1.15	1.05	1	1.03	1.07	1.09	1.12	1.17	1.19	1.23	1.18	1.14	1.16	1.2	1.27	1.26	1.19	1.17	1.16	1.2	1.15	1.14	1.15	1.18	1.21	1.22	1.21	1.21	1.23	1.23	1.22	1.21	1.18	1.22	1.22	1.23	1.15	1.06	1.05
GSPT1	1	1	1.03	1.04	1.02	1.05	1.06	1.07	1.07	1.06	1.06	1.06	1.06	1.08	1.08	1.07	1.06	1.05	1.06	1.04	1.04	1.05	1.06	1.05	1.07	1.07	1.07	1.07	1.09	1.05	1.04	1.07	1.02	1.02	1.03	1.04	1	1	0.98	0.98	0.98	0.97	0.98	0.97	0.96	0.95	0.94	0.94	0.94
GTF2F2	1	1.04	1.05	1.055	1.055	1.035	1.02	1	0.98	0.98	1.005	1.005	0.985	0.95	0.93	0.915	0.91	0.91	0.89	0.9	0.92	0.925	0.935	0.94	0.93	0.925	0.915	0.915	0.925	0.93	0.93	0.945	0.925	0.915	0.92	0.945	0.945	0.94	0.94	0.955	0.955	0.96	0.965	0.955	0.94	0.955	0.955	0.975	0.98
H1299	1	1.055	1.135	1.12	1.15	1.17	1.195	1.21	1.225	1.23	1.24	1.245	1.25	1.25	1.255	1.255	1.245	1.245	1.23	1.225	1.22	1.22	1.21	1.21	1.215	1.22	1.22	1.22	1.225	1.225	1.225	1.225	1.22	1.21	1.21	1.2	1.205	1.215	1.215	1.21	1.205	1.2	1.195	1.19	1.18	1.175	1.17	1.165	1.17
H2AFV	1	1.045	1.125	1.135	1.1	1.07	1.07	1.11	1.18	1.205	1.205	1.205	1.21	1.12	1.1	1.09	1.06	1.055	1.04	1.02	1.005	1.005	1.02	1.02	0.99	0.995	0.995	1.005	1.02	1.03	0.99	0.985	0.97	0.97	0.965	0.965	0.975	0.985	0.995	0.995	0.98	0.955	0.955	0.97	0.965	0.955	0.97	0.95	0.935
HAT1	1	1.115	1.19	1.19	1.175	1.145	1.16	1.155	1.165	1.175	1.17	1.145	1.085	1.055	1.04	1.06	1.055	1.045	1.05	0.97	0.945	0.925	0.905	0.88	0.86	0.87	0.885	0.925	0.94	0.985	0.965	0.955	0.895	0.87	0.885	0.895	0.885	0.92	0.9	0.9	0.885	0.88	0.87	0.855	0.845	0.85	0.895	0.91	0.91
HDAC2	1	1.01429	1.01429	1.05714	1.08571	1.08571	1.11	1.12571	1.14286	1.14857	1.15286	1.17857	1.19	1.19	1.20571	1.22714	1.21	1.21143	1.19429	1.17714	1.13857	1.13429	1.12714	1.12286	1.13	1.13286	1.11714	1.11857	1.13	1.13286	1.12286	1.12857	1.12571	1.12857	1.13714	1.12	1.12	1.14714	1.15571	1.16	1.14857	1.12429	1.12286	1.10286	1.1	1.09286	1.07286	1.05143	1.06857
HDGF	1	1.03	1.02	0.98	0.9	0.85	0.82	0.8	0.79	0.78	0.79	0.8	0.79	0.78	0.77	0.77	0.75	0.74	0.73	0.73	0.71	0.71	0.72	0.72	0.71	0.71	0.71	0.69	0.7	0.7	0.71	0.71	0.69	0.68	0.69	0.69	0.7	0.72	0.73	0.73	0.73	0.72	0.7	0.71	0.7	0.71	0.7	0.7	0.71
hK2	1	1.03	1.03	0.96	0.85	0.87	0.95	0.94	0.92	0.94	0.91	0.92	0.93	0.95	0.91	0.89	0.92	0.99	1.02	1.05	1.07	1.11	1.11	1.09	1.1	1.12	1.11	1.02	1.02	0.99	0.92	0.9	0.89	0.74	0.71	0.75	0.74	0.84	0.85	0.82	0.82	0.83	0.85	0.88	0.92	0.91	0.9	0.88	0.83
HMG2L1	1	1.09	1.17	1.15	1.14	1.13	1.11	1.09	1.08	1.08	1.08	1.07	1.06	1.06	1.07	1.06	1.05	1.05	1.06	1.07	1.07	1.06	1.05	1.03	1.03	1.01	1.02	1.02	1.02	1.03	1.04	1.04	1.02	1	1	0.99	1	1	1	0.98	1	0.99	0.99	0.98	0.97	0.98	0.94	0.93	0.94
HMGB1	1	0.92	0.83	0.83	0.93	0.96	0.96	0.97	0.99	1	1.02	1.11	1.16	1.17	1.17	1.2	1.17	1.16	1.13	1.12	1.08	1.05	1.12	1.12	1.26	1.27	1.34	1.32	1.5	1.39	1.36	1.17	1.21	1.23	1.24	1.23	1.16	1.19	1.3	1.33	1.29	1.27	1.29	1.32	1.29	1.2	1.19	1.13	1.14
HMGN1	1	1.04	1.08	1.04	1.02	1.02	1.02	1.02	1.04	1.08	1.08	1.09	1.13	1.12	1.08	1.06	1.07	1.06	1.12	1.14	1.16	1.21	1.2	1.21	1.19	1.16	1.12	1.13	1.1	1.12	1.13	1.15	1.14	1.14	1.16	1.19	1.2	1.17	1.16	1.16	1.15	1.15	1.16	1.15	1.16	1.17	1.23	1.04	1.01
HMGN2	1	1.05	1.105	1.095	1.05	1.015	1.01	1.025	1.065	1.055	1.065	1.055	1.065	1.07	1.08	1.07	1.06	1.045	1.045	1.035	1.035	1.01	1.01	1.03	1.025	1.005	0.995	0.99	0.98	0.98	0.96	0.965	0.98	0.975	0.98	0.98	0.97	0.955	0.955	0.95	0.955	0.955	0.95	0.955	0.94	0.935	0.935	0.935	0.94
HMGN3	1	1.03	1.09	1.09	1.12	1.1	1.1	1.09	1.11	1.11	1.09	1.08	1.09	1.08	1.08	1.07	1.06	1.04	1.04	1.01	1.01	1.06	1.11	1.1	1.11	1.11	1.12	1.09	1.1	1.12	1.16	1.16	1.17	1.18	1.17	1.1	1.04	0.99	0.99	0.99	0.96	0.98	0.98	0.99	0.98	1	1.05	1.07	1.08
HNRPA1	1	1.06	1.1	1.04	0.95	0.91	0.85	0.82	0.81	0.79	0.8	0.8	0.79	0.79	0.79	0.79	0.79	0.79	0.78	0.77	0.79	0.8	0.8	0.79	0.78	0.77	0.77	0.77	0.77	0.78	0.76	0.78	0.77	0.76	0.76	0.77	0.76	0.76	0.75	0.76	0.76	0.77	0.78	0.79	0.79	0.78	0.76	0.75	0.75
HNRPA2B1	1	1.09	1.13	1.16	0.94	0.79	0.71	0.67	0.66	0.63	0.61	0.61	0.63	0.62	0.61	0.6	0.6	0.58	0.58	0.61	0.62	0.63	0.63	0.64	0.64	0.61	0.61	0.6	0.62	0.61	0.62	0.63	0.64	0.65	0.65	0.66	0.68	0.68	0.67	0.67	0.66	0.59	0.56	0.56	0.54	0.54	0.56	0.57	0.54
HNRPD	1	1	1	0.99	0.94	0.87	0.75	0.7	0.69	0.65	0.6	0.6	0.57	0.55	0.55	0.54	0.52	0.51	0.51	0.52	0.53	0.54	0.53	0.52	0.52	0.53	0.52	0.51	0.5	0.5	0.51	0.54	0.54	0.54	0.57	0.57	0.56	0.56	0.57	0.59	0.61	0.6	0.61	0.62	0.62	0.61	0.6	0.58	0.53
HNRPM	1	1.07	1.14	1.21	1.13	1.05	0.99	0.93	0.9	0.88	0.88	0.87	0.87	0.88	0.89	0.88	0.87	0.87	0.87	0.88	0.89	0.89	0.89	0.89	0.89	0.87	0.86	0.87	0.88	0.87	0.86	0.86	0.86	0.86	0.87	0.86	0.87	0.85	0.85	0.85	0.85	0.85	0.86	0.87	0.87	0.85	0.84	0.83	0.83
HSP90AA1	1	0.922	0.876	0.908	0.944	0.942	0.938	0.924	0.902	0.886	0.88	0.87	0.862	0.848	0.86	0.862	0.866	0.906	0.924	0.93	0.92	0.924	0.924	0.922	0.906	0.91	0.94	0.938	0.944	0.968	0.994	1.012	1.006	0.988	0.984	0.98	1.018	1.034	1.026	1.002	0.988	1.014	1.024	1.032	1.06	1.094	1.086	1.096	1.092
HSP90AB1	1	1.025	1.01	1.035	1.045	1.11	1.11	1.065	1.055	1.055	1.05	1.015	0.99	0.965	0.925	0.96	0.97	0.965	0.965	0.945	0.925	0.92	1.055	1.045	1.05	1.015	0.925	0.915	0.885	0.895	0.895	0.905	0.9	0.885	0.845	0.84	0.835	0.855	0.855	0.865	0.865	0.87	0.865	0.855	0.845	0.84	0.83	0.835	0.845
HSPB1	1	1.06	1.13	1.36	1.32	1.26	1.22	1.19	1.16	1.14	1.1	1.08	1.06	1.03	1.02	0.99	0.98	0.98	0.98	0.96	0.87	0.87	0.88	0.88	0.89	0.88	0.89	0.88	0.88	0.89	0.91	0.94	0.9	0.89	0.86	0.86	0.86	0.87	0.86	0.86	0.81	0.81	0.81	0.79	0.85	0.83	0.84	0.84	0.84
HSPCA	1	0.93667	0.91667	0.92333	0.96667	1.04	1.08667	1.06333	1.05333	1.01667	0.99667	1.01	0.93	0.93	0.93667	0.93333	0.93	0.91667	0.92	0.95333	0.95333	0.93667	0.95	0.95	0.97667	0.95333	0.96	0.93	0.92	0.91333	0.89333	0.92667	0.92	0.93	0.96333	0.96667	0.96667	0.94667	0.95	0.93	0.93667	0.95	0.92667	0.96667	1.01667	1.02	0.97667	0.94	0.93333
HSPH1	1	0.96	0.94	0.96	0.91	0.93	0.9	0.87	0.85	0.83	0.83	0.85	0.83	0.84	0.82	0.81	0.83	0.82	0.85	0.89	0.89	0.9	0.91	0.91	0.93	0.94	0.91	0.88	0.89	0.94	0.94	0.96	0.95	0.94	0.95	0.94	0.94	0.94	0.96	1.03	1.04	1.08	1.07	1.09	1.09	1.06	1.14	1.14	1.18
HYPA	1	1.04	1.07	1.05	1.06	1.03	0.99	0.92	0.91	0.9	0.89	0.87	0.85	0.83	0.82	0.81	0.81	0.81	0.8	0.79	0.8	0.8	0.79	0.8	0.8	0.79	0.79	0.79	0.78	0.77	0.78	0.78	0.78	0.78	0.77	0.77	0.78	0.78	0.79	0.78	0.78	0.78	0.8	0.79	0.79	0.78	0.78	0.77	0.77
hypothetical-protein	1	1.06	1.09	1.06	0.93	0.88	0.87	0.89	0.91	0.91	0.9	0.89	0.89	0.88	0.88	0.88	0.87	0.87	0.89	0.88	0.88	0.88	0.88	0.92	0.91	0.89	0.9	0.9	0.95	0.96	0.96	0.97	0.97	0.94	0.97	0.97	0.97	0.97	0.97	0.99	1.01	1.01	1.02	1.02	1.02	1	1.01	0.97	0.97
IFITM2	1	1.02	1.11	1.24	1.22	1.13	1.04	0.97	0.95	0.95	0.95	0.95	0.95	0.94	0.95	0.93	0.92	0.91	0.9	0.9	0.89	0.89	0.89	0.89	0.88	0.87	0.87	0.87	0.87	0.87	0.87	0.87	0.86	0.86	0.87	0.89	0.88	0.88	0.83	0.83	0.83	0.84	0.82	0.81	0.82	0.82	0.84	0.84	0.85
IL3RA	1	0.945	0.94	0.94	0.945	1	1	1.01	1	1.005	0.995	0.995	0.99	0.985	1.02	1.09	1.115	1.13	1.05	1	1.005	0.99	1.005	1	1.065	1.055	1.08	1.065	1.07	1.07	1.1	1.045	1.04	1.02	1.025	1.05	1.105	1.13	1.105	1.105	1.12	1.175	1.27	1.27	1.285	1.25	1.255	1.385	1.345
ILF2	1	1.08	1.12	1.1	1.055	1.025	1.01	1.015	1.03	1.025	1.035	1.03	1.025	1.03	1.01	1.01	0.99	0.995	0.995	1.005	1	1.005	0.99	1.005	1.01	0.995	1.01	1.01	0.99	1.01	1.015	0.995	0.99	0.99	0.995	1.01	1.02	1.015	0.99	0.995	0.99	0.975	0.965	0.98	0.98	0.98	0.965	0.98	0.955
INPP4B	1	0.83	0.76	0.85	0.97	0.98	0.87	0.84	0.86	0.86	0.91	0.93	0.97	0.96	0.95	0.95	1.01	0.94	0.92	0.97	0.99	1.03	1.04	1.03	0.98	0.97	1.04	1.03	0.98	0.98	0.95	0.94	1.02	1.07	1.02	0.98	0.89	0.84	0.82	0.84	0.9	0.89	0.9	0.97	1.05	1.03	1.08	1.04	1.12
ISOC1	1	0.97	0.96	0.97	0.97	1.02	1.06	1.09	1.12	1.2	1.28	1.26	1.38	1.39	1.35	1.32	1.27	1.25	1.25	1.2	1.15	1.08	1.11	1.13	1.16	1.24	1.18	1.13	1.13	1.08	1.14	1.24	1.1	1.08	1.14	1.13	1.24	1.27	1.28	1.37	1.2	1.16	1.2	1.14	1.14	1.14	1.19	1.22	1.19
KIAA0802	1	1.03	1.03	1	1.02	1.03	1.04	1.03	1.02	1.06	1.07	1.06	1.07	1.11	1.2	1.25	1.5	1.49	1.49	1.46	1.45	1.41	1.4	1.38	1.44	1.45	1.43	1.49	1.55	1.45	1.44	1.35	1.49	1.43	1.3	1.26	1.27	1.22	1.27	1.29	1.33	1.3	1.25	1.23	1.24	1.36	1.37	1.38	1.36
KIAA1064	1	1.055	1.095	1.105	1.12	1.155	1.14	1.11	1.07	1.035	1.025	1.005	0.985	0.975	0.945	0.92	0.895	0.89	0.875	0.87	0.855	0.845	0.845	0.825	0.855	0.85	0.85	0.835	0.825	0.825	0.83	0.835	0.83	0.815	0.83	0.825	0.815	0.815	0.835	0.845	0.855	0.86	0.86	0.86	0.855	0.845	0.84	0.845	0.845
KLF3	1	0.87	0.74	0.78	0.82	0.85	0.88	0.89	0.88	0.88	0.88	0.89	0.94	0.94	0.94	0.94	0.94	0.95	0.93	0.93	0.94	0.99	0.98	0.98	0.98	1.02	1.06	1.07	1.03	1.02	1	0.97	0.95	0.97	0.94	0.98	0.92	0.94	0.95	0.96	1.01	1.02	1.03	1.06	1.06	1.08	1.07	1.13	1.09
KLHL31	1	1.06	1.08	1.02	0.96	0.93	0.92	0.92	0.92	0.92	0.92	0.92	0.91	0.91	0.91	0.9	0.9	0.89	0.87	0.85	0.84	0.83	0.83	0.84	0.84	0.84	0.84	0.84	0.83	0.83	0.83	0.82	0.82	0.81	0.81	0.83	0.85	0.85	0.86	0.85	0.84	0.83	0.82	0.82	0.81	0.8	0.83	0.84	0.83
LETM2	1	1.02	1.08	1.15	1.13	1.05	1	0.96	0.98	0.96	0.94	0.91	0.91	0.92	0.91	0.91	0.91	0.9	0.9	0.89	0.88	0.87	0.88	0.89	0.9	0.9	0.91	0.9	0.88	0.89	0.9	0.89	0.88	0.88	0.88	0.87	0.88	0.87	0.85	0.85	0.84	0.84	0.84	0.84	0.83	0.82	0.81	0.79	0.79
LGALS1	1	0.83	0.64	0.67	0.7	0.73	0.82	0.83	0.85	0.84	0.85	0.9	0.91	0.91	0.94	0.92	0.9	0.88	0.86	0.85	0.84	0.82	0.82	0.84	0.84	0.86	0.84	0.83	0.85	0.87	0.89	0.94	0.95	0.95	0.95	0.9	0.88	0.87	0.87	0.86	0.87	0.91	0.95	1	1	1.02	1.03	1.03	1.07
LGALS3	1	0.92	0.91	0.96	0.95	1.02	1.11	1.13	1.12	1.13	1.14	1.13	1.12	1.18	1.27	1.3	1.3	1.27	1.25	1.05	1.05	1.06	1.01	1.04	1.05	1.04	1.05	1.07	1.1	1.12	1.13	1.11	1.09	1.09	1.07	1.07	1.06	1.08	1.08	1.07	1.06	1.06	1.1	1.09	1.07	1.06	1.08	1.12	1.13
LIMA1	1	1.01	0.99	0.96	0.97	0.98	1.01	1.02	1.02	1.02	1.03	1.03	1.01	1.01	1.02	1.05	1.08	1.1	1.13	1.16	1.09	1.09	1.08	1.1	1.06	1.06	1.04	1.02	1.04	1.07	1.07	1.02	1	0.98	0.99	1.03	1.06	1.06	1.07	1.04	1.06	1.12	1.15	1.16	1.18	1.16	1.12	1.08	1.09
LMNA	1	1.065	0.935	0.82	0.705	0.64	0.605	0.63	0.65	0.715	0.725	0.68	0.735	0.765	0.83	0.835	0.86	0.825	0.83	0.955	1.065	1.165	1.24	1.315	1.195	1.07	0.985	1.05	1.06	0.905	0.845	0.825	0.77	0.81	0.925	0.96	1.005	1.005	1.08	1.075	1.045	0.965	0.965	0.995	1.03	1.035	1.035	0.98	0.69
LOC284184	1	1.01	1.08	1.08	1.09	1.09	1.11	1.09	1.11	1.15	1.16	1.16	1.08	1.08	1.06	1.02	1.01	1.02	1.01	1.02	1.03	1.01	1.04	1.03	1.05	1.05	1.05	1.04	1.13	1.12	1.14	1.12	1.12	1.16	1.17	1.15	1.17	1.15	1.06	1.06	1.03	1.02	1.04	1.05	1.04	1.07	1.11	1.12	1.08
LOC441161	1	1.03	1.07	1.08	1.06	1.05	1.05	1.06	1.09	1.08	1.07	1.08	1.06	1.07	1.07	1.08	1.06	1.06	1.06	1.06	1.03	1.03	1.04	1.07	1.08	1.07	1.06	1.04	1.07	1.07	1.06	1.06	1.09	1.08	1.07	1.08	1.11	1.13	1.16	1.17	1.15	1.14	1.13	1.11	1.09	1.07	1.06	1.06	1.08
LONRF3	1	1.01	1.02	1.06	1.1	1.11	1.09	1.05	1.04	1.04	1.05	1.05	1.06	1.05	1.04	1.02	1.05	1.05	1.05	1.04	1.03	1.03	1.01	1	1.02	1.02	1	1.02	1	0.94	0.97	1.03	1.08	1.11	1.11	1.1	1.1	1.12	1.12	1.08	1.07	1.04	1.05	1.13	1.18	1.2	1.2	1.17	1.15
LOXL2	1	1.05	1.09	1.06	1.04	1.03	1.03	1.02	1.02	1.01	1.01	1	1	1	0.99	0.99	0.97	0.97	0.98	0.97	0.99	0.99	0.99	0.99	0.99	0.99	0.99	0.99	0.97	0.97	0.98	0.98	0.97	0.96	0.95	0.94	0.94	0.93	0.93	0.93	0.92	0.92	0.92	0.92	0.92	0.93	0.94	0.94	0.96
LRRC59	1	1.09	1.13	1.13	1.13	1.13	1.12	1.11	1.12	1.11	1.09	1.09	1.09	1.09	1.09	1.11	1.09	1.06	1.04	1.04	1.05	1.09	1.09	1.09	1.09	1.13	1.11	1.12	1.11	1.1	1.11	1.13	1.11	1.11	1.09	1.08	1.07	1.03	0.99	0.99	1	1.01	1	1	1.01	1	1	0.99	0.99
LRRF1P1	1	0.98	0.92	0.9	0.87	0.88	0.89	0.88	0.91	0.93	0.92	0.91	0.91	0.87	0.86	0.85	0.86	0.83	0.82	0.84	0.82	0.8	0.8	0.81	0.82	0.85	0.87	0.89	0.87	0.85	0.83	0.83	0.82	0.87	0.89	0.9	0.94	0.93	0.9	0.89	0.92	0.95	0.96	0.9	0.89	0.9	0.92	0.92	0.93
LRRFIP1	1	0.94	0.91	0.93	0.98	1.03	1.04	1.04	1.07	1.07	1.07	1.07	1.17	1.23	1.22	1.23	1.22	1.17	1.18	1.17	1.16	1.17	1.24	1.31	1.33	1.27	1.26	1.23	1.21	1.19	1.16	1.09	1.23	1.27	1.25	1.23	1.21	1.22	1.18	1.26	1.24	1.21	1.18	1.3	1.41	1.39	1.36	1.29	1.16
LYAR	1	0.91	0.89	0.92	0.93	0.95	0.99	1.03	1.03	1.05	1.04	1.04	1.07	1.12	1.11	1.07	1.07	1.07	1.05	1.01	0.98	1.02	1	0.97	0.95	0.95	0.93	0.95	0.97	1.02	1.06	1.02	0.96	0.94	0.95	0.97	0.95	0.89	0.92	0.97	0.94	0.96	1.03	1.09	1.14	1.09	1.13	1.18	1.14
M62898	1	0.91	0.73	0.73	0.89	1.02	1.04	1.03	0.98	0.99	1.03	1.12	1.14	1.17	1.17	1.18	1.16	1.25	1.24	1.22	1.2	1.18	1.18	1.17	1.15	1.12	1.15	1.18	1.2	1.2	1.19	1.23	1.24	1.23	1.19	1.21	1.17	1.15	1.15	1.16	1.14	1.16	1.14	1.11	1.08	1.09	1.01	1.02	1.04
MAK3	1	1.05	1.12	1.22	1.2	1.16	1.08	1.01	0.98	0.96	0.94	0.92	0.91	0.93	0.93	0.92	0.91	0.91	0.91	0.89	0.89	0.87	0.86	0.85	0.85	0.86	0.86	0.86	0.87	0.85	0.84	0.85	0.85	0.85	0.84	0.82	0.8	0.81	0.84	0.84	0.8	0.8	0.83	0.85	0.87	0.86	0.87	0.86	0.85
MAP2K2	1	0.97	0.95	0.94	0.96	1.03	1.07	1.09	1.1	1.07	1.06	1.04	1.08	1.08	1.07	1.08	1.06	1.05	1.02	1	1.04	1.04	1.01	0.98	1.01	1.01	1.02	1.01	1.02	1.02	1.01	1.03	1.05	1.07	1.11	1.12	1.12	1.14	1.13	1.12	1.12	1.11	1.14	1.12	1.12	1.14	1.15	1.12	1.06
MAPKAP1	1	1.07	1.08	1.04	0.95	0.91	0.87	0.85	0.84	0.82	0.81	0.82	0.82	0.81	0.8	0.79	0.78	0.77	0.76	0.75	0.74	0.74	0.73	0.74	0.74	0.75	0.77	0.76	0.75	0.75	0.75	0.75	0.76	0.74	0.73	0.76	0.76	0.75	0.74	0.71	0.71	0.7	0.69	0.69	0.69	0.69	0.69	0.7	0.71
MCEE	1	0.93	0.8	0.8	0.88	0.88	0.91	0.96	0.93	0.93	0.96	0.97	0.95	0.95	0.98	1.01	1.03	1.05	1.08	1.09	1.09	1.08	1.11	1.1	1	0.95	0.98	0.99	0.99	0.94	0.95	0.91	0.94	0.94	0.96	0.98	0.98	1	1	0.98	1	1	1.01	1.06	1.1	1.08	1.08	1.09	1.15
MDH1	1	1.03	1.06	1.06	1.07	1.04	1	0.99	0.99	0.99	1	1.01	1.04	1.05	1.07	1.07	1.07	1.04	1	0.99	0.99	0.98	0.98	0.97	0.97	1.02	1.04	1.02	1	1.03	1.03	1.01	0.99	0.98	0.97	0.97	0.96	0.96	0.96	0.97	0.97	0.94	0.92	0.9	0.89	0.87	0.86	0.89	0.9
MEGF6	1	0.99	1.04	1.07	1.01	0.92	0.87	0.85	0.86	0.85	0.85	0.85	0.85	0.82	0.8	0.83	0.82	0.85	0.86	0.86	0.86	0.88	0.9	0.89	0.89	0.9	0.91	0.89	0.93	0.96	0.99	0.96	0.98	0.98	0.99	0.98	0.97	0.96	0.97	0.95	0.93	0.95	0.95	0.94	0.96	0.96	0.98	0.94	0.93
METAP2	1	0.99333	0.93333	0.94667	0.94	0.95667	0.96667	0.94667	1.00667	1.02	1.04333	1.07667	1.04	1.05667	1.06	1.11667	1.09	1.10667	1.14	1.12	1.12667	1.08667	1.07333	1.06667	1.03667	1.04	1.03333	1.05333	1.06333	1.07	1.08333	1.09	1.11667	1.12	1.11333	1.14333	1.10667	1.12333	1.14667	1.10333	1.1	1.1	1.09	1.06333	1.14667	1.14	1.15	1.12	1.10667
mimitin	1	1.065	1.105	1.105	1.09	1.075	1.065	1.045	1.035	1.03	1.03	1.035	1.055	1.06	1.07	1.06	1.055	1.025	1.015	1.005	1.015	0.995	0.99	0.985	0.98	0.98	0.98	0.98	0.97	0.955	0.945	0.965	0.97	0.975	0.99	0.99	0.99	0.99	0.98	0.975	0.97	0.985	0.985	1	0.99	0.98	0.99	0.97	0.985
MISLOC	1	0.965	0.95	0.94	0.95	0.97	0.97	0.98	0.985	1	1.01	1.02	1.01	1.01	1.015	1.02	1.02	1.02	1.01	1	0.995	1	0.995	1.015	1.02	1.015	1.03	1.045	1.04	1.03	1.025	1.03	1.01	1.005	0.995	0.98	0.985	0.995	1.03	1.035	1.03	1.025	1.02	1.02	1.015	1.025	1.045	1.07	1.08
MKI67IP	1	1.06	1.1	1.1	1.1	1.11	1.12	1.14	1.16	1.15	1.13	1.11	1.08	1.09	1.1	1.09	1.09	1.08	1.08	1.08	1.08	1.09	1.1	1.09	1.1	1.1	1.1	1.1	1.08	1.08	1.09	1.09	1.08	1.08	1.07	1.08	1.07	1.07	1.06	1.06	1.06	1.07	1.07	1.07	1.07	1.07	1.06	1.06	1.05
MLLT4	1	0.99	0.96	0.97	1	1.02	1.03	1.015	1.01	0.985	0.99	0.995	1.02	1.025	1.035	1.055	1.09	1.12	1.095	1.09	1.095	1.115	1.135	1.135	1.115	1.125	1.12	1.125	1.13	1.115	1.1	1.1	1.115	1.11	1.125	1.165	1.15	1.11	1.105	1.1	1.11	1.165	1.165	1.135	1.125	1.125	1.115	1.135	1.13
MRTO4	1	1	0.99	1.01	1.02	1.09	1.13	1.11	1.12	1.16	1.05	1.13	1.15	1.15	1.11	1.07	1.07	1.11	1.13	1.17	1.19	1.23	1.22	1.14	1.13	1.12	1.13	1.13	1.12	1.12	1.09	1.1	1.1	1.13	1.18	1.21	1.21	1.19	1.18	1.1	1.1	1.3	1.28	1.3	1.3	1.31	1.31	1.31	1.34
MSRA	1	0.99	0.98	0.96	1.07	1.13	1.17	1.21	1.24	1.25	1.24	1.27	1.32	1.36	1.38	1.37	1.36	1.34	1.33	1.34	1.32	1.39	1.42	1.42	1.4	1.42	1.43	1.41	1.41	1.4	1.41	1.32	1.31	1.32	1.32	1.29	1.3	1.29	1.29	1.29	1.29	1.27	1.24	1.24	1.25	1.3	1.26	1.28	1.29
MYH9	1	0.945	0.895	0.89	0.885	0.905	0.955	1	1.015	1.025	1.015	1	1	1	1.015	1.015	1.025	1.02	1.01	1.02	1.03	1.03	1.02	1	0.995	0.985	0.935	0.94	0.94	0.94	0.935	0.935	0.92	0.905	0.885	0.89	0.885	0.9	0.89	0.895	0.88	0.885	0.87	0.88	0.875	0.865	0.86	0.87	0.9
MYLE	1	0.97	0.96	0.98	1.03	1.11	1.13	1.1	1.04	1.01	0.97	0.99	1.02	1.04	1.07	1.08	1.09	1.1	1.11	1.11	1.12	1.16	1.19	1.12	1.1	1.11	1.14	1.15	1.14	1.17	1.27	1.33	1.3	1.29	1.23	1.21	1.25	1.22	1.23	1.25	1.26	1.28	1.25	1.24	1.24	1.22	1.21	1.2	1.14
N68399	1	1.04	1.07	1.06	1.05	1.08	1.1	1.11	1.13	1.15	1.15	1.2	1.21	1.14	1.18	1.15	1.08	1.05	1.03	1.08	1.12	1.14	1.2	1.31	1.43	1.49	1.42	1.28	1.29	1.4	1.44	1.46	1.51	1.54	1.52	1.49	1.46	1.46	1.46	1.43	1.4	1.4	1.45	1.39	1.37	1.36	1.32	1.32	1.36
NASP	1	1.075	1.12	1.125	1.09	1.09	1.07	1.075	1.045	1.04	1.015	1.02	1.04	1.045	1.045	1.045	1.055	1.05	1.05	1.05	1.05	1.015	1.01	1.015	1	0.99	1.005	0.995	1.005	1.005	1	1	1.005	1	1.025	1.04	1.025	1.02	1.035	1.04	1.055	1.045	1.03	1.005	0.995	0.98	0.965	0.93	0.93
NCL	1	1.07	1.104	1.09	1.058	1.028	0.978	0.962	0.958	0.96	0.954	0.946	0.934	0.932	0.932	0.934	0.926	0.918	0.906	0.904	0.904	0.904	0.902	0.9	0.918	0.924	0.928	0.932	0.934	0.944	0.946	0.948	0.93	0.93	0.926	0.926	0.924	0.92	0.918	0.91	0.906	0.892	0.924	0.926	0.922	0.908	0.902	0.898	0.906
NDUFAF2	1	0.99333	0.99667	1.01333	1.02	1.00667	0.98667	0.94667	0.94	0.95	0.95333	0.95333	0.94333	0.92667	0.92667	0.93	0.92333	0.94	0.94333	0.94	0.93333	0.94333	0.94333	0.94333	0.95333	0.95333	0.96	0.93333	0.93	0.96333	0.97333	0.98333	1.03333	1.06	1.05333	1.07	1.07	1.06333	1.04667	1.03333	1.02	0.99333	0.98	0.97	0.96333	0.95667	0.96333	0.97667	0.97333
NDUFB11	1	1.03667	1.05	1.08	1.03667	1.00667	0.96667	0.95333	0.93333	0.91667	0.88	0.86	0.85667	0.87667	0.90667	0.90333	0.92333	0.93333	0.90667	0.88333	0.87667	0.85	0.84333	0.84333	0.89	0.90333	0.88333	0.86333	0.84667	0.81333	0.81	0.84	0.86	0.88333	0.89333	0.89667	0.92333	0.92	0.93333	0.94333	0.97333	0.99	1.01	0.98667	0.94667	0.94333	0.94667	0.9	0.92333
NDUFB8	1	1.045	1.055	1.045	1.025	1.015	1.02	1.05	1.03	1.02	1.015	1.025	1.06	1.045	1.03	1.025	1.03	1.03	1.015	1	1.005	1	1	1.005	0.99	0.975	0.985	0.985	0.995	0.995	1.01	1.03	1.02	1.01	0.98	0.995	0.995	1.025	1.005	1.015	0.98	0.985	0.975	0.96	0.975	0.965	0.965	0.975	0.975
NEXN	1	0.99	0.98	0.98	1.01	1.04	1.03	1.03	1.04	1.04	1.03	1.02	1.01	1.01	1.01	1.02	1.01	1	1	1	1.01	1.02	1.02	1	1	0.99	0.99	0.99	0.99	1	0.98	1	1.03	1.03	1.02	1.03	1.04	1.04	1.03	1.03	1.05	1.02	1	1	1.01	1	1.01	1.01	1.02
NGRN	1	1.08	1.14	1.14	1.13	1.11	1.08	1.04	1.01	1	0.97	0.96	0.94	0.92	0.9	0.88	0.89	0.88	0.88	0.87	0.88	0.88	0.86	0.85	0.85	0.84	0.85	0.84	0.84	0.84	0.84	0.84	0.85	0.84	0.84	0.84	0.84	0.84	0.84	0.85	0.85	0.85	0.86	0.84	0.84	0.84	0.85	0.84	0.85
NHP2L1	1	1.045	1.045	1.03	0.97	0.94	0.915	0.9	0.88	0.87	0.875	0.85	0.85	0.87	0.875	0.875	0.865	0.86	0.85	0.86	0.825	0.815	0.805	0.795	0.79	0.78	0.78	0.795	0.81	0.815	0.83	0.84	0.845	0.84	0.82	0.81	0.805	0.81	0.815	0.81	0.8	0.84	0.84	0.825	0.825	0.78	0.785	0.79	0.785
NM	1	1.05	1.11	1.12	1.13	1.11	1.11	1.14	1.15	1.16	1.16	1.19	1.19	1.18	1.16	1.16	1.17	1.15	1.13	1.13	1.13	1.13	1.1	1.1	1.13	1.14	1.16	1.17	1.14	1.13	1.14	1.14	1.15	1.14	1.12	1.09	1.08	1.07	1.08	1.08	1.09	1.09	1.09	1.09	1.09	1.08	1.07	1.06	1.04
NME1-NME2	1	1.05	1.12	1.11	1.14	1.3	1.26	1.22	1.17	1.13	1.13	1.13	1.13	1.13	1.17	1.19	1.29	1.3	1.35	1.38	1.48	1.55	1.48	1.57	1.54	1.54	1.38	1.39	1.31	1.34	1.37	1.38	1.38	1.31	1.28	1.27	1.28	1.31	1.32	1.22	1.21	1.12	1.12	1.13	1.07	1.14	1.26	1.12	1.17
NME2	1	1.01	1.04	1.05	1.04	1.02	1.03	1.02	1	0.97	0.94	0.94	0.93	0.91	0.92	0.92	0.9	0.9	0.9	0.91	0.92	0.87	0.88	0.94	0.96	0.97	0.99	0.99	0.98	0.97	0.92	0.9	0.92	0.91	0.89	0.91	0.91	0.92	0.92	0.97	0.99	1	0.98	0.97	1.01	1	0.99	0.99	0.99
NME4	1	0.99	0.96	0.96	0.99	1	1	1.02	1	0.99	1	0.99	1.01	1	1	1.01	1.03	1.06	1.07	1.08	1.1	1.13	1.1	1.09	1.09	1.1	1.09	1.11	1.11	1.05	1.06	1.08	1.12	1.12	1.09	1.09	1.15	1.19	1.2	1.18	1.16	1.17	1.13	1.12	1.16	1.18	1.03	1.04	1.13
NMT1	1	1.04	1.04	1.09	1.02	0.97	0.93	0.91	0.9	0.88	0.88	0.87	0.86	0.87	0.86	0.84	0.83	0.83	0.85	0.84	0.86	0.85	0.86	0.87	0.88	0.88	0.88	0.88	0.9	0.89	0.88	0.89	0.88	0.89	0.9	0.91	0.87	0.87	0.86	0.86	0.88	0.88	0.85	0.84	0.84	0.86	0.87	0.86	0.84
NOL7	1	0.99	1.03	1.1	1.02	0.97	0.88	0.79	0.54	0.6	0.74	0.85	0.93	0.89	0.88	0.89	0.9	0.74	0.7	0.74	0.71	0.69	0.72	0.73	0.68	0.81	0.73	0.59	0.63	0.71	0.8	0.74	0.73	0.76	0.85	0.74	0.71	0.7	0.84	0.83	0.82	0.78	0.83	0.86	0.87	0.77	0.67	0.76	0.82
NPF3	1	0.845	0.715	0.71	0.67	0.66	0.675	0.725	0.735	0.725	0.725	0.77	0.83	0.8	0.77	0.765	0.795	0.81	0.815	0.86	0.86	0.885	0.895	0.86	0.84	0.89	0.865	0.86	0.81	0.8	0.805	0.82	0.785	0.81	0.835	0.895	0.915	0.93	0.935	0.905	0.89	0.885	0.83	0.825	0.87	0.845	0.91	0.91	0.905
NPM1	1	1.12556	1.12556	1.04556	0.93778	0.87778	0.84111	0.83	0.81222	0.80889	0.80222	0.80333	0.80778	0.81222	0.81	0.80222	0.79	0.78778	0.78	0.78667	0.78778	0.79333	0.78444	0.77889	0.78	0.78556	0.78556	0.78667	0.78778	0.79	0.78556	0.78778	0.78111	0.78	0.79222	0.79	0.78556	0.78556	0.78	0.77444	0.78111	0.79222	0.78667	0.77778	0.77222	0.77	0.76778	0.75333	0.74556
NQO1	1	0.93	0.89	0.89	0.94	1.01	1.04	1.01	0.99	0.98	0.98	1	1.02	1.03	1.05	1.12	1.08	1.08	1.07	1.02	1.03	1.05	1.05	1.02	1.01	1.03	0.95	0.96	0.97	0.95	0.92	0.92	0.95	1	0.98	1	1	0.97	1.03	1.04	1.02	1.02	1	0.99	0.98	0.99	1.02	1.03	1.03
NSEP1	1	0.93	0.84	0.85	0.83	0.86	0.9	0.92	0.91	0.94	0.95	0.95	0.95	0.97	0.97	0.96	0.97	0.98	0.98	0.95	0.97	0.98	0.96	0.95	0.98	0.97	0.96	0.93	0.94	0.96	0.97	1	1	1	1.01	1	1	1.06	1.08	1.12	1.12	1.13	1.13	1.13	1.14	1.15	1.13	1.14	1.13
NT	1	0.93	0.845	0.865	0.875	0.85	0.84	0.825	0.83	0.84	0.88	0.885	0.92	0.945	0.935	0.97	0.995	0.995	0.985	0.985	0.98	0.965	0.96	0.93	0.92	0.905	0.9	0.875	0.87	0.88	0.875	0.875	0.875	0.875	0.875	0.865	0.905	0.915	0.975	0.99	0.96	0.95	0.97	0.93	0.9	0.93	0.88	0.875	0.88
NTAN1	1	1.05	1.11	1.11	1.14	1.16	1.16	1.15	1.14	1.14	1.15	1.13	1.11	1.12	1.12	1.11	1.11	1.1	1.1	1.09	1.08	1.1	1.09	1.09	1.1	1.1	1.1	1.12	1.12	1.13	1.12	1.11	1.1	1.08	1.06	1.06	1.06	1.07	1.06	1.07	1.07	1.06	1.07	1.08	1.08	1.08	1.07	1.06	1.06
NUCKS1	1	1.07	1.135	1.14	1.075	1.015	0.96	0.935	0.935	0.935	0.93	0.92	0.91	0.905	0.895	0.885	0.905	0.895	0.9	0.9	0.885	0.89	0.895	0.89	0.885	0.89	0.9	0.91	0.91	0.9	0.905	0.905	0.9	0.905	0.905	0.915	0.915	0.92	0.93	0.94	0.935	0.92	0.915	0.92	0.915	0.895	0.895	0.875	0.87
NUDCD1	1	0.99	1.03	1.02	1.07	1.1	1.05	1.04	1.01	1.03	1.09	1.14	1.15	1.12	1.12	1.12	1.17	1.2	1.24	1.25	1.21	1.16	1.12	1.09	1.15	1.15	1.18	1.19	1.21	1.25	1.27	1.28	1.31	1.3	1.31	1.32	1.31	1.3	1.28	1.21	1.19	1.18	1.16	1.14	1.15	1.15	1.13	1.13	1.16
NUDCD2	1	1.02	1.02	0.99	0.99	1.02	1.04	1.04	1.05	1.02	1	1	1	1.01	1.02	1.03	0.99	0.96	0.94	0.92	0.94	0.96	0.95	0.95	0.97	1.09	1.13	1.13	1.12	1.11	1.09	1.09	1.08	1.07	1.05	1.05	1.04	1.05	1.06	1.09	1.09	1.05	1.05	1.02	1	0.99	1.03	1.04	1.04
NUDT3	1	1.01	1.02	1.03	1.04	1.03	1.03	1.01	0.98	0.96	0.95	0.97	0.98	1	1	0.99	0.95	0.94	0.93	0.93	0.92	0.91	0.9	0.91	0.95	0.94	0.93	0.93	0.95	0.95	0.93	0.89	0.89	0.9	0.9	0.89	0.87	0.86	0.86	0.85	0.85	0.87	0.86	0.86	0.85	0.85	0.84	0.91	0.91
PABPN1	1	0.95	0.92	0.96	0.96	0.98	0.99	1	0.98	0.97	1.01	1.03	1.07	1.11	1.17	1.19	1.2	1.17	1.17	1.14	1.13	1.13	1.13	1.14	1.16	1.15	1.13	1.12	1.11	1.13	1.19	1.22	1.25	1.25	1.27	1.25	1.26	1.23	1.21	1.26	1.26	1.27	1.25	1.24	1.26	1.31	1.31	1.3	1.31
PAGE1	1	0.96	0.93	0.93	1	1	1	0.99	0.97	0.98	0.97	0.96	0.95	0.93	0.95	0.98	0.98	0.97	0.97	0.99	1	1	0.98	1	1.07	1.04	1.02	0.99	0.99	0.99	1.01	1.01	1	1	1.02	1.01	1.01	0.98	0.96	0.94	0.94	0.93	0.89	0.89	0.93	0.94	0.94	0.95	0.98
PAWR	1	1.04	1.06	1.08	1.07	1.08	1.09	1.1	1.11	1.1	1.1	1.1	1.1	1.09	1.08	1.07	1.07	1.05	1.04	1.02	1.02	1.03	1.05	1.07	1.09	1.08	1.1	1.08	1.07	1.06	1.07	1.07	1.1	1.1	1.1	1.1	1.09	1.09	1.08	1.08	1.08	1.07	1.11	1.1	1.1	1.07	1.08	1.09	1.09
PCBD1	1	1.02	1.04	1.02	1.07	1.09	1.12	1.13	1.14	1.13	1.12	1.1	1.09	1.07	1.05	1.06	1.06	1.04	1.03	1.03	1.05	1.05	1.03	1.03	1.03	1.04	1.04	1.04	1.06	1.06	1.06	1.06	1.05	1.04	1.04	1.05	1.05	1.05	1.07	1.03	1.03	1.03	1.08	1.09	1.08	1.08	1.08	1.07	1.07
PCMTD2	1	0.84	0.72	0.74	0.79	0.83	0.89	0.94	0.99	1.02	1.03	1	0.96	0.98	0.97	0.96	0.99	1.04	1.09	1.11	1.14	1.18	1.17	1.17	1.19	1.22	1.2	1.26	1.27	1.31	1.31	1.36	1.36	1.36	1.37	1.38	1.37	1.35	1.34	1.4	1.41	1.4	1.43	1.44	1.5	1.5	1.49	1.46	1.43
PDCD5	1	0.99	1.02	1.045	1.05	1.065	1.06	1.07	1.065	1.075	1.09	1.085	1.08	1.085	1.065	1.06	1.055	1.055	1.06	1.07	1.065	1.065	1.075	1.095	1.095	1.075	1.065	1.065	1.06	1.065	1.085	1.08	1.085	1.085	1.08	1.065	1.06	1.08	1.115	1.115	1.12	1.115	1.1	1.09	1.09	1.105	1.12	1.115	1.115
PDIA5	1	1.04	1.07	1.05	1.07	1.08	1.11	1.19	1.24	1.29	1.32	1.31	1.31	1.32	1.32	1.31	1.28	1.24	1.25	1.19	1.19	1.18	1.18	1.18	1.17	1.16	1.17	1.17	1.17	1.17	1.17	1.17	1.18	1.18	1.17	1.15	1.16	1.17	1.16	1.19	1.17	1.15	1.14	1.14	1.15	1.14	1.11	1.09	1.09
PDLIM5	1	1.13	1.15	1.07	0.96	0.82	0.74	0.7	0.68	0.66	0.65	0.65	0.66	0.68	0.68	0.68	0.68	0.7	0.67	0.68	0.68	0.67	0.67	0.67	0.67	0.67	0.67	0.67	0.67	0.66	0.65	0.64	0.66	0.67	0.67	0.67	0.65	0.66	0.66	0.67	0.67	0.65	0.66	0.68	0.67	0.65	0.65	0.65	0.64
PEPP-2	1	1.015	1.055	1.045	1.06	1.075	1.085	1.11	1.13	1.135	1.15	1.155	1.16	1.16	1.16	1.16	1.15	1.16	1.17	1.18	1.165	1.175	1.18	1.205	1.2	1.205	1.215	1.23	1.215	1.205	1.195	1.185	1.19	1.195	1.215	1.235	1.22	1.225	1.23	1.235	1.245	1.25	1.245	1.235	1.245	1.21	1.22	1.215	1.21
PFDN5	1	1	1.04667	1.07	1.07667	1.07333	1.07333	1.1	1.11	1.13	1.14	1.15	1.13333	1.12667	1.13667	1.15333	1.14	1.15	1.15333	1.16333	1.17333	1.17	1.17	1.17333	1.17333	1.16667	1.19333	1.17	1.15333	1.13333	1.13333	1.13667	1.09667	1.08333	1.08333	1.06333	1.05667	1.07	1.04333	1.03667	1.04	1.04333	1.03333	1.04333	1.03333	1.02667	1.04	1.04333	1.04333
PFN1	1	1.02	1.04	1.04	1.07	1.09	1.12	1.12	1.11	1.09	1.09	1.08	1.06	1.07	1.07	1.06	1.03	1.02	1.01	1.03	1.05	1.07	1.07	1.07	1.07	1.06	1.07	1.06	1.06	1.06	1.07	1.05	1.06	1.06	1.07	1.06	1.04	1.04	1.03	1.02	1.02	1.03	1.05	1.06	1.06	1.05	1.04	1.07	1.07
PIN4	1	1.08	1.14	1.12	1.11	1.12	1.12	1.12	1.12	1.13	1.16	1.17	1.19	1.22	1.21	1.2	1.15	1.14	1.14	1.14	1.14	1.16	1.16	1.16	1.17	1.16	1.15	1.16	1.15	1.13	1.12	1.12	1.12	1.12	1.14	1.12	1.14	1.09	1.09	1.14	1.13	1.13	1.14	1.12	1.1	1.1	1.1	1.1	1.11
PLEC1	1	0.93	0.88	0.88667	0.90667	0.96	0.99667	1.01333	1.02	1.02667	1.02667	1.01	1.00333	1.03	1.02667	1.02333	1.01667	1.01	1.05333	1.04	1.03667	1.05667	1.08667	1.12667	1.13333	1.16	1.15667	1.14667	1.15667	1.16	1.18333	1.18	1.16667	1.14	1.13667	1.13667	1.16	1.19333	1.22667	1.23333	1.22333	1.21333	1.2	1.17667	1.16333	1.15	1.14	1.12667	1.14333
PLS3	1	0.99	1.02	1.04	1.09	1.13	1.15	1.19	1.22	1.22	1.25	1.29	1.31	1.3	1.25	1.22	1.21	1.24	1.22	1.23	1.24	1.21	1.21	1.22	1.28	1.3	1.32	1.3	1.3	1.32	1.29	1.29	1.29	1.27	1.26	1.21	1.19	1.15	1.15	1.14	1.13	1.12	1.14	1.16	1.17	1.17	1.14	1.15	1.17
PNN	1	1.09	1.15	1.2	1.16	1.1	1.05	1.04	1.02	1	0.98	0.97	0.98	0.97	0.98	0.98	0.99	1	1.01	1	1	1	0.99	0.98	0.98	0.96	0.95	0.93	0.93	0.94	0.93	0.92	0.92	0.92	0.92	0.92	0.94	0.94	0.91	0.92	0.91	0.91	0.91	0.92	0.9	0.89	0.89	0.89	0.9
POLR1D	1	0.935	0.955	0.975	1	0.975	0.96	0.95	1.005	1.02	1.01	1.055	1.065	1.03	1.02	1.005	1.04	1.09	1.08	1.165	1.145	1.165	1.115	1.135	1.15	1.17	1.125	1.1	1.025	0.975	1	1.025	1.075	1.01	1.005	1	1.015	1.015	0.985	0.96	0.945	1.015	1.08	1.1	1.045	1.01	0.99	1.01	1.06
POLR2F	1	1.015	1.055	1.085	1.055	1.04	1.05	1.06	1.055	1.05	1.035	1.035	1.06	1.065	1.065	1.055	1.045	1.03	1.04	1.065	1.065	1.06	1.05	1.06	1.065	1.055	1.085	1.065	1.065	1.055	1.05	1.085	1.095	1.085	1.065	1.085	1.095	1.08	1.085	1.085	1.105	1.05	1.05	1.075	1.08	1.07	1.065	1.015	1.025
POLR2G	1	0.97333	0.89667	0.9	0.92333	0.94667	0.97	0.98667	1.00333	1.00333	1.04	1.03667	1.02667	1.02667	1.02333	1.04667	1.04667	1.08	1.09	1.09	1.1	1.11	1.13667	1.11333	1.10333	1.07	1.06667	1.05667	1.07	1.08333	1.09333	1.15	1.15667	1.15	1.15	1.15	1.10667	1.13667	1.13667	1.15333	1.13333	1.16667	1.18667	1.16333	1.15	1.15667	1.12333	1.13	1.15
POLR2L	1	1	1.04	1.04	0.96	0.95	0.98	1	1	1.01	0.98	0.96	0.95	0.93	0.9	0.89	0.89	0.89	0.86	0.89	0.9	0.97	0.97	0.97	0.98	0.97	0.95	0.96	0.96	0.97	0.97	0.96	0.94	0.94	0.93	0.91	0.9	0.91	0.9	0.89	0.91	0.89	0.87	0.86	0.87	0.88	0.88	0.86	0.85
POLR3GL	1	1.05	1	0.85	0.8	0.76	0.75	0.72	0.74	0.76	0.76	0.77	0.77	0.78	0.77	0.78	0.78	0.79	0.79	0.77	0.77	0.78	0.78	0.78	0.77	0.77	0.77	0.76	0.76	0.77	0.77	0.77	0.77	0.77	0.77	0.76	0.76	0.76	0.77	0.78	0.79	0.78	0.77	0.77	0.77	0.77	0.77	0.78	0.77
POMP	1	0.99	1.03	1.05	1.035	1.04	1.025	0.995	0.975	0.97	0.985	0.985	0.975	0.975	0.94	0.965	0.975	0.985	0.985	0.975	0.955	0.955	0.955	0.95	0.935	0.95	0.95	0.93	0.92	0.92	0.955	0.95	0.9	0.89	0.87	0.9	0.915	0.97	0.98	1.01	1.06	1.12	1.085	1.085	1.095	1.12	1.11	1.09	1.075
PPIA	1	0.9675	0.9725	0.9775	1.0125	1.0325	1.0525	1.09	1.1	1.1175	1.1	1.0975	1.085	1.09	1.115	1.12	1.1375	1.16	1.16	1.1425	1.1325	1.1325	1.13	1.115	1.0925	1.095	1.0875	1.0825	1.0825	1.0875	1.09	1.0975	1.1	1.1	1.1025	1.1125	1.115	1.12	1.1225	1.1325	1.1275	1.125	1.125	1.1225	1.1275	1.135	1.15	1.1425	1.1375
PPIAB6	1	0.9	0.95	1	1	1.02	1.08	1.01	1	0.98	0.97	0.93	0.96	1.01	1.07	1.09	1.08	1.05	1.01	0.94	0.92	0.93	0.94	0.97	0.98	1.01	1.07	1.08	1.05	1.11	1.15	1.16	1.12	1.17	1.2	1.22	1.04	0.97	0.98	0.99	0.99	1.01	1.03	1.05	1.06	1.13	1.16	1.15	1.14
PPP1R14B	1	1.05	1.09	1.09	1.1	1.11	1.12	1.1	1.08	1.08	1.08	1.1	1.1	1.09	1.09	1.11	1.11	1.11	1.11	1.08	1.08	1.1	1.1	1.11	1.09	1.08	1.08	1.07	1.06	1.06	1.05	1.04	1.02	1.03	1.04	1.05	1.06	1.06	1.05	1.06	1.04	1.04	1.04	1.04	1.06	1.08	1.07	1.07	1.06
PRC1	1	1.03	1.00667	0.93833	0.89333	0.875	0.86167	0.85833	0.85333	0.85667	0.85667	0.84833	0.85167	0.84667	0.84667	0.83667	0.83167	0.825	0.81667	0.81333	0.81	0.81167	0.81667	0.81667	0.81333	0.81333	0.81333	0.80833	0.80833	0.81	0.80667	0.80667	0.81167	0.81167	0.81167	0.815	0.81667	0.82	0.83	0.835	0.83333	0.84	0.84	0.84333	0.84667	0.84167	0.83667	0.84333	0.85
PRDX5	1	0.94	0.93	0.925	1.005	1.01	1.01	1.005	0.98	0.96	0.935	0.945	0.955	0.99	1	1.015	1.06	1.03	1.015	0.99	0.985	0.995	0.995	1.01	0.985	0.96	0.96	0.96	0.945	0.955	0.995	1.035	1.04	1.045	1.05	1.035	1.045	1.055	1.08	1.065	1.07	1.095	1.125	1.11	1.11	1.08	1.04	1.03	1.02
PREPL	1	0.93	0.84	0.86	0.85	0.93	0.95	0.91	0.89	0.93	0.94	0.96	1.01	1.11	1.19	1.26	1.24	1.19	1.21	1.12	1.11	1.06	1.04	1.09	1.03	0.97	1.02	1.08	1.14	1.12	1.17	1.25	1.27	1.29	1.34	1.36	1.22	1.1	1.07	1.08	1.1	1.05	1	0.99	1	0.98	0.95	0.94	0.96
PRKCBP1	1	0.95	0.94	0.95	0.96	0.98	1.04	1.13	1.16	1.19	1.19	1.2	1.16	1.15	1.15	1.17	1.15	1.16	1.2	1.2	1.22	1.2	1.21	1.2	1.23	1.16	1.09	1.11	1.05	1.14	1.16	1.14	1.18	1.19	1.17	1.21	1.22	1.27	1.28	1.32	1.34	1.29	1.25	1.2	1.2	1.2	1.21	1.21	1.26
PRPF31	1	0.97	0.83	0.71	0.72	0.71	0.72	0.75	0.8	0.8	0.67	0.67	0.67	0.66	0.65	0.64	0.65	0.67	0.68	0.65	0.64	0.65	0.65	0.65	0.63	0.62	0.64	0.64	0.63	0.66	0.68	0.71	0.71	0.7	0.72	0.73	0.72	0.71	0.72	0.72	0.7	0.69	0.69	0.68	0.69	0.66	0.66	0.67	0.68
PRR13	1	0.93	0.83	0.83	0.84	0.87	0.91	0.94	0.95	0.97	1.01	1.02	1.01	0.99	0.97	0.97	0.97	0.98	0.98	1.01	1.03	1.05	1.03	1.02	1	0.99	0.98	1	1.01	1.02	1.03	1.05	1.08	1.1	1.11	1.11	1.09	1.07	1.06	1.08	1.08	1.09	1.09	1.08	1.06	1.09	1.11	1.1	1.09
PSMA1	1	0.93667	0.9	0.90333	0.95667	1	1.05667	1.08	1.10667	1.13667	1.14	1.12333	1.13667	1.14667	1.14333	1.12333	1.1	1.12	1.15	1.14333	1.17667	1.21	1.21	1.23333	1.27333	1.30667	1.29667	1.3	1.28667	1.25667	1.23333	1.18333	1.17333	1.15667	1.16333	1.19667	1.23	1.26333	1.26333	1.27333	1.28	1.28	1.32333	1.30333	1.25333	1.25333	1.23333	1.25	1.21
PSMA3	1	0.97	0.98	1	1.03	1	1.01	1.03	1.07	1.06	1.07	1.06	1.05	1.03	1.02	1.02	1.12	1.13	1.19	1.21	1.23	1.22	1.2	1.18	1.17	1.17	1.17	1.2	1.24	1.25	1.26	1.24	1.21	1.19	1.18	1.18	1.17	1.15	1.14	1.14	1.13	1.12	1.1	1.08	1.05	1.04	1.03	1.03	1.04
PSMA7	1	0.935	0.9	0.91	0.94	0.99	1.005	0.965	0.97	0.965	0.975	0.99	1.065	1.08	1.09	1.11	1.02	1.015	1.035	1.01	0.97	0.965	0.985	0.99	0.985	0.99	1	0.98	1	1.02	1.035	1.085	1.085	1.205	1.175	1.23	1.205	1.215	1.185	1.165	1.135	1.135	1.18	1.235	1.215	1.22	1.17	1.12	1.12
PSMB1	1	0.96	0.94	0.905	0.925	0.95	0.945	0.935	0.93	0.965	1.02	1.05	1.08	1.095	1.07	1.105	1.135	1.125	1.12	1.145	1.155	1.185	1.21	1.205	1.2	1.165	1.17	1.165	1.16	1.175	1.17	1.165	1.2	1.175	1.115	1.095	1.065	1.11	1.175	1.16	1.16	1.17	1.23	1.225	1.19	1.215	1.185	1.185	1.14
PSMB4	1	0.97	0.995	1.01	1.05	1.07	1.075	1.085	1.07	1.03	1.005	0.99	0.985	1.005	1	0.995	1	1.03	1.03	1.02	1	1.025	1.02	1.035	1.045	1.015	1	1	1	0.985	0.98	0.98	0.985	0.995	0.99	0.985	0.975	0.96	0.95	0.955	0.955	0.97	0.965	0.96	0.96	0.925	0.94	0.96	0.96
PSMB6	1	0.91667	0.89667	0.93667	0.95333	0.94667	0.97667	1.04333	1.06667	1.12	1.16	1.15333	1.12667	1.17333	1.22	1.23333	1.25667	1.29	1.31667	1.32333	1.32333	1.23333	1.24667	1.27667	1.26667	1.24667	1.25333	1.22	1.19667	1.19333	1.21333	1.22333	1.22667	1.23333	1.23	1.22333	1.22	1.24667	1.27667	1.25333	1.24667	1.23333	1.19667	1.15	1.11667	1.10667	1.06667	1.07333	1.09333
PSMB7	1	1	1.05	0.98	0.97	0.98	0.97	0.95	0.92	0.91	0.89	0.88	0.88	0.92	0.93	0.92	0.93	0.95	0.96	0.99	0.98	1.01	1.03	1.04	0.99	0.98	1.06	1.08	1.09	1.08	1.04	0.99	0.98	1.04	1.05	1.05	1.01	0.96	0.95	0.87	0.89	0.91	0.9	0.87	0.86	0.85	0.87	0.9	0.94
PSMC1	1	1.01	1.07	1.02	1.13	1.155	1.105	1.08	1.085	1.08	1.06	1.02	1.005	0.98	1.03	1.055	1.005	1.01	0.99	1.015	1.035	1.06	1.035	1.045	1.065	1.055	1.075	1.035	1.005	1.02	1.04	1.045	1.03	0.98	0.96	0.96	0.945	0.905	0.9	0.915	0.94	0.93	0.935	0.98	1.025	1.07	1.135	1.145	1.11
PSMC4	1	0.905	0.875	0.91	0.93	0.95	0.995	1	0.96	0.905	0.875	0.865	0.86	0.82	0.815	0.8	0.865	0.91	0.9	0.9	0.885	0.88	0.89	0.9	0.93	0.95	0.965	0.985	0.965	0.895	0.895	0.89	0.875	0.87	0.845	0.855	0.885	0.86	0.875	0.835	0.825	0.84	0.845	0.865	0.9	0.9	1.025	1.13	1.12
PSMD12	1	0.93	0.865	0.89	0.87	0.865	0.845	0.835	0.835	0.84	0.835	0.815	0.825	0.84	0.84	0.825	0.835	0.83	0.815	0.815	0.82	0.825	0.825	0.83	0.825	0.83	0.83	0.835	0.835	0.8	0.81	0.81	0.825	0.825	0.83	0.825	0.825	0.83	0.845	0.855	0.835	0.845	0.855	0.845	0.86	0.865	0.86	0.87	0.87
PSMD6	1	1.03	1.05	1.07	1.13	1.19	1.23	1.24	1.26	1.27	1.22	1.22	1.27	1.27	1.27	1.23	1.23	1.21	1.14	1.13	1.17	1.16	1.17	1.16	1.15	1.16	1.17	1.2	1.21	1.23	1.26	1.28	1.26	1.26	1.25	1.3	1.32	1.33	1.31	1.31	1.34	1.35	1.36	1.31	1.25	1.25	1.23	1.14	1.12
PSMF1	1	0.95	0.91	0.91	0.92	0.94	0.98	1.02	1.05	1.07	1.07	1.07	1.08	1.09	1.08	1.11	1.11	1.13	1.13	1.17	1.19	1.15	1.16	1.14	1.08	1.07	1.06	1.08	1.04	1.01	1.03	1.03	1.02	1.01	0.98	0.99	0.99	0.99	0.97	0.97	0.93	0.93	0.94	0.94	0.92	0.97	1.01	1.01	1
PSPC1	1	1.15	1.16	1.02	0.95	0.88	0.83	0.82	0.82	0.81	0.8	0.8	0.8	0.78	0.8	0.79	0.77	0.78	0.77	0.76	0.75	0.77	0.77	0.76	0.74	0.74	0.72	0.71	0.71	0.71	0.72	0.71	0.72	0.72	0.73	0.71	0.72	0.72	0.75	0.75	0.73	0.73	0.75	0.75	0.72	0.69	0.68	0.67	0.66
PTPN1	1	0.98	0.99	1.005	0.965	0.98	0.98	0.985	1.005	1.01	1.025	1.015	1.005	0.965	0.965	0.995	1.035	1.055	1.09	1.075	1.065	1.045	1.05	1.035	1.045	1.01	1.045	1.065	1.035	1.03	1.015	0.995	0.975	0.955	0.955	0.94	0.935	0.93	0.925	0.915	0.92	0.91	0.885	0.885	0.895	0.9	0.885	0.89	0.885
PTTG1IP	1	1.02	1.08	0.99	0.99	0.96	0.93	0.92	0.86	0.86	0.87	0.85	0.84	0.83	0.85	0.84	0.84	0.83	0.83	0.83	0.83	0.83	0.84	0.84	0.84	0.87	0.86	0.85	0.84	0.85	0.85	0.85	0.83	0.81	0.8	0.8	0.78	0.78	0.77	0.77	0.77	0.77	0.8	0.79	0.78	0.82	0.81	0.8	0.77
PWP1	1	0.9	0.83	0.86	0.92	0.93	0.93	0.95	0.99	1.03	1.03	1.03	1.02	1.06	1.09	1.13	1.14	1.11	1.11	1.13	1.13	1.12	1.2	1.21	1.3	1.3	1.27	1.19	1.24	1.25	1.26	1.25	1.32	1.31	1.29	1.33	1.3	1.27	1.3	1.3	1.27	1.25	1.26	1.25	1.24	1.24	1.24	1.21	1.2
PXK	1	1.04	1.07	1.08	1.26	1.32	1.34	1.3	1.28	1.31	1.29	1.28	1.3	1.29	1.28	1.24	1.25	1.23	1.22	1.18	1.16	1.14	1.13	1.11	1.13	1.14	1.12	1.11	1.1	1.09	1.08	1.16	1.17	1.14	1.13	1.14	1.12	1.12	1.15	1.17	1.2	1.2	1.18	1.2	1.19	1.23	1.23	1.24	1.23
RAB11A	1	1.09	1.15	1.13	1.15	1.13	1.13	1.13	1.16	1.18	1.23	1.24	1.25	1.25	1.25	1.25	1.25	1.25	1.22	1.22	1.22	1.19	1.18	1.2	1.2	1.21	1.22	1.23	1.21	1.21	1.22	1.24	1.24	1.23	1.24	1.24	1.23	1.21	1.2	1.21	1.23	1.23	1.23	1.22	1.21	1.2	1.23	1.2	1.2
RAB1A	1	0.94	0.95	0.96	1.02	1.08	1.1	1.05	1.02	0.99	0.98	0.95	0.94	0.94	0.94	0.95	0.98	1.01	1	1.04	1	0.97	0.99	0.99	1	1.07	1.06	1.13	1.13	1.15	1.13	1.16	1.17	1.11	1.06	1.01	1.01	1.01	0.87	0.87	0.87	0.9	1.02	0.99	1.03	1.04	1.06	1.03	1.01
RAB33A	1	0.95	0.91	0.92	0.94	0.98	1	1.07	1.13	1.15	1.15	1.17	1.16	1.17	1.16	1.13	1.11	1.17	1.23	1.34	1.23	1.22	1.22	1.24	1.29	1.28	1.27	1.24	1.23	1.22	1.3	1.31	1.28	1.38	1.36	1.36	1.45	1.48	1.43	1.44	1.45	1.43	1.47	1.45	1.43	1.45	1.44	1.43	1.4
RAC1	1	0.955	0.86	0.85	0.87	0.87	0.87	0.85	0.85	0.845	0.825	0.825	0.825	0.815	0.795	0.785	0.79	0.79	0.805	0.8	0.785	0.78	0.775	0.78	0.765	0.775	0.775	0.755	0.765	0.78	0.79	0.815	0.88	0.875	0.865	0.855	0.855	0.845	0.855	0.865	0.86	0.855	0.87	0.87	0.88	0.88	0.905	0.895	0.91
RACK1	1	0.97	0.93	0.95	1.02	1.01	1.01	0.99	1.02	1.04	1.01	0.99	1.01	1.03	1.04	1	0.97	0.98	0.98	0.99	0.97	0.98	1	1	1	1.01	1.03	1.02	1.07	1.09	1.07	1.09	1.12	1.14	1.18	1.17	1.16	1.18	1.21	1.19	1.15	1.15	1.16	1.22	1.26	1.24	1.19	1.18	1.12
RAD51AP1	1	0.87	0.79	0.83	0.9	0.93	0.99	1.04	1.1	1.11	1.08	1.08	1.06	1.03	1.01	1	1.02	1.02	1.04	1.02	1.04	1.1	1.1	1.1	1.14	1.14	1.15	1.14	1.14	1.14	1.12	1.09	1.23	1.25	1.24	1.19	1.18	1.12	1.14	1.11	1.08	1.13	1.15	1.15	1.13	1.11	1.16	1.19	1.23
RANBP1	1	1.04	1.16	1.14	1.15	1.14	1.14	1.13	1.09	1.05	1	1.01	1.01	0.93	0.95	0.96	0.97	0.92	0.94	0.91	0.91	0.96	0.96	0.92	0.95	1.01	1.03	1.09	1.07	1.07	1.06	0.97	0.98	1	0.99	1.03	1.14	1.13	1.09	1.04	1.07	1.07	1.06	1.09	1.12	1.13	1.16	1.15	1.16
RASIP1	1	1.18	1.14	1.11	1	0.93	0.88	0.87	0.88	0.87	0.85	0.84	0.84	0.85	0.84	0.83	0.84	0.85	0.85	0.84	0.84	0.84	0.83	0.83	0.81	0.81	0.82	0.83	0.82	0.82	0.81	0.81	0.81	0.8	0.8	0.8	0.83	0.84	0.82	0.78	0.78	0.77	0.78	0.77	0.75	0.75	0.75	0.74	0.73
RAVER1	1	1.04	1.06	1.03	1.01	1.04	1.03	1.03	1	0.96	0.93	0.92	0.91	0.91	0.9	0.89	0.89	0.88	0.86	0.87	0.87	0.87	0.84	0.8	0.79	0.77	0.77	0.78	0.78	0.81	0.81	0.84	0.84	0.83	0.89	0.88	0.86	0.86	0.85	0.83	0.82	0.83	0.9	0.9	0.88	0.87	0.89	0.87	0.87
RBM27	1	1.03	1.14	1.09	1.04	1.03	1.1	1.13	1.13	1.15	1.25	1.29	1.27	1.25	1.18	1.1	1.06	1.06	1.09	1.24	1.26	1.33	1.33	1.33	1.33	1.35	1.38	1.41	1.4	1.3	1.27	1.25	1.2	1.24	1.28	1.25	1.38	1.44	1.42	1.32	1.36	1.35	1.32	1.28	1.28	1.27	1.25	1.16	1.1
RBM8A	1	0.9	0.76	0.71	0.77	0.72	0.67	0.73	0.8	0.82	0.79	0.8	0.77	0.78	0.8	0.82	0.85	0.89	0.91	0.94	0.96	0.97	0.98	1.01	1.04	1.04	1.06	1.08	1.03	0.99	0.98	0.96	0.92	0.89	0.88	0.89	0.97	0.96	0.97	1.07	1.06	1.04	1.1	1.04	1.02	1.07	1.06	1.09	1.12
RBX1	1	1.04	1.08	1.04	1.05	1.05	1.04	1.04	1.05	1.07	1.07	1.07	1.07	1.08	1.09	1.09	1.09	1.08	1.05	1.05	1.06	1.08	1.09	1.09	1.1	1.11	1.11	1.13	1.13	1.11	1.11	1.13	1.12	1.09	1.09	1.07	1.07	1.07	1.06	1.07	1.07	1.09	1.07	1.07	1.07	1.08	1.08	1.09	1.1
RFC1	1	1.06	1.105	1.08	1.05	1.035	1.025	1.01	1.01	1.005	1	1	0.99	0.985	0.98	0.97	0.96	0.955	0.955	0.945	0.94	0.945	0.95	0.955	0.955	0.95	0.955	0.96	0.96	0.96	0.955	0.955	0.955	0.955	0.945	0.94	0.94	0.94	0.935	0.93	0.935	0.945	0.935	0.935	0.935	0.935	0.935	0.935	0.93
RGS10	1	1.07	1.09	1.05	1.19	1.23	1.2	1.08	0.99	1	1	0.92	0.96	0.97	0.97	0.97	0.91	0.9	0.87	0.83	0.81	0.84	0.84	0.83	0.85	0.87	0.88	0.91	0.92	0.8	0.78	0.78	0.77	0.78	0.81	0.77	0.77	0.76	0.76	0.79	0.79	0.79	0.78	0.76	0.77	0.78	0.73	0.71	0.7
RPA2	1	0.935	0.925	0.965	0.965	1.05	1.145	1.27	1.265	1.29	1.255	1.21	1.14	1.12	1.125	1.145	1.16	1.16	1.165	1.195	1.23	1.215	1.15	1.07	1.07	1.07	1.09	1.16	1.2	1.21	1.2	1.21	1.215	1.25	1.26	1.24	1.265	1.32	1.345	1.42	1.45	1.425	1.325	1.29	1.27	1.295	1.295	1.305	1.255
RPL11	1	0.95	0.91	0.89	0.93	0.96	0.94	0.93	0.92	0.88	0.86	0.83	0.82	0.83	0.82	0.81	0.81	0.81	0.8	0.79	0.78	0.74	0.73	0.72	0.75	0.75	0.77	0.75	0.75	0.77	0.79	0.78	0.81	0.84	0.91	0.93	0.97	0.95	0.95	0.97	0.97	0.97	0.98	0.94	1.01	1.06	1.1	1.09	1.02
RPL12	1	1.06	1.12	1.05	0.88	0.82	0.79	0.8	0.9	0.92	0.92	0.82	0.81	0.9	0.85	0.83	0.79	0.77	0.76	0.72	0.73	0.78	0.87	0.88	0.76	0.76	0.86	0.84	0.84	0.7	0.7	0.71	0.78	0.67	0.63	0.87	0.95	0.86	0.81	0.86	0.91	0.93	0.87	0.87	0.89	0.89	0.84	0.78	0.76
RPL13A	1	1.06	1.13	1.14	1.14	1.12	1.08	1.04	1.04	1.04	1.05	1.05	1.04	1.03	1.01	1.01	1	1.01	1.02	1.03	1.02	1.03	1.01	0.99	1	0.99	0.99	0.99	0.99	0.99	1	1	0.99	1	1	0.99	0.99	1	1	1	0.99	0.98	0.98	0.96	0.97	0.99	0.99	1.01	1.01
RPL18	1	1.048	1.092	1.104	1.126	1.17	1.17	1.182	1.186	1.176	1.172	1.164	1.18	1.184	1.146	1.12	1.088	1.092	1.082	1.082	1.09	1.08	1.072	1.042	1.02	1.02	1.036	1.02	1.002	0.988	1.004	1.02	1.03	1.05	1.062	1.038	1.036	1.044	1.042	1.05	1.048	1.058	1.06	1.044	1.044	1.074	1.072	1.074	1.092
RPL23a	1	1.07	1.11	1.1	1.1	1.1	1.1	1.12	1.11	1.09	1.08	1.07	1.06	1.06	1.06	1.06	1.08	1.06	1.05	1.03	1.02	1.02	1.03	1.05	1.05	1.04	1.02	1.02	1.02	0.99	0.99	0.99	0.99	0.98	0.97	0.97	0.98	0.98	0.98	0.98	0.97	0.94	0.94	0.94	0.96	0.99	0.99	0.98	0.98
RPL27	1	0.99	0.91	0.85	0.68	0.72	0.83	0.85	0.85	0.8	0.78	0.8	0.9	0.94	0.9	0.88	0.81	0.79	0.82	0.82	0.8	0.8	0.78	0.77	0.77	0.77	0.73	0.89	0.87	0.85	0.85	0.97	0.89	0.87	0.86	0.85	0.84	0.83	0.83	0.82	0.82	0.8	0.8	0.81	0.93	0.97	1	1.06	1.18
RPL27A	1	1.09	1.13	1.12	1.05	1.01	1.02	1.03	1.03	1.02	1.02	1	1.01	1.01	0.98	0.98	0.96	0.97	0.97	1	1.01	1.01	0.99	1.03	1.01	0.97	0.99	0.98	0.97	1	1	0.96	0.98	0.98	0.98	0.99	1.03	1.08	1.11	1.12	1.12	1.1	1.08	1.05	1.04	1.03	1.02	1.04	1.05
RPL29	1	0.92	0.86	0.88	0.91	0.95	0.97	1.005	1.01	1	1.01	1.015	1.035	1.025	1.01	0.97	0.94	0.945	0.975	0.95	0.93	0.97	0.975	0.9	0.945	1	1.045	1.08	1.08	1.08	1.06	1.035	1.035	1.01	1	0.995	0.985	0.995	1.025	1.02	1.02	1.01	1.05	1.05	1.06	1.015	1	1.01	1.005
RPL30	1	0.94	0.915	0.895	0.97	0.96	1	0.995	0.93	0.895	0.9	0.895	0.885	0.875	0.885	0.885	0.895	0.9	0.93	0.94	0.89	0.9	0.89	0.905	0.92	0.925	0.92	0.925	0.96	1.015	0.99	0.935	0.955	0.935	0.935	0.985	1.05	1.035	0.98	0.99	1.115	1.075	1.06	1.02	0.99	0.995	1.05	1.1	1.24
RPL36	1	1.03	1.03	1.01	1.04	1.06	1.07	1.14	1.14	1.15	1.14	1.15	1.15	1.14	1.14	1.12	1.1	1.09	1.12	1.12	1.12	1.09	1.09	1.08	1.08	1.09	1.11	1.12	1.08	1.09	1.09	1.09	1.1	1.08	1.09	1.1	1.07	1.09	1.1	1.09	1.11	1.11	1.1	1.08	1.05	1.05	1.03	1.03	1.01
RPL37	1	1.07	1.095	1.17	1.17	1.105	1.05	1.01	0.995	0.995	0.98	0.965	0.955	0.94	0.935	0.925	0.93	0.935	0.935	0.935	0.94	0.945	0.945	0.935	0.925	0.915	0.92	0.91	0.9	0.9	0.89	0.895	0.91	0.91	0.9	0.905	0.915	0.915	0.915	0.925	0.92	0.915	0.92	0.915	0.92	0.91	0.915	0.94	0.935
RPL39	1	1.065	1.1275	1.08	1.06	1.0275	0.97	0.915	0.8875	0.8675	0.855	0.855	0.8575	0.86	0.8375	0.8275	0.8225	0.815	0.82	0.79	0.7875	0.775	0.7525	0.7725	0.7975	0.8175	0.795	0.78	0.78	0.7875	0.8175	0.83	0.825	0.8225	0.8225	0.81	0.8025	0.7975	0.7975	0.785	0.7825	0.7875	0.795	0.81	0.8075	0.8	0.785	0.7725	0.77
RPL41	1	0.955	0.935	0.92	0.915	0.94	0.96	0.965	0.96	0.97	0.965	0.98	0.98	1	1.01	1	0.995	0.975	0.965	0.96	0.95	0.945	0.925	0.945	0.955	0.96	0.98	0.985	1.05	1.095	1.085	1.07	1.06	1.07	1.055	1.065	1.1	1.07	1.06	1.025	1.005	0.995	1.005	1.005	1.01	1.015	1.005	1.015	1.01
RPL6	1	0.985	0.975	0.9675	0.9925	1.01	1.035	1.0275	1.0325	0.9925	0.9875	0.965	0.9475	0.9325	0.9425	0.9325	0.9375	0.92	0.925	0.9475	0.9525	0.955	0.9525	0.9525	0.96	0.975	0.965	0.9575	0.96	0.965	0.9775	0.955	1.0175	1.0625	1.05	0.9925	1.01	1.01	1.015	1.0575	1.0475	1.055	1.07	1.0625	1.03	1.03	1.0825	1.0525	1.0475
RPL7A	1	0.9	0.82	0.82	0.86	0.97	1.07	1.12	1.14	1.17	1.21	1.19	1.16	1.14	1.22	1.28	1.24	1.16	1.11	1.1	1.16	1.19	1.19	1.15	1.14	1.11	1.09	1.1	1.16	1.18	1.23	1.21	1.19	1.19	1.19	1.22	1.24	1.27	1.25	1.23	1.16	1.16	1.15	1.16	1.17	1.19	1.17	1.18	1.17
RPLP0	1	1	1.04	1.09	1.09	1.1	1.08	1.06	1.04	1.01	0.99	1	1	0.99	0.99	0.98	0.95	0.92	0.93	0.92	0.93	0.92	0.95	0.95	0.98	0.99	0.98	0.97	0.98	0.99	0.98	0.99	1	0.99	0.98	1	0.99	0.96	0.96	1.02	1.02	1.03	1.05	1.07	1.09	1.05	0.98	1	0.99
RPLP1	1	0.89	0.75	0.65	0.69	0.7	0.73	0.73	0.73	0.71	0.73	0.71	0.67	0.69	0.71	0.76	0.86	0.86	0.9	1	0.93	0.91	0.88	0.91	1.01	1.03	0.99	1.03	0.99	1.05	1.09	1.09	0.99	0.99	1	0.99	0.96	0.93	0.96	1	1.02	1	1.06	1.01	1	1.04	1.04	1.03	1.04
RPM1	1	1.02	1.04	1.05	1.02	1.01	1.02	1.03	1.02	1.01	1	0.99	0.99	0.98	0.97	0.97	0.97	0.98	0.98	0.98	0.97	0.97	0.96	0.99	0.99	0.98	0.98	0.99	1.01	1	0.99	1	1	0.99	1.02	1.04	1.04	1.04	1.06	1.05	1.05	1.01	1	0.99	1	1.01	1.02	1.03	1.01
RPP40	1	0.93	0.88	0.86	0.86	0.83	0.78	0.84	0.97	0.98	0.98	1	1	1.01	0.95	1.03	1.01	1.03	1.06	1.09	1.05	0.93	0.97	0.98	0.97	0.95	1.05	1.05	1.02	1.01	1.05	1.11	1.1	1.16	1.23	1.24	1.22	1.26	1.29	1.39	1.37	1.4	1.44	1.46	1.49	1.5	1.34	1.33	1.37
RPS12	1	0.89	0.79	0.77	0.87	0.87	0.9	0.94	0.96	0.96	0.98	1	0.98	0.97	0.98	1.01	1.02	1.05	1.05	1.09	1.08	1.1	1.11	1.08	1.06	1.1	1.14	1.13	1.16	1.18	1.11	1.14	1.11	1.1	1.11	1.1	1.07	1.1	1.16	1.21	1.3	1.32	1.33	1.28	1.23	1.23	1.28	1.29	1.33
RPS13	1	1.05	1.09	1.11	1.11	1.11	1.14	1.16	1.15	1.14	1.14	1.12	1.1	1.24	1.28	1.3	1.31	1.3	1.28	1.27	1.23	1.1	1.06	1.12	1.01	1.03	1.06	1.04	1.01	1.01	1.01	1	0.99	0.98	0.96	0.96	1.05	1.06	1.12	1.09	1.07	1.05	1.06	1.08	1.05	1.02	1	1	1.01
RPS15a	1	0.87	0.72	0.71	0.74	0.78	0.8	0.84	0.88	0.92	0.95	0.98	0.99	1.02	1.03	1.05	1.05	1.07	1.05	1.07	1.07	1.08	1.09	1.09	1.1	1.11	1.09	1.06	1.04	1.07	1.11	1.12	1.11	1.12	1.13	1.13	1.14	1.11	1.04	1.03	1	1.01	1	1.04	1.03	1.03	1.03	1.06	1.06
RPS16	1	1.06	1.06	1.04	0.96	0.97	0.99	1.03	1.06	1.04	0.94	0.88	0.9	0.89	0.89	0.85	0.8	0.84	0.89	0.83	0.83	0.74	0.72	0.75	0.78	0.77	0.75	0.71	0.75	0.78	0.78	0.75	0.74	0.73	0.74	0.76	0.76	0.75	0.74	0.77	0.79	0.79	0.81	0.82	0.82	0.84	0.8	0.86	0.88
RPS17	1	0.92	0.81	0.71	0.68	0.73	0.72	0.72	0.73	0.74	0.79	0.87	0.95	0.98	1.01	1.03	1.09	1.09	1.11	1.11	1.13	1.12	1.08	0.98	0.95	0.95	0.93	0.95	0.88	0.88	0.9	0.9	0.89	0.91	0.93	0.97	1.04	1.02	1.01	1.01	0.99	1.01	0.92	0.89	0.85	0.88	0.91	0.97	1.02
RPS18	1	1.07	1.13	1.12	1.12	1.13	1.14	1.13	1.12	1.12	1.14	1.14	1.12	1.13	1.13	1.13	1.13	1.13	1.1	1.07	1.08	1.09	1.07	1.05	1.13	1.15	1.21	1.23	1.19	1.19	1.18	1.18	1.14	1.1	1.1	1.11	1.08	1.09	1.1	1.1	1.1	1.09	1.08	1.06	1.04	1.04	1.05	1.07	1.09
RPS19	1	1.07	1.14	1.16	1.17	1.17	1.14	1.14	1.15	1.16	1.17	1.16	1.15	1.14	1.14	1.14	1.16	1.17	1.15	1.13	1.12	1.1	1.12	1.12	1.11	1.12	1.1	1.09	1.08	1.07	1.06	1.06	1.04	1.04	1.02	1	0.99	0.98	0.98	0.98	0.98	0.99	1	1	1.01	1.01	1.02	1.03	1.04
RPS19BP1	1	1.03333	1.07	1.08	1.08333	1.11333	1.13	1.13667	1.12	1.12333	1.12333	1.13	1.12333	1.11	1.09667	1.08333	1.08	1.07667	1.07333	1.06	1.05333	1.04667	1.05667	1.06333	1.05333	1.04333	1.01667	1	1	1.01667	1.03333	1.05333	1.03333	1.01667	1.01667	1.02	1.02667	1.02333	1.04667	1.00667	1.00333	0.99667	0.98	0.96667	0.97	0.94333	0.96	0.95	0.98
RPS2	1	0.9875	1.02	1.1475	1.0875	1.0075	0.98	1.0375	1.1075	1.135	1.2	1.21	1.19	1.15	1.175	1.1525	1.165	1.13	1.15	1.14	1.145	1.1625	1.13	1.1275	1.1	1.09	1.0925	1.0925	1.0875	1.0975	1.045	1.0275	1.0325	1.055	1.1	1.1075	1.0375	1.0025	0.9475	0.9475	0.9625	0.9425	0.8625	0.855	0.865	0.93	0.96	0.945	0.95
RPS20	1	1.04	1.08	1.06	1.06	1.08	1.09	1.05	1.07	1.09	1.09	1.09	1.1	1.08	1.09	1.07	1.11	1.12	1.15	1.15	1.14	1.14	1.11	1.1	1.11	1.11	1.12	1.14	1.17	1.19	1.19	1.24	1.26	1.27	1.18	1.16	1.15	1.13	1.15	1.18	1.2	1.18	1.12	1.1	1.09	1.09	1.09	1.11	1.09
RPS24	1	0.915	0.775	0.705	0.72	0.77	0.825	0.85	0.85	0.81	0.82	0.855	0.86	0.935	0.965	0.95	0.905	0.915	0.915	0.93	1.005	0.95	0.985	0.91	0.865	0.855	0.855	0.875	0.875	0.87	0.855	0.895	0.905	0.925	0.93	0.915	0.92	0.92	0.93	0.9	0.96	0.975	0.92	0.9	0.89	0.9	0.94	0.96	0.97
RPS25	1	1.02	1.05	1.03	1.03	1.04	1.04	1.04	1.02	0.98	0.96	0.95	0.96	0.98	0.99	1.01	1.03	1.04	1.03	1.02	1.03	1.06	1.07	1.07	1.1	1.09	1.1	1.09	1.08	1.09	1.1	1.1	1.05	1.04	1.02	1.03	1.04	1.06	1.04	1.04	1.05	1.04	1.01	1	1	0.99	0.99	1	0.99
RPS28	1	0.97	0.9	0.89	0.95	0.98	0.97	0.94	0.94	0.91	0.95	1.03	1.05	1.04	1	1.05	1.07	1.05	1.06	1.1	1.14	1.1	1.08	1.11	1.14	1.16	1.18	1.22	1.23	1.23	1.24	1.18	1.2	1.19	1.23	1.26	1.25	1.26	1.22	1.16	1.14	1.13	1.17	1.17	1.22	1.2	1.22	1.21	1.25
RPS3A	1	0.95	0.935	0.9675	0.98	1.035	1.1	1.1175	1.1525	1.175	1.1875	1.2025	1.2075	1.2	1.22	1.195	1.17	1.185	1.17	1.2125	1.2275	1.23	1.165	1.17	1.1425	1.125	1.1025	1.1025	1.1075	1.0875	1.115	1.12	1.1275	1.1225	1.1125	1.13	1.07	1.04	1.06	1.1075	1.1025	1.0325	1.0475	1.0825	1.0675	1.02	1.0275	1.0625	1.095
RPS6	1	1.02667	1.07	1.07	1.07	1.07	1.06667	1.08	1.08667	1.09667	1.09	1.09667	1.11	1.10667	1.11333	1.12333	1.12667	1.12333	1.11667	1.11	1.11333	1.10333	1.08333	1.11	1.11667	1.12333	1.12667	1.13333	1.13	1.11667	1.09333	1.1	1.11333	1.11	1.10667	1.13333	1.14	1.15	1.16667	1.15333	1.15	1.14333	1.15333	1.15	1.14667	1.14333	1.13667	1.13333	1.12333
RPS7	1	1.09	1.1525	1.1525	1.1225	1.0525	0.985	0.945	0.9225	0.9175	0.9175	0.9125	0.9075	0.9	0.895	0.875	0.865	0.865	0.8675	0.8625	0.86	0.86	0.86	0.8725	0.875	0.8775	0.875	0.8725	0.8675	0.87	0.8725	0.875	0.87	0.87	0.88	0.885	0.8825	0.88	0.8725	0.8675	0.8725	0.865	0.865	0.86	0.8475	0.8425	0.835	0.8275	0.83
RPS8	1	1.07	1.16	1.19	1.19	1.18	1.17	1.17	1.18	1.16	1.16	1.14	1.14	1.12	1.13	1.12	1.12	1.14	1.14	1.13	1.15	1.14	1.2	1.23	1.26	1.22	1.18	1.17	1.16	1.18	1.16	1.19	1.24	1.21	1.24	1.26	1.25	1.22	1.13	1.11	1.15	1.14	1.14	1.14	1.18	1.2	1.19	1.21	1.22
RRAS	1	1.11	1.19	1.16	1.12	1.02	0.97	0.95	0.94	0.94	0.94	0.93	0.92	0.91	0.92	0.92	0.93	0.93	0.94	0.93	0.94	0.94	0.93	0.94	0.94	0.94	0.91	0.92	0.9	0.89	0.89	0.89	0.88	0.89	0.88	0.88	0.88	0.89	0.89	0.89	0.89	0.91	0.89	0.9	0.91	0.92	0.93	0.94	0.9
RRM1	1	1	0.99	0.98	1.02	1.03	1.05	1.04	1.03	1.02	1.03	1.04	1.05	1.05	1.01	1	1.04	1.03	1.03	1.03	1.01	0.99	0.97	1.01	1	1	1.01	0.99	0.98	0.96	1.03	1.12	1.13	1.11	1.08	1.06	1.07	1.08	1.06	1.07	1.06	1.09	1.09	1.11	1.11	1.11	1.18	1.17	1.16
RSL1D1	1	1.07	1.11	1.12	1.1	1.05	1.03	1.02	1.02	1.01	1.01	1	1	0.99	0.95	0.96	0.97	0.95	0.93	0.96	0.95	0.95	0.95	0.95	0.98	0.96	0.96	0.97	0.96	0.96	0.95	0.95	0.94	0.93	0.94	0.97	0.97	0.97	0.95	0.95	0.95	0.93	0.93	0.94	0.94	0.92	0.91	0.91	0.92
S100A10	1	1.02	1.14	1.23	1.39	1.44	1.44	1.41	1.38	1.38	1.37	1.4	1.39	1.26	1.3	1.35	1.35	1.41	1.42	1.4	1.53	1.49	1.5	1.63	1.64	1.45	1.39	1.36	1.38	1.42	1.39	1.38	1.37	1.39	1.38	1.4	1.43	1.44	1.44	1.41	1.34	1.32	1.27	1.26	1.3	1.33	1.39	1.36	1.38
SAFB2	1	1.12	1.18	1.24	1.09	1	0.94	0.88	0.85	0.83	0.82	0.83	0.82	0.81	0.79	0.78	0.78	0.77	0.76	0.76	0.77	0.76	0.75	0.77	0.8	0.81	0.81	0.82	0.82	0.83	0.86	0.88	0.85	0.84	0.85	0.82	0.8	0.83	0.81	0.8	0.8	0.8	0.79	0.77	0.77	0.77	0.79	0.79	0.78
SAP30BP	1	1.02	1.06	1.07	1.07	1.06	1.06	1.06	1.07	1.08	1.08	1.08	1.09	1.09	1.09	1.09	1.06	1.07	1.08	1.08	1.07	1.06	1.04	1.03	1.02	1.03	1.03	1.04	1.04	1.04	1.02	1.05	1.05	1.04	1.05	1.06	1.06	1.07	1.07	1.07	1.06	1.06	1.07	1.07	1.07	1.06	1.07	1.06	1.07
SERF2	1	1	1.07	1.03	0.99	0.99	0.98	0.97	0.96	0.87	0.87	0.8	0.81	0.8	0.82	0.83	0.82	0.83	0.84	0.81	0.83	0.83	0.79	0.81	0.83	0.82	0.81	0.81	0.8	0.79	0.78	0.79	0.8	0.8	0.8	0.82	0.83	0.84	0.85	0.83	0.84	0.85	0.83	0.82	0.86	0.87	0.88	0.87	0.86
SETMAR	1	1	1.04	1.12	1.15	1.19	1.19	1.19	1.17	1.19	1.23	1.33	1.31	1.29	1.27	1.29	1.31	1.31	1.29	1.27	1.27	1.27	1.17	1.17	1.18	1.17	1.18	1.21	1.28	1.28	1.24	1.21	1.28	1.26	1.25	1.27	1.27	1.28	1.29	1.28	1.29	1.27	1.28	1.25	1.27	1.22	1.2	1.22	1.22
SFRS7-MIXED	1	0.95	0.96	1.18	1.09	0.9	0.81	0.79	0.78	0.88	0.87	0.83	0.81	0.79	0.79	0.81	0.74	0.72	0.76	0.71	0.67	0.67	0.74	0.78	0.78	0.77	0.78	0.77	0.64	0.61	0.59	0.66	0.72	0.73	0.58	0.68	0.68	0.66	0.6	0.49	0.54	0.49	0.5	0.56	0.55	0.53	0.56	0.56	0.6
SH3GLB1	1	1.03	0.96	0.95	0.96	0.98	0.94	0.99	1	1.05	1.04	1.03	0.99	0.94	0.93	0.93	0.92	0.93	0.9	0.91	0.9	0.88	0.87	0.82	0.78	0.76	0.76	0.78	0.77	0.76	0.75	0.75	0.75	0.71	0.7	0.68	0.69	0.66	0.64	0.61	0.63	0.65	0.66	0.7	0.74	0.74	0.74	0.77	0.77
SH3KBP1	1	0.94	0.9	0.86	0.9	0.93	0.93	0.96	0.97	0.98	0.96	0.92	0.91	0.94	0.98	1.01	0.95	0.99	1.03	1.04	1.09	1.09	1.04	0.95	0.98	0.99	1.03	1.05	1.05	1.1	1.12	1.09	1.12	1.09	1.02	1.03	1.04	0.97	1.01	1.02	1	1.05	1.04	1.02	1.02	1.03	1.06	1.07	1.07
SLBP	1	1.02	1.06	1.05333	1.05667	1.03	0.98667	0.92333	0.87333	0.85333	0.84333	0.85333	0.86	0.86667	0.91333	0.92	0.90333	0.89333	0.89667	0.89333	0.89	0.89	0.89333	0.91333	0.91333	0.89333	0.89	0.88667	0.88667	0.91667	0.90667	0.89	0.87333	0.88	0.88	0.89667	0.90667	0.9	0.9	0.90667	0.90333	0.89333	0.88667	0.88667	0.89	0.89667	0.89667	0.90333	0.9
SLC25A37	1	0.87	0.8	0.85	0.91	0.96	1.06	1.07	1.04	0.86	0.78	0.77	0.73	0.72	0.71	0.73	0.81	0.86	0.9	0.93	0.93	0.92	0.87	0.88	0.88	0.91	0.94	0.9	0.89	0.88	0.89	0.87	0.84	0.83	0.87	0.9	0.92	0.97	1	1.02	1.02	1	1	0.98	1	1.09	1.06	1.05	1.06
SLC6A7	1	0.98	0.98	0.97	0.97	1	0.99	1	0.97	0.97	0.95	0.97	1	1.01	1.03	1.02	1.03	1.02	1.04	1.03	1.03	1.03	1.02	1.02	1.04	1.05	1.07	1.08	1.09	1.08	1.1	1.1	1.08	1.07	1.05	1.04	1.03	1.02	1.01	1.03	1.03	1.03	1.03	1.04	1.04	1.02	1.02	1.01	1.01
SLTM	1	1.045	1.095	1.085	1.08	1.07	1.05	1.02	1.01	0.98	0.975	0.98	0.975	0.965	0.955	0.955	0.96	0.95	0.94	0.935	0.94	0.945	0.955	0.955	0.955	0.955	0.955	0.96	0.975	0.98	0.985	0.99	0.985	0.98	0.985	0.975	0.965	0.965	0.96	0.965	0.97	0.97	0.96	0.955	0.96	0.96	0.965	0.965	0.97
SMS	1	0.965	0.955	0.975	0.975	1.01	1.02	1.05	1.055	1.07	1.08	1.09	1.12	1.14	1.17	1.195	1.25	1.295	1.275	1.25	1.245	1.23	1.245	1.235	1.255	1.26	1.26	1.275	1.31	1.345	1.375	1.33	1.305	1.32	1.32	1.29	1.235	1.175	1.175	1.18	1.2	1.18	1.21	1.235	1.245	1.22	1.2	1.21	1.22
SPATA12	1	1.04	1.08	1.06	1.05	1.04	1.03	1.01	1.02	1.02	1.02	1.03	1.04	1.03	1.03	1.01	0.99	0.98	0.98	0.97	0.98	0.99	0.99	1	1.01	1.02	1.02	1	0.99	0.98	0.99	1.02	1.03	1.03	1.02	1.01	1	0.99	1	1.03	1.02	1.03	1.01	1.01	1	1.01	1.02	1.03	1.02
SPCS1	1	0.95667	0.93333	0.96	0.98667	1.08667	1.18333	1.23667	1.27	1.27	1.25	1.25	1.23333	1.23667	1.24667	1.24333	1.23667	1.24667	1.25667	1.28333	1.28333	1.28	1.27	1.29667	1.31	1.31667	1.33	1.34	1.33333	1.31333	1.29667	1.29667	1.29	1.29	1.3	1.31333	1.29333	1.3	1.28333	1.29	1.32	1.34333	1.37	1.36667	1.34	1.30667	1.30333	1.28	1.26667
SR140	1	1.03	1.1	1.08	1.07	1.02	0.98	0.98	0.97	0.96	0.96	0.94	0.91	0.93	0.93	0.93	0.92	0.92	0.92	0.92	0.92	0.89	0.9	0.9	0.91	0.9	0.9	0.9	0.9	0.91	0.91	0.91	0.9	0.9	0.9	0.9	0.89	0.89	0.88	0.89	0.88	0.88	0.87	0.88	0.88	0.9	0.9	0.91	0.91
SR624523	1	1.02	1.05	1.09	1.14	1.18	1.18	1.15	1.11	1.07	1.07	1.1	1.12	1.11	1.11	1.1	1.11	1.12	1.11	1.12	1.12	1.12	1.12	1.13	1.13	1.13	1.13	1.11	1.11	1.11	1.11	1.1	1.1	1.11	1.13	1.13	1.15	1.16	1.16	1.16	1.16	1.18	1.16	1.15	1.16	1.17	1.18	1.13	1.13
SRI	1	1.07	1.12	1.15	1.19	1.2	1.2	1.19	1.19	1.16	1.14	1.08	1.03	1.02	1.01	1.01	1	0.97	0.97	0.97	0.97	1.01	1	1.01	1.01	1	0.98	0.97	0.92	0.9	0.88	0.9	0.89	0.89	0.92	0.96	0.97	0.97	0.98	1.01	1.03	1	0.98	0.96	0.95	0.92	0.82	0.82	0.82
SRM	1	1.02	1.08	1.1	1.1	1.08	1.06	1.07	1.11	1.11	1.12	1.12	1.14	1.13	1.12	1.08	1.09	1.12	1.14	1.13	1.08	1.04	1.04	1.05	1.06	1.08	1.08	1.08	1.07	1.1	1.1	1.09	1.05	1.05	1.07	1.06	1.04	1.04	1.05	1.07	1.06	1.06	1.05	1.06	1.07	1.07	1.06	1.05	1.06
SRRM1	1	1.05	1.09	1.13	1.03	0.95	0.88	0.85	0.84	0.84	0.84	0.84	0.84	0.83	0.82	0.82	0.81	0.81	0.82	0.82	0.84	0.85	0.85	0.85	0.86	0.85	0.85	0.85	0.82	0.82	0.81	0.81	0.81	0.81	0.81	0.8	0.8	0.8	0.8	0.8	0.79	0.79	0.8	0.79	0.78	0.78	0.78	0.77	0.77
SRRM2	1	1.05	1.11	1.09	1.06	1.03	1.02	1	0.97	0.96	0.95	0.95	0.98	1	1.01	1	1	1.03	1.01	0.99	0.98	0.98	0.96	0.96	0.95	0.94	0.95	0.95	0.94	0.94	0.94	0.96	0.96	0.96	0.96	0.95	0.97	0.96	0.94	0.93	0.93	0.95	0.94	0.94	0.94	0.94	0.93	0.92	0.92
SSBP1	1	0.99	0.95	0.95	0.92	0.92	0.92	0.91	0.92	0.96	0.98	0.96	0.97	0.94	0.96	0.97	1.01	1.01	0.99	1	1	1	1.05	1.03	0.99	0.97	0.98	1	1	1.04	1.04	1.04	1.02	0.99	0.98	1	1.04	1.06	1.08	1.06	1.08	1.11	1.12	1.13	1.11	1.09	1.09	1.07	1.07
T85821	1	0.92	0.89	0.93	0.99	1.04	1.05	1.03	1.01	0.96	0.95	0.96	0.99	0.97	0.99	0.95	0.99	0.99	0.96	0.98	1.03	1.03	1.05	1.08	1.07	1.06	0.99	0.98	0.97	0.95	0.97	0.95	0.97	1.01	1.02	1	1.04	1.09	1.17	1.26	1.29	1.3	1.26	1.24	1.25	1.15	1.1	1.12	1.13
T85822	1	0.93	0.85	0.8	0.87	1	1.06	1.14	1.19	1.26	1.31	1.3	1.28	1.33	1.24	1.22	1.25	1.23	1.29	1.35	1.36	1.44	1.45	1.31	1.19	1.11	1.06	1.02	1.04	1.12	1.14	1.17	1.19	1.23	1.25	1.27	1.33	1.34	1.24	1.09	1.07	1.12	1.1	1.14	1.14	1.14	1.11	0.99	0.98
T85823	1	0.92	0.83	0.86	0.85	0.94	1.04	1.06	1.04	0.99	1	0.99	1.03	1.07	1.12	1.1	1.1	1.09	1.05	1.03	1.07	1.07	1.11	1.03	1.05	1.05	1	1.05	1.06	0.96	1.02	1.01	0.99	0.99	0.94	0.95	1	0.93	0.95	0.97	1	1.04	1.09	1.13	1.16	1.08	1.07	1.04	1.06
T85824	1	0.93	0.83	0.83	0.84	0.84	0.86	0.9	0.94	0.95	0.93	0.86	0.88	0.96	0.95	0.93	0.91	0.91	0.89	0.85	0.8	0.8	0.82	0.8	0.8	0.83	0.9	0.91	0.91	0.9	0.9	0.9	0.84	0.87	0.88	0.92	0.92	0.93	1.02	1.04	1.01	1.01	0.99	0.97	0.99	1.03	1.04	1.02	0.98
TARS	1	1.01	0.97	0.98	1	1.03	1.05	1.07	1.07	1.07	1.07	1.07	1.09	1.1	1.09	1.1	1.12	1.09	1.08	1.06	1.06	1.07	1.04	1.05	1.04	1.04	1.07	1.07	1.09	1.11	1.13	1.14	1.15	1.15	1.17	1.12	1.08	1.06	1.03	1	0.98	0.98	0.97	0.98	0.98	1.02	1.04	1.04	1.03
TBCA	1	1.015	1.03	1.03	1.03	1.045	1.025	1.03	1.02	1.005	1.01	1.03	1.04	1.05	1.04	1.04	1.035	1.045	1.035	1.015	0.995	1.01	1.03	1.015	1.025	1.005	1	0.995	1.015	1.03	1.005	1.005	0.995	1.015	1.015	1.03	1.045	0.915	0.925	0.925	0.93	0.95	0.94	1.025	1.01	0.965	0.97	0.965	1.04
TBCB	1	0.95	0.82	0.755	0.805	0.855	0.875	0.855	0.875	0.94	0.98	0.96	0.97	0.935	0.905	0.885	0.93	0.97	1.035	1.04	1.065	1.065	1.055	1.03	0.97	1.02	1.085	1.17	1.205	1.1	1.045	1.055	1.12	1.125	1.085	0.985	0.925	0.93	0.97	0.93	0.94	0.985	0.97	1.03	1.115	1.19	1.22	1.215	1.17
TDG	1	1.09	1.14	1.19	1.16	1.09	1.04	1.02	1	0.98	0.98	0.97	0.99	0.98	0.98	0.97	0.96	0.98	0.99	1	0.99	0.99	0.98	0.97	0.96	0.95	0.95	0.95	0.93	0.93	0.93	0.92	0.91	0.91	0.91	0.92	0.91	0.91	0.9	0.91	0.9	0.91	0.9	0.9	0.9	0.89	0.88	0.89	0.9
TEKT2-mislocalized	1	1	0.99	1.18	1.09	0.92	0.88	0.85	0.85	0.85	0.86	0.86	0.84	0.83	0.81	0.81	0.81	0.8	0.82	0.84	0.84	0.85	0.85	0.86	0.84	0.86	0.91	0.92	0.95	0.93	0.91	0.92	0.91	0.95	0.95	0.9	0.85	0.86	0.84	0.84	0.84	0.84	0.86	0.88	0.87	0.9	0.91	0.9	0.89
TES	1	0.95	0.94	0.93	0.97	1.09	1.13	1.13	1.2	1.19	1.21	1.19	1.2	1.2	1.25	1.27	1.24	1.22	1.25	1.33	1.38	1.4	1.42	1.42	1.45	1.47	1.5	1.37	1.34	1.31	1.29	1.29	1.29	1.34	1.37	1.33	1.32	1.3	1.29	1.28	1.31	1.3	1.33	1.33	1.32	1.32	1.27	1.34	1.36
TFAM	1	0.99	1.01	1.005	1.01	0.995	0.985	0.97	0.935	0.905	0.875	0.845	0.855	0.86	0.865	0.885	0.9	0.87	0.85	0.835	0.845	0.855	0.865	0.86	0.885	0.88	0.885	0.905	0.905	0.905	0.94	0.93	0.93	0.91	0.865	0.855	0.84	0.865	0.895	0.91	0.905	0.92	0.94	0.915	0.885	0.88	0.905	0.96	0.935
THAP7	1	1	1	0.97	0.94	1.02	1.04	1.07	1.09	1.13	1.11	1.09	1.09	1.13	1.17	1.14	1.17	1.16	1.13	1.13	1.14	1.11	1.11	1.1	1.12	1.16	1.16	1.13	1.11	1.08	1.07	1.1	1.09	1.15	1.14	1.13	1.1	1.12	1.11	1.09	1.08	1.05	1.01	1	1.01	1.01	1.04	1.03	1.04
TIMM23	1	1.005	1.01	1.025	1.005	0.99	0.96	0.965	0.975	0.96	0.965	0.99	0.99	0.97	0.955	0.95	0.945	0.925	0.915	0.9	0.905	0.93	0.955	0.96	0.91	0.89	0.895	0.89	0.93	0.965	0.98	0.98	0.99	0.985	1	1.02	1.045	1.05	1.045	1.045	1.03	1.015	1.025	0.99	0.99	1.005	0.99	0.99	1.005
TJP1	1	0.98	0.96	0.96	0.975	1.005	1.035	1.095	1.11	1.11	1.115	1.125	1.14	1.17	1.195	1.205	1.19	1.19	1.125	1.135	1.145	1.17	1.175	1.19	1.195	1.175	1.175	1.18	1.18	1.19	1.19	1.18	1.19	1.2	1.19	1.175	1.155	1.145	1.125	1.12	1.11	1.125	1.12	1.12	1.1	1.095	1.105	1.09	1.09
TLCD1	1	1	0.98	0.96	0.96	1.02	1.05	1.03	1.01	0.98	0.97	1.03	1.04	1.06	1.06	1.02	1.01	1.01	1.03	1.01	1.06	1.07	1.05	1.04	1.04	1.12	1.1	1.09	1.09	1.11	1.1	1.1	1.11	1.09	1.09	1.11	1.15	1.17	1.16	1.08	1.08	1.09	1.09	1.11	1.13	1.13	1.15	1.14	1.15
TLN2	1	1.01	1.08	1.12	1.13	1.11	1.1	1.11	1.11	1.13	1.12	1.12	1.14	1.13	1.09	1.11	1.13	1.12	1.09	1.07	1.05	1.04	1.04	1.04	1.04	1.04	1.05	1.07	1.05	1.05	1.04	1	1	1.01	1.01	1	1.01	1.02	1.03	1.05	1.04	1.03	1.02	1.01	1.01	0.98	0.98	0.98	0.97
TMEM123	1	1.07	1.13	1.14	1.18	1.15	1.12	1.11	1.09	1.06	1.02	0.98	0.96	0.96	0.95	0.94	0.95	0.94	0.95	0.93	0.94	0.93	0.93	0.91	0.89	0.88	0.89	0.91	0.91	0.9	0.89	0.89	0.89	0.88	0.89	0.9	0.91	0.9	0.89	0.9	0.9	0.92	0.91	0.9	0.89	0.93	0.95	0.97	0.96
TMEM132D	1	0.92	0.87	0.88	0.87	0.88	0.86	0.89	0.9	0.9	0.96	0.98	0.99	0.98	0.96	0.97	0.97	0.95	0.97	0.97	0.96	0.97	1.03	1.04	0.99	0.95	0.95	0.95	0.97	1.01	1.01	0.97	0.98	0.99	0.99	1.03	1.01	1	1.03	1.07	1.09	1.1	1.16	1.2	1.21	1.23	1.23	1.23	1.24
TMPO	1	1.09	1.16	1.16	1.12	1.1	1.08	1.07	1.05	1.04	1.05	1.03	1.04	1.04	1.03	1.03	1.03	1.02	1.01	0.99	0.96	0.96	0.97	0.97	0.95	0.94	0.93	0.92	0.92	0.93	0.93	0.91	0.91	0.9	0.91	0.91	0.91	0.89	0.87	0.86	0.87	0.88	0.87	0.87	0.84	0.83	0.85	0.85	0.85
TNRC5	1	1.08	1.12	1.12	1.11	1.05	1.05	1.02	1.04	1.02	0.99	0.97	0.95	0.94	0.93	0.92	0.91	0.91	0.9	0.89	0.89	0.9	0.91	0.9	0.9	0.91	0.92	0.93	0.94	0.94	0.92	0.91	0.91	0.9	0.91	0.91	0.89	0.89	0.87	0.87	0.87	0.87	0.86	0.85	0.84	0.85	0.85	0.85	0.86
TOMM7	1	0.92	0.86	0.85	0.92	0.96	0.98	0.98	0.97	0.96	0.95	0.95	0.96	0.95	0.96	0.97	0.99	1	0.99	1	1	1.01	1	1.02	1.02	1.02	1	1	1.01	0.99	1	1.01	1.02	1.01	1.03	1.03	1.03	1.04	1.03	1.02	1.01	0.98	0.99	0.99	1	1	1.02	1.04	1.03
TOMM70A	1	0.995	1.03	1.055	1.05	1.03	0.99	0.975	0.97	0.99	0.995	1.015	1.02	1.02	1.045	1.045	1.03	1.035	1.06	1.065	1.065	1.05	1.05	1.05	1.04	1.035	1.01	1.01	0.98	0.965	0.965	0.955	0.965	0.965	0.97	0.995	0.965	0.975	0.98	1	0.98	1	1.005	1.005	1.005	1.01	1.015	1.03	1.05
TOP1	1	1.065	1.09667	1.06667	1.05	1.035	1.02667	1.01667	1.00667	0.99167	0.97333	0.96167	0.955	0.94833	0.94167	0.93	0.91833	0.90833	0.91	0.905	0.91333	0.915	0.90833	0.90333	0.89	0.885	0.88667	0.88667	0.88167	0.88167	0.89	0.89	0.885	0.875	0.87667	0.87333	0.87333	0.87333	0.87167	0.865	0.86	0.86	0.86	0.86	0.85667	0.845	0.84	0.845	0.85
TPM1	1	1.02	1.1	1.11	1.11	1.12	1.13	1.13	1.1	1.09	1.08	1.09	1.1	1.05	1.05	1.09	1.1	1.1	1.08	1.06	1.06	1.07	1.05	1.03	1.02	1.01	1.01	1	1	1.03	1.07	1.07	1.04	1.04	1.05	1.07	1.08	1.1	1.14	1.15	1.16	1.16	1.18	1.18	1.15	1.14	1.14	1.12	1.11
TRAPPC6A	1	0.97	0.96	0.95	0.94	0.97	0.97	0.98	0.97	0.94	0.91	0.93	0.97	0.97	0.94	0.91	0.9	0.88	0.81	0.79	0.78	0.81	0.83	0.85	0.86	0.85	0.84	0.84	0.84	0.84	0.83	0.82	0.82	0.83	0.83	0.83	0.85	0.84	0.81	0.88	0.87	0.88	0.88	0.88	0.88	0.89	0.93	0.97	0.98
TRIM25	1	1.05	1.09	1.09	1.11	1.13	1.14	1.11	1.1	1.1	1.1	1.1	1.08	1.05	1.04	1.05	1.04	1.03	1.03	1.06	1.04	1.03	1.02	1.03	1.04	1.06	1.06	1.05	1.06	1.07	1.07	1.08	1.08	1.08	1.07	1.05	1.04	1.05	1.04	1.05	1.06	1.03	1.04	1.06	1.06	1.05	1.06	1.06	1.07
TUBA1B	1	0.86	0.82	0.85	0.85	0.81	0.81	0.81	0.77	0.77	0.77	0.76	0.77	0.8	0.81	0.84	0.85	0.85	0.84	0.86	0.9	0.92	0.91	0.87	0.87	0.89	0.91	0.92	0.9	0.88	0.88	0.88	0.89	0.89	0.91	0.91	0.89	0.88	0.91	0.9	0.93	0.95	0.95	0.94	0.92	0.95	1.01	1.03	1.05
TUBA1C	1	0.875	0.815	0.82	0.84	0.865	0.855	0.885	0.87	0.89	0.855	0.86	0.89	0.885	0.905	0.895	0.91	0.93	0.94	0.975	0.98	0.955	0.96	0.895	0.895	0.905	0.88	0.925	0.895	0.995	1.035	1.11	1.105	1.11	1.13	1.06	1.03	0.945	0.99	0.99	0.95	1.005	1.025	1.055	1.05	1.02	1.005	0.965	0.935
TUBB2C	1	1	0.99667	1.00667	0.99333	1.03333	1.06	1.03667	1.02333	0.99667	0.97667	0.97	0.96667	0.97667	0.98333	1.02	1.04	1.04667	1.06667	1.09	1.05667	1.04333	1.03	1.03	1.05333	1.07333	1.11667	1.11333	1.09333	1.09	1.07	1.06667	1.07	1.07333	1.07667	1.06	1.04667	1.04333	1.02333	1.05667	1.05667	1	0.98333	0.99667	1.03333	1.03333	1.04	1.04333	1.03
TWF1	1	0.89	0.83	0.83	0.88	0.89	0.91	0.92	0.97	1	1.02	1.01	1	1.02	1.06	1.06	1.05	1.01	0.99	0.99	1.01	1.05	1.04	1.02	1.02	1.05	1	1.04	1.06	1.05	1.05	1.09	1.09	1.1	1.08	1.06	1.07	1.1	1.12	1.14	1.14	1.15	1.13	1.12	1.13	1.14	1.17	1.17	1.14
TXN	1	1	0.9825	0.9775	0.995	0.9875	0.975	0.975	0.98	1.0025	1.0375	1.03	0.995	0.98	0.975	0.985	1.0025	0.9975	0.9925	1.0525	1.0475	1.035	0.9525	0.95	0.925	0.9175	0.9275	0.9375	0.9425	0.9275	0.93	0.8825	0.9125	0.93	0.935	0.8825	0.895	0.9025	0.825	0.8125	0.815	0.83	0.84	0.8475	0.905	0.9375	0.9525	0.96	0.945
TXN2	1	1.13	1.13	1.13	1.09	1.04	1.03	0.99	0.94	0.91	0.88	0.85	0.86	0.86	0.9	0.91	0.88	0.88	0.87	0.85	0.84	0.81	0.8	0.8	0.79	0.78	0.78	0.77	0.75	0.75	0.72	0.7	0.69	0.7	0.71	0.71	0.72	0.71	0.72	0.71	0.7	0.69	0.7	0.69	0.68	0.67	0.69	0.68	0.66
TXNL1	1	0.965	0.92	0.965	1.04	1.065	1.095	1.03	0.98	0.99	1.05	1.06	1.075	1.09	1.055	1.085	1.16	1.23	1.15	1.195	1.26	1.215	1.27	1.28	1.285	1.32	1.36	1.325	1.295	1.275	1.245	1.365	1.365	1.37	1.35	1.325	1.345	1.39	1.42	1.39	1.395	1.315	1.395	1.355	1.405	1.36	1.295	1.32	1.31
TXNRD1	1	0.95833	0.94	0.96167	0.995	1.01667	1.03	1.00833	1.01833	1.01167	1.00667	0.99667	0.985	0.99667	0.99333	0.99333	0.98167	0.99333	1.01333	1.02	1.01833	1.01833	1.01	1.00833	1.02	1.04167	1.05333	1.06333	1.06167	1.06667	1.04167	1.05	1.04333	1.04667	1.03833	1.05333	1.075	1.07167	1.07167	1.07	1.045	1.03333	1.025	1.05167	1.045	1.04333	1.03667	1.05333	1.06333
U29115	1	1.08	1.02	0.99	0.91	0.81	0.74	0.71	0.64	0.64	0.63	0.64	0.64	0.64	0.65	0.65	0.63	0.63	0.63	0.62	0.61	0.62	0.62	0.6	0.62	0.64	0.66	0.65	0.64	0.64	0.64	0.63	0.62	0.61	0.59	0.61	0.61	0.61	0.61	0.6	0.6	0.61	0.63	0.63	0.64	0.64	0.63	0.65	0.64
U2AF1	1	1.05667	1.1	1.06333	0.97	0.91	0.89333	0.88667	0.86333	0.84333	0.83	0.83	0.80667	0.79667	0.79667	0.79333	0.78333	0.79333	0.79333	0.79333	0.78667	0.76333	0.77	0.78	0.78667	0.79333	0.78667	0.77	0.76333	0.76333	0.76667	0.76	0.78333	0.77667	0.78	0.78	0.79	0.79	0.78667	0.77667	0.78	0.77667	0.77333	0.76	0.75667	0.76333	0.76	0.74667	0.75333
UAP1	1	1	0.99	1.02	1.05	1.05	1.07	1.11	1.17	1.21	1.2	1.22	1.19	1.17	1.12	1.11	1.11	1.09	1.08	1.07	1.11	1.12	1.11	1.12	1.16	1.17	1.18	1.17	1.18	1.19	1.21	1.18	1.14	1.12	1.05	1.09	1.13	1.13	1.14	1.14	1.14	1.12	1.16	1.3	1.3	1.31	1.32	1.35	1.37
UBA	1	1.055	1.045	1.055	1.025	0.93	0.955	0.98	1.005	1.04	1.07	1.075	1.055	1.045	1.03	1.025	1.075	1.08	1.115	1.105	1.075	1.02	1.04	1	1.005	1	1.025	1.03	0.995	0.95	0.875	0.875	0.89	0.89	0.925	0.9	0.9	0.925	0.895	0.875	0.9	0.935	0.93	0.935	0.93	0.92	0.87	0.855	0.74
UBE2K	1	1.07	1.15	1.16	1.12	1.04	1.06	1.05	1.03	0.99	0.95	0.94	0.96	0.99	1	0.99	1.01	0.99	0.95	0.92	0.96	0.98	1.01	1.05	1.04	1.06	1.07	1.09	1.1	1.06	1.05	1.04	1.01	0.99	0.97	0.92	0.89	0.88	0.87	0.87	0.85	0.86	0.84	0.84	0.84	0.84	0.84	0.83	0.83
UBE2L3	1	0.94	0.88	0.91	0.96	0.97	0.99	1.03	1.05	1.07	1.06	1.06	1.08	1.1	1.13	1.13	1.16	1.17	1.18	1.12	1.13	1.11	1.13	1.16	1.2	1.24	1.28	1.33	1.34	1.32	1.35	1.35	1.33	1.36	1.38	1.34	1.29	1.25	1.24	1.2	1.23	1.2	1.19	1.18	1.17	1.17	1.21	1.29	1.29
UBE2N	1	1.045	1.055	1.005	0.98	0.945	0.93	0.865	0.845	0.845	0.84	0.845	0.825	0.85	0.905	0.935	0.925	0.915	0.87	0.805	0.815	0.835	0.82	0.81	0.805	0.79	0.815	0.845	0.805	0.78	0.74	0.735	0.74	0.735	0.78	0.785	0.8	0.835	0.86	0.89	0.87	0.865	0.865	0.87	0.87	0.89	0.86	0.905	0.83
UBE2Q2	1	0.99	1.02	1.02	1.03	1.03	1.02	1.03	1.02	1.01	1	0.98	0.98	0.98	0.98	0.98	0.97	0.97	0.95	0.97	0.97	0.97	0.97	0.94	0.94	0.93	0.94	0.92	0.91	0.92	0.92	0.92	0.92	0.93	0.94	0.95	0.95	0.93	0.93	0.91	0.9	0.9	0.91	0.92	0.91	0.9	0.92	0.92	0.92
UBE2V1	1	1.01	1.05	1.065	1.08	1.09	1.11	1.13	1.13	1.135	1.175	1.195	1.205	1.195	1.22	1.255	1.26	1.24	1.225	1.22	1.24	1.22	1.195	1.175	1.205	1.215	1.22	1.21	1.19	1.175	1.135	1.115	1.085	1.075	1.075	1.065	1.06	1.065	1.05	1.045	1.075	1.07	1.035	1.025	1.025	1.015	1.015	1.02	1.01
UBE2V2	1	0.94	0.87	0.905	0.915	0.92	0.93	0.96	0.98	0.99	1	0.965	0.955	0.95	0.895	0.825	0.815	0.85	0.87	0.91	0.92	0.93	0.96	0.96	0.965	0.925	0.905	0.845	0.86	0.905	0.895	0.88	0.885	0.905	0.895	0.905	0.915	0.89	0.885	0.93	0.96	0.97	0.91	0.875	0.875	0.88	0.885	0.9	0.94
UGCG	1	0.95	0.98	1	0.96	0.94	0.93	0.96	0.99	1.02	1.04	0.99	0.99	1.05	1.02	1.08	1.11	1.11	1.1	1.1	1.23	1.19	1.23	1.26	1.28	1.29	1.23	1.18	1.19	1.14	1.21	1.19	1.16	1.16	1.23	1.35	1.28	1.28	1.29	1.28	1.24	1.27	1.15	1.12	1.15	1.16	1.16	1.11	1.06
UPF2	1	0.995	0.98	0.97	1	1.045	1.06	1.045	1.03	1.005	0.995	0.985	0.97	0.97	0.985	1	0.985	0.995	0.995	0.99	0.985	0.99	0.97	0.965	0.96	0.95	0.95	0.95	0.945	0.95	0.965	0.965	0.96	0.96	0.97	0.975	0.97	0.97	0.95	0.975	0.975	0.975	0.96	0.955	0.945	0.955	0.955	0.935	0.935
UPK2	1	0.98	0.91	0.79	0.69	0.65	0.65	0.63	0.61	0.6	0.6	0.62	0.61	0.63	0.61	0.59	0.58	0.58	0.6	0.61	0.61	0.61	0.6	0.59	0.58	0.59	0.61	0.62	0.64	0.64	0.63	0.63	0.61	0.61	0.61	0.61	0.6	0.61	0.62	0.62	0.62	0.63	0.62	0.64	0.64	0.63	0.66	0.64	0.64
UQCRB	1	1	1.025	1.04	1.085	1.115	1.13	1.135	1.15	1.16	1.165	1.145	1.13	1.12	1.12	1.125	1.15	1.155	1.165	1.16	1.14	1.13	1.115	1.14	1.135	1.145	1.14	1.135	1.145	1.13	1.125	1.085	1.09	1.085	1.075	1.095	1.095	1.095	1.09	1.095	1.095	1.11	1.11	1.09	1.07	1.07	1.065	1.045	1.06
UQCRFS1	1	1.01	1.06	1.08	1.13	1.14	1.16	1.17	1.22	1.22	1.22	1.22	1.23	1.21	1.21	1.23	1.24	1.25	1.22	1.17	1.17	1.17	1.16	1.12	1.14	1.13	1.14	1.17	1.19	1.18	1.19	1.23	1.23	1.23	1.17	1.17	1.16	1.15	1.15	1.17	1.21	1.21	1.23	1.22	1.2	1.17	1.18	1.19	1.17
USP10	1	0.99	0.94	0.92	0.93	0.95	0.97	0.99	1.04	1.02	1.01	1.02	1.01	1.05	1.06	1.08	1.06	1.09	1.04	1.06	1.07	1.1	1.08	1.08	1.12	1.12	1.12	1.09	1.1	1.13	1.15	1.15	1.15	1.14	1.13	1.11	1.11	1.11	1.12	1.12	1.12	1.1	1.05	1.06	1.08	1.11	1.11	1.11	1.12
USP14	1	0.94	0.91	0.92	0.91	0.95	1	1.01	1.06	0.92	0.86	0.87	0.85	0.83	0.81	0.82	0.84	0.85	0.89	0.91	0.91	0.91	0.91	0.96	0.98	1.05	0.99	0.98	0.96	0.99	1	0.97	0.98	1.04	1.05	1.05	1.11	1.16	1.14	1.08	1.06	0.96	0.99	1.01	1.01	1.04	0.98	1.03	1.05
UTRN	1	1.03	1.12	1.16	1.14	1.13	1.16	1.15	1.17	1.21	1.2	1.21	1.26	1.24	1.22	1.24	1.28	1.28	1.26	1.26	1.22	1.22	1.25	1.26	1.24	1.24	1.25	1.22	1.22	1.25	1.22	1.19	1.21	1.2	1.21	1.2	1.21	1.22	1.21	1.19	1.17	1.15	1.14	1.18	1.16	1.16	1.19	1.19	1.16
VASP	1	0.97	0.98	0.97	1.07	1.17	1.34	1.34	1.39	1.4	1.39	1.38	1.41	1.38	1.38	1.36	1.26	1.26	1.34	1.33	1.32	1.31	1.33	1.29	1.29	1.28	1.31	1.3	1.27	1.25	1.26	1.32	1.31	1.29	1.25	1.25	1.27	1.28	1.29	1.3	1.3	1.29	1.29	1.26	1.22	1.21	1.19	1.15	1.12
VBP1	1	1.02	1.08	1.08	1.09	1.12	1.15	1.18	1.18	1.17	1.16	1.14	1.14	1.14	1.14	1.17	1.14	1.17	1.16	1.16	1.19	1.19	1.27	1.3	1.41	1.39	1.3	1.29	1.33	1.35	1.33	1.28	1.25	1.24	1.26	1.24	1.21	1.17	1.18	1.25	1.28	1.25	1.24	1.26	1.26	1.29	1.27	1.25	1.24
VCL	1	0.975	0.96	0.98	0.99	1.005	1.005	1.03	1.045	1.06	1.085	1.105	1.11	1.115	1.105	1.11	1.095	1.105	1.16	1.195	1.2	1.18	1.13	1.125	1.135	1.135	1.125	1.125	1.115	1.115	1.095	1.06	1.06	1.03	1.025	1.02	1.025	1.035	1.055	1.07	1.075	1.05	1.03	1.035	0.995	0.995	1.005	1.015	1.025
VIL2	1	0.9	0.81	0.83	0.77	0.83	0.8	0.78	0.8	0.82	0.86	0.92	0.95	0.95	0.9	0.9	0.93	0.91	0.93	0.93	0.93	0.87	0.88	0.9	0.91	0.94	0.94	0.96	0.94	0.9	0.94	0.94	0.97	0.97	0.94	0.92	0.92	0.9	0.86	0.87	0.86	0.86	0.85	0.84	0.82	0.88	0.91	0.92	0.93
VMD2L3	1	1.1	1.18	1.12	1.01	0.95	0.88	0.86	0.86	0.87	0.87	0.88	0.86	0.85	0.81	0.79	0.79	0.79	0.81	0.8	0.8	0.81	0.85	0.86	0.84	0.82	0.82	0.82	0.82	0.81	0.8	0.81	0.78	0.78	0.79	0.78	0.78	0.78	0.76	0.77	0.77	0.77	0.74	0.72	0.72	0.73	0.74	0.75	0.77
VPS26A	1	0.975	0.995	1.005	1.0325	1.055	1.0725	1.1025	1.105	1.1	1.095	1.105	1.0825	1.0925	1.105	1.1075	1.1075	1.1075	1.13	1.1475	1.155	1.1525	1.1725	1.165	1.155	1.1625	1.185	1.21	1.2025	1.18	1.1575	1.15	1.1275	1.135	1.135	1.1175	1.1175	1.1175	1.1225	1.1225	1.1175	1.1025	1.095	1.0925	1.0825	1.0875	1.0875	1.085	1.1025
vPS26A	1	0.965	0.95	0.95	0.955	0.97	0.99	1.01	1.02	1.015	1	1.005	1.02	1.015	1.03	1.03	1.025	1.035	1.03	1.03	1.03	1.035	1.035	1.035	1.04	1.04	1.04	1.02	1.03	1.06	1.045	1.04	1.02	1.015	1.02	1.02	1.03	1.01	1.015	1.03	1.04	1.045	1.065	1.085	1.065	1.065	1.055	1.05	1.05
VPS4B	1	1.01	1.05	1.08	1.07	1.04	0.98	0.95	0.94	0.94	0.94	0.94	0.92	0.91	0.91	0.92	0.92	0.91	0.93	0.91	0.9	0.91	0.91	0.91	0.91	0.9	0.91	0.93	0.93	0.93	0.93	0.96	0.97	0.96	0.96	0.94	0.93	0.93	0.93	0.96	0.95	0.94	0.94	0.93	0.93	0.93	0.93	0.94	0.93
WASF2	1	0.93	0.89	0.81	0.87	0.94	1.01	1.03	1.07	1.02	1.04	1.02	1.02	1.07	1.06	1.03	0.98	1	1.05	1.06	1.09	1.03	1.02	1.08	1.04	0.96	0.95	0.94	0.98	0.99	1.06	1.09	1.16	1.15	1.08	1.07	1.09	1.15	1.14	1.1	1.19	1.12	1.13	1.08	1.05	1.04	1.07	1.08	1.09
WDR1	1	1	1.04	1.02	1.04	1.08	1.1	1.12	1.12	1.16	1.16	1.14	1.13	1.11	1.13	1.13	1.13	1.13	1.1	1.12	1.11	1.1	1.11	1.11	1.12	1.12	1.11	1.12	1.13	1.1	1.11	1.1	1.11	1.1	1.1	1.09	1.08	1.08	1.09	1.09	1.09	1.1	1.1	1.1	1.09	1.09	1.11	1.14	1.13
WDR43	1	1.11	1.19	1.19	1.18	1.18	1.15	1.13	1.12	1.1	1.09	1.1	1.12	1.13	1.09	1.07	1.05	1.04	1.03	1.01	1.01	1.04	1.07	1.03	1.05	1.06	1.04	1.05	1.05	1.04	1.03	1.02	0.99	0.98	0.97	0.96	0.96	0.96	0.94	0.96	0.94	0.95	0.96	0.97	0.99	0.98	0.96	0.95	0.94
whoIsThisGene	1	0.88	0.8	0.87	0.93	0.98	1.04	1.02	1	1.02	1.01	1.04	1.02	1	0.99	1	1.06	1.12	1.14	1.17	1.18	1.17	1.19	1.17	1.11	1	1.07	1.15	1.23	1.24	1.16	1.19	1.22	1.23	1.2	1.12	1.09	1.08	1.14	1.05	1	1.04	1.09	1.16	1.17	1.15	1.11	1.08	1.06
WZ10	1	1.02	1.03	1.04	1.05	1.07	1.07	1.07	1.06	1.07	1.08	1.07	1.07	1.07	1.07	1.07	1.05	1.05	1.06	1.07	1.07	1.08	1.06	1.06	1.06	1.05	1.05	1.06	1.07	1.09	1.09	1.09	1.07	1.06	1.07	1.08	1.08	1.07	1.07	1.07	1.07	1.09	1.08	1.07	1.08	1.08	1.08	1.07	1.06
XRCC6	1	1.07	1.11	1.1	1.01	0.92	0.87	0.81	0.79	0.79	0.8	0.81	0.81	0.82	0.81	0.81	0.8	0.79	0.8	0.82	0.8	0.8	0.81	0.79	0.77	0.77	0.77	0.77	0.75	0.76	0.75	0.77	0.78	0.77	0.77	0.78	0.76	0.76	0.73	0.72	0.72	0.73	0.74	0.77	0.76	0.75	0.74	0.74	0.77
XTP6	1	0.76	0.6	0.65	0.69	0.78	0.83	0.87	0.86	0.92	0.95	0.95	0.95	0.95	0.95	1.01	1.01	1.01	0.99	0.98	0.95	0.94	0.93	0.92	0.91	0.95	0.92	0.92	0.95	0.99	0.97	1	1.04	1.06	1.05	1.03	1.08	1.07	1.04	1.03	1.05	1.04	1.03	1.04	1.02	1.05	1.06	1.08	1.09
YAF2	1	1.09	1.11	1.07	1.01	0.96	0.95	0.95	0.95	0.94	0.94	0.93	0.92	0.91	0.91	0.91	0.91	0.91	0.9	0.87	0.87	0.91	0.92	0.91	0.89	0.88	0.88	0.91	0.91	0.9	0.88	0.87	0.89	0.89	0.89	0.88	0.86	0.85	0.85	0.85	0.84	0.85	0.87	0.87	0.86	0.86	0.87	0.86	0.85
YAP1	1	1	1.02	1.02	1.04	1.05	1.07	1.06	1.05	1.04	1.05	1.05	1.05	1.05	1.05	1.06	1.06	1.1	1.08	1.06	1.06	1.07	1.08	1.09	1.11	1.11	1.12	1.12	1.14	1.13	1.1	1.08	1.09	1.09	1.1	1.11	1.13	1.1	1.1	1.11	1.12	1.14	1.14	1.14	1.13	1.09	1.07	1.07	1.13
YBX1	1	1.1	1.13	1.16	1.11	1.05	0.97	0.81	0.74	0.71	0.71	0.7	0.67	0.61	0.62	0.56	0.56	0.53	0.59	0.56	0.57	0.58	0.55	0.54	0.52	0.55	0.57	0.51	0.51	0.52	0.55	0.56	0.62	0.64	0.66	0.63	0.63	0.63	0.65	0.66	0.65	0.65	0.62	0.6	0.63	0.6	0.58	0.59	0.61
YT521	1	1.04	1.13	1.21	1.22	1.18	1.14	1.11	1.09	1.09	1.08	1.06	1.06	1.06	1.06	1.06	1.06	1.06	1.05	1.05	1.06	1.06	1.07	1.09	1.08	1.06	1.05	1.04	1.03	1.02	1.02	1.03	1.03	1.06	1.06	1.03	1.02	0.99	0.99	0.94	0.92	0.91	0.91	0.92	0.94	0.96	0.94	0.92	0.92
YY1	1	1.14	1.17	1.15	1.09	1.03	1	0.96	0.95	0.94	0.92	0.91	0.9	0.91	0.91	0.9	0.89	0.89	0.88	0.87	0.88	0.88	0.88	0.88	0.88	0.87	0.85	0.85	0.84	0.84	0.84	0.85	0.85	0.84	0.83	0.84	0.85	0.85	0.85	0.86	0.86	0.86	0.87	0.85	0.84	0.84	0.84	0.84	0.85
ZCD1	1	1.03	1.03	1.01	0.97	0.92	0.87	0.84	0.82	0.81	0.81	0.79	0.78	0.77	0.76	0.75	0.74	0.74	0.74	0.74	0.73	0.77	0.76	0.75	0.77	0.78	0.77	0.77	0.77	0.77	0.76	0.78	0.78	0.78	0.8	0.8	0.8	0.79	0.78	0.8	0.8	0.8	0.79	0.75	0.74	0.76	0.78	0.79	0.79
ZFAND2A	1	0.93	0.89	0.9	0.95	0.97	0.99	1.03	1.07	1.06	1.07	1.1	1.16	1.17	1.18	1.18	1.21	1.2	1.23	1.24	1.1	1.09	1.09	1.02	1.09	1.14	1.16	1.22	1.21	1.23	1.24	1.22	1.14	1.12	1.09	1.08	1.15	1.23	1.28	1.27	1.22	1.27	1.25	1.23	1.25	1.35	1.32	1.34	1.37
ZFYVE21	1	0.92	0.9	0.88	0.88	0.92	0.96	0.96	0.92	0.9	0.91	0.9	0.9	0.91	0.9	0.91	0.91	0.93	0.99	1.04	1.04	1.03	1.02	1.05	1.1	1.14	1.21	1.26	1.34	1.35	1.34	1.35	1.4	1.4	1.37	1.33	1.26	1.22	1.18	1.16	1.17	1.13	1.13	1.15	1.17	1.15	1.18	1.28	1.23
[truncated: 20 more columns]

## Sheet: nuclear_ratio NR
	frames	a frame was taken each 20 minutes - so 3 frames correspond to 1 hour)
Name	1	2	3	4	5	6	7	8	9	10	11	12	13	14	15	16	17	18	19	20	21	22	23	24	25	26	27	28	29	30	31	32	33	34	35	36	37	38	39	40	41	42	43	44	45	46	47	48	49
AA282714	0	0	0	0	0	0	0	0.68	0.66	0.65	0.63	0.56	0.55	0.56	0.57	0.55	0.55	0.55	0.56	0.56	0.46	0.44	0.47	0.48	0.5	0.54	0.54	0.52	0.53	0.51	0.48	0.48	0.51	0.52	0.48	0.47	0.46	0.47	0.43	0.47	0.44	0.44	0.44	0.46	0.47	0.47	0.49	0.51	0.49
ACOT7	0	0	0	0	0	0	0	0.695	0.65	0.61	0.59	0.585	0.565	0.565	0.56	0.555	0.555	0.545	0.545	0.545	0.54	0.535	0.525	0.525	0.52	0.53	0.53	0.55	0.54	0.56	0.56	0.54	0.55	0.55	0.55	0.575	0.575	0.57	0.585	0.595	0.595	0.585	0.59	0.595	0.605	0.615	0.6	0.6	0.595
ACTN4	0	0	0	0	0	0	0	0.59	0.56	0.55	0.53	0.51	0.51	0.47	0.41	0.42	0.39	0.45	0.45	0.43	0.43	0.44	0.44	0.45	0.46	0.46	0.44	0.42	0.49	0.54	0.57	0.56	0.59	0.64	0.64	0.66	0.64	0.62	0.64	0.63	0.62	0.59	0.63	0.66	0.68	0.65	0.66	0.66	0.64
ACTR1A	0	0	0	0	0	0	0	0.6	0.53	0.53	0.49	0.46	0.43	0.38	0.38	0.38	0.38	0.33	0.33	0.31	0.3	0.27	0.27	0.27	0.28	0.27	0.29	0.3	0.32	0.34	0.34	0.34	0.35	0.4	0.45	0.44	0.42	0.4	0.41	0.45	0.46	0.47	0.42	0.4	0.39	0.42	0.39	0.44	0.44
ACTR2	0	0	0	0	0	0	0	0.96	0.93	0.91	0.9	0.9	0.94	0.94	0.9	0.89	0.89	0.89	0.92	0.94	0.96	0.97	0.98	0.97	0.98	0.97	0.96	0.93	0.95	0.93	0.91	0.91	0.93	0.93	0.92	0.93	0.94	0.97	0.95	0.95	0.98	0.96	0.95	0.95	0.92	0.93	0.94	0.95	0.93
ACYP2	0	0	0	0	0	0	0	0.61	0.53	0.48	0.46	0.47	0.48	0.49	0.47	0.48	0.48	0.47	0.47	0.47	0.51	0.48	0.5	0.5	0.52	0.53	0.52	0.53	0.54	0.52	0.52	0.51	0.53	0.53	0.54	0.55	0.54	0.53	0.52	0.54	0.55	0.55	0.55	0.54	0.56	0.57	0.57	0.57	0.59
ADK	0	0	0	0	0	0	0	0.675	0.555	0.47	0.445	0.42	0.405	0.4	0.395	0.405	0.415	0.415	0.425	0.44	0.45	0.445	0.45	0.445	0.48	0.5	0.49	0.48	0.46	0.455	0.465	0.47	0.47	0.48	0.475	0.485	0.49	0.525	0.55	0.54	0.535	0.535	0.555	0.56	0.57	0.565	0.565	0.575	0.59
AF086125	0	0	0	0	0	0	0	0.72	0.61	0.53	0.46	0.46	0.45	0.46	0.45	0.41	0.38	0.37	0.37	0.37	0.36	0.35	0.35	0.35	0.35	0.36	0.36	0.38	0.36	0.37	0.36	0.37	0.35	0.34	0.34	0.32	0.31	0.33	0.33	0.34	0.34	0.34	0.37	0.41	0.41	0.47	0.46	0.45	0.46
AF087973	0	0	0	0	0	0	0	0.79	0.72	0.68	0.55	0.49	0.48	0.41	0.4	0.36	0.38	0.36	0.33	0.33	0.32	0.3	0.32	0.33	0.33	0.3	0.3	0.31	0.38	0.43	0.45	0.45	0.42	0.38	0.38	0.4	0.4	0.39	0.42	0.4	0.41	0.43	0.43	0.41	0.45	0.47	0.48	0.46	0.47
AI001881	0	0	0	0	0	0	0	0.63	0.58	0.53	0.52	0.53	0.53	0.52	0.49	0.47	0.46	0.45	0.47	0.48	0.48	0.47	0.45	0.47	0.47	0.49	0.49	0.49	0.48	0.48	0.45	0.44	0.43	0.43	0.45	0.45	0.44	0.45	0.44	0.45	0.47	0.5	0.51	0.51	0.5	0.52	0.56	0.55	0.55
AI208228	0	0	0	0	0	0	0	0.67	0.65	0.66	0.62	0.63	0.65	0.66	0.67	0.64	0.64	0.68	0.63	0.63	0.65	0.67	0.65	0.68	0.66	0.67	0.64	0.6	0.63	0.63	0.63	0.62	0.61	0.63	0.7	0.78	0.78	0.73	0.67	0.66	0.66	0.65	0.71	0.69	0.68	0.7	0.73	0.76	0.72
AI217733	0	0	0	0	0	0	0	0.67	0.59	0.57	0.58	0.58	0.55	0.54	0.51	0.52	0.51	0.52	0.53	0.5	0.48	0.46	0.47	0.48	0.48	0.48	0.5	0.5	0.51	0.52	0.52	0.55	0.55	0.56	0.57	0.59	0.56	0.53	0.54	0.52	0.52	0.52	0.52	0.53	0.55	0.55	0.54	0.54	0.54
AI342698	0	0	0	0	0	0	0	0.88	0.86	0.85	0.83	0.84	0.85	0.85	0.81	0.82	0.8	0.78	0.8	0.8	0.81	0.82	0.86	0.85	0.86	0.87	0.84	0.86	0.83	0.82	0.81	0.81	0.81	0.82	0.83	0.84	0.85	0.86	0.87	0.86	0.88	0.87	0.87	0.85	0.84	0.84	0.86	0.87	0.86
AI671392	0	0	0	0	0	0	0	0.95	0.95	0.94	0.94	0.94	0.95	0.95	0.93	0.93	0.94	0.95	0.95	0.95	0.94	0.94	0.94	0.95	0.94	0.94	0.94	0.94	0.95	0.95	0.95	0.95	0.95	0.96	0.96	0.96	0.97	0.96	0.95	0.96	0.96	0.96	0.96	0.97	0.97	0.97	0.97	0.98	0.98
AI733141	0	0	0	0	0	0	0	0.765	0.735	0.72	0.695	0.665	0.665	0.66	0.67	0.665	0.655	0.655	0.655	0.66	0.66	0.665	0.68	0.68	0.665	0.66	0.655	0.645	0.635	0.66	0.665	0.66	0.65	0.655	0.665	0.675	0.67	0.68	0.68	0.685	0.7	0.725	0.735	0.755	0.745	0.74	0.74	0.74	0.735
AI863545	0	0	0	0	0	0	0	0.87	0.85	0.8	0.84	0.86	0.88	0.88	0.84	0.87	0.88	0.86	0.86	0.82	0.84	0.85	0.8	0.8	0.78	0.75	0.69	0.68	0.69	0.7	0.72	0.71	0.71	0.7	0.72	0.7	0.74	0.78	0.8	0.8	0.8	0.79	0.81	0.8	0.8	0.84	0.85	0.88	0.87
AK022356	0	0	0	0	0	0	0	0.74	0.72	0.72	0.74	0.74	0.73	0.72	0.71	0.71	0.7	0.72	0.7	0.71	0.69	0.66	0.66	0.66	0.65	0.63	0.63	0.65	0.65	0.67	0.7	0.69	0.69	0.68	0.69	0.7	0.7	0.7	0.67	0.69	0.69	0.7	0.72	0.76	0.79	0.81	0.77	0.76	0.75
AK056115	0	0	0	0	0	0	0	0.81	0.81	0.83	0.85	0.85	0.89	0.89	0.88	0.87	0.87	0.86	0.86	0.9	0.9	0.88	0.87	0.84	0.85	0.85	0.81	0.88	0.91	0.84	0.85	0.85	0.84	0.85	0.85	0.85	0.86	0.87	0.86	0.86	0.85	0.84	0.86	0.85	0.9	0.91	0.89	0.86	0.93
AK091021	0	0	0	0	0	0	0	0.66	0.63	0.65	0.67	0.71	0.73	0.75	0.76	0.78	0.81	0.79	0.79	0.78	0.77	0.75	0.73	0.72	0.71	0.68	0.69	0.76	0.81	0.8	0.75	0.74	0.72	0.72	0.68	0.7	0.71	0.72	0.67	0.67	0.67	0.68	0.67	0.66	0.66	0.66	0.66	0.68	0.67
AK092541	0	0	0	0	0	0	0	0.69	0.68	0.69	0.69	0.7	0.71	0.7	0.69	0.68	0.65	0.66	0.66	0.66	0.65	0.64	0.64	0.65	0.66	0.67	0.69	0.68	0.69	0.67	0.67	0.67	0.69	0.69	0.7	0.69	0.7	0.69	0.68	0.68	0.68	0.67	0.66	0.68	0.71	0.74	0.77	0.75	0.74
AK094352	0	0	0	0	0	0	0	0.76	0.75	0.71	0.7	0.72	0.72	0.69	0.71	0.7	0.72	0.71	0.67	0.63	0.64	0.66	0.63	0.64	0.66	0.69	0.7	0.7	0.71	0.73	0.72	0.67	0.67	0.69	0.72	0.71	0.68	0.7	0.74	0.76	0.77	0.81	0.82	0.81	0.81	0.81	0.82	0.84	0.85
AK094903	0	0	0	0	0	0	0	0.91	0.92	0.92	0.9	0.88	0.89	0.89	0.89	0.89	0.89	0.9	0.91	0.91	0.92	0.92	0.91	0.9	0.91	0.91	0.92	0.93	0.93	0.93	0.93	0.93	0.93	0.94	0.94	0.93	0.93	0.93	0.94	0.95	0.94	0.95	0.96	0.96	0.97	0.97	0.97	0.97	0.97
AK097571	0	0	0	0	0	0	0	0.82	0.78	0.8	0.8	0.8	0.8	0.81	0.76	0.77	0.78	0.82	0.82	0.87	0.86	0.86	0.87	0.87	0.86	0.86	0.87	0.88	0.88	0.88	0.87	0.87	0.86	0.85	0.85	0.87	0.86	0.85	0.85	0.85	0.85	0.84	0.85	0.86	0.88	0.87	0.86	0.85	0.86
AK097658	0	0	0	0	0	0	0	0.88	0.9	0.9	0.9	0.9	0.91	0.91	0.91	0.9	0.91	0.91	0.92	0.92	0.92	0.91	0.92	0.92	0.93	0.94	0.94	0.94	0.94	0.94	0.93	0.94	0.94	0.94	0.94	0.95	0.95	0.95	0.95	0.95	0.97	0.97	0.97	0.97	0.96	0.96	0.97	0.97	0.97
AK127877	0	0	0	0	0	0	0	0.64	0.54	0.53	0.53	0.53	0.51	0.49	0.48	0.48	0.5	0.51	0.51	0.49	0.51	0.54	0.54	0.54	0.54	0.54	0.53	0.53	0.53	0.56	0.57	0.56	0.53	0.55	0.56	0.59	0.58	0.55	0.54	0.54	0.57	0.57	0.57	0.56	0.58	0.59	0.58	0.58	0.58
AKAP8L	0	0	0	0	0	0	0	0.87	0.86	0.87	0.88	0.88	0.89	0.9	0.9	0.89	0.89	0.9	0.9	0.91	0.9	0.9	0.91	0.91	0.91	0.92	0.92	0.92	0.92	0.92	0.92	0.91	0.91	0.91	0.91	0.91	0.92	0.92	0.93	0.92	0.92	0.92	0.93	0.93	0.93	0.93	0.94	0.94	0.94
ALDH3B1	0	0	0	0	0	0	0	0.85	0.78	0.68	0.65	0.66	0.67	0.6	0.57	0.58	0.58	0.6	0.57	0.56	0.55	0.51	0.5	0.52	0.55	0.54	0.54	0.54	0.55	0.59	0.58	0.66	0.72	0.71	0.72	0.72	0.7	0.7	0.67	0.62	0.6	0.63	0.71	0.6	0.59	0.67	0.68	0.72	0.69
ANLN	0	0	0	0	0	0	0	0.735	0.68	0.655	0.66	0.675	0.695	0.71	0.735	0.755	0.765	0.77	0.765	0.775	0.78	0.785	0.8	0.805	0.81	0.82	0.83	0.84	0.865	0.865	0.87	0.87	0.865	0.88	0.89	0.9	0.905	0.905	0.91	0.91	0.91	0.925	0.93	0.94	0.93	0.93	0.935	0.935	0.935
APLP2	0	0	0	0	0	0	0	0.77	0.71	0.7	0.7	0.69	0.68	0.69	0.7	0.68	0.68	0.69	0.69	0.7	0.72	0.73	0.71	0.69	0.68	0.67	0.66	0.66	0.66	0.69	0.7	0.71	0.74	0.73	0.74	0.74	0.75	0.75	0.75	0.69	0.69	0.68	0.7	0.7	0.72	0.73	0.74	0.74	0.74
ARID1B	0	0	0	0	0	0	0	0.8433	0.8433	0.85	0.84	0.8433	0.84	0.8533	0.8567	0.8533	0.8467	0.8533	0.8567	0.8533	0.8567	0.8667	0.87	0.88	0.8767	0.8833	0.88	0.88	0.8767	0.8833	0.8967	0.89	0.9	0.8767	0.8767	0.8667	0.8967	0.92	0.9267	0.9267	0.9267	0.9267	0.9367	0.93	0.93	0.95	0.9533	0.96	0.9567
ARL3	0	0	0	0	0	0	0	0.775	0.68	0.635	0.6	0.58	0.565	0.555	0.55	0.54	0.52	0.52	0.525	0.525	0.535	0.54	0.545	0.565	0.585	0.59	0.595	0.585	0.59	0.605	0.595	0.58	0.57	0.55	0.55	0.555	0.55	0.545	0.555	0.56	0.555	0.57	0.57	0.58	0.595	0.585	0.59	0.61	0.63
ARL6IP1	0	0	0	0	0	0	0	0.85	0.84	0.84	0.85	0.85	0.83	0.83	0.81	0.79	0.84	0.81	0.81	0.8	0.81	0.8	0.81	0.84	0.83	0.83	0.8	0.82	0.84	0.84	0.77	0.76	0.79	0.76	0.72	0.74	0.75	0.75	0.76	0.73	0.77	0.81	0.81	0.83	0.84	0.83	0.81	0.8	0.79
ARPC1A	0	0	0	0	0	0	0	0.66	0.59	0.59	0.59	0.58	0.56	0.55	0.55	0.54	0.52	0.51	0.49	0.46	0.45	0.45	0.44	0.45	0.5	0.51	0.52	0.5	0.47	0.47	0.49	0.51	0.51	0.51	0.51	0.5	0.49	0.48	0.47	0.5	0.51	0.52	0.53	0.54	0.55	0.55	0.54	0.54	0.53
ARPC2	0	0	0	0	0	0	0	0.4	0.31	0.25	0.22	0.2	0.18	0.17	0.17	0.16	0.16	0.15	0.15	0.15	0.15	0.15	0.15	0.17	0.16	0.14	0.14	0.17	0.17	0.17	0.17	0.19	0.18	0.18	0.19	0.18	0.19	0.2	0.23	0.23	0.24	0.23	0.22	0.23	0.24	0.24	0.24	0.24	0.24
ARPC3	0	0	0	0	0	0	0	0.69	0.66	0.63	0.62	0.64	0.65	0.62	0.61	0.6	0.58	0.58	0.55	0.54	0.54	0.52	0.5	0.52	0.49	0.48	0.49	0.49	0.5	0.52	0.5	0.5	0.51	0.53	0.56	0.58	0.57	0.57	0.56	0.58	0.59	0.59	0.59	0.58	0.59	0.62	0.65	0.66	0.67
ATF1	0	0	0	0	0	0	0	0.85	0.78	0.71	0.71	0.67	0.65	0.65	0.67	0.69	0.69	0.68	0.67	0.68	0.68	0.65	0.67	0.69	0.7	0.68	0.63	0.64	0.66	0.67	0.68	0.67	0.66	0.67	0.65	0.69	0.72	0.72	0.73	0.76	0.78	0.72	0.79	0.81	0.79	0.78	0.8	0.82	0.85
ATG3	0	0	0	0	0	0	0	0.66	0.64	0.64	0.66	0.62	0.63	0.62	0.59	0.58	0.57	0.53	0.53	0.53	0.55	0.54	0.56	0.6	0.59	0.5	0.49	0.5	0.54	0.56	0.57	0.6	0.55	0.57	0.58	0.62	0.61	0.59	0.61	0.62	0.64	0.65	0.61	0.6	0.63	0.61	0.59	0.59	0.67
ATP5C1	0	0	0	0	0	0	0	0.73	0.64	0.57	0.54	0.53	0.52	0.5	0.5	0.49	0.49	0.48	0.46	0.46	0.45	0.46	0.44	0.43	0.41	0.4	0.44	0.45	0.47	0.49	0.5	0.51	0.5	0.49	0.52	0.54	0.55	0.55	0.55	0.54	0.53	0.54	0.53	0.52	0.52	0.5	0.48	0.48	0.53
ATP5J2	0	0	0	0	0	0	0	0.61	0.51	0.46	0.46	0.47	0.47	0.46	0.46	0.47	0.47	0.46	0.47	0.45	0.44	0.43	0.44	0.42	0.42	0.42	0.44	0.46	0.49	0.47	0.47	0.45	0.46	0.44	0.41	0.43	0.44	0.45	0.47	0.48	0.49	0.51	0.5	0.52	0.52	0.53	0.55	0.53	0.51
AV741821	0	0	0	0	0	0	0	0.53	0.48	0.49	0.5	0.48	0.47	0.44	0.44	0.44	0.43	0.4	0.4	0.44	0.47	0.48	0.45	0.42	0.4	0.39	0.38	0.37	0.37	0.4	0.4	0.39	0.39	0.41	0.43	0.46	0.48	0.48	0.46	0.48	0.48	0.53	0.53	0.53	0.5	0.46	0.43	0.44	0.46
AW418496	0	0	0	0	0	0	0	0.87	0.89	0.89	0.88	0.87	0.84	0.84	0.85	0.85	0.83	0.83	0.83	0.84	0.86	0.86	0.85	0.84	0.84	0.84	0.85	0.87	0.84	0.84	0.87	0.87	0.88	0.87	0.87	0.85	0.86	0.87	0.91	0.92	0.9	0.89	0.91	0.91	0.92	0.91	0.9	0.91	0.92
AX748230	0	0	0	0	0	0	0	0.69	0.625	0.62	0.61	0.58	0.555	0.55	0.555	0.55	0.545	0.565	0.57	0.58	0.575	0.57	0.545	0.55	0.53	0.53	0.53	0.535	0.525	0.53	0.55	0.56	0.57	0.595	0.6	0.61	0.63	0.625	0.61	0.62	0.625	0.63	0.65	0.615	0.61	0.61	0.625	0.635	0.64
AY480055	0	0	0	0	0	0	0	0.67	0.57	0.52	0.52	0.53	0.52	0.51	0.54	0.51	0.49	0.52	0.5	0.5	0.49	0.48	0.5	0.53	0.52	0.52	0.52	0.54	0.55	0.54	0.53	0.53	0.54	0.54	0.5	0.49	0.49	0.54	0.53	0.53	0.53	0.52	0.51	0.52	0.51	0.53	0.54	0.55	0.56
BAG1	0	0	0	0	0	0	0	0.76	0.71	0.71	0.71	0.7	0.7	0.7	0.69	0.72	0.69	0.68	0.67	0.65	0.66	0.65	0.65	0.65	0.65	0.63	0.62	0.61	0.63	0.62	0.6	0.58	0.58	0.59	0.6	0.59	0.64	0.68	0.68	0.67	0.65	0.66	0.67	0.67	0.67	0.66	0.64	0.62	0.57
BAG2	0	0	0	0	0	0	0	0.7567	0.75	0.7267	0.7267	0.7267	0.7	0.6767	0.6733	0.67	0.69	0.6767	0.6633	0.6567	0.6533	0.65	0.66	0.6667	0.68	0.6933	0.6867	0.69	0.6867	0.6933	0.6867	0.69	0.6867	0.6867	0.7033	0.7033	0.7067	0.7033	0.6933	0.7	0.6967	0.6933	0.7	0.7	0.7067	0.7167	0.7367	0.74	0.75
BAG3	0	0	0	0	0	0	0	0.97	0.97	0.94	0.92	0.89	0.86	0.87	0.83	0.81	0.8	0.82	0.82	0.81	0.78	0.76	0.73	0.71	0.71	0.71	0.7	0.69	0.71	0.71	0.73	0.73	0.73	0.71	0.71	0.71	0.72	0.7	0.7	0.71	0.7	0.74	0.75	0.77	0.76	0.72	0.79	0.76	0.79
BANK1	0	0	0	0	0	0	0	0.79	0.76	0.73	0.7	0.65	0.66	0.65	0.62	0.6	0.57	0.58	0.59	0.59	0.61	0.59	0.58	0.58	0.61	0.6	0.6	0.61	0.62	0.66	0.63	0.68	0.65	0.65	0.66	0.65	0.62	0.63	0.64	0.67	0.68	0.7	0.7	0.72	0.73	0.71	0.7	0.7	0.72
BC039104	0	0	0	0	0	0	0	0.5733	0.4867	0.45	0.4367	0.4267	0.3933	0.3833	0.3633	0.3767	0.3733	0.36	0.3467	0.3433	0.37	0.3767	0.3833	0.4167	0.4233	0.4233	0.42	0.4333	0.4267	0.4267	0.4433	0.4467	0.4367	0.44	0.4267	0.4267	0.4233	0.4333	0.45	0.4533	0.4533	0.47	0.4733	0.4633	0.4867	0.5033	0.5133	0.51	0.51
BC042855	0	0	0	0	0	0	0	0.56	0.46	0.46	0.56	0.53	0.52	0.54	0.53	0.55	0.56	0.53	0.52	0.5	0.51	0.49	0.52	0.53	0.55	0.47	0.41	0.4	0.43	0.44	0.46	0.43	0.39	0.37	0.36	0.38	0.39	0.4	0.42	0.44	0.43	0.41	0.45	0.49	0.51	0.52	0.52	0.52	0.51
BC044741	0	0	0	0	0	0	0	0.87	0.87	0.88	0.88	0.88	0.9	0.89	0.89	0.89	0.88	0.91	0.89	0.88	0.88	0.89	0.91	0.91	0.91	0.91	0.93	0.94	0.94	0.94	0.94	0.94	0.94	0.94	0.96	0.95	0.96	0.96	0.97	0.96	0.96	0.97	0.97	0.94	0.94	0.95	0.96	0.96	0.96
BC048993	0	0	0	0	0	0	0	0.76	0.72	0.66	0.65	0.66	0.66	0.62	0.61	0.63	0.62	0.62	0.62	0.6	0.61	0.66	0.68	0.65	0.64	0.6	0.58	0.56	0.53	0.54	0.55	0.57	0.63	0.66	0.65	0.62	0.6	0.61	0.62	0.59	0.57	0.57	0.6	0.62	0.6	0.6	0.63	0.66	0.68
BCCIP	0	0	0	0	0	0	0	0.62	0.71	0.66	0.66	0.76	0.79	0.83	0.73	0.82	0.66	0.67	0.69	0.73	0.71	0.77	0.8	0.78	0.78	0.78	0.78	0.79	0.79	0.79	0.81	0.82	0.83	0.83	0.84	0.85	0.83	0.83	0.84	0.84	0.87	0.89	0.89	0.89	0.9	0.9	0.92	0.92	0.9
BE043072	0	0	0	0	0	0	0	0.49	0.48	0.48	0.47	0.47	0.42	0.38	0.39	0.42	0.44	0.44	0.44	0.46	0.44	0.43	0.4	0.41	0.4	0.43	0.45	0.46	0.49	0.5	0.49	0.44	0.42	0.47	0.51	0.56	0.56	0.58	0.55	0.54	0.55	0.59	0.57	0.54	0.51	0.54	0.57	0.53	0.52
BE048560	0	0	0	0	0	0	0	0.8	0.77	0.79	0.81	0.82	0.81	0.82	0.8	0.8	0.81	0.81	0.81	0.8	0.79	0.81	0.8	0.8	0.81	0.8	0.8	0.8	0.8	0.8	0.8	0.8	0.8	0.81	0.81	0.81	0.83	0.82	0.83	0.84	0.85	0.85	0.85	0.84	0.87	0.86	0.85	0.86	0.86
BE785612	0	0	0	0	0	0	0	0.6667	0.66	0.65	0.6333	0.6067	0.59	0.5967	0.5967	0.59	0.5633	0.5533	0.5467	0.5533	0.5533	0.5467	0.5533	0.56	0.5633	0.56	0.5533	0.56	0.55	0.54	0.5333	0.5733	0.5867	0.5933	0.6067	0.6	0.59	0.57	0.56	0.57	0.5967	0.6033	0.62	0.6033	0.6033	0.6067	0.6	0.6267	0.6233
BEST3	0	0	0	0	0	0	0	0.86	0.86	0.86	0.85	0.85	0.86	0.87	0.87	0.88	0.88	0.88	0.87	0.87	0.88	0.88	0.88	0.88	0.89	0.9	0.9	0.9	0.89	0.89	0.89	0.89	0.87	0.87	0.87	0.87	0.87	0.88	0.9	0.91	0.92	0.91	0.91	0.91	0.92	0.92	0.92	0.92	0.92
BF062994	0	0	0	0	0	0	0	0.69	0.68	0.64	0.66	0.65	0.61	0.61	0.69	0.65	0.61	0.63	0.62	0.65	0.64	0.65	0.63	0.65	0.66	0.66	0.64	0.61	0.57	0.55	0.54	0.55	0.65	0.63	0.62	0.57	0.56	0.55	0.59	0.59	0.66	0.65	0.61	0.56	0.54	0.59	0.59	0.56	0.56
BF594738	0	0	0	0	0	0	0	0.92	0.895	0.88	0.885	0.88	0.88	0.88	0.885	0.89	0.89	0.88	0.87	0.87	0.885	0.885	0.885	0.88	0.88	0.87	0.875	0.875	0.88	0.88	0.885	0.895	0.89	0.89	0.885	0.89	0.89	0.89	0.895	0.9	0.895	0.905	0.905	0.91	0.905	0.91	0.905	0.915	0.92
BF688062	0	0	0	0	0	0	0	0.865	0.85	0.84	0.855	0.865	0.875	0.87	0.87	0.88	0.885	0.885	0.89	0.89	0.88	0.88	0.89	0.89	0.885	0.89	0.895	0.885	0.885	0.89	0.885	0.88	0.875	0.865	0.855	0.88	0.88	0.885	0.89	0.905	0.915	0.915	0.92	0.92	0.925	0.93	0.91	0.915	0.905
BG203790	0	0	0	0	0	0	0	0.91	0.9	0.91	0.91	0.9	0.91	0.91	0.91	0.91	0.89	0.9	0.9	0.9	0.89	0.89	0.88	0.89	0.88	0.88	0.89	0.89	0.9	0.9	0.91	0.91	0.9	0.89	0.9	0.9	0.91	0.92	0.91	0.91	0.91	0.9	0.91	0.91	0.91	0.94	0.94	0.97	0.95
BG221753	0	0	0	0	0	0	0	0.87	0.87	0.86	0.85	0.84	0.82	0.8	0.81	0.79	0.78	0.76	0.75	0.77	0.76	0.76	0.74	0.72	0.72	0.73	0.71	0.68	0.68	0.68	0.69	0.72	0.74	0.75	0.72	0.72	0.73	0.72	0.7	0.71	0.69	0.69	0.67	0.66	0.66	0.67	0.67	0.67	0.7
BG505700	0	0	0	0	0	0	0	0.69	0.67	0.65	0.65	0.59	0.53	0.52	0.52	0.55	0.54	0.52	0.52	0.52	0.5	0.5	0.52	0.52	0.48	0.47	0.55	0.56	0.56	0.57	0.54	0.52	0.54	0.54	0.54	0.54	0.57	0.63	0.64	0.64	0.59	0.58	0.58	0.59	0.57	0.58	0.59	0.6	0.58
BI462136	0	0	0	0	0	0	0	0.87	0.88	0.88	0.89	0.89	0.89	0.9	0.9	0.9	0.9	0.91	0.91	0.91	0.91	0.91	0.91	0.91	0.86	0.86	0.87	0.85	0.84	0.84	0.84	0.85	0.84	0.82	0.79	0.79	0.84	0.86	0.86	0.85	0.86	0.85	0.86	0.88	0.87	0.87	0.86	0.86	0.87
BI762388	0	0	0	0	0	0	0	0.95	0.94	0.95	0.95	0.95	0.95	0.97	0.97	0.96	0.95	0.95	0.96	0.95	0.95	0.96	0.95	0.95	0.95	0.96	0.97	0.97	0.97	0.97	0.97	0.98	0.98	0.98	0.97	0.97	0.98	0.97	0.98	0.99	0.99	0.97	0.96	0.96	0.96	0.97	0.98	0.99	0.98
BM461531	0	0	0	0	0	0	0	0.91	0.9	0.885	0.88	0.865	0.87	0.865	0.85	0.845	0.845	0.85	0.84	0.845	0.85	0.855	0.85	0.845	0.85	0.855	0.86	0.87	0.885	0.885	0.885	0.88	0.88	0.87	0.875	0.87	0.875	0.88	0.885	0.895	0.905	0.91	0.92	0.93	0.915	0.915	0.915	0.915	0.925
BM681834	0	0	0	0	0	0	0	0.74	0.63	0.61	0.61	0.53	0.57	0.52	0.5	0.49	0.49	0.57	0.58	0.55	0.49	0.49	0.47	0.45	0.39	0.44	0.45	0.54	0.57	0.49	0.5	0.5	0.38	0.38	0.38	0.38	0.39	0.39	0.54	0.56	0.57	0.65	0.7	0.71	0.7	0.78	0.72	0.73	0.75
bpl 41-16	0	0	0	0	0	0	0	0.66	0.59	0.54	0.54	0.54	0.54	0.53	0.54	0.54	0.54	0.55	0.54	0.52	0.53	0.5	0.51	0.51	0.49	0.5	0.51	0.5	0.53	0.54	0.53	0.51	0.51	0.56	0.57	0.56	0.56	0.56	0.56	0.58	0.6	0.59	0.59	0.59	0.58	0.57	0.58	0.56	0.57
BRMS1	0	0	0	0	0	0	0	0.81	0.77	0.76	0.74	0.74	0.74	0.74	0.75	0.76	0.73	0.7	0.71	0.73	0.73	0.73	0.71	0.72	0.77	0.76	0.72	0.71	0.7	0.72	0.74	0.75	0.75	0.74	0.7	0.77	0.77	0.75	0.83	0.86	0.87	0.88	0.92	0.91	0.94	0.93	0.93	0.92	0.91
BSG	0	0	0	0	0	0	0	0.8	0.77	0.73	0.7	0.71	0.71	0.71	0.71	0.71	0.72	0.72	0.72	0.73	0.75	0.76	0.75	0.74	0.75	0.74	0.73	0.75	0.78	0.78	0.78	0.77	0.81	0.8	0.74	0.74	0.76	0.76	0.76	0.77	0.8	0.82	0.84	0.85	0.86	0.86	0.85	0.84	0.83
BTK	0	0	0	0	0	0	0	0.84	0.79	0.72	0.66	0.67	0.69	0.69	0.68	0.66	0.66	0.65	0.65	0.66	0.65	0.65	0.65	0.65	0.65	0.65	0.65	0.64	0.65	0.64	0.66	0.67	0.67	0.65	0.65	0.67	0.67	0.67	0.67	0.68	0.68	0.68	0.71	0.7	0.71	0.72	0.72	0.72	0.71
BU568189	0	0	0	0	0	0	0	0.76	0.68	0.63	0.59	0.56	0.54	0.51	0.51	0.49	0.47	0.47	0.5	0.53	0.52	0.51	0.56	0.55	0.55	0.53	0.53	0.55	0.55	0.55	0.56	0.56	0.54	0.56	0.57	0.57	0.57	0.59	0.59	0.61	0.62	0.6	0.59	0.58	0.59	0.6	0.62	0.62	0.64
BU607353	0	0	0	0	0	0	0	0.7	0.65	0.61	0.64	0.65	0.64	0.65	0.58	0.5	0.54	0.6	0.62	0.62	0.58	0.56	0.52	0.63	0.63	0.64	0.68	0.67	0.62	0.64	0.66	0.68	0.71	0.69	0.65	0.65	0.65	0.68	0.69	0.74	0.7	0.67	0.76	0.76	0.74	0.75	0.85	0.83	0.76
BX090666	0	0	0	0	0	0	0	0.69	0.6	0.54	0.52	0.51	0.51	0.53	0.53	0.53	0.54	0.54	0.53	0.52	0.53	0.52	0.53	0.55	0.57	0.58	0.59	0.6	0.61	0.6	0.6	0.59	0.59	0.58	0.59	0.6	0.58	0.57	0.56	0.57	0.57	0.57	0.54	0.55	0.56	0.57	0.58	0.58	0.6
BX100818	0	0	0	0	0	0	0	0.66	0.61	0.59	0.62	0.61	0.58	0.58	0.57	0.58	0.58	0.57	0.57	0.53	0.55	0.57	0.57	0.6	0.58	0.57	0.59	0.58	0.56	0.56	0.59	0.59	0.59	0.59	0.63	0.64	0.63	0.61	0.6	0.59	0.6	0.6	0.6	0.59	0.58	0.56	0.56	0.6	0.62
BX104605	0	0	0	0	0	0	0	0.465	0.395	0.335	0.31	0.31	0.295	0.295	0.295	0.3	0.3	0.29	0.285	0.285	0.27	0.27	0.255	0.245	0.26	0.255	0.255	0.27	0.295	0.295	0.305	0.275	0.29	0.28	0.305	0.315	0.325	0.325	0.32	0.345	0.32	0.31	0.31	0.315	0.305	0.315	0.33	0.33	0.375
BX537644	0	0	0	0	0	0	0	0.84	0.79	0.75	0.73	0.71	0.7	0.67	0.68	0.65	0.66	0.65	0.66	0.65	0.64	0.63	0.63	0.61	0.61	0.61	0.65	0.63	0.61	0.61	0.61	0.65	0.65	0.66	0.66	0.67	0.67	0.65	0.63	0.63	0.66	0.68	0.67	0.66	0.66	0.67	0.68	0.7	0.7
C12orf45	0	0	0	0	0	0	0	0.95	0.94	0.92	0.91	0.9	0.91	0.93	0.9	0.91	0.89	0.91	0.89	0.9	0.88	0.88	0.89	0.91	0.91	0.91	0.9	0.9	0.89	0.9	0.9	0.9	0.9	0.9	0.91	0.93	0.95	0.96	0.97	0.96	0.96	0.95	0.95	0.98	0.99	0.99	0.99	0.98	0.98
C14orf112	0	0	0	0	0	0	0	0.91	0.89	0.89	0.89	0.88	0.88	0.89	0.9	0.9	0.89	0.91	0.9	0.89	0.89	0.88	0.87	0.9	0.9	0.92	0.89	0.88	0.9	0.9	0.91	0.9	0.9	0.9	0.92	0.93	0.93	0.94	0.94	0.94	0.94	0.93	0.94	0.94	0.94	0.95	0.95	0.95	0.96
C14orf166	0	0	0	0	0	0	0	0.73	0.69	0.65	0.64	0.63	0.63	0.64	0.63	0.61	0.59	0.58	0.59	0.6	0.58	0.57	0.56	0.55	0.57	0.56	0.56	0.55	0.55	0.56	0.55	0.56	0.58	0.6	0.6	0.61	0.61	0.6	0.59	0.62	0.63	0.63	0.64	0.64	0.63	0.64	0.65	0.65	0.65
C14orf2	0	0	0	0	0	0	0	0.79	0.65	0.54	0.5	0.47	0.47	0.47	0.48	0.49	0.48	0.48	0.48	0.45	0.42	0.43	0.44	0.43	0.45	0.42	0.42	0.43	0.45	0.47	0.47	0.46	0.42	0.41	0.42	0.43	0.42	0.43	0.44	0.43	0.42	0.43	0.45	0.48	0.46	0.43	0.43	0.45	0.43
C19orf43	0	0	0	0	0	0	0	0.8	0.8	0.79	0.77	0.79	0.8	0.82	0.82	0.8	0.79	0.82	0.83	0.8	0.79	0.8	0.81	0.83	0.84	0.84	0.87	0.86	0.87	0.87	0.86	0.87	0.87	0.89	0.91	0.93	0.91	0.9	0.91	0.9	0.93	0.93	0.94	0.94	0.93	0.94	0.94	0.95	0.95
c19orf53	0	0	0	0	0	0	0	0.7	0.6	0.57	0.53	0.55	0.53	0.51	0.49	0.5	0.47	0.46	0.47	0.44	0.43	0.44	0.44	0.43	0.41	0.39	0.4	0.45	0.48	0.47	0.47	0.5	0.51	0.52	0.51	0.52	0.5	0.48	0.45	0.47	0.47	0.48	0.47	0.45	0.45	0.46	0.48	0.45	0.43
C1orf121	0	0	0	0	0	0	0	0.57	0.53	0.52	0.54	0.56	0.54	0.51	0.48	0.47	0.45	0.44	0.4	0.39	0.36	0.32	0.32	0.36	0.35	0.35	0.31	0.28	0.26	0.25	0.24	0.24	0.25	0.25	0.28	0.33	0.36	0.46	0.45	0.44	0.48	0.5	0.52	0.51	0.51	0.51	0.53	0.53	0.52
C1QBP	0	0	0	0	0	0	0	0.73	0.57	0.46	0.42	0.41	0.4	0.37	0.37	0.35	0.35	0.32	0.3	0.3	0.29	0.28	0.27	0.26	0.28	0.29	0.31	0.3	0.3	0.27	0.25	0.28	0.28	0.28	0.3	0.3	0.3	0.33	0.34	0.34	0.36	0.36	0.37	0.37	0.4	0.42	0.45	0.45	0.47
c21orf59	0	0	0	0	0	0	0	0.7	0.67	0.65	0.63	0.62	0.62	0.64	0.61	0.57	0.55	0.54	0.52	0.52	0.51	0.51	0.53	0.51	0.47	0.43	0.42	0.43	0.41	0.4	0.4	0.42	0.44	0.46	0.46	0.45	0.48	0.5	0.51	0.49	0.48	0.47	0.48	0.5	0.51	0.52	0.55	0.55	0.55
C22orf16	0	0	0	0	0	0	0	0.68	0.66	0.61	0.63	0.62	0.6	0.63	0.6	0.57	0.53	0.58	0.56	0.59	0.56	0.54	0.55	0.57	0.54	0.54	0.54	0.52	0.53	0.53	0.56	0.57	0.57	0.55	0.56	0.52	0.52	0.56	0.54	0.56	0.54	0.55	0.52	0.52	0.53	0.57	0.54	0.55	0.56
C2orf25	0	0	0	0	0	0	0	0.73	0.69	0.67	0.66	0.64	0.66	0.68	0.68	0.67	0.66	0.64	0.64	0.65	0.65	0.65	0.65	0.66	0.67	0.66	0.66	0.68	0.68	0.68	0.66	0.67	0.65	0.64	0.64	0.65	0.67	0.7	0.7	0.71	0.69	0.67	0.66	0.66	0.67	0.69	0.73	0.71	0.71
C3ORF19	0	0	0	0	0	0	0	0.92	0.915	0.895	0.91	0.915	0.91	0.915	0.91	0.91	0.9	0.89	0.905	0.91	0.915	0.91	0.91	0.91	0.895	0.865	0.86	0.865	0.88	0.875	0.895	0.89	0.895	0.895	0.895	0.9	0.91	0.915	0.915	0.915	0.915	0.93	0.935	0.945	0.95	0.955	0.96	0.965	0.97
C7orf11	0	0	0	0	0	0	0	0.87	0.88	0.88	0.86	0.86	0.85	0.83	0.82	0.8	0.8	0.82	0.82	0.8	0.81	0.83	0.86	0.86	0.85	0.85	0.85	0.86	0.87	0.87	0.88	0.87	0.87	0.87	0.86	0.86	0.86	0.86	0.87	0.88	0.9	0.9	0.88	0.88	0.9	0.9	0.89	0.89	0.89
C8orf53	0	0	0	0	0	0	0	0.73	0.71	0.71	0.71	0.72	0.74	0.75	0.76	0.76	0.78	0.77	0.75	0.74	0.71	0.7	0.73	0.74	0.73	0.74	0.71	0.71	0.71	0.72	0.7	0.74	0.72	0.73	0.75	0.77	0.77	0.74	0.73	0.71	0.73	0.74	0.74	0.75	0.77	0.75	0.74	0.74	0.75
C9orf40	0	0	0	0	0	0	0	0.72	0.65	0.63	0.605	0.585	0.6	0.625	0.61	0.64	0.63	0.61	0.62	0.615	0.62	0.6	0.595	0.625	0.62	0.63	0.625	0.615	0.6	0.6	0.595	0.575	0.57	0.575	0.595	0.61	0.615	0.62	0.61	0.59	0.585	0.575	0.585	0.6	0.615	0.635	0.66	0.655	0.67
CA418524	0	0	0	0	0	0	0	0.88	0.88	0.88	0.88	0.89	0.89	0.89	0.9	0.91	0.9	0.88	0.89	0.9	0.91	0.9	0.9	0.9	0.91	0.92	0.92	0.93	0.92	0.91	0.92	0.94	0.93	0.94	0.94	0.93	0.92	0.92	0.92	0.92	0.94	0.96	0.97	0.96	0.95	0.97	0.97	0.97	0.95
CA430002	0	0	0	0	0	0	0	0.86	0.82	0.78	0.75	0.8	0.8	0.77	0.79	0.81	0.8	0.79	0.78	0.77	0.77	0.74	0.73	0.74	0.74	0.78	0.78	0.76	0.74	0.75	0.79	0.81	0.83	0.86	0.82	0.82	0.85	0.84	0.84	0.84	0.85	0.85	0.87	0.87	0.88	0.86	0.85	0.88	0.89
CACNA2D1	0	0	0	0	0	0	0	0.93	0.94	0.95	0.93	0.96	0.97	0.97	0.96	0.95	0.94	0.94	0.94	0.93	0.92	0.93	0.89	0.89	0.81	0.81	0.85	0.91	0.95	0.98	0.95	0.94	0.91	0.9	0.91	0.92	0.92	0.91	0.89	0.89	0.86	0.9	0.91	0.91	0.91	0.93	0.91	0.91	0.9
CACYBP	0	0	0	0	0	0	0	0.64	0.58	0.52	0.44	0.4	0.37	0.36	0.36	0.36	0.35	0.33	0.32	0.33	0.34	0.38	0.35	0.35	0.37	0.35	0.34	0.35	0.35	0.37	0.44	0.44	0.42	0.39	0.38	0.38	0.4	0.4	0.4	0.39	0.4	0.38	0.38	0.42	0.43	0.44	0.46	0.46	0.44
CALD1	0	0	0	0	0	0	0	0.66	0.62	0.63	0.66	0.7	0.7	0.62	0.62	0.59	0.57	0.55	0.55	0.6	0.61	0.6	0.58	0.62	0.62	0.61	0.63	0.67	0.64	0.55	0.53	0.54	0.5	0.44	0.4	0.39	0.47	0.5	0.53	0.53	0.47	0.49	0.52	0.54	0.53	0.45	0.5	0.59	0.6
CALM1	0	0	0	0	0	0	0	0.74	0.696	0.684	0.678	0.69	0.69	0.68	0.68	0.672	0.662	0.666	0.654	0.644	0.62	0.616	0.608	0.598	0.616	0.646	0.656	0.636	0.624	0.616	0.624	0.628	0.626	0.638	0.65	0.644	0.646	0.64	0.644	0.646	0.638	0.642	0.642	0.644	0.648	0.646	0.654	0.676	0.688
CALM2	0	0	0	0	0	0	0	0.62	0.61	0.64	0.62	0.63	0.61	0.58	0.53	0.5	0.52	0.56	0.54	0.56	0.51	0.52	0.51	0.5	0.48	0.46	0.49	0.5	0.48	0.44	0.44	0.45	0.46	0.49	0.52	0.51	0.53	0.51	0.53	0.52	0.57	0.57	0.54	0.55	0.57	0.56	0.56	0.56	0.52
CAST	0	0	0	0	0	0	0	0.76	0.67	0.63	0.6	0.61	0.62	0.63	0.63	0.62	0.63	0.63	0.6	0.61	0.59	0.6	0.59	0.6	0.58	0.57	0.56	0.56	0.55	0.54	0.55	0.58	0.6	0.59	0.61	0.58	0.56	0.58	0.6	0.6	0.58	0.58	0.58	0.59	0.58	0.61	0.61	0.6	0.61
CAV1	0	0	0	0	0	0	0	0.66	0.59	0.56	0.555	0.55	0.545	0.55	0.56	0.565	0.565	0.575	0.585	0.585	0.58	0.595	0.605	0.61	0.595	0.585	0.585	0.58	0.59	0.585	0.57	0.555	0.56	0.57	0.575	0.58	0.595	0.59	0.595	0.61	0.615	0.605	0.61	0.6	0.62	0.625	0.625	0.63	0.64
CB045860	0	0	0	0	0	0	0	0.55	0.51	0.52	0.54	0.53	0.52	0.51	0.47	0.44	0.45	0.46	0.46	0.47	0.46	0.49	0.48	0.49	0.51	0.51	0.51	0.54	0.53	0.56	0.57	0.57	0.59	0.61	0.58	0.55	0.51	0.49	0.46	0.41	0.45	0.47	0.5	0.51	0.56	0.6	0.57	0.57	0.59
CB046508	0	0	0	0	0	0	0	0.7	0.61	0.58	0.56	0.55	0.57	0.55	0.54	0.55	0.53	0.52	0.51	0.55	0.58	0.57	0.56	0.56	0.57	0.56	0.57	0.55	0.55	0.58	0.6	0.63	0.63	0.66	0.68	0.7	0.69	0.69	0.68	0.68	0.67	0.69	0.72	0.76	0.76	0.77	0.76	0.76	0.75
CB155900	0	0	0	0	0	0	0	0.81	0.78	0.79	0.8	0.8	0.8	0.82	0.83	0.83	0.83	0.83	0.83	0.85	0.82	0.86	0.86	0.85	0.81	0.88	0.84	0.85	0.81	0.84	0.87	0.87	0.87	0.86	0.87	0.84	0.82	0.81	0.82	0.86	0.86	0.86	0.87	0.89	0.89	0.89	0.89	0.9	0.89
CBWD5	0	0	0	0	0	0	0	0.73	0.71	0.66	0.59	0.59	0.61	0.62	0.6	0.62	0.64	0.63	0.63	0.5	0.48	0.48	0.57	0.58	0.61	0.63	0.65	0.63	0.64	0.6	0.7	0.67	0.67	0.66	0.68	0.69	0.68	0.7	0.69	0.66	0.66	0.66	0.59	0.58	0.65	0.69	0.69	0.69	0.7
CCDC12	0	0	0	0	0	0	0	0.82	0.83	0.84	0.86	0.85	0.85	0.86	0.88	0.88	0.88	0.89	0.88	0.88	0.87	0.87	0.88	0.88	0.89	0.89	0.89	0.89	0.89	0.9	0.91	0.91	0.9	0.9	0.89	0.89	0.9	0.9	0.91	0.91	0.89	0.9	0.9	0.92	0.91	0.91	0.91	0.92	0.92
CCDC23	0	0	0	0	0	0	0	0.77	0.68	0.6	0.54	0.52	0.52	0.53	0.53	0.55	0.56	0.56	0.55	0.56	0.54	0.53	0.53	0.53	0.53	0.53	0.53	0.53	0.53	0.54	0.55	0.55	0.55	0.56	0.55	0.54	0.54	0.55	0.54	0.54	0.56	0.56	0.56	0.56	0.58	0.59	0.6	0.63	0.63
CCDC50	0	0	0	0	0	0	0	0.61	0.52	0.46	0.43	0.41	0.41	0.4	0.37	0.35	0.35	0.34	0.34	0.34	0.34	0.33	0.32	0.32	0.34	0.34	0.35	0.37	0.36	0.36	0.36	0.36	0.35	0.35	0.35	0.36	0.37	0.38	0.39	0.37	0.38	0.38	0.38	0.38	0.39	0.38	0.37	0.37	0.4
CCDC72	0	0	0	0	0	0	0	0.73	0.72	0.72	0.72	0.72	0.71	0.69	0.68	0.65	0.62	0.61	0.59	0.61	0.62	0.64	0.65	0.66	0.67	0.67	0.64	0.63	0.63	0.64	0.69	0.75	0.75	0.75	0.77	0.77	0.77	0.73	0.69	0.67	0.68	0.69	0.67	0.7	0.73	0.74	0.74	0.73	0.73
CCDC74A	0	0	0	0	0	0	0	0.93	0.94	0.94	0.93	0.93	0.94	0.94	0.93	0.93	0.94	0.94	0.94	0.95	0.95	0.96	0.95	0.95	0.96	0.96	0.95	0.95	0.95	0.94	0.94	0.95	0.96	0.96	0.96	0.96	0.97	0.97	0.97	0.97	0.97	0.97	0.97	0.98	0.98	0.98	0.97	0.97	0.97
CD164	0	0	0	0	0	0	0	0.73	0.71	0.7	0.68	0.66	0.68	0.66	0.6	0.58	0.54	0.57	0.59	0.58	0.58	0.56	0.53	0.55	0.55	0.57	0.57	0.59	0.62	0.62	0.62	0.58	0.59	0.57	0.59	0.58	0.57	0.57	0.63	0.63	0.7	0.73	0.69	0.69	0.7	0.7	0.71	0.74	0.76
CD2AP	0	0	0	0	0	0	0	0.6	0.52	0.47	0.43	0.4	0.37	0.36	0.34	0.32	0.31	0.3	0.28	0.27	0.26	0.26	0.26	0.26	0.26	0.27	0.27	0.27	0.26	0.29	0.28	0.3	0.31	0.31	0.31	0.32	0.32	0.32	0.34	0.36	0.36	0.37	0.38	0.38	0.39	0.39	0.38	0.39	0.4
CD63	0	0	0	0	0	0	0	0.87	0.83	0.79	0.76	0.74	0.74	0.73	0.71	0.68	0.67	0.67	0.67	0.68	0.66	0.67	0.68	0.7	0.7	0.69	0.68	0.68	0.65	0.65	0.66	0.67	0.68	0.68	0.7	0.72	0.75	0.75	0.75	0.73	0.72	0.73	0.72	0.73	0.71	0.71	0.71	0.69	0.69
CD641745	0	0	0	0	0	0	0	0.66	0.57	0.49	0.47	0.45	0.44	0.45	0.46	0.46	0.47	0.47	0.51	0.49	0.47	0.46	0.47	0.48	0.48	0.49	0.46	0.46	0.45	0.46	0.47	0.46	0.47	0.46	0.46	0.48	0.48	0.48	0.49	0.47	0.45	0.46	0.45	0.46	0.46	0.46	0.45	0.45	0.46
CD692919	0	0	0	0	0	0	0	0.8	0.76	0.72	0.71	0.68	0.68	0.69	0.68	0.69	0.72	0.71	0.69	0.69	0.7	0.71	0.7	0.69	0.69	0.7	0.68	0.67	0.65	0.63	0.63	0.66	0.67	0.68	0.7	0.71	0.72	0.7	0.7	0.7	0.7	0.69	0.68	0.68	0.67	0.69	0.7	0.73	0.72
CDADC1	0	0	0	0	0	0	0	0.55	0.5	0.45	0.44	0.46	0.46	0.43	0.4	0.39	0.39	0.4	0.42	0.4	0.36	0.34	0.29	0.28	0.29	0.3	0.3	0.32	0.32	0.3	0.28	0.31	0.3	0.28	0.27	0.29	0.35	0.37	0.37	0.37	0.35	0.35	0.39	0.41	0.44	0.45	0.44	0.47	0.5
CDKN3	0	0	0	0	0	0	0	0.66	0.61	0.61	0.6	0.6	0.62	0.6	0.58	0.56	0.59	0.59	0.55	0.54	0.54	0.52	0.52	0.5	0.48	0.49	0.51	0.52	0.5	0.48	0.45	0.47	0.52	0.54	0.52	0.52	0.52	0.53	0.5	0.48	0.48	0.5	0.5	0.53	0.56	0.56	0.54	0.52	0.57
CHCHD2	0	0	0	0	0	0	0	0.81	0.77	0.72	0.68	0.64	0.61	0.6	0.58	0.58	0.57	0.56	0.57	0.58	0.58	0.58	0.58	0.58	0.57	0.57	0.56	0.54	0.55	0.54	0.55	0.56	0.56	0.56	0.55	0.55	0.55	0.56	0.56	0.56	0.56	0.56	0.56	0.56	0.54	0.55	0.56	0.57	0.57
CHORDC1	0	0	0	0	0	0	0	0.755	0.695	0.65	0.595	0.545	0.52	0.55	0.59	0.565	0.54	0.525	0.495	0.51	0.48	0.475	0.45	0.435	0.46	0.48	0.465	0.45	0.42	0.42	0.425	0.46	0.475	0.505	0.51	0.53	0.465	0.45	0.41	0.45	0.465	0.48	0.57	0.565	0.605	0.58	0.6	0.57	0.59
CHURC1	0	0	0	0	0	0	0	0.7	0.64	0.59	0.55	0.53	0.52	0.54	0.53	0.51	0.49	0.49	0.47	0.48	0.49	0.48	0.46	0.44	0.42	0.4	0.4	0.43	0.4	0.43	0.46	0.49	0.51	0.51	0.52	0.5	0.48	0.47	0.48	0.49	0.54	0.56	0.57	0.56	0.58	0.57	0.57	0.57	0.58
CIP29	0	0	0	0	0	0	0	0.78	0.81	0.82	0.83	0.82	0.83	0.81	0.8	0.79	0.78	0.77	0.77	0.76	0.76	0.78	0.79	0.78	0.77	0.79	0.8	0.79	0.8	0.8	0.8	0.8	0.78	0.78	0.78	0.78	0.79	0.8	0.82	0.82	0.84	0.85	0.87	0.86	0.84	0.85	0.84	0.85	0.85
CIRH1A	0	0	0	0	0	0	0	0.92	0.92	0.91	0.89	0.89	0.89	0.91	0.92	0.93	0.92	0.92	0.92	0.93	0.93	0.93	0.94	0.94	0.94	0.95	0.95	0.94	0.94	0.93	0.93	0.94	0.94	0.93	0.93	0.94	0.93	0.93	0.93	0.94	0.94	0.94	0.93	0.93	0.93	0.94	0.93	0.93	0.94
CISD1	0	0	0	0	0	0	0	0.84	0.81	0.83	0.81	0.77	0.77	0.75	0.76	0.77	0.76	0.75	0.75	0.72	0.77	0.8	0.81	0.81	0.82	0.81	0.8	0.78	0.75	0.75	0.78	0.77	0.76	0.77	0.77	0.78	0.76	0.78	0.79	0.87	0.81	0.8	0.81	0.82	0.82	0.83	0.84	0.87	0.87
CK126027	0	0	0	0	0	0	0	0.67	0.6	0.59	0.61	0.61	0.62	0.61	0.59	0.58	0.58	0.56	0.53	0.53	0.52	0.5	0.52	0.51	0.5	0.51	0.5	0.48	0.51	0.51	0.51	0.51	0.5	0.52	0.53	0.54	0.55	0.58	0.58	0.58	0.57	0.56	0.57	0.6	0.65	0.66	0.65	0.65	0.66
CKS2	0	0	0	0	0	0	0	0.855	0.78	0.735	0.705	0.685	0.67	0.67	0.695	0.7	0.7	0.73	0.73	0.7	0.685	0.68	0.66	0.68	0.665	0.655	0.63	0.625	0.625	0.675	0.69	0.7	0.71	0.69	0.675	0.7	0.715	0.73	0.7	0.695	0.705	0.715	0.735	0.735	0.75	0.74	0.745	0.745	0.745
CLCN3	0	0	0	0	0	0	0	0.89	0.87	0.84	0.84	0.84	0.83	0.84	0.84	0.85	0.85	0.85	0.85	0.83	0.82	0.85	0.86	0.87	0.86	0.88	0.92	0.9	0.9	0.9	0.87	0.88	0.87	0.86	0.86	0.87	0.87	0.88	0.91	0.92	0.87	0.87	0.87	0.88	0.89	0.9	0.89	0.89	0.89
CLIC1	0	0	0	0	0	0	0	0.73	0.72	0.69	0.69	0.68	0.67	0.67	0.64	0.65	0.63	0.62	0.58	0.62	0.56	0.54	0.55	0.54	0.54	0.52	0.52	0.54	0.54	0.53	0.52	0.51	0.52	0.52	0.52	0.49	0.48	0.48	0.47	0.46	0.48	0.49	0.48	0.48	0.52	0.53	0.53	0.55	0.59
CLIC4	0	0	0	0	0	0	0	0.78	0.77	0.76	0.75	0.7	0.66	0.65	0.68	0.66	0.64	0.63	0.64	0.64	0.58	0.57	0.57	0.57	0.53	0.52	0.51	0.51	0.55	0.57	0.61	0.6	0.58	0.58	0.57	0.6	0.61	0.6	0.6	0.61	0.66	0.67	0.64	0.63	0.61	0.62	0.61	0.67	0.74
CLINT1	0	0	0	0	0	0	0	0.6	0.54	0.48	0.46	0.45	0.44	0.41	0.33	0.31	0.33	0.35	0.35	0.35	0.36	0.45	0.4	0.37	0.38	0.37	0.49	0.37	0.38	0.49	0.44	0.38	0.38	0.36	0.35	0.29	0.4	0.29	0.4	0.3	0.34	0.41	0.44	0.39	0.43	0.51	0.56	0.48	0.5
CLPTM1	0	0	0	0	0	0	0	0.77	0.71	0.72	0.74	0.74	0.77	0.75	0.73	0.73	0.74	0.78	0.79	0.77	0.72	0.75	0.73	0.73	0.76	0.74	0.75	0.77	0.79	0.78	0.75	0.74	0.77	0.76	0.74	0.74	0.73	0.73	0.72	0.71	0.76	0.78	0.76	0.74	0.71	0.69	0.67	0.7	0.74
CN267986	0	0	0	0	0	0	0	0.69	0.63	0.63	0.66	0.67	0.69	0.72	0.73	0.71	0.71	0.72	0.71	0.65	0.67	0.68	0.66	0.63	0.63	0.64	0.69	0.67	0.67	0.67	0.69	0.68	0.66	0.66	0.65	0.61	0.6	0.55	0.57	0.57	0.6	0.63	0.67	0.67	0.67	0.7	0.76	0.84	0.85
CN398253	0	0	0	0	0	0	0	0.83	0.67	0.58	0.61	0.67	0.72	0.71	0.73	0.72	0.75	0.88	0.87	0.86	0.85	0.8	0.8	0.78	0.79	0.81	0.83	0.79	0.75	0.73	0.7	0.7	0.73	0.74	0.76	0.75	0.74	0.69	0.69	0.71	0.66	0.7	0.71	0.73	0.68	0.71	0.7	0.68	0.65
CNN3	0	0	0	0	0	0	0	0.72	0.63	0.56	0.53	0.5	0.48	0.48	0.45	0.43	0.42	0.42	0.42	0.41	0.41	0.4	0.43	0.44	0.45	0.45	0.45	0.46	0.46	0.44	0.44	0.44	0.45	0.46	0.47	0.47	0.47	0.48	0.49	0.48	0.48	0.47	0.47	0.47	0.48	0.48	0.49	0.49	0.5
COPS6	0	0	0	0	0	0	0	0.9	0.9	0.9	0.91	0.9	0.9	0.9	0.9	0.9	0.9	0.89	0.89	0.9	0.91	0.92	0.92	0.91	0.91	0.92	0.91	0.92	0.92	0.94	0.94	0.94	0.94	0.95	0.97	0.96	0.96	0.96	0.95	0.96	0.96	0.96	0.96	0.96	0.95	0.96	0.96	0.97	0.97
COX17	0	0	0	0	0	0	0	0.76	0.73	0.73	0.7	0.68	0.66	0.65	0.63	0.56	0.53	0.54	0.54	0.53	0.53	0.59	0.59	0.6	0.59	0.56	0.55	0.55	0.57	0.57	0.57	0.57	0.55	0.56	0.55	0.56	0.56	0.53	0.53	0.54	0.56	0.57	0.64	0.66	0.72	0.69	0.7	0.7	0.72
CR593740	0	0	0	0	0	0	0	0.62	0.55	0.57	0.57	0.55	0.53	0.54	0.55	0.51	0.46	0.44	0.43	0.42	0.45	0.45	0.47	0.49	0.49	0.46	0.46	0.5	0.5	0.5	0.52	0.52	0.5	0.51	0.54	0.52	0.51	0.53	0.53	0.53	0.54	0.54	0.55	0.62	0.63	0.63	0.62	0.58	0.53
CR623475	0	0	0	0	0	0	0	0.54	0.5	0.49	0.5	0.5	0.49	0.48	0.47	0.48	0.47	0.46	0.46	0.48	0.49	0.51	0.53	0.53	0.52	0.5	0.52	0.53	0.52	0.49	0.47	0.45	0.44	0.44	0.44	0.45	0.46	0.5	0.52	0.5	0.51	0.49	0.52	0.55	0.56	0.57	0.57	0.57	0.57
CR627148	0	0	0	0	0	0	0	0.59	0.57	0.58	0.57	0.55	0.55	0.53	0.5	0.51	0.5	0.5	0.47	0.5	0.52	0.53	0.54	0.54	0.53	0.52	0.53	0.54	0.54	0.55	0.54	0.54	0.53	0.53	0.5	0.48	0.51	0.52	0.53	0.53	0.57	0.57	0.56	0.53	0.53	0.52	0.51	0.52	0.52
CR737784	0	0	0	0	0	0	0	0.6	0.53	0.53	0.53	0.52	0.51	0.49	0.48	0.46	0.49	0.51	0.52	0.5	0.48	0.45	0.41	0.41	0.45	0.44	0.46	0.49	0.51	0.51	0.49	0.5	0.5	0.52	0.53	0.55	0.55	0.56	0.59	0.59	0.55	0.58	0.59	0.59	0.57	0.55	0.55	0.57	0.55
CRKL	0	0	0	0	0	0	0	0.745	0.645	0.585	0.58	0.58	0.58	0.585	0.6	0.58	0.595	0.61	0.595	0.6	0.585	0.585	0.615	0.625	0.64	0.63	0.63	0.63	0.635	0.635	0.605	0.615	0.63	0.635	0.675	0.675	0.68	0.67	0.675	0.675	0.665	0.68	0.72	0.7	0.675	0.685	0.71	0.725	0.73
CSNK1A1	0	0	0	0	0	0	0	0.6	0.61	0.58	0.61	0.62	0.6	0.59	0.59	0.58	0.58	0.6	0.61	0.62	0.71	0.73	0.74	0.72	0.68	0.72	0.72	0.68	0.62	0.63	0.65	0.66	0.69	0.68	0.71	0.72	0.72	0.69	0.7	0.7	0.7	0.66	0.67	0.69	0.64	0.66	0.65	0.71	0.7
CSTF3	0	0	0	0	0	0	0	0.83	0.76	0.71	0.65	0.51	0.47	0.44	0.41	0.39	0.4	0.41	0.41	0.4	0.39	0.38	0.4	0.41	0.43	0.42	0.4	0.42	0.47	0.48	0.45	0.43	0.44	0.4	0.38	0.38	0.39	0.41	0.4	0.4	0.42	0.46	0.47	0.47	0.47	0.47	0.48	0.5	0.51
DA336829	0	0	0	0	0	0	0	0.86	0.86	0.85	0.86	0.87	0.87	0.91	0.91	0.91	0.89	0.88	0.85	0.85	0.84	0.85	0.83	0.83	0.82	0.82	0.82	0.82	0.82	0.85	0.86	0.86	0.85	0.86	0.86	0.88	0.9	0.9	0.9	0.91	0.9	0.9	0.9	0.9	0.9	0.89	0.88	0.88	0.88
DA697821	0	0	0	0	0	0	0	0.82	0.76	0.73	0.72	0.71	0.7	0.69	0.65	0.63	0.62	0.61	0.61	0.61	0.62	0.63	0.66	0.66	0.65	0.68	0.67	0.65	0.66	0.66	0.67	0.67	0.67	0.67	0.66	0.66	0.65	0.63	0.64	0.66	0.66	0.67	0.69	0.69	0.69	0.69	0.68	0.67	0.68
DAD1	0	0	0	0	0	0	0	0.86	0.84	0.82	0.8	0.77	0.78	0.79	0.77	0.78	0.79	0.79	0.79	0.78	0.78	0.78	0.8	0.79	0.79	0.79	0.8	0.79	0.78	0.78	0.79	0.81	0.8	0.79	0.79	0.8	0.81	0.8	0.78	0.78	0.78	0.79	0.8	0.77	0.81	0.8	0.8	0.81	0.82
DAP	0	0	0	0	0	0	0	0.43	0.4	0.41	0.44	0.41	0.38	0.36	0.36	0.35	0.36	0.36	0.35	0.35	0.35	0.34	0.34	0.33	0.34	0.35	0.34	0.34	0.34	0.34	0.33	0.34	0.36	0.39	0.4	0.4	0.4	0.41	0.42	0.41	0.4	0.4	0.41	0.42	0.43	0.42	0.43	0.48	0.51
DAZAP2	0	0	0	0	0	0	0	0.51	0.39	0.36	0.35	0.35	0.35	0.37	0.35	0.34	0.35	0.35	0.35	0.34	0.32	0.31	0.31	0.31	0.31	0.3	0.32	0.32	0.33	0.34	0.35	0.36	0.36	0.38	0.37	0.41	0.47	0.47	0.46	0.41	0.4	0.43	0.46	0.47	0.47	0.47	0.5	0.49	0.5
DB049861	0	0	0	0	0	0	0	0.68	0.57	0.51	0.48	0.47	0.47	0.46	0.42	0.44	0.42	0.42	0.44	0.42	0.42	0.41	0.39	0.4	0.44	0.42	0.43	0.44	0.41	0.4	0.43	0.44	0.43	0.44	0.44	0.44	0.44	0.42	0.42	0.44	0.44	0.45	0.44	0.46	0.44	0.42	0.41	0.43	0.45
DB054822	0	0	0	0	0	0	0	0.95	0.89	0.85	0.78	0.72	0.67	0.67	0.6	0.59	0.58	0.56	0.48	0.49	0.45	0.55	0.54	0.47	0.47	0.48	0.47	0.43	0.38	0.35	0.57	0.57	0.68	0.63	0.65	0.61	0.65	0.64	0.65	0.69	0.77	0.83	0.85	0.87	0.87	0.87	0.79	0.78	0.82
DB331110	0	0	0	0	0	0	0	0.97	0.98	0.97	0.97	0.96	0.96	0.96	0.96	0.95	0.95	0.96	0.97	0.97	0.97	0.96	0.95	0.95	0.95	0.95	0.95	0.93	0.93	0.94	0.93	0.94	0.94	0.94	0.94	0.94	0.95	0.95	0.95	0.95	0.95	0.95	0.94	0.95	0.96	0.97	0.98	1	1
DB344099	0	0	0	0	0	0	0	0.93	0.92	0.93	0.93	0.93	0.95	0.95	0.93	0.92	0.92	0.9	0.91	0.91	0.9	0.91	0.92	0.91	0.9	0.89	0.9	0.9	0.91	0.93	0.94	0.95	0.92	0.92	0.92	0.95	0.95	0.95	0.95	0.97	0.95	0.96	0.96	0.96	0.95	0.96	0.96	0.97	0.97
DB478885	0	0	0	0	0	0	0	0.81	0.8	0.8	0.82	0.81	0.77	0.78	0.85	0.82	0.8	0.75	0.75	0.75	0.77	0.78	0.78	0.8	0.83	0.83	0.82	0.84	0.82	0.79	0.82	0.83	0.83	0.84	0.84	0.84	0.85	0.86	0.86	0.88	0.88	0.88	0.86	0.86	0.9	0.92	0.92	0.91	0.91
DB514539	0	0	0	0	0	0	0	0.73	0.62	0.54	0.46	0.44	0.41	0.43	0.43	0.41	0.4	0.42	0.41	0.39	0.39	0.39	0.38	0.38	0.37	0.39	0.42	0.4	0.38	0.37	0.36	0.37	0.38	0.38	0.38	0.37	0.36	0.39	0.39	0.44	0.46	0.5	0.55	0.56	0.54	0.53	0.53	0.52	0.54
DB522524	0	0	0	0	0	0	0	0.47	0.41	0.38	0.35	0.35	0.38	0.4	0.4	0.39	0.39	0.39	0.4	0.37	0.35	0.36	0.35	0.33	0.31	0.31	0.31	0.32	0.33	0.36	0.38	0.37	0.35	0.35	0.38	0.36	0.37	0.39	0.38	0.38	0.4	0.42	0.44	0.44	0.44	0.45	0.46	0.44	0.42
DC347972	0	0	0	0	0	0	0	0.7	0.64	0.61	0.575	0.55	0.535	0.52	0.525	0.515	0.51	0.515	0.51	0.515	0.51	0.535	0.55	0.56	0.57	0.58	0.575	0.57	0.58	0.595	0.58	0.59	0.585	0.585	0.595	0.595	0.6	0.605	0.605	0.62	0.62	0.615	0.625	0.61	0.615	0.625	0.635	0.64	0.645
DCBLD2	0	0	0	0	0	0	0	0.63	0.59	0.54	0.55	0.55	0.55	0.55	0.56	0.56	0.53	0.54	0.52	0.54	0.53	0.54	0.55	0.55	0.56	0.59	0.62	0.64	0.62	0.6	0.59	0.6	0.6	0.66	0.66	0.65	0.67	0.67	0.68	0.7	0.7	0.71	0.71	0.73	0.73	0.68	0.67	0.65	0.65
DDEF2	0	0	0	0	0	0	0	0.78	0.73	0.71	0.69	0.67	0.66	0.68	0.69	0.69	0.66	0.66	0.65	0.66	0.65	0.68	0.7	0.71	0.74	0.77	0.76	0.75	0.73	0.73	0.74	0.74	0.74	0.76	0.77	0.77	0.77	0.75	0.74	0.74	0.74	0.74	0.74	0.73	0.73	0.71	0.7	0.69	0.71
DDT	0	0	0	0	0	0	0	0.73	0.64	0.6	0.6	0.61	0.61	0.61	0.61	0.6	0.61	0.57	0.56	0.55	0.56	0.56	0.59	0.61	0.57	0.56	0.55	0.56	0.55	0.55	0.56	0.55	0.56	0.57	0.57	0.57	0.57	0.57	0.56	0.56	0.56	0.57	0.59	0.6	0.61	0.62	0.6	0.61	0.61
DDX10	0	0	0	0	0	0	0	0.76	0.71	0.7	0.68	0.67	0.67	0.67	0.68	0.68	0.71	0.73	0.73	0.73	0.73	0.72	0.73	0.72	0.7	0.71	0.7	0.7	0.69	0.67	0.66	0.65	0.66	0.72	0.74	0.75	0.74	0.74	0.71	0.72	0.7	0.71	0.75	0.75	0.75	0.77	0.78	0.75	0.74
DDX18	0	0	0	0	0	0	0	0.93	0.92	0.915	0.92	0.915	0.915	0.915	0.915	0.91	0.905	0.91	0.915	0.915	0.905	0.905	0.91	0.91	0.91	0.91	0.925	0.915	0.915	0.91	0.915	0.915	0.915	0.915	0.905	0.905	0.905	0.915	0.915	0.925	0.92	0.92	0.92	0.915	0.92	0.93	0.94	0.935	0.945
DDX46	0	0	0	0	0	0	0	0.76	0.71	0.675	0.66	0.64	0.63	0.625	0.62	0.63	0.62	0.62	0.61	0.61	0.62	0.615	0.625	0.625	0.64	0.63	0.645	0.645	0.64	0.64	0.66	0.67	0.675	0.695	0.675	0.65	0.65	0.65	0.655	0.66	0.65	0.64	0.63	0.625	0.63	0.625	0.64	0.655	0.655
DDX5	0	0	0	0	0	0	0	0.92	0.9217	0.9167	0.9117	0.9117	0.915	0.9133	0.9117	0.9167	0.9217	0.9183	0.9183	0.9183	0.9183	0.92	0.9217	0.92	0.9183	0.9217	0.9167	0.915	0.9183	0.9217	0.92	0.9217	0.92	0.9183	0.9183	0.92	0.9133	0.9183	0.9183	0.925	0.925	0.9283	0.9317	0.9333	0.9317	0.9317	0.9367	0.9367	0.9417
DEK	0	0	0	0	0	0	0	0.875	0.855	0.86	0.87	0.815	0.805	0.795	0.795	0.77	0.78	0.78	0.76	0.765	0.78	0.785	0.755	0.75	0.765	0.79	0.785	0.81	0.84	0.835	0.845	0.88	0.925	0.915	0.94	0.92	0.87	0.875	0.875	0.885	0.855	0.85	0.86	0.875	0.88	0.915	0.91	0.895	0.89
DHX15	0	0	0	0	0	0	0	0.9	0.895	0.895	0.9	0.89	0.895	0.895	0.9	0.905	0.905	0.905	0.91	0.905	0.905	0.9	0.895	0.89	0.89	0.92	0.92	0.92	0.92	0.92	0.91	0.915	0.915	0.92	0.92	0.915	0.915	0.915	0.91	0.915	0.915	0.92	0.92	0.925	0.93	0.935	0.945	0.945	0.95
DHX16	0	0	0	0	0	0	0	0.85	0.83	0.83	0.85	0.84	0.85	0.84	0.84	0.83	0.82	0.81	0.83	0.84	0.85	0.86	0.85	0.85	0.86	0.88	0.86	0.85	0.85	0.86	0.84	0.83	0.84	0.84	0.86	0.85	0.85	0.85	0.83	0.84	0.83	0.85	0.86	0.85	0.85	0.87	0.87	0.86	0.87
DKKL1	0	0	0	0	0	0	0	0.86	0.8	0.71	0.7	0.65	0.65	0.62	0.6	0.58	0.58	0.55	0.52	0.47	0.46	0.44	0.44	0.43	0.43	0.43	0.44	0.45	0.5	0.5	0.5	0.47	0.5	0.49	0.46	0.46	0.47	0.49	0.49	0.47	0.47	0.48	0.48	0.49	0.51	0.51	0.5	0.53	0.53
DMTF1	0	0	0	0	0	0	0	0.73	0.72	0.72	0.74	0.75	0.76	0.77	0.77	0.77	0.8	0.8	0.81	0.83	0.85	0.84	0.84	0.85	0.86	0.87	0.87	0.86	0.86	0.88	0.89	0.89	0.89	0.91	0.91	0.91	0.9	0.9	0.91	0.9	0.9	0.9	0.91	0.92	0.92	0.92	0.93	0.92	0.93
DNAJA1	0	0	0	0	0	0	0	0.77	0.67	0.6	0.53	0.51	0.49	0.49	0.49	0.47	0.43	0.46	0.46	0.48	0.46	0.45	0.48	0.54	0.55	0.54	0.55	0.56	0.57	0.59	0.56	0.56	0.49	0.49	0.52	0.53	0.52	0.51	0.49	0.53	0.53	0.53	0.54	0.55	0.58	0.58	0.58	0.56	0.55
DNAjC7	0	0	0	0	0	0	0	0.52	0.44	0.4	0.38	0.38	0.38	0.37	0.37	0.37	0.35	0.36	0.37	0.35	0.34	0.33	0.34	0.33	0.32	0.32	0.33	0.32	0.32	0.31	0.31	0.32	0.34	0.34	0.34	0.33	0.34	0.34	0.36	0.36	0.35	0.36	0.4	0.4	0.39	0.42	0.44	0.46	0.47
DNMT1	0	0	0	0	0	0	0	0.885	0.9	0.895	0.91	0.91	0.905	0.9	0.895	0.905	0.91	0.905	0.91	0.895	0.895	0.885	0.9	0.9	0.895	0.89	0.895	0.895	0.89	0.89	0.88	0.88	0.89	0.89	0.885	0.875	0.875	0.89	0.9	0.89	0.895	0.905	0.9	0.89	0.895	0.915	0.91	0.915	0.915
DYNC1H1	0	0	0	0	0	0	0	0.7	0.635	0.595	0.625	0.63	0.665	0.635	0.62	0.595	0.6	0.6	0.595	0.575	0.56	0.55	0.55	0.55	0.565	0.565	0.55	0.525	0.53	0.54	0.52	0.52	0.515	0.52	0.51	0.535	0.545	0.55	0.555	0.555	0.585	0.6	0.615	0.61	0.61	0.6	0.59	0.6	0.625
EED	0	0	0	0	0	0	0	0.83	0.82	0.81	0.81	0.81	0.8	0.81	0.81	0.82	0.82	0.81	0.81	0.82	0.83	0.83	0.83	0.85	0.84	0.84	0.83	0.82	0.83	0.83	0.83	0.85	0.87	0.87	0.86	0.87	0.88	0.89	0.88	0.89	0.89	0.9	0.89	0.9	0.91	0.9	0.91	0.92	0.94
EEF1A1	0	0	0	0	0	0	0	0.79	0.76	0.75	0.74	0.72	0.68	0.69	0.68	0.68	0.71	0.71	0.7	0.67	0.65	0.62	0.6	0.58	0.54	0.54	0.54	0.53	0.5	0.5	0.52	0.5	0.52	0.54	0.54	0.59	0.63	0.65	0.6	0.62	0.62	0.64	0.62	0.6	0.6	0.63	0.68	0.68	0.69
EEF1E1	0	0	0	0	0	0	0	0.79	0.72	0.69	0.64	0.63	0.62	0.6	0.56	0.56	0.57	0.62	0.62	0.64	0.64	0.67	0.65	0.66	0.67	0.68	0.69	0.68	0.69	0.68	0.72	0.7	0.69	0.66	0.67	0.67	0.66	0.65	0.66	0.68	0.69	0.69	0.7	0.72	0.7	0.7	0.69	0.71	0.72
EIF1AX	0	0	0	0	0	0	0	0.73	0.66	0.63	0.62	0.6	0.61	0.59	0.55	0.53	0.53	0.52	0.51	0.51	0.52	0.52	0.51	0.51	0.52	0.52	0.51	0.52	0.53	0.52	0.52	0.53	0.55	0.55	0.54	0.54	0.53	0.54	0.53	0.53	0.54	0.54	0.53	0.55	0.53	0.54	0.56	0.55	0.57
EIF2S3	0	0	0	0	0	0	0	0.9	0.85	0.83	0.82	0.8	0.8	0.77	0.77	0.76	0.77	0.76	0.74	0.74	0.78	0.77	0.79	0.78	0.79	0.78	0.78	0.8	0.8	0.79	0.79	0.77	0.76	0.78	0.78	0.8	0.81	0.8	0.82	0.83	0.85	0.86	0.87	0.85	0.85	0.84	0.84	0.85	0.87
EIF3K	0	0	0	0	0	0	0	0.806	0.776	0.752	0.752	0.728	0.722	0.724	0.73	0.724	0.716	0.736	0.736	0.716	0.712	0.71	0.708	0.728	0.742	0.726	0.72	0.718	0.722	0.722	0.734	0.732	0.726	0.73	0.732	0.72	0.734	0.742	0.73	0.724	0.732	0.744	0.76	0.768	0.756	0.742	0.756	0.774	0.784
EIF3S10	0	0	0	0	0	0	0	0.9	0.85	0.77	0.76	0.71	0.68	0.64	0.62	0.62	0.61	0.57	0.51	0.46	0.4	0.37	0.32	0.3	0.29	0.28	0.27	0.29	0.34	0.35	0.36	0.36	0.34	0.38	0.39	0.38	0.37	0.37	0.36	0.37	0.4	0.42	0.46	0.45	0.45	0.45	0.48	0.44	0.42
EIF4A1	0	0	0	0	0	0	0	0.75	0.69	0.68	0.65	0.59	0.62	0.6	0.57	0.44	0.44	0.45	0.45	0.46	0.47	0.45	0.48	0.46	0.53	0.5	0.52	0.54	0.58	0.5	0.49	0.5	0.52	0.54	0.54	0.56	0.56	0.57	0.58	0.55	0.54	0.52	0.51	0.43	0.39	0.38	0.38	0.45	0.45
EIF4E2	0	0	0	0	0	0	0	0.76	0.78	0.79	0.74	0.66	0.66	0.77	0.75	0.83	0.78	0.79	0.69	0.71	0.68	0.69	0.67	0.69	0.7	0.7	0.7	0.73	0.73	0.71	0.71	0.71	0.68	0.68	0.68	0.69	0.7	0.78	0.81	0.8	0.79	0.8	0.78	0.78	0.73	0.71	0.7	0.72	0.76
EIF4EBP1	0	0	0	0	0	0	0	0.89	0.94	0.89	0.81	0.79	0.81	0.81	0.82	0.81	0.77	0.76	0.79	0.78	0.77	0.71	0.7	0.74	0.76	0.73	0.71	0.64	0.63	0.62	0.62	0.63	0.66	0.67	0.67	0.64	0.62	0.6	0.64	0.66	0.64	0.64	0.63	0.62	0.57	0.57	0.56	0.56	0.63
EIF4H	0	0	0	0	0	0	0	0.67	0.63	0.585	0.555	0.535	0.52	0.54	0.56	0.545	0.54	0.56	0.555	0.515	0.495	0.5	0.505	0.495	0.48	0.495	0.5	0.505	0.51	0.54	0.525	0.505	0.475	0.47	0.47	0.48	0.49	0.495	0.535	0.55	0.55	0.57	0.575	0.585	0.57	0.55	0.56	0.57	0.595
EIF5B	0	0	0	0	0	0	0	0.67	0.605	0.6	0.6	0.59	0.565	0.53	0.54	0.54	0.53	0.52	0.52	0.525	0.495	0.49	0.495	0.52	0.555	0.565	0.59	0.62	0.64	0.63	0.635	0.645	0.63	0.615	0.635	0.665	0.645	0.675	0.705	0.695	0.61	0.615	0.615	0.635	0.6	0.595	0.58	0.585	0.605
EMP3	0	0	0	0	0	0	0	0.76	0.76	0.83	0.82	0.84	0.83	0.8	0.75	0.75	0.76	0.71	0.67	0.7	0.76	0.66	0.82	0.92	0.86	0.81	0.76	0.79	0.81	0.79	0.75	0.75	0.77	0.8	0.82	0.74	0.68	0.76	0.76	0.75	0.8	0.78	0.76	0.78	0.8	0.85	0.83	0.88	0.85
ENO1	0	0	0	0	0	0	0	0.6575	0.6025	0.58	0.56	0.55	0.5325	0.54	0.5425	0.5375	0.52	0.5125	0.5125	0.5275	0.5225	0.5125	0.515	0.5125	0.515	0.5125	0.51	0.5225	0.5275	0.525	0.5425	0.5225	0.5275	0.5325	0.55	0.5425	0.54	0.5425	0.57	0.5625	0.565	0.565	0.575	0.5625	0.5475	0.5625	0.565	0.58	0.58
FABP5	0	0	0	0	0	0	0	0.73	0.65	0.595	0.575	0.56	0.555	0.535	0.525	0.515	0.505	0.495	0.495	0.5	0.49	0.485	0.49	0.485	0.495	0.495	0.49	0.48	0.475	0.485	0.48	0.485	0.485	0.49	0.505	0.515	0.525	0.52	0.52	0.535	0.55	0.565	0.55	0.555	0.55	0.545	0.545	0.555	0.56
FAM128A	0	0	0	0	0	0	0	0.9	0.92	0.92	0.93	0.93	0.93	0.94	0.94	0.94	0.94	0.94	0.94	0.94	0.94	0.93	0.93	0.94	0.94	0.94	0.94	0.94	0.94	0.95	0.94	0.94	0.94	0.95	0.95	0.94	0.94	0.94	0.95	0.96	0.95	0.96	0.95	0.95	0.96	0.96	0.97	0.96	0.96
FAM44A	0	0	0	0	0	0	0	0.59	0.47	0.4	0.4	0.39	0.38	0.42	0.52	0.53	0.52	0.47	0.46	0.5	0.55	0.52	0.52	0.5	0.5	0.47	0.43	0.44	0.44	0.48	0.49	0.48	0.48	0.51	0.5	0.49	0.57	0.56	0.56	0.56	0.55	0.53	0.55	0.61	0.62	0.6	0.61	0.61	0.61
FAM86A	0	0	0	0	0	0	0	0.72	0.68	0.63	0.61	0.59	0.58	0.6	0.57	0.51	0.48	0.47	0.51	0.49	0.47	0.46	0.44	0.43	0.45	0.48	0.53	0.56	0.57	0.56	0.57	0.58	0.56	0.59	0.59	0.56	0.54	0.54	0.53	0.54	0.51	0.51	0.5	0.58	0.59	0.59	0.56	0.57	0.64
FAU	0	0	0	0	0	0	0	0.9033	0.9	0.89	0.8767	0.8733	0.8767	0.88	0.8833	0.8767	0.8767	0.87	0.8667	0.8667	0.8733	0.8667	0.8467	0.8433	0.8233	0.8133	0.8067	0.8067	0.79	0.7933	0.8033	0.7967	0.79	0.8333	0.8367	0.8367	0.8433	0.85	0.8567	0.8633	0.8833	0.9133	0.92	0.93	0.9367	0.9467	0.9433	0.9533	0.9533
FER1L3	0	0	0	0	0	0	0	0.53	0.52	0.52	0.51	0.53	0.51	0.51	0.49	0.5	0.52	0.51	0.48	0.44	0.42	0.43	0.44	0.41	0.4	0.39	0.41	0.41	0.44	0.43	0.43	0.45	0.46	0.49	0.5	0.51	0.52	0.52	0.52	0.54	0.57	0.59	0.61	0.63	0.63	0.64	0.63	0.61	0.62
FLJ20105	0	0	0	0	0	0	0	0.62	0.51	0.43	0.39	0.37	0.38	0.38	0.38	0.4	0.42	0.43	0.43	0.41	0.35	0.35	0.37	0.39	0.38	0.4	0.39	0.42	0.39	0.38	0.4	0.42	0.41	0.41	0.37	0.38	0.38	0.39	0.38	0.38	0.35	0.36	0.36	0.36	0.39	0.39	0.4	0.43	0.46
FLJ20674	0	0	0	0	0	0	0	0.86	0.79	0.73	0.74	0.77	0.76	0.75	0.77	0.77	0.74	0.74	0.74	0.75	0.73	0.65	0.64	0.66	0.66	0.64	0.6	0.61	0.66	0.66	0.63	0.62	0.6	0.62	0.62	0.63	0.63	0.63	0.62	0.61	0.68	0.69	0.71	0.72	0.76	0.8	0.81	0.84	0.84
FLJ21908	0	0	0	0	0	0	0	0.81	0.78	0.76	0.79	0.82	0.78	0.8	0.79	0.8	0.81	0.8	0.8	0.82	0.83	0.82	0.8	0.8	0.82	0.83	0.84	0.86	0.88	0.91	0.91	0.91	0.89	0.88	0.87	0.86	0.85	0.84	0.85	0.88	0.88	0.89	0.91	0.9	0.91	0.91	0.91	0.9	0.9
FLJ31951	0	0	0	0	0	0	0	0.81	0.77	0.73	0.7	0.66	0.65	0.63	0.6	0.56	0.51	0.5	0.49	0.47	0.44	0.43	0.41	0.34	0.35	0.35	0.36	0.36	0.34	0.32	0.32	0.36	0.37	0.39	0.38	0.35	0.35	0.33	0.34	0.37	0.38	0.38	0.38	0.46	0.49	0.46	0.49	0.47	0.44
FLNB	0	0	0	0	0	0	0	0.55	0.5	0.46	0.44	0.44	0.45	0.49	0.49	0.48	0.55	0.47	0.49	0.5	0.5	0.5	0.49	0.44	0.4	0.34	0.33	0.42	0.41	0.4	0.36	0.46	0.44	0.47	0.46	0.42	0.41	0.37	0.36	0.37	0.35	0.39	0.42	0.41	0.36	0.4	0.42	0.44	0.45
FOSL1	0	0	0	0	0	0	0	0.59	0.55	0.58	0.61	0.64	0.63	0.64	0.67	0.65	0.65	0.61	0.61	0.61	0.62	0.65	0.66	0.66	0.66	0.65	0.66	0.68	0.68	0.68	0.63	0.62	0.63	0.63	0.64	0.64	0.62	0.59	0.6	0.61	0.58	0.6	0.59	0.59	0.61	0.63	0.62	0.63	0.64
FSCN1	0	0	0	0	0	0	0	0.695	0.595	0.525	0.495	0.465	0.475	0.47	0.435	0.435	0.445	0.415	0.415	0.43	0.44	0.415	0.415	0.425	0.45	0.46	0.45	0.465	0.495	0.495	0.5	0.495	0.5	0.495	0.495	0.48	0.48	0.48	0.465	0.48	0.48	0.49	0.495	0.5	0.48	0.48	0.475	0.485	0.51
FUBP1	0	0	0	0	0	0	0	0.59	0.53	0.54	0.56	0.55	0.57	0.56	0.54	0.52	0.51	0.48	0.5	0.51	0.49	0.5	0.53	0.52	0.5	0.5	0.53	0.52	0.51	0.53	0.53	0.54	0.54	0.58	0.61	0.62	0.63	0.62	0.62	0.6	0.59	0.59	0.62	0.63	0.65	0.65	0.64	0.64	0.65
GABARAP	0	0	0	0	0	0	0	0.51	0.45	0.43	0.42	0.42	0.42	0.43	0.42	0.4	0.39	0.36	0.35	0.35	0.35	0.35	0.35	0.35	0.36	0.35	0.35	0.35	0.34	0.35	0.36	0.37	0.37	0.37	0.37	0.37	0.38	0.37	0.37	0.39	0.39	0.39	0.39	0.38	0.38	0.38	0.37	0.37	0.37
GALNT2	0	0	0	0	0	0	0	0.95	0.91	0.87	0.84	0.79	0.76	0.74	0.72	0.69	0.69	0.68	0.68	0.67	0.63	0.6	0.59	0.6	0.6	0.61	0.61	0.6	0.6	0.62	0.68	0.68	0.69	0.69	0.71	0.7	0.67	0.65	0.66	0.7	0.69	0.72	0.76	0.79	0.84	0.84	0.82	0.83	0.84
GAP43	0	0	0	0	0	0	0	0.89	0.92	0.98	0.99	0.99	0.99	1	0.94	0.91	0.94	0.85	0.78	0.79	0.81	0.83	0.82	0.79	0.81	0.83	0.83	0.76	0.74	0.77	0.78	0.83	0.82	0.74	0.71	0.7	0.7	0.7	0.73	0.73	0.74	0.79	0.82	0.87	0.86	0.87	0.88	0.9	0.83
GLO1	0	0	0	0	0	0	0	0.66	0.59	0.53	0.51	0.51	0.52	0.53	0.52	0.53	0.52	0.52	0.53	0.53	0.55	0.57	0.57	0.56	0.58	0.58	0.6	0.58	0.62	0.6	0.62	0.61	0.62	0.61	0.58	0.59	0.6	0.59	0.58	0.59	0.59	0.6	0.61	0.62	0.63	0.61	0.62	0.6	0.59
GLRX	0	0	0	0	0	0	0	0.68	0.62	0.57	0.54	0.52	0.51	0.53	0.55	0.55	0.54	0.56	0.56	0.56	0.57	0.57	0.58	0.6	0.6	0.61	0.64	0.67	0.67	0.66	0.65	0.65	0.63	0.62	0.64	0.67	0.66	0.65	0.63	0.64	0.65	0.66	0.66	0.66	0.65	0.64	0.64	0.63	0.63
GNB2L1	0	0	0	0	0	0	0	0.72	0.64	0.625	0.63	0.62	0.62	0.605	0.585	0.57	0.57	0.565	0.56	0.56	0.555	0.56	0.565	0.555	0.555	0.545	0.555	0.545	0.555	0.57	0.59	0.58	0.57	0.575	0.555	0.545	0.545	0.575	0.595	0.61	0.605	0.61	0.63	0.64	0.655	0.665	0.655	0.645	0.655
GNG11	0	0	0	0	0	0	0	0.85	0.85	0.82	0.75	0.74	0.71	0.62	0.57	0.54	0.53	0.53	0.56	0.51	0.54	0.55	0.54	0.51	0.47	0.48	0.5	0.5	0.46	0.46	0.43	0.43	0.45	0.45	0.46	0.53	0.55	0.52	0.52	0.56	0.59	0.55	0.51	0.49	0.52	0.55	0.58	0.6	0.52
GSPT1	0	0	0	0	0	0	0	0.51	0.51	0.56	0.59	0.57	0.54	0.51	0.49	0.48	0.51	0.52	0.5	0.49	0.5	0.49	0.5	0.51	0.5	0.48	0.47	0.46	0.43	0.43	0.47	0.45	0.49	0.52	0.52	0.59	0.51	0.53	0.54	0.56	0.5	0.51	0.49	0.52	0.56	0.56	0.52	0.54	0.56
GTF2F2	0	0	0	0	0	0	0	0.8	0.7633	0.7467	0.74	0.7333	0.7233	0.74	0.7433	0.7433	0.7367	0.73	0.73	0.7267	0.73	0.7167	0.7133	0.7067	0.71	0.7133	0.73	0.74	0.76	0.77	0.7833	0.7767	0.7667	0.78	0.7933	0.8067	0.81	0.8	0.7933	0.8	0.79	0.7933	0.79	0.8	0.8033	0.8167	0.8267	0.8367	0.84
HAT1	0	0	0	0	0	0	0	0.7	0.67	0.69	0.7	0.71	0.75	0.76	0.76	0.78	0.79	0.78	0.8	0.82	0.82	0.82	0.83	0.85	0.86	0.86	0.88	0.87	0.85	0.83	0.84	0.84	0.84	0.84	0.85	0.87	0.87	0.88	0.9	0.9	0.91	0.91	0.91	0.91	0.89	0.9	0.89	0.88	0.88
HDAC2	0	0	0	0	0	0	0	0.6875	0.605	0.5775	0.5625	0.5575	0.5625	0.5575	0.5625	0.5675	0.5725	0.575	0.5675	0.5625	0.5775	0.5875	0.5975	0.595	0.61	0.62	0.6125	0.6125	0.61	0.6075	0.61	0.6	0.5925	0.6125	0.6175	0.64	0.6525	0.645	0.6425	0.645	0.6525	0.6625	0.67	0.6725	0.6775	0.685	0.7	0.715	0.7175
HMG2L1	0	0	0	0	0	0	0	0.8	0.81	0.81	0.82	0.82	0.81	0.8	0.8	0.81	0.82	0.82	0.81	0.83	0.85	0.85	0.85	0.86	0.84	0.83	0.83	0.83	0.83	0.82	0.82	0.83	0.82	0.85	0.86	0.87	0.86	0.85	0.87	0.87	0.85	0.86	0.84	0.84	0.88	0.89	0.88	0.91	0.91
HMGA2	0	0	0	0	0	0	0	0.93	0.92	0.91	0.91	0.91	0.91	0.92	0.92	0.93	0.92	0.93	0.94	0.95	0.94	0.94	0.95	0.95	0.96	0.96	0.96	0.97	0.96	0.96	0.96	0.95	0.96	0.96	0.94	0.96	0.97	0.96	0.95	0.96	0.96	0.97	0.98	0.99	0.98	0.95	0.95	0.96	0.96
HMGB1	0	0	0	0	0	0	0	0.66	0.61	0.58	0.58	0.57	0.56	0.52	0.49	0.42	0.4	0.4	0.41	0.4	0.4	0.39	0.42	0.38	0.37	0.37	0.34	0.34	0.41	0.47	0.46	0.44	0.42	0.42	0.41	0.42	0.43	0.45	0.49	0.49	0.51	0.53	0.58	0.6	0.58	0.56	0.58	0.62	0.65
HMGN2	0	0	0	0	0	0	0	0.765	0.72	0.69	0.675	0.675	0.7	0.695	0.695	0.68	0.675	0.67	0.67	0.665	0.675	0.68	0.675	0.675	0.685	0.69	0.69	0.685	0.685	0.7	0.695	0.69	0.69	0.69	0.695	0.705	0.705	0.7	0.695	0.695	0.71	0.715	0.72	0.715	0.72	0.715	0.715	0.72	0.75
HMGN3	0	0	0	0	0	0	0	0.92	0.89	0.81	0.79	0.79	0.79	0.8	0.82	0.84	0.84	0.87	0.89	0.88	0.88	0.89	0.84	0.84	0.82	0.83	0.86	0.87	0.87	0.87	0.87	0.86	0.88	0.87	0.9	0.89	0.89	0.87	0.87	0.86	0.89	0.89	0.87	0.82	0.85	0.87	0.95	0.95	0.94
HMMR	0	0	0	0	0	0	0	0.94	0.94	0.95	0.95	0.94	0.95	0.96	0.98	0.98	0.98	0.98	0.98	0.98	0.96	0.97	0.97	0.94	0.95	0.92	0.94	0.95	0.93	0.95	0.96	0.97	0.97	0.98	0.97	0.97	0.97	0.98	0.98	0.97	0.97	0.97	0.97	0.98	0.97	0.99	0.99	0.98	0.97
HN1	0	0	0	0	0	0	0	0.725	0.635	0.58	0.54	0.505	0.465	0.395	0.385	0.375	0.365	0.36	0.355	0.35	0.365	0.39	0.39	0.4	0.4	0.395	0.42	0.405	0.41	0.43	0.43	0.415	0.39	0.38	0.395	0.38	0.39	0.395	0.415	0.445	0.445	0.455	0.475	0.485	0.49	0.495	0.505	0.545	0.56
HNRPA1	0	0	0	0	0	0	0	0.94	0.93	0.91	0.91	0.92	0.92	0.93	0.93	0.92	0.92	0.91	0.91	0.92	0.93	0.93	0.93	0.94	0.93	0.93	0.93	0.93	0.94	0.95	0.94	0.94	0.94	0.94	0.94	0.94	0.94	0.94	0.94	0.95	0.96	0.96	0.96	0.96	0.96	0.96	0.96	0.96	0.96
HNRPA2B1	0	0	0	0	0	0	0	0.96	0.96	0.97	0.96	0.97	0.98	0.97	0.96	0.96	0.96	0.96	0.95	0.95	0.94	0.95	0.95	0.94	0.95	0.95	0.96	0.95	0.96	0.96	0.96	0.96	0.97	0.98	0.98	0.97	0.97	0.96	0.96	0.97	0.98	0.97	0.98	0.98	0.98	0.98	0.98	0.98	0.99
HNRPA3	0	0	0	0	0	0	0	0.95	0.93	0.92	0.91	0.91	0.91	0.91	0.9	0.9	0.9	0.91	0.91	0.91	0.91	0.9	0.91	0.91	0.92	0.93	0.94	0.95	0.94	0.95	0.95	0.94	0.94	0.94	0.94	0.94	0.94	0.95	0.95	0.95	0.95	0.95	0.94	0.95	0.94	0.95	0.95	0.94	0.95
HNRPC	0	0	0	0	0	0	0	0.78	0.75	0.76	0.75	0.735	0.735	0.72	0.695	0.71	0.73	0.745	0.745	0.73	0.745	0.755	0.77	0.785	0.79	0.8	0.795	0.78	0.775	0.79	0.805	0.815	0.81	0.76	0.755	0.8	0.82	0.805	0.795	0.785	0.78	0.775	0.765	0.785	0.785	0.775	0.775	0.78	0.755
HNRPD	0	0	0	0	0	0	0	0.47	0.46	0.46	0.46	0.45	0.46	0.48	0.45	0.44	0.42	0.41	0.41	0.44	0.45	0.47	0.52	0.53	0.54	0.55	0.57	0.6	0.6	0.61	0.62	0.62	0.64	0.63	0.69	0.64	0.48	0.51	0.5	0.47	0.47	0.47	0.46	0.49	0.51	0.52	0.52	0.5	0.5
HNRPM	0	0	0	0	0	0	0	0.8	0.77	0.79	0.82	0.87	0.89	0.89	0.88	0.87	0.86	0.86	0.88	0.88	0.89	0.92	0.91	0.91	0.9	0.92	0.9	0.89	0.92	0.91	0.89	0.91	0.91	0.92	0.92	0.92	0.91	0.89	0.88	0.88	0.89	0.89	0.9	0.87	0.87	0.88	0.86	0.86	0.87
HSP90AA1	0	0	0	0	0	0	0	0.5925	0.5325	0.5175	0.52	0.525	0.5225	0.525	0.52	0.505	0.505	0.495	0.49	0.49	0.485	0.4875	0.4725	0.4675	0.4775	0.4925	0.4925	0.49	0.495	0.49	0.4825	0.4775	0.4725	0.485	0.4825	0.4875	0.4875	0.5025	0.5075	0.515	0.5	0.515	0.515	0.5125	0.515	0.5225	0.5175	0.52	0.5275
HSP90AB1	0	0	0	0	0	0	0	0.59	0.57	0.59	0.58	0.56	0.53	0.54	0.56	0.57	0.57	0.53	0.48	0.49	0.48	0.5	0.54	0.55	0.54	0.56	0.59	0.61	0.65	0.64	0.61	0.63	0.64	0.64	0.61	0.58	0.58	0.61	0.62	0.65	0.66	0.66	0.62	0.61	0.61	0.62	0.63	0.59	0.57
HSPCA	0	0	0	0	0	0	0	0.59	0.53	0.51	0.5	0.5	0.48	0.53	0.52	0.49	0.49	0.46	0.45	0.43	0.41	0.4	0.4	0.39	0.41	0.42	0.44	0.45	0.45	0.44	0.43	0.43	0.45	0.44	0.44	0.43	0.42	0.41	0.41	0.42	0.45	0.49	0.49	0.47	0.49	0.51	0.5	0.51	0.5
HYPA	0	0	0	0	0	0	0	0.93	0.93	0.93	0.93	0.92	0.92	0.93	0.92	0.92	0.92	0.93	0.93	0.94	0.93	0.94	0.94	0.94	0.94	0.94	0.95	0.94	0.94	0.94	0.94	0.94	0.94	0.94	0.94	0.95	0.96	0.96	0.95	0.95	0.96	0.96	0.97	0.97	0.96	0.96	0.97	0.97	0.97
IFT20	0	0	0	0	0	0	0	0.68	0.63	0.56	0.53	0.52	0.52	0.55	0.55	0.52	0.49	0.48	0.46	0.53	0.59	0.57	0.55	0.56	0.58	0.58	0.56	0.54	0.54	0.55	0.56	0.59	0.6	0.59	0.59	0.58	0.57	0.57	0.59	0.65	0.66	0.64	0.62	0.63	0.64	0.65	0.64	0.68	0.74
IL3RA	0	0	0	0	0	0	0	0.7633	0.72	0.6967	0.6867	0.6833	0.6667	0.66	0.6567	0.65	0.64	0.6367	0.6433	0.6567	0.66	0.6733	0.6767	0.6667	0.66	0.6567	0.6567	0.6567	0.6433	0.6433	0.6567	0.6567	0.6633	0.67	0.67	0.6767	0.6867	0.6833	0.6967	0.7	0.7067	0.7	0.7033	0.69	0.6967	0.6967	0.7033	0.7133	0.7267
ILF2	0	0	0	0	0	0	0	0.85	0.85	0.84	0.84	0.84	0.84	0.84	0.85	0.84	0.84	0.86	0.86	0.85	0.85	0.85	0.85	0.86	0.87	0.88	0.87	0.85	0.85	0.86	0.86	0.87	0.85	0.86	0.88	0.89	0.88	0.9	0.89	0.87	0.87	0.86	0.86	0.86	0.87	0.89	0.87	0.87	0.87
INPP4B	0	0	0	0	0	0	0	0.71	0.66	0.61	0.56	0.53	0.51	0.5	0.51	0.49	0.5	0.52	0.5	0.48	0.48	0.5	0.49	0.54	0.54	0.51	0.51	0.49	0.46	0.5	0.52	0.52	0.53	0.55	0.56	0.54	0.57	0.57	0.56	0.52	0.53	0.54	0.52	0.52	0.53	0.53	0.57	0.55	0.52
ISOC1	0	0	0	0	0	0	0	0.68	0.63	0.63	0.64	0.61	0.61	0.63	0.63	0.65	0.6	0.56	0.55	0.54	0.52	0.48	0.48	0.47	0.47	0.5	0.52	0.5	0.47	0.48	0.49	0.5	0.5	0.51	0.5	0.5	0.49	0.52	0.54	0.56	0.56	0.56	0.58	0.6	0.61	0.57	0.57	0.61	0.6
JAGN1	0	0	0	0	0	0	0	0.62	0.54	0.48	0.57	0.6	0.67	0.65	0.64	0.66	0.65	0.61	0.59	0.57	0.59	0.62	0.67	0.69	0.64	0.65	0.68	0.71	0.74	0.72	0.75	0.74	0.8	1.1	1.12	0.95	0.79	0.84	0.82	0.84	0.85	0.84	0.67	0.68	0.84	0.81	0.77	0.67	0.67
KATNA1	0	0	0	0	0	0	0	0.47	0.45	0.48	0.53	0.5	0.46	0.48	0.51	0.47	0.46	0.48	0.47	0.49	0.5	0.5	0.47	0.48	0.52	0.54	0.58	0.51	0.42	0.37	0.39	0.39	0.36	0.37	0.35	0.35	0.36	0.36	0.35	0.37	0.36	0.36	0.36	0.37	0.41	0.44	0.5	0.53	0.58
KIAA0802	0	0	0	0	0	0	0	0.86	0.88	0.89	0.9	0.91	0.91	0.91	0.91	0.92	0.91	0.91	0.92	0.91	0.91	0.91	0.91	0.91	0.9	0.91	0.9	0.9	0.9	0.92	0.93	0.93	0.93	0.93	0.92	0.93	0.93	0.93	0.93	0.93	0.93	0.93	0.93	0.92	0.94	0.94	0.94	0.95	0.95
KIAA1430	0	0	0	0	0	0	0	0.91	0.92	0.92	0.93	0.93	0.93	0.9	0.91	0.91	0.91	0.95	0.93	0.91	0.92	0.94	0.93	0.93	0.93	0.92	0.91	0.91	0.91	0.91	0.9	0.91	0.91	0.89	0.89	0.87	0.89	0.89	0.9	0.92	0.91	0.92	0.93	0.94	0.98	1	0.99	0.99	0.98
KLHL31	0	0	0	0	0	0	0	0.9	0.89	0.89	0.9	0.9	0.9	0.9	0.93	0.93	0.93	0.9	0.89	0.9	0.9	0.89	0.9	0.91	0.91	0.9	0.9	0.91	0.91	0.92	0.92	0.93	0.92	0.91	0.91	0.91	0.92	0.93	0.92	0.93	0.93	0.93	0.93	0.94	0.93	0.93	0.94	0.94	0.95
LARP1	0	0	0	0	0	0	0	0.63	0.57	0.52	0.46	0.43	0.51	0.54	0.53	0.52	0.51	0.57	0.56	0.55	0.62	0.7	0.67	0.67	0.67	0.65	0.68	0.68	0.77	0.76	0.74	0.73	0.72	0.66	0.65	0.6	0.54	0.55	0.53	0.5	0.41	0.45	0.46	0.52	0.51	0.53	0.5	0.5	0.48
LETM2	0	0	0	0	0	0	0	0.86	0.87	0.87	0.86	0.85	0.84	0.85	0.85	0.86	0.87	0.87	0.87	0.88	0.88	0.88	0.88	0.87	0.87	0.88	0.88	0.89	0.89	0.9	0.89	0.9	0.9	0.91	0.91	0.91	0.91	0.91	0.9	0.9	0.92	0.92	0.92	0.91	0.9	0.91	0.92	0.91	0.92
LGALS1	0	0	0	0	0	0	0	0.49	0.48	0.48	0.48	0.48	0.48	0.48	0.48	0.49	0.49	0.5	0.5	0.51	0.51	0.51	0.51	0.52	0.52	0.52	0.52	0.53	0.54	0.55	0.54	0.54	0.54	0.55	0.55	0.56	0.56	0.56	0.57	0.57	0.57	0.57	0.58	0.59	0.59	0.59	0.59	0.6	0.6
LIMA1	0	0	0	0	0	0	0	0.59	0.61	0.63	0.66	0.67	0.68	0.69	0.69	0.66	0.64	0.64	0.64	0.62	0.65	0.66	0.66	0.66	0.65	0.63	0.64	0.65	0.65	0.64	0.63	0.62	0.63	0.65	0.65	0.65	0.67	0.66	0.66	0.68	0.68	0.69	0.69	0.69	0.67	0.68	0.68	0.68	0.68
LMNA	0	0	0	0	0	0	0	0.61	0.56	0.54	0.55	0.57	0.57	0.57	0.55	0.57	0.53	0.51	0.5	0.5	0.5	0.46	0.44	0.43	0.44	0.44	0.46	0.45	0.44	0.44	0.45	0.45	0.45	0.52	0.54	0.51	0.48	0.48	0.47	0.47	0.47	0.49	0.49	0.48	0.46	0.44	0.47	0.54	0.53
LOC284184	0	0	0	0	0	0	0	0.8	0.75	0.71	0.7	0.7	0.71	0.71	0.69	0.68	0.7	0.67	0.66	0.64	0.64	0.65	0.65	0.64	0.64	0.63	0.62	0.62	0.62	0.62	0.59	0.58	0.58	0.58	0.58	0.57	0.57	0.6	0.62	0.66	0.67	0.68	0.66	0.65	0.66	0.68	0.7	0.7	0.71
LOC441161	0	0	0	0	0	0	0	0.77	0.69	0.66	0.64	0.63	0.64	0.63	0.63	0.65	0.63	0.63	0.63	0.61	0.64	0.64	0.65	0.64	0.64	0.62	0.63	0.61	0.61	0.63	0.63	0.63	0.62	0.61	0.63	0.64	0.65	0.63	0.62	0.62	0.61	0.62	0.62	0.62	0.62	0.63	0.64	0.66	0.66
LOC728776	0	0	0	0	0	0	0	0.84	0.82	0.8	0.79	0.79	0.8	0.84	0.83	0.83	0.82	0.82	0.83	0.82	0.84	0.84	0.84	0.84	0.85	0.85	0.83	0.84	0.85	0.84	0.83	0.86	0.86	0.88	0.87	0.88	0.87	0.88	0.87	0.86	0.88	0.9	0.88	0.88	0.87	0.84	0.84	0.84	0.87
LONRF3	0	0	0	0	0	0	0	0.81	0.77	0.74	0.72	0.68	0.76	0.77	0.77	0.76	0.74	0.75	0.77	0.77	0.77	0.76	0.76	0.77	0.75	0.73	0.69	0.71	0.72	0.68	0.65	0.67	0.69	0.7	0.71	0.72	0.74	0.76	0.77	0.78	0.76	0.76	0.74	0.73	0.76	0.77	0.77	0.77	0.74
LOXL2	0	0	0	0	0	0	0	0.78	0.76	0.75	0.77	0.8	0.77	0.74	0.73	0.74	0.74	0.73	0.7	0.69	0.68	0.68	0.65	0.63	0.62	0.64	0.63	0.65	0.66	0.68	0.68	0.66	0.64	0.64	0.65	0.65	0.67	0.69	0.73	0.74	0.75	0.75	0.76	0.77	0.76	0.8	0.79	0.78	0.77
LPIN2	0	0	0	0	0	0	0	0.9233	0.9033	0.8833	0.8733	0.88	0.8933	0.9067	0.9167	0.9033	0.9033	0.9	0.9033	0.9133	0.9133	0.9133	0.9133	0.9267	0.9233	0.9233	0.9067	0.89	0.89	0.9033	0.93	0.9267	0.9067	0.9067	0.9267	0.9333	0.9367	0.9467	0.94	0.94	0.9533	0.9567	0.9533	0.9567	0.96	0.96	0.95	0.95	0.9467
LRRC59	0	0	0	0	0	0	0	0.82	0.74	0.66	0.62	0.64	0.65	0.67	0.66	0.63	0.64	0.6	0.59	0.58	0.56	0.55	0.56	0.55	0.58	0.58	0.55	0.56	0.56	0.56	0.55	0.54	0.55	0.58	0.58	0.57	0.54	0.59	0.6	0.63	0.62	0.61	0.62	0.62	0.64	0.65	0.71	0.76	0.76
LRRFIP1	0	0	0	0	0	0	0	0.44	0.39	0.36	0.34	0.35	0.36	0.36	0.35	0.34	0.31	0.31	0.31	0.29	0.29	0.29	0.3	0.29	0.28	0.3	0.33	0.33	0.33	0.36	0.37	0.33	0.33	0.31	0.35	0.38	0.39	0.42	0.41	0.38	0.37	0.42	0.42	0.45	0.45	0.5	0.49	0.5	0.51
LSM3	0	0	0	0	0	0	0	0.89	0.84	0.85	0.86	0.88	0.88	0.87	0.86	0.89	0.88	0.89	0.9	0.88	0.88	0.88	0.84	0.81	0.82	0.88	0.9	0.92	0.89	0.86	0.87	0.87	0.83	0.83	0.81	0.82	0.83	0.85	0.85	0.83	0.82	0.83	0.84	0.87	0.9	0.88	0.84	0.83	0.85
LYAR	0	0	0	0	0	0	0	0.56	0.47	0.48	0.53	0.59	0.59	0.58	0.57	0.52	0.48	0.47	0.5	0.49	0.5	0.52	0.53	0.54	0.53	0.54	0.52	0.52	0.52	0.54	0.53	0.53	0.51	0.49	0.49	0.46	0.45	0.44	0.41	0.46	0.52	0.54	0.6	0.61	0.61	0.53	0.53	0.53	0.53
MAP2K2	0	0	0	0	0	0	0	0.59	0.52	0.43	0.43	0.43	0.43	0.41	0.39	0.38	0.39	0.38	0.39	0.38	0.38	0.38	0.38	0.39	0.39	0.39	0.43	0.43	0.43	0.42	0.45	0.44	0.42	0.42	0.4	0.37	0.4	0.39	0.39	0.39	0.41	0.41	0.43	0.43	0.45	0.47	0.48	0.49	0.53
MAPK1	0	0	0	0	0	0	0	0.57	0.52	0.49	0.46	0.44	0.43	0.43	0.41	0.43	0.4	0.41	0.41	0.4	0.4	0.41	0.41	0.42	0.43	0.45	0.43	0.46	0.5	0.51	0.48	0.45	0.42	0.39	0.4	0.4	0.4	0.42	0.47	0.45	0.41	0.41	0.43	0.44	0.47	0.49	0.49	0.5	0.51
MAPKAP1	0	0	0	0	0	0	0	0.96	0.95	0.95	0.95	0.96	0.96	0.96	0.97	0.97	0.97	0.97	0.96	0.96	0.96	0.97	0.97	0.96	0.96	0.97	0.97	0.96	0.96	0.96	0.97	0.97	0.96	0.95	0.96	0.96	0.97	0.97	0.98	0.98	0.98	0.99	0.98	0.99	0.99	0.99	0.99	0.99	0.99
MBNL2	0	0	0	0	0	0	0	0.82	0.8	0.73	0.74	0.75	0.73	0.73	0.7	0.75	0.77	0.82	0.84	0.79	0.82	0.78	0.79	0.82	0.85	0.85	0.82	0.79	0.77	0.75	0.75	0.76	0.76	0.74	0.72	0.74	0.75	0.8	0.81	0.78	0.77	0.83	0.86	0.86	0.88	0.86	0.88	0.9	0.89
MCEE	0	0	0	0	0	0	0	0.51	0.43	0.39	0.38	0.35	0.34	0.34	0.31	0.3	0.31	0.3	0.29	0.28	0.29	0.28	0.28	0.33	0.34	0.34	0.31	0.31	0.32	0.31	0.32	0.32	0.33	0.35	0.37	0.36	0.35	0.31	0.31	0.31	0.32	0.31	0.31	0.33	0.36	0.39	0.44	0.46	0.42
MDH1	0	0	0	0	0	0	0	0.86	0.86	0.85	0.85	0.86	0.86	0.85	0.86	0.85	0.83	0.84	0.84	0.84	0.84	0.86	0.86	0.82	0.8	0.8	0.8	0.86	0.83	0.82	0.8	0.83	0.83	0.83	0.84	0.81	0.82	0.79	0.78	0.81	0.81	0.81	0.82	0.84	0.83	0.83	0.84	0.88	0.89
METAP2	0	0	0	0	0	0	0	0.59	0.52	0.47	0.445	0.425	0.42	0.415	0.405	0.4	0.39	0.38	0.375	0.38	0.39	0.41	0.435	0.46	0.47	0.48	0.48	0.465	0.44	0.43	0.42	0.4	0.405	0.415	0.425	0.44	0.43	0.44	0.445	0.44	0.43	0.435	0.445	0.47	0.475	0.515	0.525	0.515	0.515
MGC11257	0	0	0	0	0	0	0	0.93	0.89	0.89	0.88	0.91	0.91	0.89	0.87	0.87	0.86	0.87	0.86	0.85	0.86	0.87	0.86	0.88	0.88	0.87	0.89	0.9	0.92	0.92	0.92	0.98	0.98	0.97	0.94	0.95	0.92	0.91	0.91	0.9	0.9	0.87	0.87	0.88	0.89	0.89	0.88	0.89	0.89
mimitin	0	0	0	0	0	0	0	0.73	0.63	0.56	0.51	0.495	0.485	0.49	0.485	0.485	0.48	0.47	0.455	0.455	0.455	0.47	0.46	0.47	0.48	0.49	0.5	0.495	0.485	0.47	0.455	0.455	0.455	0.46	0.47	0.47	0.48	0.48	0.505	0.51	0.515	0.505	0.505	0.49	0.5	0.52	0.545	0.54	0.545
MKI67IP	0	0	0	0	0	0	0	0.94	0.91	0.89	0.85	0.85	0.83	0.82	0.83	0.85	0.83	0.83	0.84	0.83	0.84	0.81	0.82	0.79	0.78	0.79	0.78	0.8	0.8	0.82	0.85	0.86	0.86	0.89	0.9	0.88	0.88	0.89	0.89	0.89	0.92	0.91	0.9	0.91	0.91	0.93	0.94	0.94	0.92
MLLT4	0	0	0	0	0	0	0	0.66	0.55	0.54	0.575	0.605	0.605	0.61	0.595	0.595	0.59	0.575	0.595	0.6	0.59	0.575	0.585	0.565	0.555	0.57	0.59	0.55	0.53	0.5	0.455	0.455	0.485	0.5	0.55	0.565	0.555	0.56	0.56	0.57	0.59	0.575	0.575	0.59	0.59	0.57	0.555	0.585	0.605
MRPL37	0	0	0	0	0	0	0	0.97	0.97	0.96	0.96	0.96	0.97	0.97	0.97	0.97	0.94	0.96	0.97	0.96	0.95	0.96	0.96	0.95	0.93	0.93	0.94	0.94	0.94	0.94	0.89	0.89	0.89	0.89	0.88	0.89	0.89	0.91	0.92	0.92	0.92	0.92	0.92	0.92	0.94	0.94	0.96	0.96	0.97
MRPS18B	0	0	0	0	0	0	0	0.71	0.64	0.58	0.59	0.57	0.62	0.62	0.63	0.65	0.62	0.6	0.6	0.6	0.57	0.56	0.54	0.53	0.57	0.58	0.59	0.59	0.62	0.54	0.5	0.47	0.47	0.49	0.51	0.55	0.49	0.5	0.5	0.43	0.44	0.44	0.45	0.47	0.5	0.56	0.6	0.59	0.54
MRTO4	0	0	0	0	0	0	0	0.68	0.6	0.61	0.65	0.64	0.63	0.67	0.65	0.65	0.66	0.64	0.64	0.69	0.69	0.66	0.63	0.63	0.62	0.6	0.58	0.57	0.61	0.62	0.56	0.53	0.5	0.5	0.54	0.56	0.63	0.63	0.6	0.59	0.61	0.63	0.65	0.64	0.69	0.7	0.71	0.77	0.77
MSRA	0	0	0	0	0	0	0	0.83	0.8	0.78	0.75	0.73	0.68	0.64	0.62	0.62	0.61	0.61	0.59	0.57	0.55	0.55	0.55	0.54	0.53	0.53	0.53	0.51	0.51	0.51	0.53	0.54	0.54	0.54	0.53	0.55	0.55	0.56	0.58	0.59	0.59	0.58	0.61	0.6	0.59	0.59	0.6	0.61	0.65
MTPN	0	0	0	0	0	0	0	0.72	0.69	0.66	0.65	0.65	0.64	0.64	0.65	0.66	0.65	0.65	0.66	0.66	0.62	0.62	0.61	0.61	0.61	0.6	0.61	0.63	0.64	0.65	0.67	0.66	0.66	0.65	0.65	0.66	0.67	0.66	0.64	0.62	0.63	0.62	0.59	0.59	0.61	0.61	0.62	0.65	0.68
NACA	0	0	0	0	0	0	0	0.86	0.84	0.85	0.84	0.84	0.84	0.85	0.85	0.85	0.86	0.87	0.87	0.87	0.87	0.86	0.86	0.85	0.86	0.86	0.86	0.87	0.87	0.87	0.88	0.88	0.89	0.89	0.89	0.89	0.89	0.87	0.88	0.87	0.88	0.88	0.89	0.89	0.88	0.89	0.89	0.89	0.9
NASP	0	0	0	0	0	0	0	0.57	0.53	0.48	0.54	0.55	0.53	0.5	0.54	0.53	0.51	0.55	0.5	0.48	0.45	0.43	0.47	0.44	0.45	0.47	0.46	0.49	0.5	0.5	0.52	0.56	0.56	0.54	0.51	0.46	0.45	0.44	0.46	0.46	0.54	0.53	0.47	0.42	0.38	0.39	0.36	0.38	0.38
NCBP2	0	0	0	0	0	0	0	0.87	0.83	0.82	0.8	0.78	0.77	0.74	0.75	0.75	0.77	0.76	0.75	0.74	0.75	0.74	0.74	0.74	0.75	0.75	0.77	0.78	0.79	0.8	0.8	0.8	0.8	0.81	0.81	0.81	0.8	0.8	0.81	0.82	0.82	0.81	0.81	0.81	0.81	0.82	0.83	0.85	0.86
NCL	0	0	0	0	0	0	0	0.93	0.915	0.915	0.91	0.925	0.925	0.925	0.92	0.925	0.92	0.915	0.92	0.92	0.92	0.93	0.935	0.93	0.93	0.925	0.92	0.92	0.925	0.92	0.92	0.92	0.935	0.94	0.945	0.95	0.96	0.965	0.955	0.95	0.95	0.955	0.96	0.955	0.95	0.94	0.94	0.95	0.96
NDUFB8	0	0	0	0	0	0	0	0.9	0.93	0.93	0.9	0.95	0.92	0.92	0.9	0.92	0.9	0.9	0.89	0.92	0.94	0.92	0.92	0.9	0.94	0.94	0.96	0.96	0.95	0.92	0.9	0.89	0.89	0.9	0.87	0.86	0.86	0.88	0.89	0.89	0.9	0.91	0.99	0.97	0.96	0.96	0.92	0.91	0.9
NEXN	0	0	0	0	0	0	0	0.61	0.54	0.53	0.53	0.51	0.49	0.47	0.48	0.47	0.47	0.49	0.5	0.51	0.48	0.48	0.51	0.51	0.51	0.52	0.51	0.5	0.53	0.52	0.51	0.51	0.5	0.51	0.51	0.51	0.52	0.52	0.53	0.52	0.51	0.51	0.51	0.52	0.52	0.52	0.51	0.51	0.51
NGRN	0	0	0	0	0	0	0	0.77	0.765	0.785	0.805	0.825	0.835	0.84	0.83	0.84	0.84	0.84	0.845	0.845	0.85	0.855	0.865	0.875	0.87	0.86	0.865	0.86	0.865	0.865	0.885	0.88	0.87	0.865	0.875	0.88	0.885	0.89	0.905	0.905	0.92	0.925	0.92	0.92	0.93	0.935	0.93	0.94	0.94
NHP2L1	0	0	0	0	0	0	0	0.79	0.7633	0.7633	0.7367	0.7233	0.7167	0.7133	0.6933	0.6833	0.6733	0.68	0.68	0.69	0.69	0.6933	0.7033	0.6967	0.7033	0.7067	0.7067	0.7167	0.73	0.7167	0.7167	0.7167	0.7267	0.7333	0.7333	0.7333	0.7433	0.75	0.7533	0.7467	0.7533	0.7467	0.76	0.7667	0.77	0.79	0.78	0.7833	0.79
NME2	0	0	0	0	0	0	0	0.58	0.5	0.49	0.5	0.49	0.48	0.53	0.5	0.51	0.51	0.5	0.52	0.5	0.5	0.52	0.53	0.5	0.47	0.47	0.47	0.46	0.47	0.49	0.5	0.51	0.51	0.52	0.5	0.5	0.51	0.53	0.49	0.49	0.48	0.47	0.47	0.47	0.44	0.46	0.46	0.47	0.48
NME4	0	0	0	0	0	0	0	0.78	0.72	0.7	0.69	0.7	0.7	0.71	0.7	0.69	0.7	0.7	0.69	0.7	0.7	0.69	0.7	0.71	0.7	0.69	0.68	0.67	0.65	0.65	0.66	0.65	0.65	0.66	0.66	0.65	0.65	0.65	0.67	0.69	0.69	0.69	0.69	0.73	0.73	0.72	0.73	0.76	0.77
NMT1	0	0	0	0	0	0	0	0.87	0.8	0.75	0.69	0.66	0.6	0.59	0.59	0.56	0.56	0.55	0.53	0.52	0.52	0.5	0.49	0.48	0.49	0.49	0.51	0.5	0.51	0.51	0.52	0.52	0.55	0.56	0.57	0.57	0.57	0.59	0.59	0.58	0.6	0.62	0.63	0.64	0.64	0.63	0.64	0.65	0.65
NOL7	0	0	0	0	0	0	0	0.895	0.885	0.92	0.895	0.91	0.9	0.895	0.9	0.9	0.89	0.905	0.91	0.93	0.935	0.91	0.9	0.9	0.925	0.94	0.925	0.93	0.92	0.91	0.935	0.93	0.93	0.93	0.915	0.89	0.885	0.895	0.915	0.9	0.91	0.92	0.94	0.93	0.935	0.945	0.935	0.93	0.935
NPEPPS	0	0	0	0	0	0	0	0.82	0.72	0.61	0.64	0.63	0.68	0.66	0.66	0.66	0.66	0.66	0.66	0.65	0.65	0.62	0.6	0.67	0.67	0.65	0.61	0.59	0.59	0.57	0.55	0.54	0.54	0.54	0.59	0.56	0.56	0.54	0.55	0.55	0.55	0.59	0.58	0.57	0.57	0.61	0.6	0.6	0.59
NPM1	0	0	0	0	0	0	0	0.9337	0.9375	0.94	0.9362	0.9387	0.9437	0.9412	0.9412	0.9438	0.9413	0.9413	0.9425	0.9438	0.9475	0.9512	0.9537	0.9587	0.955	0.9487	0.9525	0.9575	0.9537	0.9563	0.9638	0.9587	0.9638	0.9637	0.9662	0.9663	0.9612	0.9575	0.9563	0.96	0.9575	0.9575	0.9613	0.965	0.9612	0.96	0.9637	0.9637	0.965
NSMCE4A	0	0	0	0	0	0	0	0.69	0.61	0.58	0.6	0.59	0.59	0.6	0.61	0.62	0.63	0.61	0.59	0.55	0.53	0.54	0.54	0.56	0.59	0.6	0.61	0.63	0.65	0.63	0.62	0.6	0.6	0.6	0.63	0.64	0.63	0.65	0.65	0.63	0.63	0.66	0.7	0.71	0.7	0.69	0.67	0.65	0.61
NTAN1	0	0	0	0	0	0	0	0.8	0.74	0.72	0.7	0.71	0.71	0.71	0.69	0.69	0.7	0.68	0.65	0.64	0.63	0.64	0.63	0.6	0.62	0.62	0.59	0.59	0.57	0.58	0.58	0.58	0.59	0.59	0.61	0.61	0.6	0.57	0.56	0.57	0.56	0.6	0.61	0.65	0.66	0.65	0.64	0.64	0.69
NUCKS1	0	0	0	0	0	0	0	0.865	0.86	0.865	0.855	0.865	0.865	0.865	0.86	0.86	0.875	0.88	0.88	0.895	0.885	0.885	0.875	0.87	0.85	0.855	0.865	0.865	0.875	0.87	0.885	0.89	0.885	0.89	0.895	0.895	0.895	0.9	0.905	0.905	0.9	0.905	0.91	0.915	0.925	0.925	0.935	0.935	0.955
NUDCD2	0	0	0	0	0	0	0	0.66	0.66	0.62	0.62	0.65	0.66	0.66	0.66	0.65	0.65	0.63	0.62	0.66	0.63	0.6	0.62	0.61	0.59	0.63	0.65	0.63	0.6	0.61	0.66	0.68	0.66	0.63	0.63	0.65	0.69	0.7	0.66	0.66	0.64	0.67	0.68	0.68	0.7	0.72	0.74	0.75	0.78
NUDT3	0	0	0	0	0	0	0	0.7	0.59	0.54	0.5	0.48	0.47	0.46	0.47	0.49	0.49	0.5	0.49	0.49	0.51	0.47	0.46	0.43	0.43	0.44	0.47	0.48	0.5	0.5	0.5	0.5	0.49	0.49	0.49	0.47	0.48	0.48	0.51	0.51	0.52	0.52	0.54	0.56	0.56	0.56	0.58	0.59	0.58
PABPN1	0	0	0	0	0	0	0	0.66	0.6	0.55	0.55	0.56	0.58	0.59	0.59	0.56	0.51	0.51	0.51	0.52	0.53	0.53	0.53	0.54	0.55	0.57	0.55	0.53	0.52	0.55	0.52	0.51	0.52	0.51	0.53	0.52	0.51	0.52	0.51	0.53	0.55	0.54	0.52	0.55	0.56	0.58	0.57	0.57	0.58
PAGE1	0	0	0	0	0	0	0	0.61	0.55	0.53	0.51	0.51	0.52	0.52	0.53	0.51	0.49	0.48	0.48	0.49	0.5	0.5	0.48	0.5	0.51	0.48	0.43	0.45	0.53	0.53	0.49	0.51	0.54	0.55	0.56	0.58	0.61	0.63	0.64	0.63	0.62	0.62	0.63	0.64	0.63	0.66	0.68	0.7	0.67
PAK2	0	0	0	0	0	0	0	0.83	0.84	0.9	0.83	0.79	0.82	0.81	0.8	0.75	0.73	0.68	0.67	0.66	0.61	0.65	0.59	0.6	0.63	0.68	0.71	0.7	0.71	0.8	0.79	0.89	0.56	0.51	0.61	0.88	0.84	0.86	0.75	0.76	0.71	0.71	0.76	0.84	0.74	0.79	0.91	0.93	0.78
PAWR	0	0	0	0	0	0	0	0.82	0.74	0.65	0.61	0.6	0.61	0.64	0.64	0.7	0.71	0.7	0.68	0.67	0.66	0.69	0.69	0.7	0.7	0.7	0.7	0.7	0.71	0.7	0.69	0.71	0.71	0.72	0.71	0.71	0.71	0.76	0.76	0.73	0.71	0.71	0.68	0.68	0.72	0.74	0.75	0.76	0.77
PCBD1	0	0	0	0	0	0	0	0.79	0.73	0.71	0.74	0.73	0.7	0.74	0.71	0.67	0.73	0.71	0.72	0.77	0.76	0.73	0.66	0.68	0.72	0.77	0.74	0.77	0.83	0.83	0.8	0.77	0.78	0.78	0.79	0.78	0.78	0.76	0.76	0.77	0.71	0.71	0.71	0.69	0.73	0.73	0.66	0.69	0.65
PCMTD2	0	0	0	0	0	0	0	0.75	0.68	0.63	0.58	0.57	0.56	0.55	0.54	0.55	0.54	0.57	0.54	0.53	0.53	0.52	0.52	0.52	0.51	0.52	0.52	0.52	0.53	0.52	0.52	0.53	0.51	0.5	0.51	0.53	0.55	0.56	0.55	0.55	0.53	0.54	0.53	0.54	0.55	0.54	0.54	0.54	0.55
PDCD5	0	0	0	0	0	0	0	0.6367	0.6	0.5667	0.5333	0.52	0.5267	0.53	0.5367	0.5267	0.5233	0.53	0.5267	0.5333	0.5333	0.53	0.53	0.5267	0.4967	0.4933	0.4967	0.49	0.4867	0.5	0.4933	0.5	0.5067	0.5167	0.5133	0.5233	0.5233	0.53	0.53	0.5733	0.5633	0.5733	0.59	0.5933	0.5667	0.5667	0.5933	0.6067	0.6
PDIA5	0	0	0	0	0	0	0	0.75	0.72	0.7	0.67	0.66	0.61	0.59	0.57	0.56	0.54	0.52	0.54	0.53	0.53	0.53	0.52	0.52	0.51	0.51	0.51	0.51	0.52	0.52	0.53	0.53	0.52	0.55	0.55	0.55	0.55	0.56	0.57	0.56	0.53	0.58	0.6	0.59	0.61	0.62	0.65	0.64	0.65
PFDN5	0	0	0	0	0	0	0	0.818	0.756	0.732	0.716	0.696	0.692	0.692	0.69	0.698	0.688	0.676	0.672	0.668	0.666	0.666	0.664	0.668	0.666	0.668	0.67	0.654	0.642	0.644	0.64	0.642	0.634	0.642	0.634	0.636	0.646	0.648	0.656	0.664	0.658	0.668	0.682	0.684	0.69	0.692	0.698	0.702	0.712
PFN1	0	0	0	0	0	0	0	0.67	0.61	0.63	0.64	0.66	0.66	0.67	0.67	0.66	0.66	0.63	0.64	0.62	0.62	0.62	0.63	0.63	0.65	0.65	0.65	0.65	0.67	0.68	0.67	0.64	0.65	0.66	0.62	0.59	0.57	0.57	0.58	0.61	0.61	0.61	0.62	0.64	0.63	0.61	0.61	0.63	0.66
PGK1	0	0	0	0	0	0	0	0.66	0.53	0.46	0.44	0.44	0.41	0.37	0.34	0.37	0.36	0.35	0.36	0.37	0.35	0.37	0.35	0.35	0.33	0.33	0.33	0.34	0.34	0.34	0.36	0.36	0.39	0.37	0.37	0.38	0.4	0.42	0.36	0.33	0.31	0.3	0.3	0.31	0.32	0.31	0.29	0.28	0.26
PHPT1	0	0	0	0	0	0	0	0.57	0.48	0.46	0.48	0.49	0.51	0.51	0.52	0.51	0.51	0.52	0.52	0.52	0.52	0.53	0.52	0.52	0.51	0.52	0.53	0.54	0.53	0.53	0.54	0.56	0.57	0.57	0.56	0.56	0.56	0.57	0.58	0.57	0.56	0.57	0.57	0.57	0.56	0.6	0.62	0.62	0.61
PLEC1	0	0	0	0	0	0	0	0.67	0.55	0.47	0.4	0.38	0.37	0.36	0.35	0.35	0.36	0.32	0.3	0.28	0.27	0.26	0.27	0.28	0.26	0.26	0.25	0.27	0.28	0.29	0.29	0.29	0.29	0.31	0.32	0.32	0.32	0.33	0.35	0.34	0.32	0.31	0.32	0.32	0.31	0.3	0.3	0.3	0.35
PLS3	0	0	0	0	0	0	0	0.53	0.45	0.41	0.37	0.33	0.31	0.32	0.33	0.33	0.32	0.31	0.27	0.25	0.26	0.27	0.28	0.28	0.29	0.28	0.29	0.31	0.29	0.28	0.28	0.28	0.27	0.28	0.28	0.3	0.32	0.32	0.31	0.29	0.28	0.3	0.33	0.31	0.32	0.33	0.35	0.38	0.42
POLR1D	0	0	0	0	0	0	0	0.61	0.63	0.64	0.63	0.6	0.6	0.59	0.59	0.6	0.58	0.59	0.58	0.59	0.57	0.58	0.58	0.57	0.58	0.61	0.61	0.61	0.63	0.64	0.67	0.66	0.67	0.68	0.69	0.71	0.73	0.73	0.7	0.75	0.75	0.75	0.75	0.75	0.74	0.74	0.75	0.73	0.72
POLR2G	0	0	0	0	0	0	0	0.5	0.45	0.44	0.42	0.42	0.42	0.42	0.41	0.41	0.4	0.4	0.39	0.39	0.4	0.4	0.42	0.42	0.42	0.43	0.43	0.45	0.44	0.46	0.47	0.45	0.45	0.45	0.48	0.47	0.49	0.53	0.53	0.52	0.52	0.53	0.53	0.53	0.53	0.52	0.55	0.56	0.54
POLR3GL	0	0	0	0	0	0	0	0.89	0.87	0.86	0.86	0.85	0.84	0.83	0.83	0.82	0.83	0.83	0.82	0.83	0.83	0.83	0.84	0.84	0.83	0.84	0.85	0.85	0.84	0.84	0.86	0.85	0.84	0.84	0.84	0.85	0.86	0.86	0.85	0.86	0.86	0.86	0.86	0.87	0.86	0.86	0.86	0.86	0.87
PPFIBP1	0	0	0	0	0	0	0	0.63	0.67	0.76	0.84	0.84	0.74	0.78	0.8	0.81	0.76	0.78	0.77	0.76	0.71	0.7	0.69	0.69	0.72	0.63	0.67	0.68	0.68	0.69	0.7	0.72	0.66	0.72	0.71	0.7	0.72	0.74	0.84	0.85	0.75	0.71	0.76	0.77	0.78	0.86	0.82	0.87	0.86
PPIA	0	0	0	0	0	0	0	0.8	0.746	0.704	0.69	0.69	0.688	0.686	0.676	0.668	0.66	0.652	0.656	0.656	0.666	0.652	0.654	0.646	0.656	0.65	0.656	0.666	0.682	0.678	0.678	0.682	0.676	0.686	0.69	0.698	0.698	0.69	0.704	0.706	0.722	0.728	0.724	0.706	0.706	0.694	0.704	0.714	0.718
PPP1R14B	0	0	0	0	0	0	0	0.68	0.7	0.71	0.73	0.75	0.75	0.75	0.74	0.75	0.75	0.73	0.73	0.75	0.73	0.75	0.76	0.78	0.78	0.78	0.76	0.73	0.76	0.77	0.77	0.77	0.75	0.76	0.77	0.76	0.78	0.79	0.78	0.77	0.78	0.79	0.82	0.8	0.8	0.83	0.85	0.84	0.85
PRC1	0	0	0	0	0	0	0	0.4333	0.3767	0.3533	0.3533	0.3367	0.3433	0.3467	0.3533	0.3767	0.3867	0.4133	0.41	0.4167	0.4267	0.45	0.47	0.4833	0.5	0.5267	0.5267	0.5567	0.5533	0.57	0.58	0.5967	0.6067	0.6233	0.6233	0.64	0.6433	0.66	0.6633	0.6633	0.6833	0.6967	0.7	0.7233	0.7333	0.7467	0.7567	0.7533	0.7667
PREPL	0	0	0	0	0	0	0	0.69	0.61	0.6	0.63	0.65	0.63	0.64	0.59	0.58	0.57	0.57	0.49	0.46	0.48	0.49	0.51	0.5	0.48	0.45	0.44	0.46	0.43	0.42	0.39	0.41	0.41	0.39	0.4	0.41	0.43	0.46	0.48	0.49	0.5	0.5	0.48	0.47	0.48	0.5	0.51	0.54	0.55
PRKAR2A	0	0	0	0	0	0	0	0.58	0.52	0.48	0.45	0.45	0.45	0.45	0.49	0.47	0.48	0.45	0.44	0.41	0.39	0.38	0.39	0.41	0.4	0.42	0.44	0.44	0.43	0.42	0.44	0.48	0.5	0.53	0.59	0.6	0.59	0.58	0.58	0.56	0.53	0.5	0.48	0.49	0.49	0.49	0.48	0.5	0.49
[truncated: 133 more rows]
[truncated: 20 more columns]

## Sheet: contrast
	frames	a frame was taken each 20 minutes - so 3 frames correspond to 1 hour)
[truncated: 275 more rows]
[truncated: 20 more columns]

## Sheet: energy
	frames	a frame was taken each 20 minutes - so 3 frames correspond to 1 hour)
[truncated: 400 more rows]
[truncated: 21 more columns]

## Sheet: correlation
	frames	a frame was taken each 20 minutes - so 3 frames correspond to 1 hour)
[truncated: 515 more rows]
[truncated: 21 more columns]

[truncated: 1 more sheets: homogeneity]
